# Supplementary material for: Symmetric spirenes: promising building blocks for new generation opto-electronic materials
Source: Royal Society of Chemistry journal article supplement (doi:10.1039/d2cp01920e), 2022-01-01
Supplement: d2cp01920e1.pdf [file d2cp01920e1.pdf]

Electronic Supporting Information

# Symmetric Spirenes: Promising Building Blocks for New Generation Opto-Electronic Materials

*Kirill M. Shepovarov,<sup>‡</sup> Enrico Benassi,<sup>‡\*</sup> Roman Yu. Peshkov, Evgeny A. Mostovich*

Novosibirsk State University, Pirogova str. 2, Novosibirsk 630090, Russian Federation.

\* Corresponding Author: ebenassi3@gmail.com

<sup>‡</sup> These Authors equally contributed.

## Contents

|                                                                                                                                                                                                                                                                                                                         |    |
|-------------------------------------------------------------------------------------------------------------------------------------------------------------------------------------------------------------------------------------------------------------------------------------------------------------------------|----|
| Table S1. Relative values of full electronic energies (E), zero-point energies (ZPE), their sum, enthalpies (H) and Gibbs free energies (G), computed for different multiplicity states of 1.....                                                                                                                       | 5  |
| Figure S1. Gibbs free energy differences ( $\Delta G$ , at $T = 298.15$ K and $p = 1.00$ atm, in kJ/mol) between the different spin multiplicity states of 1.....                                                                                                                                                       | 10 |
| Figure S2. Root mean square deviations (RMSD) of calculated geometrical parameters of 1 vs. X-Ray data .....                                                                                                                                                                                                            | 11 |
| Figure S3. Intercepts (A) and slopes (B) obtained upon least-squares linear regressions between experimental and computed IR wavenumbers for 1.....                                                                                                                                                                     | 12 |
| Figure S4. Root mean square deviations (eV) of calculated vertical singlet excitation energies vs experimental UV-Vis data for 1 .....                                                                                                                                                                                  | 13 |
| Figure S5. Root mean square deviations (in eV) of calculated vertical excitation energies vs electron energy loss spectroscopy data for 1 .....                                                                                                                                                                         | 14 |
| Table S2. Interatomic distances (in units of $10^{-10}$ m) and bond angles (in degrees) of the optimised geometries of neutral, radical cation and radical anion forms of compounds 1-6. For radical spirenes, the values measured for ring A and B are separated by semi-colons. Level of theory: CCSD / 6-31G*. ..... | 15 |
| Table S3. Topological properties for neutral, radical anion and radical cation of molecules 1-6.....                                                                                                                                                                                                                    | 17 |
| Cartesian coordinates of optimised geometry of molecule 1 .....                                                                                                                                                                                                                                                         | 27 |
| B3LYP, closed-shell singlet.....                                                                                                                                                                                                                                                                                        | 27 |
| B3LYP, restricted open shell singlet.....                                                                                                                                                                                                                                                                               | 28 |
| B3LYP, triplet .....                                                                                                                                                                                                                                                                                                    | 29 |

|                                                      |    |
|------------------------------------------------------|----|
| B3LYP, quintuplet .....                              | 30 |
| B3LYP[GD3BJ], closed-shell singlet .....             | 31 |
| B3LYP[GD3BJ], restricted open shell singlet .....    | 32 |
| B3LYP[GD3BJ], triplet .....                          | 33 |
| B3LYP[GD3BJ], quintuplet.....                        | 34 |
| BLYP, closed-shell singlet.....                      | 35 |
| BLYP, restricted open shell singlet.....             | 36 |
| BLYP, triplet .....                                  | 37 |
| BLYP, quintuplet .....                               | 38 |
| BP86, closed-shell singlet .....                     | 39 |
| BP86, restricted open shell singlet .....            | 40 |
| BP86, triplet.....                                   | 41 |
| BP86, quintuplet.....                                | 42 |
| CAM-B3LYP, closed-shell singlet.....                 | 43 |
| CAM-B3LYP, restricted open shell singlet.....        | 44 |
| CAM-B3LYP, triplet .....                             | 45 |
| CAM-B3LYP, quintuplet .....                          | 46 |
| CAM-B3LYP[GD3BJ], closed-shell singlet.....          | 47 |
| CAM-B3LYP[GD3BJ], restricted open shell singlet..... | 48 |
| CAM-B3LYP[GD3BJ], triplet .....                      | 49 |
| CAM-B3LYP[GD3BJ], quintuplet.....                    | 50 |
| HF, closed-shell singlet .....                       | 51 |
| HF, restricted open shell singlet .....              | 52 |
| HF, triplet.....                                     | 53 |
| HF, quintuplet.....                                  | 54 |
| M06-2X, closed-shell singlet.....                    | 55 |
| M06-2X, restricted open shell singlet.....           | 56 |
| M06-2X, triplet .....                                | 57 |
| M06-2X, quintuplet .....                             | 58 |
| PBE0, closed-shell singlet .....                     | 59 |
| PBE0, restricted open shell singlet .....            | 60 |
| PBE0, triplet.....                                   | 61 |

|                                                                                                                                                                                                     |     |
|-----------------------------------------------------------------------------------------------------------------------------------------------------------------------------------------------------|-----|
| PBE0, quintuplet .....                                                                                                                                                                              | 62  |
| PBE0[GD3BJ], closed-shell singlet.....                                                                                                                                                              | 63  |
| PBE0[GD3BJ], restricted open shell singlet.....                                                                                                                                                     | 64  |
| PBE0[GD3BJ], triplet .....                                                                                                                                                                          | 65  |
| PBE0[GD3BJ], quintuplet .....                                                                                                                                                                       | 66  |
| PBEPBE, closed-shell singlet .....                                                                                                                                                                  | 67  |
| PBEPBE, restricted open shell singlet .....                                                                                                                                                         | 68  |
| PBEPBE, triplet.....                                                                                                                                                                                | 69  |
| PBEPBE, quintuplet.....                                                                                                                                                                             | 70  |
| PW91, closed-shell singlet .....                                                                                                                                                                    | 71  |
| PW91, restricted open shell singlet.....                                                                                                                                                            | 72  |
| PW91, triplet .....                                                                                                                                                                                 | 73  |
| PW91, quintuplet.....                                                                                                                                                                               | 74  |
| $\omega$ B97X[D], closed-shell singlet.....                                                                                                                                                         | 75  |
| $\omega$ B97X[D], restricted open shell singlet.....                                                                                                                                                | 76  |
| $\omega$ B97X[D], triplet .....                                                                                                                                                                     | 77  |
| $\omega$ B97X[D], quintuplet .....                                                                                                                                                                  | 78  |
| MP2, closed-shell singlet .....                                                                                                                                                                     | 79  |
| CASSCF (8,8) / 6-31G*.....                                                                                                                                                                          | 80  |
| Cartesian coordinates of optimised geometries of molecules 1-6 and their corresponding monoanions and monocations at CCSD / 6-31G* level.....                                                       | 81  |
| Comparison of the geometrical parameters of molecule 1, computed at different levels of theory, and corresponding linear regression parameters and RMSDs, compared to experimental data. ....       | 83  |
| Bond length .....                                                                                                                                                                                   | 83  |
| Bond angles .....                                                                                                                                                                                   | 86  |
| Dihedral angles .....                                                                                                                                                                               | 89  |
| Comparison of the vibrational frequencies of molecule 1, computed at different levels of theory, and corresponding linear regression parameters, compared to experimental data. ....                | 92  |
| Vibrational Spectra .....                                                                                                                                                                           | 95  |
| Comparison of the diabatic electronic excitations of molecule 1, computed at different levels off theory, corresponding linear regression parameters and RMSDs, compared to experimental data. .... | 106 |
| Singlet excitations (TD-DFT) for molecule 1 .....                                                                                                                                                   | 107 |
| Singlet excitations (TDA-DFT) for molecule 1 .....                                                                                                                                                  | 108 |

|                                                                                                                                                                                                                                                                                                  |     |
|--------------------------------------------------------------------------------------------------------------------------------------------------------------------------------------------------------------------------------------------------------------------------------------------------|-----|
| Triplet excitations (TD-DFT) for molecule 1.....                                                                                                                                                                                                                                                 | 109 |
| Triplet excitations (TDA-DFT) for molecule 1.....                                                                                                                                                                                                                                                | 110 |
| Figure S6. Vibronic progressions of the first UV-Vis absorption band computed at TD-DFT CAM-B3LYP / 6-311++G** ((a) VG, (b) VH and (c) AH; red sticks) and their Gaussian convolution (HWHM = 150 cm <sup>-1</sup> ; purple line) in gas phase. No shift along the energy axis was applied. .... | 111 |

**Table S1.** Relative values of full electronic energies (E), zero-point energies (ZPE), their sum, enthalpies (H) and Gibbs free energies (G), computed for different multiplicity states of **1** (closed shell singlet (CSS), restricted open shell singlet (ROSS), triplet (T) and quintuplet (Q)) using different levels of theory. All values are computed at  $T = 298.15$  K and  $p = 1.00$  atm and reported in units of  $\text{kJ} \cdot \text{mol}^{-1}$ .

| Model chemistry  | Basis Set   | Spin Multiplicity | E     | ZPE  | E+ZPE | H     | G     |
|------------------|-------------|-------------------|-------|------|-------|-------|-------|
| DFT B3LYP        | 6-31+G**    | CSS               | 0.0   | 23.2 | 0.0   | 0.0   | 0.0   |
|                  |             | ROSS              | 0.0   | 23.2 | 0.0   | 0.0   | 0.0   |
|                  |             | T                 | 212.4 | 12.3 | 201.5 | 203.4 | 196.9 |
|                  |             | Q                 | 446.2 | 0.0  | 422.9 | 427.2 | 413.2 |
|                  | 6-311++G**  | CSS               | 0.0   | 23.3 | 0.0   | 0.0   | 0.0   |
|                  |             | ROSS              | 0.0   | 23.3 | 0.0   | 0.0   | 0.0   |
|                  |             | T                 | 214.7 | 12.4 | 203.8 | 205.7 | 199.2 |
|                  |             | Q                 | 451.1 | 0.0  | 427.8 | 432.2 | 417.5 |
|                  | Aug-cc-pVTZ | CSS               | 0.0   | 23.4 | 0.0   | 0.0   | 0.0   |
|                  |             | ROSS              | 0.0   | 23.4 | 0.0   | 0.0   | 0.0   |
|                  |             | T                 | 216.1 | 12.5 | 205.2 | 207.1 | 200.6 |
|                  |             | Q                 | 454.2 | 0.0  | 430.8 | 435.2 | 420.3 |
| DFT B3LYP[GD3BJ] | 6-31+G**    | CSS               | 0.0   | 23.4 | 0.0   | 0.0   | 0.0   |
|                  |             | ROSS              | 0.0   | 23.4 | 0.0   | 0.0   | 0.0   |
|                  |             | T                 | 213.2 | 12.4 | 202.3 | 204.2 | 197.6 |
|                  |             | Q                 | 448.6 | 0.0  | 425.2 | 429.6 | 415.0 |
|                  | 6-311++G**  | CSS               | 0.0   | 23.5 | 0.0   | 0.0   | 0.0   |
|                  |             | ROSS              | 0.0   | 23.5 | 0.0   | 0.0   | 0.0   |
|                  |             | T                 | 169.7 | 16.1 | 162.3 | 161.7 | 162.0 |
|                  |             | Q                 | 453.4 | 0.0  | 430.0 | 434.5 | 419.1 |
|                  | Aug-cc-pVTZ | CSS               | 0.0   | 23.6 | 0.0   | 0.0   | 0.0   |
|                  |             | ROSS              | 0.0   | 23.6 | 0.0   | 0.0   | 0.0   |
|                  |             | T                 | 216.9 | 12.6 | 206.0 | 207.9 | 201.3 |
|                  |             | Q                 | 456.5 | 0.0  | 433.0 | 437.5 | 421.8 |
| DFT BLYP         | 6-31+G**    | CSS               | 0.0   | 21.8 | 0.0   | 0.0   | 0.0   |
|                  |             | ROSS              | 0.0   | 21.8 | 0.0   | 0.0   | 0.0   |
|                  |             | T                 | 209.7 | 11.7 | 199.6 | 201.4 | 195.1 |
|                  |             | Q                 | 450.0 | 0.0  | 428.2 | 432.5 | 418.1 |
|                  | 6-311++G**  | CSS               | 0.0   | 22.1 | 0.0   | 0.0   | 0.0   |
|                  |             | ROSS              | 0.0   | 22.1 | 0.0   | 0.0   | 0.0   |
|                  |             | T                 | 212.3 | 11.9 | 202.2 | 204.1 | 197.6 |
|                  |             | Q                 | 455.6 | 0.0  | 433.5 | 438.0 | 422.1 |
|                  | Aug-cc-pVTZ | CSS               | 0.0   | 22.2 | 0.0   | 0.0   | 0.0   |
|                  |             | ROSS              | 0.0   | 22.2 | 0.0   | 0.0   | 0.0   |
|                  |             | T                 | 213.5 | 12.0 | 203.3 | 205.2 | 198.7 |
|                  |             | Q                 | 458.2 | 0.0  | 436.0 | 440.5 | 424.0 |

**Table S1. (continued)**

|                      |             |      |       |      |       |       |       |
|----------------------|-------------|------|-------|------|-------|-------|-------|
| DFT BP86             | 6-31+G**    | CSS  | 0.0   | 21.7 | 0.0   | 0.0   | 0.0   |
|                      |             | ROSS | 0.0   | 21.7 | 0.0   | 0.0   | 0.0   |
|                      |             | T    | 209.2 | 11.7 | 199.1 | 201.0 | 194.6 |
|                      |             | Q    | 447.8 | 0.0  | 426.1 | 430.5 | 413.8 |
|                      | 6-311++G**  | CSS  | 0.0   | 22.0 | 0.0   | 0.0   | 0.0   |
|                      |             | ROSS | 0.0   | 22.0 | 0.0   | 0.0   | 0.0   |
|                      |             | T    | 211.3 | 11.9 | 201.2 | 203.1 | 196.6 |
|                      |             | Q    | 452.4 | 0.0  | 430.4 | 435.1 | 412.7 |
|                      | Aug-cc-pVTZ | CSS  | 0.0   | 22.0 | 0.0   | 0.0   | 0.0   |
|                      |             | ROSS | 0.0   | 22.0 | 0.0   | 0.0   | 0.0   |
|                      |             | T    | 212.1 | 11.8 | 202.0 | 203.9 | 197.4 |
|                      |             | Q    | 454.1 | 0.0  | 432.2 | 436.7 | 418.7 |
| DFT CAM-B3LYP        | 6-31+G**    | CSS  | 0.0   | 24.4 | 0.0   | 0.0   | 0.0   |
|                      |             | ROSS | 0.0   | 24.4 | 0.0   | 0.0   | 0.0   |
|                      |             | T    | 216.8 | 12.8 | 205.2 | 207.2 | 200.5 |
|                      |             | Q    | 448.6 | 0.0  | 424.2 | 428.6 | 414.4 |
|                      | 6-311++G**  | CSS  | 0.0   | 24.3 | 0.0   | 0.0   | 0.0   |
|                      |             | ROSS | 0.0   | 24.3 | 0.0   | 0.0   | 0.0   |
|                      |             | T    | 219.3 | 12.8 | 207.7 | 209.7 | 202.9 |
|                      |             | Q    | 453.7 | 0.0  | 429.3 | 433.8 | 419.0 |
|                      | Aug-cc-pVTZ | CSS  | 0.0   | 24.4 | 0.0   | 0.0   | 0.0   |
|                      |             | ROSS | 0.0   | 24.4 | 0.0   | 0.0   | 0.0   |
|                      |             | T    | 220.9 | 12.8 | 209.3 | 211.3 | 204.6 |
|                      |             | Q    | 457.2 | 0.0  | 432.8 | 437.2 | 422.2 |
| DFT CAM-B3LYP[GD3BJ] | 6-31+G**    | CSS  | 0.0   | 24.4 | 0.0   | 0.0   | 0.0   |
|                      |             | ROSS | 0.0   | 24.4 | 0.0   | 0.0   | 0.0   |
|                      |             | T    | 217.2 | 12.8 | 205.6 | 207.6 | 200.8 |
|                      |             | Q    | 449.6 | 0.0  | 425.2 | 429.6 | 415.1 |
|                      | 6-311++G**  | CSS  | 0.0   | 24.4 | 0.0   | 0.0   | 0.0   |
|                      |             | ROSS | 0.0   | 24.4 | 0.0   | 0.0   | 0.0   |
|                      |             | T    | 219.6 | 12.8 | 208.1 | 210.1 | 203.3 |
|                      |             | Q    | 454.7 | 0.0  | 430.3 | 434.8 | 419.7 |
|                      | Aug-cc-pVTZ | CSS  | 0.0   | 24.5 | 0.0   | 0.0   | 0.0   |
|                      |             | ROSS | 0.0   | 24.5 | 0.0   | 0.0   | 0.0   |
|                      |             | T    | 221.3 | 12.9 | 209.7 | 211.7 | 204.9 |
|                      |             | Q    | 458.1 | 0.0  | 433.7 | 438.2 | 422.9 |

Table S1. (continued)

|            |             |      |       |      |       |       |       |
|------------|-------------|------|-------|------|-------|-------|-------|
| HF         | 6-31+G**    | CSS  | 17.2  | 28.6 | 30.4  | 29.7  | 30.8  |
|            |             | ROSS | 0.0   | 15.4 | 0.0   | 0.0   | 0.0   |
|            |             | T    | 94.8  | 14.8 | 94.2  | 93.3  | 93.6  |
|            |             | Q    | 305.0 | 0.0  | 289.6 | 292.4 | 282.4 |
|            | 6-311++G**  | CSS  | 670.6 | 3.2  | 658.4 | 658.8 | 655.0 |
|            |             | ROSS | 15.0  | 28.6 | 27.8  | 27.1  | 28.2  |
|            |             | T    | 0.0   | 15.8 | 0.0   | 0.0   | 0.0   |
|            |             | Q    | 97.9  | 14.8 | 96.9  | 96.1  | 96.3  |
|            | Aug-cc-pVTZ | CSS  | 305.5 | 0.0  | 289.7 | 292.7 | 282.3 |
|            |             | ROSS | 673.0 | 3.2  | 660.4 | 660.8 | 656.9 |
|            |             | T    | 12.1  | 28.8 | 24.4  | 23.7  | 24.7  |
|            |             | Q    | 0.0   | 16.5 | 0.0   | 0.0   | 0.0   |
| DFT M06-2X | 6-31+G**    | CSS  | 97.7  | 15.2 | 96.4  | 95.6  | 95.8  |
|            |             | ROSS | 308.4 | 0.0  | 291.9 | 294.9 | 284.3 |
|            |             | T    | 677.7 | 3.1  | 664.3 | 664.8 | 660.8 |
|            |             | Q    | 0.0   | 24.0 | 0.0   | 0.0   | 0.0   |
|            | 6-311++G**  | CSS  | 0.0   | 24.0 | 0.0   | 0.0   | 0.0   |
|            |             | ROSS | 237.2 | 12.5 | 225.8 | 227.9 | 220.6 |
|            |             | T    | 486.2 | 0.0  | 462.2 | 466.9 | 450.8 |
|            |             | Q    | 0.0   | 24.1 | 0.0   | 0.0   | 0.0   |
|            | Aug-cc-pVTZ | CSS  | 0.0   | 24.1 | 0.0   | 0.0   | 0.0   |
|            |             | ROSS | 237.0 | 12.7 | 225.6 | 227.7 | 220.3 |
|            |             | T    | 486.1 | 0.0  | 462.0 | 466.7 | 450.0 |
|            |             | Q    | 0.0   | 24.3 | 0.0   | 0.0   | 0.0   |
| DFT PBE0   | 6-31+G**    | CSS  | 0.0   | 24.3 | 0.0   | 0.0   | 0.0   |
|            |             | ROSS | 238.4 | 12.8 | 226.9 | 229.0 | 221.6 |
|            |             | T    | 488.7 | 0.0  | 464.3 | 469.2 | 450.6 |
|            |             | Q    | 0.0   | 23.6 | 0.0   | 0.0   | 0.0   |
|            | 6-311++G**  | CSS  | 0.0   | 23.6 | 0.0   | 0.0   | 0.0   |
|            |             | ROSS | 208.1 | 12.5 | 196.9 | 198.9 | 192.3 |
|            |             | T    | 434.2 | 0.0  | 410.5 | 415.0 | 399.7 |
|            |             | Q    | 0.0   | 23.7 | 0.0   | 0.0   | 0.0   |
|            | Aug-cc-pVTZ | CSS  | 0.0   | 23.7 | 0.0   | 0.0   | 0.0   |
|            |             | ROSS | 209.9 | 12.6 | 198.8 | 200.8 | 194.1 |
|            |             | T    | 438.2 | 0.0  | 414.5 | 419.0 | 402.9 |
|            |             | Q    | 0.0   | 23.8 | 0.0   | 0.0   | 0.0   |

Table S1. (continued)

|                 |             |      |       |      |       |       |       |
|-----------------|-------------|------|-------|------|-------|-------|-------|
| DFT PBEO[GD3BJ] | 6-31+G**    | CSS  | 0.0   | 23.7 | 0.0   | 0.0   | 0.0   |
|                 |             | ROSS | 0.0   | 23.7 | 0.0   | 0.0   | 0.0   |
|                 |             | T    | 208.5 | 12.5 | 197.4 | 199.3 | 192.6 |
|                 |             | Q    | 435.4 | 0.0  | 411.6 | 416.1 | 400.4 |
|                 | 6-311++G**  | CSS  | 0.0   | 23.8 | 0.0   | 0.0   | 0.0   |
|                 |             | ROSS | 0.0   | 23.8 | 0.0   | 0.0   | 0.0   |
|                 |             | T    | 210.3 | 12.6 | 199.2 | 201.2 | 194.4 |
|                 |             | Q    | 439.3 | 0.0  | 415.6 | 420.2 | 403.4 |
|                 | Aug-cc-pVTZ | CSS  | 0.0   | 23.8 | 0.0   | 0.0   | 0.0   |
|                 |             | ROSS | 0.0   | 23.8 | 0.0   | 0.0   | 0.0   |
|                 |             | T    | 211.2 | 12.7 | 200.0 | 202.0 | 195.3 |
|                 |             | Q    | 441.1 | 0.0  | 417.3 | 421.9 | 404.6 |
| DFT PBEPE       | 6-31+G**    | CSS  | 0.0   | 22.0 | 0.0   | 0.0   | 0.0   |
|                 |             | ROSS | 0.0   | 22.0 | 0.0   | 0.0   | 0.0   |
|                 |             | T    | 209.8 | 11.9 | 199.7 | 201.6 | 195.1 |
|                 |             | Q    | 449.2 | 0.0  | 427.2 | 431.9 | 409.9 |
|                 | 6-311++G**  | CSS  | 0.0   | 21.8 | 0.0   | 0.0   | 0.0   |
|                 |             | ROSS | 0.0   | 21.8 | 0.0   | 0.0   | 0.0   |
|                 |             | T    | 211.9 | 11.7 | 201.8 | 203.8 | 197.1 |
|                 |             | Q    | 453.9 | 0.0  | 432.1 | 436.6 | 420.2 |
|                 | Aug-cc-pVTZ | CSS  | 0.0   | 21.8 | 0.0   | 0.0   | 0.0   |
|                 |             | ROSS | 0.0   | 21.8 | 0.0   | 0.0   | 0.0   |
|                 |             | T    | 212.5 | 11.7 | 202.4 | 204.3 | 197.8 |
|                 |             | Q    | 455.1 | 0.0  | 433.3 | 437.7 | 422.3 |
| DFT PW91        | 6-31+G**    | CSS  | 0.0   | 22.0 | 0.0   | 0.0   | 0.0   |
|                 |             | ROSS | 0.0   | 22.0 | 0.0   | 0.0   | 0.0   |
|                 |             | T    | 209.0 | 11.9 | 198.9 | 200.8 | 194.3 |
|                 |             | Q    | 447.4 | 0.0  | 425.5 | 430.1 | 410.6 |
|                 | 6-311++G**  | CSS  | 0.0   | 21.9 | 0.0   | 0.0   | 0.0   |
|                 |             | ROSS | 0.0   | 21.9 | 0.0   | 0.0   | 0.0   |
|                 |             | T    | 211.2 | 11.8 | 201.1 | 203.1 | 196.5 |
|                 |             | Q    | 452.4 | 0.0  | 430.5 | 435.0 | 418.1 |
|                 | Aug-cc-pVTZ | CSS  | 0.0   | 22.0 | 0.0   | 0.0   | 0.0   |
|                 |             | ROSS | 0.0   | 22.0 | 0.0   | 0.0   | 0.0   |
|                 |             | T    | 212.0 | 11.8 | 201.9 | 203.8 | 197.3 |
|                 |             | Q    | 454.0 | 0.0  | 432.0 | 436.5 | 420.5 |



**Table S1. (continued)**

|                       |             |      |       |      |       |       |       |
|-----------------------|-------------|------|-------|------|-------|-------|-------|
| DFT $\omega$ -B97X[D] | 6-31+G**    | CSS  | 0.0   | 24.2 | 0.0   | 0.0   | 0.0   |
|                       |             | ROSS | 0.0   | 24.2 | 0.0   | 0.0   | 0.0   |
|                       |             | T    | 221.4 | 12.7 | 209.9 | 211.9 | 205.2 |
|                       |             | Q    | 457.8 | 0.0  | 433.6 | 438.0 | 423.6 |
|                       | 6-311+G**   | CSS  | 0.0   | 24.2 | 0.0   | 0.0   | 0.0   |
|                       |             | ROSS | 0.0   | 24.2 | 0.0   | 0.0   | 0.0   |
|                       |             | T    | 223.5 | 12.8 | 212.0 | 214.0 | 207.2 |
|                       |             | Q    | 462.3 | 0.0  | 438.1 | 442.6 | 427.6 |
|                       | Aug-cc-pVTZ | CSS  | 0.0   | 24.3 | 0.0   | 0.0   | 0.0   |
|                       |             | ROSS | 0.0   | 24.3 | 0.0   | 0.0   | 0.0   |
|                       |             | T    | 224.9 | 12.8 | 213.4 | 215.4 | 208.7 |
|                       |             | Q    | 465.0 | 0.0  | 440.8 | 445.3 | 430.1 |

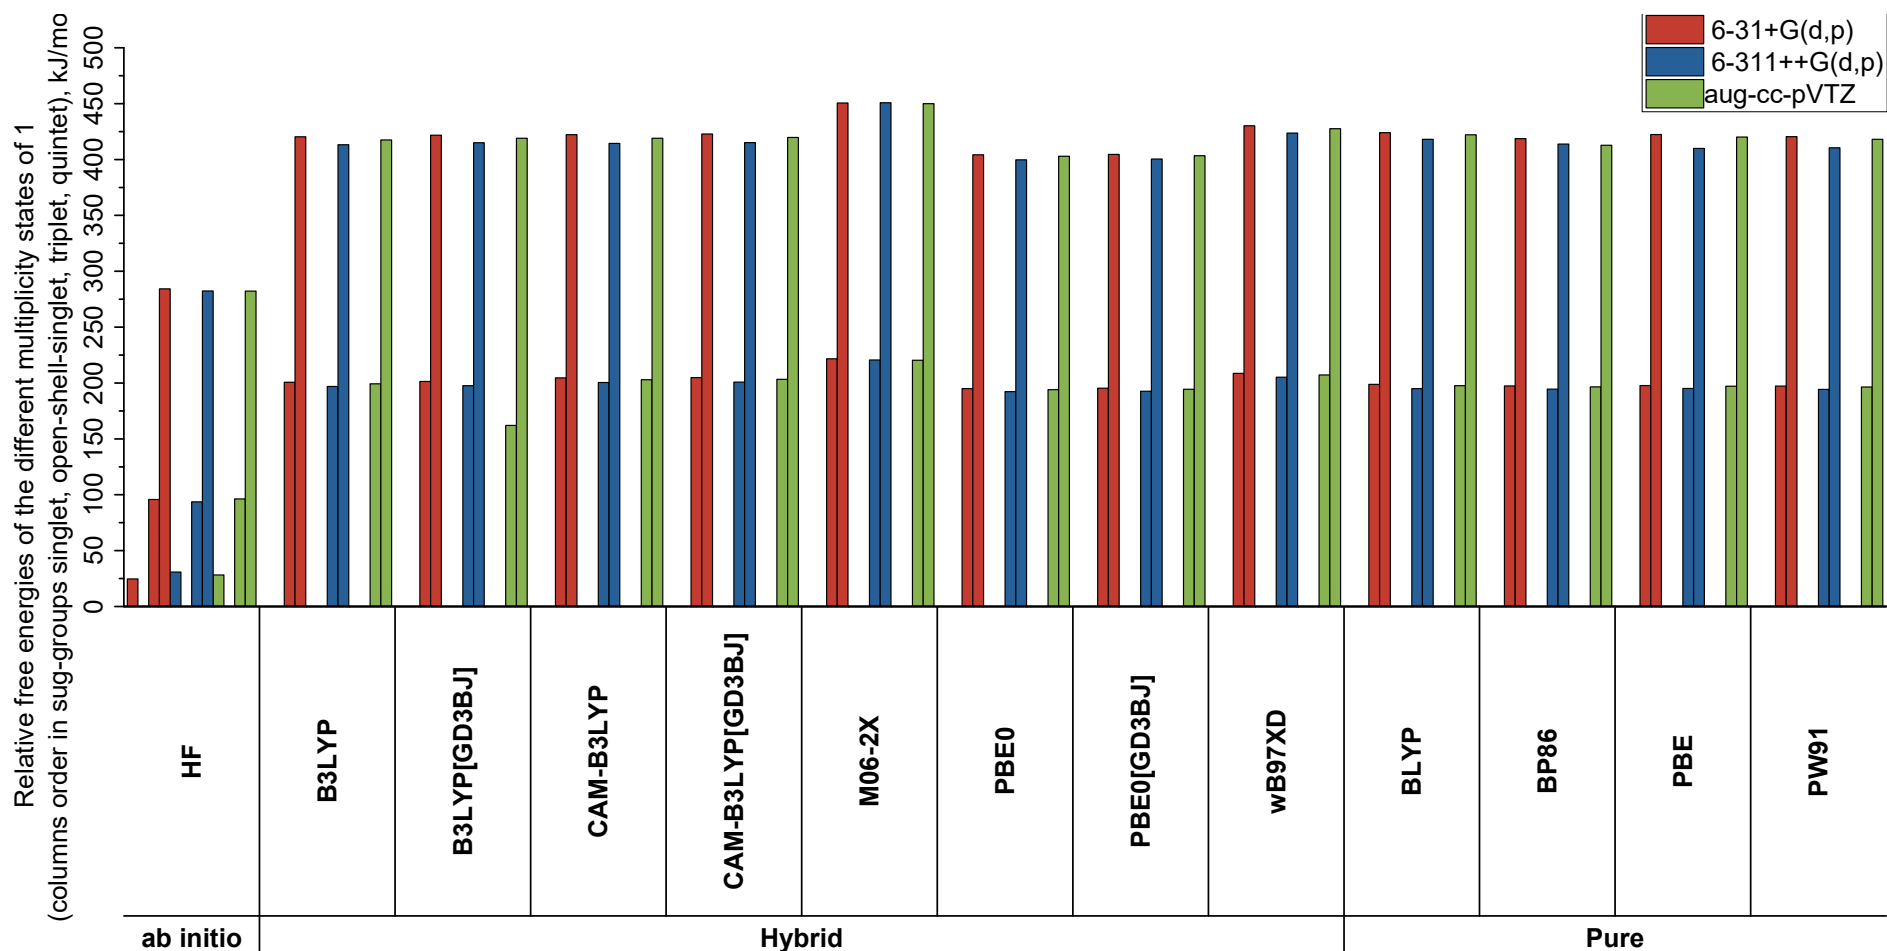

**Figure S1.** Gibbs free energy differences ( $\Delta G$ , at  $T = 298.15$  K and  $p = 1.00$  atm, in kJ/mol) between the different spin multiplicity states of **1** (first columns: CS singlet; second columns: OS singlet; third columns: triplet; fourth columns: quintuplet), computed at different levels of theory.

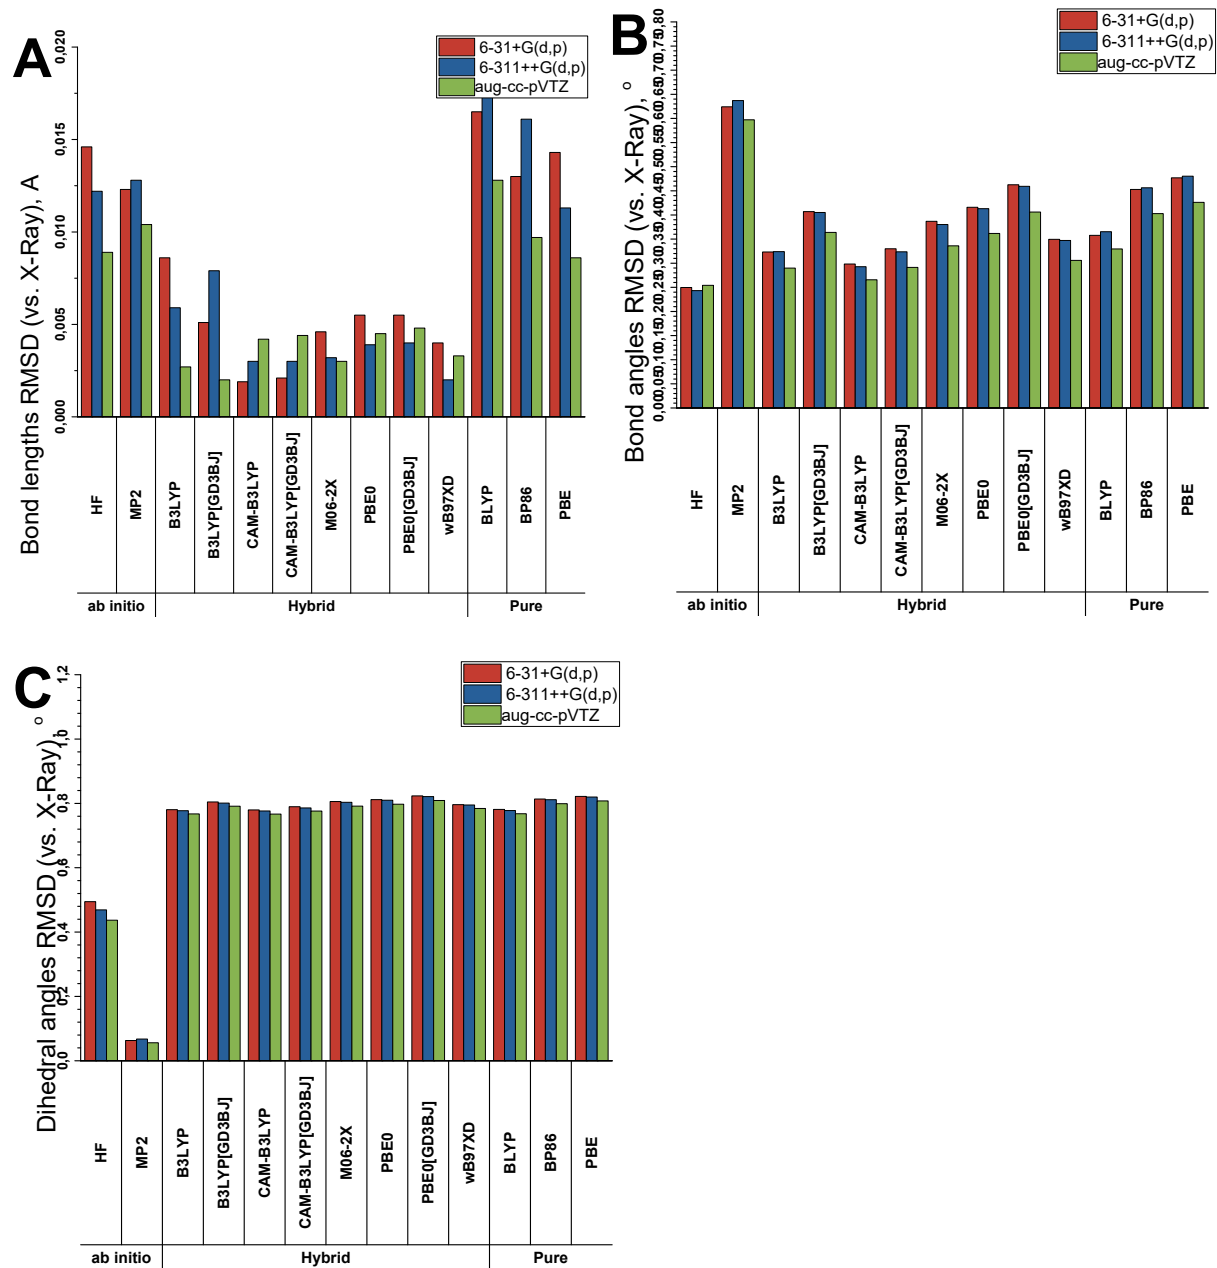

**Figure S2.** Root mean square deviations (RMSD) of calculated geometrical parameters of **1** vs. X-Ray data: bond lengths (A), bond angles (B); dihedral angles (C).

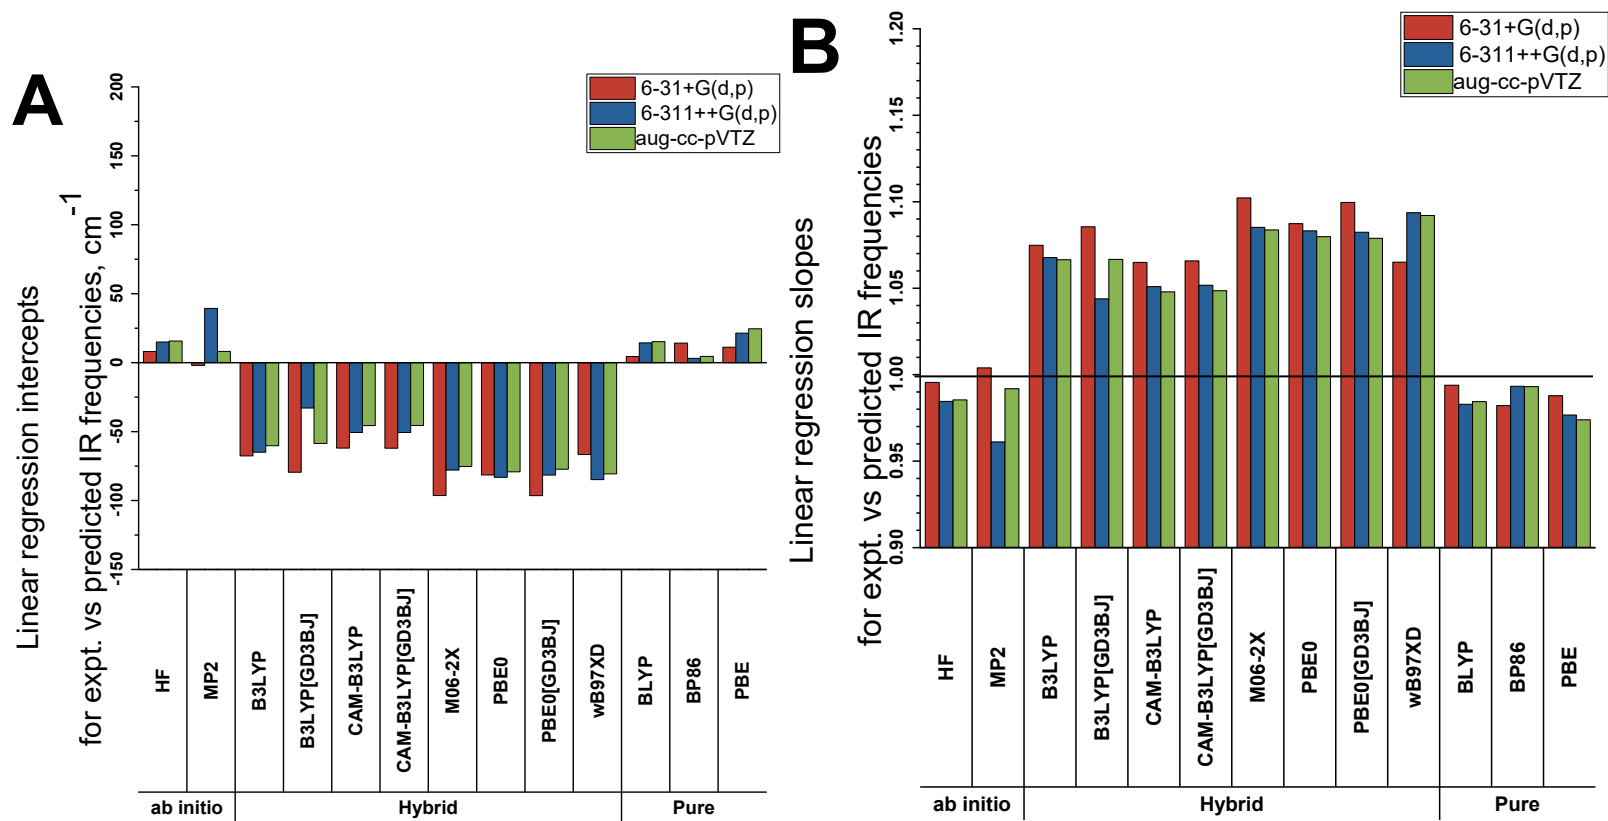

**Figure S3.** Intercepts (A) and slopes (B) obtained upon least-squares linear regressions between experimental and computed IR wavenumbers for **1**.

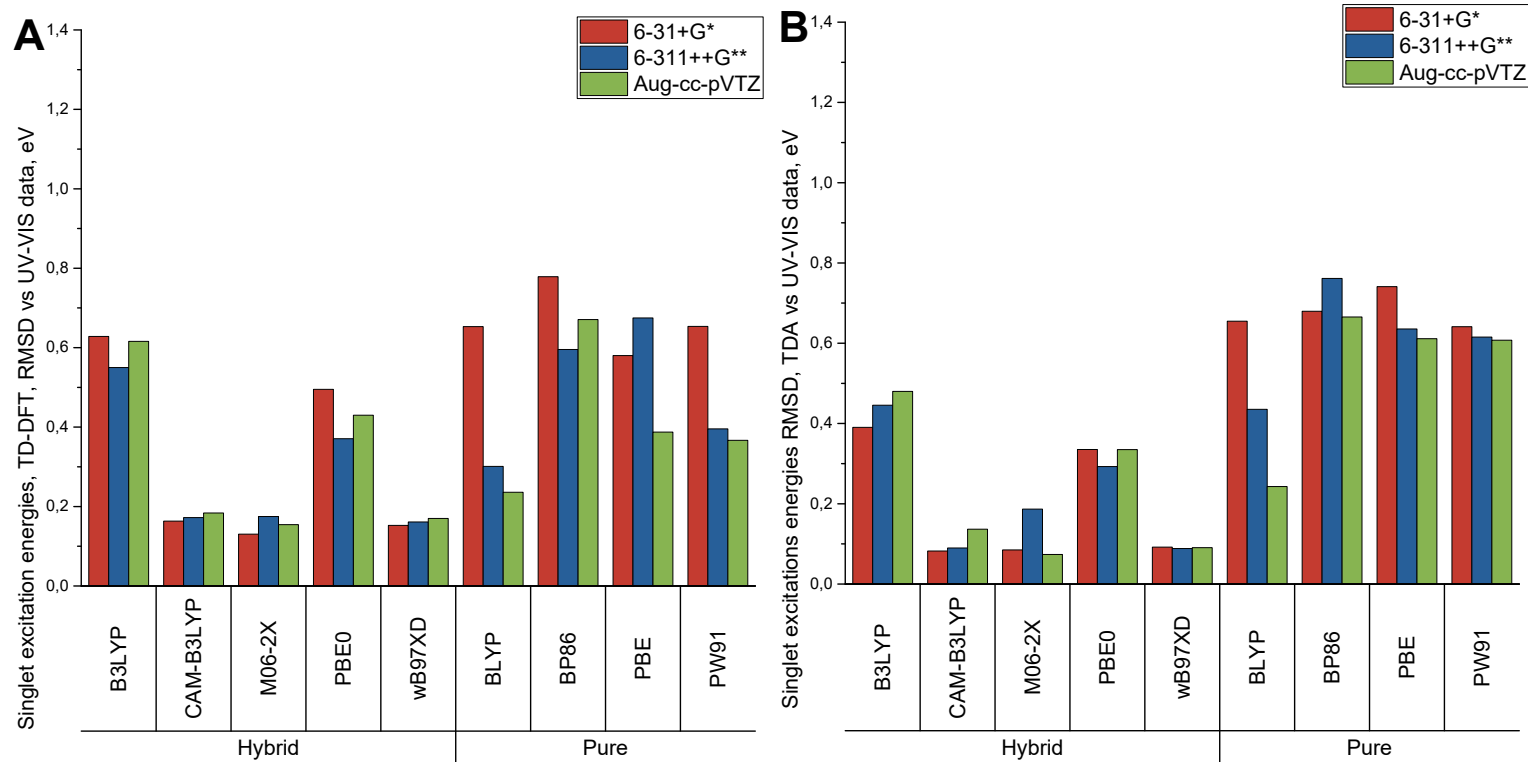

**Figure S4.** Root mean square deviations (eV) of calculated vertical singlet excitation energies vs experimental UV-Vis data for **1**. TD-DFT without (A) and with the Tamm-Dancoff approximation (B).

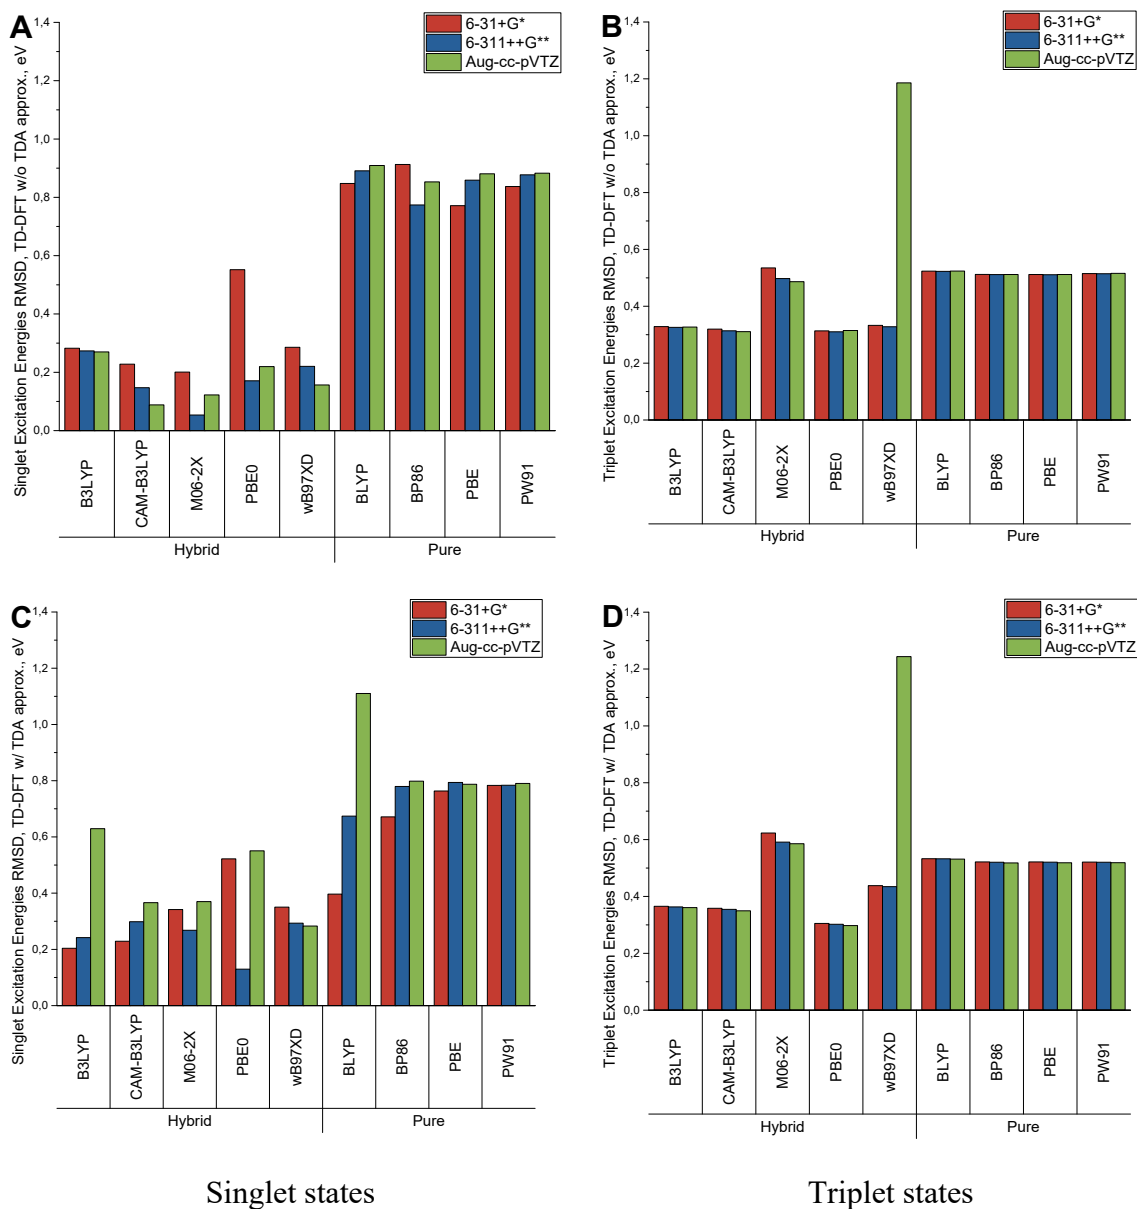

**Figure S5.** Root mean square deviations (in eV) of calculated vertical excitation energies vs electron energy loss spectroscopy data for **1**: singlet (A,C) and triplet states (B,D) computed at TD-DFT level without (A,B) and with the Tamm-Dancoff approximation (C,D).

**Table S2.** Interatomic distances (in units of  $10^{-10}$  m) and bond angles (in degrees) of the optimised geometries of neutral, radical cation and radical anion forms of compounds 1-6. For radical spirenes, the values measured for ring A and B are separated by semi-colons. Level of theory: CCSD / 6-31G\*.

|                      | parameter                       | neutral | cation            | anion             |
|----------------------|---------------------------------|---------|-------------------|-------------------|
| <b>1</b>             | C(sp <sup>3</sup> )-C(α)        | 1.51888 | 1.49455 ; 1.50541 | 1.52226 ; 1.53219 |
|                      | C(α)-C(β)                       | 1.34722 | 1.38504 ; 1.36600 | 1.34905 ; 1.40397 |
|                      | C(β)-C(β')                      | 1.47949 | 1.42882 ; 1.45237 | 1.48391 ; 1.41301 |
|                      | C(β')-C(α)                      | 1.34722 | 1.38504 ; 1.36600 | 1.34905 ; 1.40397 |
|                      | C(α')-C(sp <sup>3</sup> )       | 1.51888 | 1.49455 ; 1.50541 | 1.52778 ; 1.53219 |
|                      | C(α')-C(sp <sup>3</sup> )-C(α') | 102.0   | 103.0 ; 103.5     | 100.2 ; 101.6     |
|                      | C(sp <sup>3</sup> )-C(α)-C(β)   | 109.9   | 106.3 ; 108.7     | 111.4 ; 108.6     |
|                      | C(α)-C(β)-C(β')                 | 109.1   | 109.2 ; 109.5     | 108.5 ; 110.0     |
|                      | C(β)-C(β')-C(α')                | 109.1   | 109.2 ; 109.5     | 108.5 ; 110.0     |
|                      | C(β')-C(α')-C(sp <sup>3</sup> ) | 109.9   | 106.3 ; 108.7     | 111.4 ; 108.6     |
| <b>4</b>             | C(sp <sup>3</sup> )-C(α)        | 1.50849 | 1.49529           | 1.51931           |
|                      | C(α)-C(β)                       | 1.34950 | 1.40136           | 1.40632           |
|                      | C(β)-C(β')                      | 1.47621 | 1.40906           | 1.41404           |
|                      | C(β')-C(α)                      | 1.34950 | 1.40136           | 1.40632           |
|                      | C(α')-C(sp <sup>3</sup> )       | 1.50849 | 1.49529           | 1.51931           |
|                      | C(α')-C(sp <sup>3</sup> )-C(α') | 102.9   | 102.0             | 102.6             |
|                      | C(sp <sup>3</sup> )-C(α)-C(β)   | 109.4   | 109.9             | 108.2             |
|                      | C(α)-C(β)-C(β')                 | 109.1   | 109.1             | 109.9             |
|                      | C(β)-C(β')-C(α')                | 109.1   | 109.1             | 109.9             |
|                      | C(β')-C(α')-C(sp <sup>3</sup> ) | 109.4   | 109.9             | 108.2             |
| <b>2<sup>a</sup></b> | C(sp <sup>3</sup> )-C(α)        | 1.48316 | 1.38080 ; -       | 1.53089 ; 1.46731 |
|                      | C(α)-C(α')                      | 1.32139 | 1.35635 ; -       | 1.31955 ; 1.45692 |
|                      | C(α')-C(sp <sup>3</sup> )       | 1.48316 | 1.38080 ; -       | 1.50653 ; 1.46731 |
|                      | C(α')-C(sp <sup>3</sup> )-C(α)  | 52.9    | 58.8 ; -          | 51.5 ; 59.5       |
|                      | C(sp <sup>3</sup> )-C(α)-C(α')  | 63.5    | 60.6 ; -          | 63.3 ; 60.2       |
|                      | C(α)-C(α')-C(sp <sup>3</sup> )  | 63.5    | 60.6 ; -          | 65.2 ; 60.2       |
| <b>5<sup>a</sup></b> | C(sp <sup>3</sup> )-C(α)        | 1.50940 | (1.38775)         | 1.51690           |
|                      | C(α)-C(α')                      | 1.30035 | (1.36817)         | 1.42722           |
|                      | C(α')-C(sp <sup>3</sup> )       | 1.50940 | (2.35385)         | 1.51690           |
|                      | C(α')-C(sp <sup>3</sup> )-C(α)  | 51.0    | (31.1)            | 56.1              |
|                      | C(sp <sup>3</sup> )-C(α)-C(α')  | 64.5    | (117.3)           | 61.9              |
|                      | C(α)-C(α')-C(sp <sup>3</sup> )  | 64.5    | (31.6)            | 61.9              |
| <b>3</b>             | C(sp <sup>3</sup> )-C(α)        | 1.52512 | 1.49736 ; 1.54099 | 1.50805 ; 1.50953 |
|                      | C(α)-C(β)                       | 1.34807 | 1.37812 ; 1.34755 | 1.35777 ; 1.36647 |
|                      | C(β)-C(v)                       | 1.45666 | 1.41134 ; 1.45960 | 1.44704 ; 1.43501 |
|                      | C(v)-C(v')                      | 1.35792 | 1.39715 ; 1.35549 | 1.35628 ; 1.37357 |

|          |                                                  |         |                   |                   |
|----------|--------------------------------------------------|---------|-------------------|-------------------|
|          | C( $\nu'$ )-C( $\beta'$ )                        | 1.45673 | 1.41812 ; 1.45960 | 1.45202 ; 1.43501 |
|          | C( $\beta'$ )-C( $\alpha'$ )                     | 1.34948 | 1.36882 ; 1.34755 | 1.35429 ; 1.36647 |
|          | C( $\alpha'$ )-C(sp <sup>3</sup> )               | 1.51869 | 1.50331 ; 1.54100 | 1.51100 ; 1.50953 |
|          | C( $\alpha'$ )-C(sp <sup>3</sup> )-C( $\alpha$ ) | 106.1   | 118.9 ; 109.0     | 119.0 ; 119.3     |
|          | C(sp <sup>3</sup> )-C( $\alpha$ )-C( $\beta$ )   | 123.6   | 132.7 ; 125.3     | 132.1 ; 131.7     |
|          | C( $\alpha$ )-C( $\beta$ )-C( $\nu$ )            | 126.0   | 128.9 ; 128.1     | 130.3 ; 130.6     |
|          | C( $\beta$ )-C( $\nu$ )-C( $\nu'$ )              | 125.5   | 128.8 ; 125.6     | 128.0 ; 128.0     |
|          | C( $\nu$ )-C( $\nu'$ )-C( $\beta'$ )             | 125.1   | 128.8 ; 125.6     | 128.4 ; 128.0     |
|          | C( $\nu'$ )-C( $\beta'$ )-C( $\alpha'$ )         | 125.8   | 128.7 ; 128.1     | 130.0 ; 130.6     |
|          | C( $\beta'$ )-C( $\alpha'$ )-C(sp <sup>3</sup> ) | 123.9   | 133.0 ; 125.3     | 132.2 ; 131.7     |
| <b>6</b> | C(sp <sup>3</sup> )-C( $\alpha$ )                | 1.50956 | 1.48919           | 1.51351           |
|          | C( $\alpha$ )-C( $\beta$ )                       | 1.34829 | 1.37147           | 1.38029           |
|          | C( $\beta$ )-C( $\nu$ )                          | 1.46095 | 1.41390           | 1.41861           |
|          | C( $\nu$ )-C( $\nu'$ )                           | 1.35883 | 1.39665           | 1.40596           |
|          | C( $\nu'$ )-C( $\beta'$ )                        | 1.46095 | 1.41390           | 1.41861           |
|          | C( $\beta'$ )-C( $\alpha'$ )                     | 1.34829 | 1.37147           | 1.38029           |
|          | C( $\alpha'$ )-C(sp <sup>3</sup> )               | 1.50956 | 1.48919           | 1.51351           |
|          | C( $\alpha'$ )-C(sp <sup>3</sup> )-C( $\alpha$ ) | 109.1   | 122.5             | 118.9             |
|          | C(sp <sup>3</sup> )-C( $\alpha$ )-C( $\beta$ )   | 121.6   | 131.1             | 127.6             |
|          | C( $\alpha$ )-C( $\beta$ )-C( $\nu$ )            | 124.6   | 128.3             | 130.8             |
|          | C( $\beta$ )-C( $\nu$ )-C( $\nu'$ )              | 125.8   | 129.4             | 127.8             |
|          | C( $\nu$ )-C( $\nu'$ )-C( $\beta'$ )             | 125.8   | 129.4             | 127.8             |
|          | C( $\nu'$ )-C( $\beta'$ )-C( $\alpha'$ )         | 124.6   | 128.3             | 130.8             |
|          | C( $\beta'$ )-C( $\alpha'$ )-C(sp <sup>3</sup> ) | 121.6   | 131.1             | 127.6             |

<sup>a</sup> One ring broken upon geometry optimisation of the radical cation geometry.



**Table S3.** Topological properties for neutral, radical anion and radical cation of molecules **1-6**, computed at the critical points (CPs), *viz.* total electron density ( $\rho_{tot}(\mathbf{r})$ ), spin density ( $\sigma(\mathbf{r})$ ), Lagrangian kinetic energy ( $G(\mathbf{r})$ ), Hamiltonian kinetic energy ( $K(\mathbf{r})$ ), potential energy density ( $V(\mathbf{r})$ ), energy density ( $H(\mathbf{r})$ ), Laplacian of the total electron density ( $\Delta\rho(\mathbf{r})$ ), electron localisation function (ELF( $\mathbf{r}$ )), source unction (SF( $\mathbf{r}$ )), electrostatic potential from both electrons and nuclei (ESP $_{tot}(\mathbf{r})$ ), the ellipticity ( $\varepsilon(\mathbf{r})$ ) and eta index ( $\eta(\mathbf{r})$ ). The location and type of CP is also indicated, *viz.* A (atomic CP), B (bond CP), R (ring CP), and C (cage CP). The asterisk indicates one of the two rings when non-equivalent.

|   | type | location                     | $\rho_{tot}(\mathbf{r})$ | $\sigma(\mathbf{r})$ | $G(\mathbf{r})$ | $K(\mathbf{r})$ | $V(\mathbf{r})$ | $H(\mathbf{r})$ | $\Delta\rho(\mathbf{r})$ | ELF( $\mathbf{r}$ ) | SF( $\mathbf{r}$ ) | ESP( $\mathbf{r}$ ) | $\varepsilon(\mathbf{r})$ | $\eta(\mathbf{r})$ |           |
|---|------|------------------------------|--------------------------|----------------------|-----------------|-----------------|-----------------|-----------------|--------------------------|---------------------|--------------------|---------------------|---------------------------|--------------------|-----------|
| 2 | A    | C(sp3)                       | 1.178E+02                | 0.000000             | 4.761E+00       | 1.088E+05       | -1.088E+05      | -1.088E+05      | -4.352E+05               | 1.000000            | 1.016E+10          | -1.000008           | 0.000008                  | 9.656E+10          |           |
|   | A    | C( $\alpha$ )                | 1.181E+02                | 0.000000             | 4.845E+00       | 1.092E+05       | -1.092E+05      | -1.092E+05      | -4.366E+05               | 1.000000            | 1.240E+04          | -1.000013           | 0.000006                  | 5.328E+06          |           |
|   | A    | C( $\alpha$ )                | 1.181E+02                | 0.000000             | 4.845E+00       | 1.092E+05       | -1.092E+05      | -1.092E+05      | -4.366E+05               | 1.000000            | 1.240E+04          | -1.000013           | 0.000006                  | 5.328E+06          |           |
|   | A    | C( $\alpha$ )                | 1.181E+02                | 0.000000             | 4.845E+00       | 1.092E+05       | -1.092E+05      | -1.092E+05      | -4.366E+05               | 1.000000            | 1.240E+04          | -1.000013           | 0.000006                  | 5.328E+06          |           |
|   | A    | C( $\alpha$ )                | 1.181E+02                | 0.000000             | 4.845E+00       | 1.092E+05       | -1.092E+05      | -1.092E+05      | -4.366E+05               | 1.000000            | 1.240E+04          | -1.000013           | 0.000006                  | 5.328E+06          |           |
|   | A    | H( $\alpha$ )                | 4.096E-01                | 0.000000             | 4.336E-03       | 4.473E+00       | -4.477E+00      | -4.473E+00      | -1.788E+01               | 0.999955            | 3.057E-01          | -1.113901           | 0.000384                  | 2.532E+01          |           |
|   | A    | H( $\alpha$ )                | 4.096E-01                | 0.000000             | 4.336E-03       | 4.473E+00       | -4.477E+00      | -4.473E+00      | -1.788E+01               | 0.999955            | 3.057E-01          | -1.113901           | 0.000384                  | 2.532E+01          |           |
|   | A    | H( $\alpha$ )                | 4.096E-01                | 0.000000             | 4.336E-03       | 4.473E+00       | -4.477E+00      | -4.473E+00      | -1.788E+01               | 0.999955            | 3.057E-01          | -1.113901           | 0.000384                  | 2.532E+01          |           |
|   | A    | H( $\alpha$ )                | 4.096E-01                | 0.000000             | 4.336E-03       | 4.473E+00       | -4.477E+00      | -4.473E+00      | -1.788E+01               | 0.999955            | 3.057E-01          | -1.113901           | 0.000384                  | 2.532E+01          |           |
|   | B    | C(sp3)-C( $\alpha$ )         | 2.518E-01                | 0.000000             | 9.781E-02       | 2.224E-01       | -3.202E-01      | -2.224E-01      | -4.983E-01               | 0.896819            | 2.916E-02          | 1.483421            | 0.271706                  | 7.455E-01          |           |
|   | B    | C( $\alpha$ )-C( $\alpha$ )  | 3.426E-01                | 0.000000             | 1.647E-01       | 4.017E-01       | -5.664E-01      | -4.017E-01      | -9.483E-01               | 0.895306            | 2.834E-02          | 3.054533            | 0.292273                  | 1.024E+00          |           |
|   | B    | C(sp3)-C( $\alpha$ )         | 2.518E-01                | 0.000000             | 9.781E-02       | 2.224E-01       | -3.202E-01      | -2.224E-01      | -4.983E-01               | 0.896819            | 2.916E-02          | 1.483423            | 0.271705                  | 7.455E-01          |           |
|   | B    | C( $\alpha$ )-H( $\alpha$ )  | 2.764E-01                | 0.000000             | 2.748E-02       | 2.862E-01       | -3.137E-01      | -2.862E-01      | -1.035E+00               | 0.993382            | 2.056E-02          | 1.619138            | 0.003768                  | 8.857E-01          |           |
|   | B    | C( $\alpha$ )-H( $\alpha$ )  | 2.764E-01                | 0.000000             | 2.748E-02       | 2.862E-01       | -3.137E-01      | -2.862E-01      | -1.035E+00               | 0.993382            | 2.056E-02          | 1.619138            | 0.003767                  | 8.857E-01          |           |
|   | B    | C(sp3)-C( $\alpha$ )         | 2.518E-01                | 0.000000             | 9.781E-02       | 2.224E-01       | -3.202E-01      | -2.224E-01      | -4.983E-01               | 0.896819            | 2.916E-02          | 1.483421            | 0.271709                  | 7.455E-01          |           |
|   | B    | C( $\alpha$ )-C( $\alpha$ )  | 3.426E-01                | 0.000000             | 1.647E-01       | 4.017E-01       | -5.664E-01      | -4.017E-01      | -9.483E-01               | 0.895306            | 2.834E-02          | 3.054520            | 0.292274                  | 1.024E+00          |           |
|   | B    | C(sp3)-C( $\alpha$ )         | 2.518E-01                | 0.000000             | 9.781E-02       | 2.224E-01       | -3.202E-01      | -2.224E-01      | -4.983E-01               | 0.896819            | 2.916E-02          | 1.483421            | 0.271706                  | 7.455E-01          |           |
|   | B    | C( $\alpha$ )-H( $\alpha$ )  | 2.764E-01                | 0.000000             | 2.748E-02       | 2.862E-01       | -3.137E-01      | -2.862E-01      | -1.035E+00               | 0.993382            | 2.056E-02          | 1.619141            | 0.003768                  | 8.857E-01          |           |
|   | B    | C( $\alpha$ )-H( $\alpha$ )  | 2.764E-01                | 0.000000             | 2.748E-02       | 2.862E-01       | -3.137E-01      | -2.862E-01      | -1.035E+00               | 0.993382            | 2.056E-02          | 1.619138            | 0.003768                  | 8.857E-01          |           |
|   | R    | O                            | 2.119E-01                | 0.000000             | 2.111E-01       | 1.418E-01       | -3.528E-01      | -1.418E-01      | 2.773E-01                | 0.512204            | -1.487E-02         | 0.928977            | -2.152895                 | 7.497E-01          |           |
|   | R    | O                            | 2.119E-01                | 0.000000             | 2.111E-01       | 1.418E-01       | -3.528E-01      | -1.418E-01      | 2.773E-01                | 0.512304            | -1.487E-02         | 0.928976            | -2.152893                 | 7.497E-01          |           |
|   | 2(-) | A                            | C(sp3)                   | 1.179E+02            | -0.011632       | 4.721E+00       | 1.089E+05       | -1.089E+05      | -1.089E+05               | -4.355E+05          | 1.000000           | 2.275E+05           | -1.000013                 | 0.000002           | 1.188E+06 |
|   |      | A                            | C( $\alpha$ )            | 1.181E+02            | 0.073072        | 4.844E+00       | 1.092E+05       | -1.092E+05      | -1.092E+05               | -4.366E+05          | 1.000000           | 1.222E+04           | -1.000014                 | 0.000004           | 4.383E+06 |
|   |      | A                            | C( $\alpha$ )            | 1.181E+02            | -0.141388       | 4.854E+00       | 1.092E+05       | -1.092E+05      | -1.092E+05               | -4.366E+05          | 1.000000           | 1.286E+04           | -1.000013                 | 0.000003           | 5.190E+06 |
|   |      | A                            | H( $\alpha$ )            | 4.142E-01            | 0.010587        | 5.075E-03       | 4.561E+00       | -4.566E+00      | -4.561E+00               | -1.822E+01          | 0.999941           | 3.173E-01           | -1.100397                 | 0.000447           | 2.777E+01 |
|   |      | A                            | H( $\alpha$ )            | 4.136E-01            | -0.013184       | 5.083E-03       | 4.550E+00       | -4.555E+00      | -4.550E+00               | -1.818E+01          | 0.999941           | 3.037E-01           | -1.101544                 | 0.000379           | 2.749E+01 |
|   |      | A                            | C( $\alpha$ )*           | 1.181E+02            | 0.265547        | 4.689E+00       | 1.091E+05       | -1.092E+05      | -1.091E+05               | -4.366E+05          | 1.000000           | 1.211E+04           | -1.000011                 | 0.000005           | 9.990E+05 |
|   |      | A                            | C( $\alpha$ )*           | 1.181E+02            | 0.265548        | 4.689E+00       | 1.091E+05       | -1.092E+05      | -1.091E+05               | -4.366E+05          | 1.000000           | 1.211E+04           | -1.000011                 | 0.000005           | 9.990E+05 |
|   |      | A                            | H( $\alpha$ )*           | 4.168E-01            | 0.010559        | 6.131E-03       | 4.606E+00       | -4.612E+00      | -4.606E+00               | -1.840E+01          | 0.999917           | 3.397E-01           | -1.087135                 | 0.000778           | 3.092E+01 |
| A |      | H( $\alpha$ )*               | 4.168E-01                | 0.010559             | 6.130E-03       | 4.606E+00       | -4.612E+00      | -4.606E+00      | -1.840E+01               | 0.999917            | 3.397E-01          | -1.087135           | 0.000778                  | 3.092E+01          |           |
| B |      | C(sp3)-C( $\alpha$ )         | 2.359E-01                | 0.004201             | 9.390E-02       | 2.061E-01       | -3.000E-01      | -2.061E-01      | -4.489E-01               | 0.883920            | 3.063E-02          | 1.455506            | 0.272266                  | 5.470E-01          |           |
| B |      | C( $\alpha$ )-C( $\alpha$ )  | 3.418E-01                | 0.000387             | 1.609E-01       | 4.018E-01       | -5.626E-01      | -4.018E-01      | -9.636E-01               | 0.899035            | 2.913E-02          | 3.144610            | 0.245331                  | 8.404E-01          |           |
| B |      | C(sp3)-C( $\alpha$ )         | 2.240E-01                | -0.002440            | 9.432E-02       | 1.896E-01       | -2.839E-01      | -1.896E-01      | -3.811E-01               | 0.863419            | 2.345E-02          | 1.396344            | 0.425218                  | 5.249E-01          |           |
| B |      | C( $\alpha$ )-H( $\alpha$ )  | 2.671E-01                | -0.000868            | 3.432E-02       | 2.665E-01       | -3.008E-01      | -2.665E-01      | -9.285E-01               | 0.988525            | 1.818E-02          | 1.535936            | 0.004286                  | 6.957E-01          |           |
| B |      | C( $\alpha$ )-H( $\alpha$ )  | 2.661E-01                | 0.001203             | 3.436E-02       | 2.642E-01       | -2.986E-01      | -2.642E-01      | -9.195E-01               | 0.988346            | 1.886E-02          | 1.522362            | 0.001575                  | 6.942E-01          |           |
| B |      | C(sp3)-C( $\alpha$ )*        | 2.582E-01                | 0.001716             | 1.050E-01       | 2.398E-01       | -3.448E-01      | -2.398E-01      | -5.391E-01               | 0.891325            | 2.731E-02          | 1.734133            | 0.393353                  | 5.338E-01          |           |
| B |      | C( $\alpha$ )-C( $\alpha$ )* | 2.642E-01                | -0.001708            | 1.074E-01       | 2.454E-01       | -3.528E-01      | -2.454E-01      | -5.518E-01               | 0.894229            | 1.667E-02          | 1.672979            | 0.248210                  | 5.031E-01          |           |
| B |      | C(sp3)-C( $\alpha$ )*        | 2.582E-01                | 0.001716             | 1.050E-01       | 2.398E-01       | -3.448E-01      | -2.398E-01      | -5.391E-01               | 0.891325            | 2.731E-02          | 1.734133            | 0.393354                  | 5.338E-01          |           |
| B |      | C( $\alpha$ )-H( $\alpha$ )* | 2.530E-01                | 0.001161             | 4.700E-02       | 2.423E-01       | -2.893E-01      | -2.423E-01      | -7.812E-01               | 0.974619            | 1.681E-02          | 1.456063            | 0.049244                  | 5.927E-01          |           |
| B |      | C( $\alpha$ )-H( $\alpha$ )* | 2.530E-01                | 0.001161             | 4.700E-02       | 2.423E-01       | -2.893E-01      | -2.423E-01      | -7.812E-01               | 0.974619            | 1.681E-02          | 1.456063            | 0.049244                  | 5.927E-01          |           |
| R |      | O                            | 1.991E-01                | 0.000114             | 1.827E-01       | 1.292E-01       | -3.120E-01      | -1.292E-01      | 2.140E-01                | 0.532073            | -1.244E-02         | 1.036682            | -2.300750                 | 5.111E-01          |           |
| R |      | O*                           | 2.112E-01                | -0.000470            | 1.813E-01       | 1.417E-01       | -3.229E-01      | -1.417E-01      | 1.584E-01                | 0.584597            | -7.388E-03         | 1.222011            | -2.545853                 | 4.232E-01          |           |
| 1 | A    | C(sp3)                       | 1.181E+02                | 0.000000             | 4.875E+00       | 1.091E+05       | -1.091E+05      | -1.091E+05      | -4.363E+05               | 1.000000            | 6.425E+10          | -1.000004           | 0.000000                  | 4.075E+12          |           |

**Table S3 (continued)**

|      |   |                                   |           |           |           |            |            |            |            |          |            |           |           |           |
|------|---|-----------------------------------|-----------|-----------|-----------|------------|------------|------------|------------|----------|------------|-----------|-----------|-----------|
|      | A | C( $\alpha$ )                     | 1.182E+02 | 0.000000  | 4.789E+00 | 1.092E+05  | -1.092E+05 | -1.092E+05 | -4.368E+05 | 1.000000 | 1.211E+04  | -1.000009 | 0.000006  | 3.358E+06 |
|      | A | C( $\beta$ )                      | 1.182E+02 | 0.000000  | 4.806E+00 | 1.092E+05  | -1.092E+05 | -1.092E+05 | -4.367E+05 | 1.000000 | 7.830E+03  | -1.000010 | 0.000007  | 3.208E+06 |
|      | A | C( $\beta$ )                      | 1.182E+02 | 0.000000  | 4.806E+00 | 1.092E+05  | -1.092E+05 | -1.092E+05 | -4.367E+05 | 1.000000 | 7.830E+03  | -1.000010 | 0.000007  | 3.208E+06 |
|      | A | C( $\alpha$ )                     | 1.182E+02 | 0.000000  | 4.789E+00 | 1.092E+05  | -1.092E+05 | -1.092E+05 | -4.368E+05 | 1.000000 | 1.211E+04  | -1.000009 | 0.000006  | 3.358E+06 |
|      | A | H( $\alpha$ )                     | 4.188E-01 | 0.000000  | 4.337E-03 | 4.558E+00  | -4.562E+00 | -4.558E+00 | -1.822E+01 | 0.999958 | 3.368E-01  | -1.111237 | 0.001109  | 2.562E+01 |
|      | A | H( $\beta$ )                      | 4.209E-01 | 0.000000  | 4.209E-03 | 4.591E+00  | -4.595E+00 | -4.591E+00 | -1.835E+01 | 0.999961 | 2.281E-01  | -1.109652 | 0.001042  | 2.590E+01 |
|      | A | H( $\beta$ )                      | 4.209E-01 | 0.000000  | 4.209E-03 | 4.591E+00  | -4.595E+00 | -4.591E+00 | -1.835E+01 | 0.999961 | 2.281E-01  | -1.109652 | 0.001042  | 2.590E+01 |
|      | A | H( $\alpha$ )                     | 4.188E-01 | 0.000000  | 4.337E-03 | 4.558E+00  | -4.562E+00 | -4.558E+00 | -1.822E+01 | 0.999958 | 3.368E-01  | -1.111237 | 0.001109  | 2.562E+01 |
|      | A | C( $\alpha$ )                     | 1.182E+02 | 0.000000  | 4.789E+00 | 1.092E+05  | -1.092E+05 | -1.092E+05 | -4.368E+05 | 1.000000 | 1.211E+04  | -1.000009 | 0.000006  | 3.358E+06 |
|      | A | C( $\beta$ )                      | 1.182E+02 | 0.000000  | 4.806E+00 | 1.092E+05  | -1.092E+05 | -1.092E+05 | -4.367E+05 | 1.000000 | 7.830E+03  | -1.000010 | 0.000007  | 3.208E+06 |
|      | A | C( $\beta$ )                      | 1.182E+02 | 0.000000  | 4.806E+00 | 1.092E+05  | -1.092E+05 | -1.092E+05 | -4.367E+05 | 1.000000 | 7.830E+03  | -1.000010 | 0.000007  | 3.208E+06 |
|      | A | C( $\alpha$ )                     | 1.182E+02 | 0.000000  | 4.789E+00 | 1.092E+05  | -1.092E+05 | -1.092E+05 | -4.368E+05 | 1.000000 | 1.211E+04  | -1.000009 | 0.000006  | 3.358E+06 |
|      | A | H( $\alpha$ )                     | 4.188E-01 | 0.000000  | 4.337E-03 | 4.558E+00  | -4.562E+00 | -4.558E+00 | -1.822E+01 | 0.999958 | 3.368E-01  | -1.111237 | 0.001109  | 2.562E+01 |
|      | A | H( $\beta$ )                      | 4.209E-01 | 0.000000  | 4.209E-03 | 4.591E+00  | -4.595E+00 | -4.591E+00 | -1.835E+01 | 0.999961 | 2.281E-01  | -1.109652 | 0.001042  | 2.590E+01 |
|      | A | H( $\beta$ )                      | 4.209E-01 | 0.000000  | 4.209E-03 | 4.591E+00  | -4.595E+00 | -4.591E+00 | -1.835E+01 | 0.999961 | 2.281E-01  | -1.109652 | 0.001042  | 2.590E+01 |
|      | A | H( $\alpha$ )                     | 4.188E-01 | 0.000000  | 4.337E-03 | 4.558E+00  | -4.562E+00 | -4.558E+00 | -1.822E+01 | 0.999958 | 3.368E-01  | -1.111237 | 0.001109  | 2.562E+01 |
|      | B | C(sp <sup>3</sup> )-C( $\alpha$ ) | 2.592E-01 | 0.000000  | 5.562E-02 | 2.263E-01  | -2.819E-01 | -2.263E-01 | -6.826E-01 | 0.967316 | 3.804E-02  | 1.656178  | 0.037706  | 6.545E-01 |
|      | B | C( $\alpha$ )-C( $\beta$ )        | 3.465E-01 | 0.000000  | 1.289E-01 | 3.951E-01  | -5.240E-01 | -3.951E-01 | -1.065E+00 | 0.935503 | 2.399E-02  | 3.286185  | 0.436004  | 9.553E-01 |
|      | B | C( $\beta$ )-C( $\beta$ )         | 2.773E-01 | 0.000000  | 6.229E-02 | 2.557E-01  | -3.180E-01 | -2.557E-01 | -7.737E-01 | 0.967235 | 1.447E-02  | 1.869802  | 0.101512  | 7.145E-01 |
|      | B | C( $\alpha$ )-C( $\beta$ )        | 3.465E-01 | 0.000000  | 1.289E-01 | 3.951E-01  | -5.240E-01 | -3.951E-01 | -1.065E+00 | 0.935503 | 2.399E-02  | 3.286185  | 0.436004  | 9.553E-01 |
|      | B | C(sp <sup>3</sup> )-C( $\alpha$ ) | 2.592E-01 | 0.000000  | 5.562E-02 | 2.263E-01  | -2.819E-01 | -2.263E-01 | -6.826E-01 | 0.967316 | 3.804E-02  | 1.656178  | 0.037706  | 6.545E-01 |
|      | B | C( $\alpha$ )-C( $\beta$ )        | 3.465E-01 | 0.000000  | 1.289E-01 | 3.951E-01  | -5.240E-01 | -3.951E-01 | -1.065E+00 | 0.935503 | 2.399E-02  | 3.286185  | 0.436004  | 9.553E-01 |
|      | B | C( $\beta$ )-C( $\beta$ )         | 2.773E-01 | 0.000000  | 6.229E-02 | 2.557E-01  | -3.180E-01 | -2.557E-01 | -7.737E-01 | 0.967235 | 1.447E-02  | 1.869802  | 0.101512  | 7.145E-01 |
|      | B | C( $\alpha$ )-C( $\beta$ )        | 3.465E-01 | 0.000000  | 1.289E-01 | 3.951E-01  | -5.240E-01 | -3.951E-01 | -1.065E+00 | 0.935503 | 2.399E-02  | 3.286185  | 0.436004  | 9.553E-01 |
|      | B | C(sp <sup>3</sup> )-C( $\alpha$ ) | 2.592E-01 | 0.000000  | 5.562E-02 | 2.263E-01  | -2.819E-01 | -2.263E-01 | -6.826E-01 | 0.967316 | 3.804E-02  | 1.656178  | 0.037706  | 6.545E-01 |
|      | B | C( $\alpha$ )-H( $\alpha$ )       | 2.796E-01 | 0.000000  | 3.070E-02 | 2.872E-01  | -3.179E-01 | -2.872E-01 | -1.026E+00 | 0.992061 | 2.180E-02  | 1.610912  | 0.018425  | 8.571E-01 |
|      | B | C( $\beta$ )-H( $\beta$ )         | 2.794E-01 | 0.000000  | 3.047E-02 | 2.860E-01  | -3.164E-01 | -2.860E-01 | -1.022E+00 | 0.992153 | 1.424E-02  | 1.601391  | 0.014593  | 8.583E-01 |
|      | B | C( $\beta$ )-H( $\beta$ )         | 2.794E-01 | 0.000000  | 3.047E-02 | 2.860E-01  | -3.164E-01 | -2.860E-01 | -1.022E+00 | 0.992153 | 1.424E-02  | 1.601391  | 0.014593  | 8.583E-01 |
|      | B | C( $\alpha$ )-H( $\alpha$ )       | 2.796E-01 | 0.000000  | 3.070E-02 | 2.872E-01  | -3.179E-01 | -2.872E-01 | -1.026E+00 | 0.992061 | 2.180E-02  | 1.610912  | 0.018425  | 8.571E-01 |
|      | B | C(sp <sup>3</sup> )-C( $\alpha$ ) | 2.592E-01 | 0.000000  | 5.562E-02 | 2.263E-01  | -2.819E-01 | -2.263E-01 | -6.826E-01 | 0.967316 | 3.804E-02  | 1.656178  | 0.037706  | 6.545E-01 |
|      | B | C( $\alpha$ )-C( $\beta$ )        | 3.465E-01 | 0.000000  | 1.289E-01 | 3.951E-01  | -5.240E-01 | -3.951E-01 | -1.065E+00 | 0.935503 | 2.399E-02  | 3.286185  | 0.436004  | 9.553E-01 |
|      | B | C( $\beta$ )-C( $\beta$ )         | 2.773E-01 | 0.000000  | 6.229E-02 | 2.557E-01  | -3.180E-01 | -2.557E-01 | -7.737E-01 | 0.967235 | 1.447E-02  | 1.869802  | 0.101512  | 7.145E-01 |
|      | B | C( $\alpha$ )-C( $\beta$ )        | 3.465E-01 | 0.000000  | 1.289E-01 | 3.951E-01  | -5.240E-01 | -3.951E-01 | -1.065E+00 | 0.935503 | 2.399E-02  | 3.286185  | 0.436004  | 9.553E-01 |
|      | B | C(sp <sup>3</sup> )-C( $\alpha$ ) | 2.592E-01 | 0.000000  | 5.562E-02 | 2.263E-01  | -2.819E-01 | -2.263E-01 | -6.826E-01 | 0.967316 | 3.804E-02  | 1.656178  | 0.037706  | 6.545E-01 |
|      | B | C( $\alpha$ )-H( $\alpha$ )       | 2.796E-01 | 0.000000  | 3.070E-02 | 2.872E-01  | -3.179E-01 | -2.872E-01 | -1.026E+00 | 0.992061 | 2.180E-02  | 1.610912  | 0.018425  | 8.571E-01 |
|      | B | C( $\beta$ )-H( $\beta$ )         | 2.794E-01 | 0.000000  | 3.047E-02 | 2.860E-01  | -3.164E-01 | -2.860E-01 | -1.022E+00 | 0.992153 | 1.424E-02  | 1.601391  | 0.014593  | 8.583E-01 |
|      | B | C( $\beta$ )-H( $\beta$ )         | 2.794E-01 | 0.000000  | 3.047E-02 | 2.860E-01  | -3.164E-01 | -2.860E-01 | -1.022E+00 | 0.992153 | 1.424E-02  | 1.601391  | 0.014593  | 8.583E-01 |
|      | B | C( $\alpha$ )-H( $\alpha$ )       | 2.796E-01 | 0.000000  | 3.070E-02 | 2.872E-01  | -3.179E-01 | -2.872E-01 | -1.026E+00 | 0.992061 | 2.180E-02  | 1.610912  | 0.018425  | 8.571E-01 |
|      | R | O                                 | 4.321E-02 | 0.000000  | 7.169E-02 | -8.594E-03 | -6.309E-02 | 8.594E-03  | 3.211E-01  | 0.043444 | -1.074E-02 | 0.219026  | -1.229412 | 2.287E-01 |
|      | R | O                                 | 4.321E-02 | 0.000000  | 7.169E-02 | -8.594E-03 | -6.309E-02 | 8.594E-03  | 3.211E-01  | 0.043444 | -1.074E-02 | 0.219026  | -1.229412 | 2.287E-01 |
| 1(+) | A | C(sp <sup>3</sup> )               | 1.181E+02 | -0.029987 | 4.967E+00 | 1.091E+05  | -1.091E+05 | -1.091E+05 | -4.364E+05 | 1.000000 | 4.754E+06  | -1.000006 | 0.000004  | 2.910E+06 |
|      | A | C( $\alpha$ )                     | 1.183E+02 | 0.093949  | 4.762E+00 | 1.093E+05  | -1.093E+05 | -1.093E+05 | -4.371E+05 | 1.000000 | 1.234E+04  | -1.000021 | 0.000019  | 8.942E+06 |
|      | A | C( $\beta$ )                      | 1.182E+02 | -0.015609 | 4.796E+00 | 1.092E+05  | -1.092E+05 | -1.092E+05 | -4.369E+05 | 1.000000 | 7.844E+03  | -1.000018 | 0.000016  | 6.200E+06 |
|      | A | C( $\beta$ )                      | 1.182E+02 | -0.015609 | 4.796E+00 | 1.092E+05  | -1.092E+05 | -1.092E+05 | -4.369E+05 | 1.000000 | 7.844E+03  | -1.000018 | 0.000016  | 6.200E+06 |
|      | A | C( $\alpha$ )                     | 1.183E+02 | 0.093949  | 4.762E+00 | 1.093E+05  | -1.093E+05 | -1.093E+05 | -4.371E+05 | 1.000000 | 1.234E+04  | -1.000021 | 0.000019  | 8.942E+06 |
|      | A | H( $\alpha$ )                     | 4.076E-01 | -0.014438 | 3.602E-03 | 4.401E+00  | -4.404E+00 | -4.401E+00 | -1.759E+01 | 0.999969 | 3.272E-01  | -1.126435 | 0.000682  | 2.358E+01 |
|      | A | H( $\beta$ )                      | 4.097E-01 | -0.000216 | 3.510E-03 | 4.428E+00  | -4.431E+00 | -4.428E+00 | -1.770E+01 | 0.999971 | 2.207E-01  | -1.124740 | 0.000803  | 2.378E+01 |
|      | A | H( $\beta$ )                      | 4.097E-01 | -0.000216 | 3.510E-03 | 4.428E+00  | -4.431E+00 | -4.428E+00 | -1.770E+01 | 0.999971 | 2.207E-01  | -1.124740 | 0.000803  | 2.378E+01 |
|      | A | H( $\alpha$ )                     | 4.076E-01 | -0.014438 | 3.602E-03 | 4.401E+00  | -4.404E+00 | -4.401E+00 | -1.759E+01 | 0.999969 | 3.272E-01  | -1.126435 | 0.000682  | 2.358E+01 |
|      | A | C( $\alpha$ )*                    | 1.182E+02 | 0.011165  | 4.794E+00 | 1.092E+05  | -1.092E+05 | -1.092E+05 | -4.367E+05 | 1.000000 | 1.220E+04  | -1.000008 | 0.000003  | 2.242E+06 |
|      | A | C( $\beta$ )*                     | 1.182E+02 | 0.007625  | 4.792E+00 | 1.092E+05  | -1.092E+05 | -1.092E+05 | -4.367E+05 | 1.000000 | 7.864E+03  | -1.000014 | 0.000012  | 6.887E+06 |
|      | A | C( $\beta$ )*                     | 1.182E+02 | 0.007624  | 4.792E+00 | 1.092E+05  | -1.092E+05 | -1.092E+05 | -4.367E+05 | 1.000000 | 7.864E+03  | -1.000014 | 0.000012  | 6.887E+06 |
|      | A | C( $\alpha$ )*                    | 1.182E+02 | 0.011165  | 4.794E+00 | 1.092E+05  | -1.092E+05 | -1.092E+05 | -4.367E+05 | 1.000000 | 1.220E+04  | -1.000008 | 0.000003  | 2.242E+06 |
|      | A | H( $\alpha$ )*                    | 4.117E-01 | -0.000183 | 4.310E-03 | 4.457E+00  | -4.461E+00 | -4.457E+00 | -1.781E+01 | 0.999956 | 3.298E-01  | -1.117368 | 0.001287  | 2.474E+01 |
|      | A | H( $\beta$ )*                     | 4.140E-01 | -0.001480 | 3.733E-03 | 4.491E+00  | -4.495E+00 | -4.491E+00 | -1.795E+01 | 0.999968 | 2.241E-01  | -1.118911 | 0.000873  | 2.454E+01 |
|      | A | H( $\beta$ )*                     | 4.140E-01 | -0.001480 | 3.733E-03 | 4.491E+00  | -4.495E+00 | -4.491E+00 | -1.795E+01 | 0.999968 | 2.241E-01  | -1.118911 | 0.000873  | 2.454E+01 |
|      | A | H( $\alpha$ )*                    | 4.117E-01 | -0.000183 | 4.310E-03 | 4.457E+00  | -4.461E+00 | -4.457E+00 | -1.781E+01 | 0.999956 | 3.298E-01  | -1.117368 | 0.001287  | 2.474E+01 |
|      | B | C(sp <sup>3</sup> )-C( $\alpha$ ) | 2.740E-01 | -0.002428 | 6.254E-02 | 2.544E-01  | -3.169E-01 | -2.544E-01 | -7.673E-01 | 0.965740 | 4.589E-02  | 1.804235  | 0.033246  | 9.311E-01 |
|      | B | C( $\alpha$ )-C( $\beta$ )        | 3.330E-01 | -0.003662 | 9.818E-02 | 3.606E-01  | -4.588E-01 | -3.606E-01 | -1.050E+00 | 0.956357 | 2.386E-02  | 2.603862  | 0.184666  | 1.124E+00 |
|      | B | C( $\beta$ )-H( $\beta$ )         | 3.076E-01 | 0.001431  | 8.082E-02 | 3.087E-01  | -3.895E-01 | -3.087E-01 | -9.114E-01 | 0.961227 | 1.707E-02  | 2.167691  | 0.157831  | 1.035E+00 |

Table S3 (continued)

|      |   |                              |           |           |           |            |            |            |            |          |            |           |           |            |
|------|---|------------------------------|-----------|-----------|-----------|------------|------------|------------|------------|----------|------------|-----------|-----------|------------|
|      | B | C( $\alpha$ )-C( $\beta$ )   | 3.330E-01 | -0.003662 | 9.818E-02 | 3.606E-01  | -4.588E-01 | -3.606E-01 | -1.050E+00 | 0.956357 | 2.386E-02  | 2.603860  | 0.184666  | 1.124E+00  |
|      | B | C(sp3)-C( $\alpha$ )         | 2.740E-01 | -0.002428 | 6.254E-02 | 2.544E-01  | -3.169E-01 | -2.544E-01 | -7.673E-01 | 0.965740 | 4.589E-02  | 1.804233  | 0.033246  | 9.311E-01  |
|      | B | C( $\alpha$ )-H( $\alpha$ )  | 2.862E-01 | -0.002509 | 2.237E-02 | 3.070E-01  | -3.293E-01 | -3.070E-01 | -1.138E+00 | 0.996108 | 2.410E-02  | 1.681024  | 0.001634  | 1.090E+00  |
|      | B | C( $\beta$ )-H( $\beta$ )    | 2.861E-01 | -0.000029 | 2.230E-02 | 3.049E-01  | -3.272E-01 | -3.049E-01 | -1.131E+00 | 0.996102 | 1.564E-02  | 1.669114  | 0.000690  | 1.084E+00  |
|      | B | C( $\beta$ )-H( $\beta$ )    | 2.861E-01 | -0.000029 | 2.230E-02 | 3.049E-01  | -3.272E-01 | -3.049E-01 | -1.131E+00 | 0.996102 | 1.564E-02  | 1.669114  | 0.000690  | 1.084E+00  |
|      | B | C( $\alpha$ )-H( $\alpha$ )  | 2.862E-01 | -0.002509 | 2.237E-02 | 3.070E-01  | -3.293E-01 | -3.070E-01 | -1.138E+00 | 0.996108 | 2.410E-02  | 1.681024  | 0.001633  | 1.090E+00  |
|      | B | C(sp3)-C( $\alpha$ )*        | 2.633E-01 | 0.001593  | 5.981E-02 | 2.356E-01  | -2.954E-01 | -2.356E-01 | -7.032E-01 | 0.964224 | 3.794E-02  | 1.722503  | 0.041894  | 8.762E-01  |
|      | B | C( $\alpha$ )-C( $\beta$ )*  | 3.364E-01 | -0.000376 | 1.181E-01 | 3.711E-01  | -4.892E-01 | -3.711E-01 | -1.012E+00 | 0.939912 | 2.296E-02  | 2.896941  | 0.388767  | 1.087E+00  |
|      | B | C( $\beta$ )-C( $\beta$ )*   | 2.944E-01 | -0.000204 | 6.755E-02 | 2.851E-01  | -3.526E-01 | -2.851E-01 | -8.702E-01 | 0.968409 | 1.635E-02  | 2.025931  | 0.089609  | 9.325E-01  |
|      | B | C( $\alpha$ )-C( $\beta$ )*  | 3.364E-01 | -0.000376 | 1.181E-01 | 3.711E-01  | -4.892E-01 | -3.711E-01 | -1.012E+00 | 0.939912 | 2.296E-02  | 2.896941  | 0.388767  | 1.087E+00  |
|      | B | C(sp3)-C( $\alpha$ )*        | 2.633E-01 | 0.001593  | 5.981E-02 | 2.356E-01  | -2.954E-01 | -2.356E-01 | -7.032E-01 | 0.964224 | 3.794E-02  | 1.722503  | 0.041894  | 8.762E-01  |
|      | B | C( $\alpha$ )-H( $\alpha$ )* | 2.810E-01 | 0.000015  | 2.848E-02 | 2.920E-01  | -3.204E-01 | -2.920E-01 | -1.054E+00 | 0.993273 | 2.238E-02  | 1.641488  | 0.025968  | 1.027E+00  |
|      | B | C( $\beta$ )-H( $\beta$ )*   | 2.838E-01 | -0.000182 | 2.515E-02 | 2.973E-01  | -3.225E-01 | -2.973E-01 | -1.089E+00 | 0.994916 | 1.514E-02  | 1.638425  | 0.005558  | 1.020E+00  |
|      | B | C( $\beta$ )-H( $\beta$ )*   | 2.838E-01 | -0.000182 | 2.515E-02 | 2.973E-01  | -3.225E-01 | -2.973E-01 | -1.089E+00 | 0.994916 | 1.514E-02  | 1.638425  | 0.005558  | 1.020E+00  |
|      | B | C( $\alpha$ )-H( $\alpha$ )* | 2.810E-01 | 0.000015  | 2.848E-02 | 2.920E-01  | -3.204E-01 | -2.920E-01 | -1.054E+00 | 0.993273 | 2.238E-02  | 1.641488  | 0.025968  | 1.027E+00  |
|      | R | O                            | 4.497E-02 | -0.000063 | 7.605E-02 | -8.596E-03 | -6.746E-02 | -8.596E-03 | 3.386E-01  | 0.044047 | -1.140E-02 | 0.222788  | -1.234877 | 4.704E-01  |
|      | R | O*                           | 4.397E-02 | -0.000054 | 7.371E-02 | -8.521E-03 | -6.519E-02 | 8.521E-03  | 3.289E-01  | 0.043520 | -1.111E-02 | 0.220304  | -1.224049 | 4.094E-01  |
| 1(-) | A | C(sp3)                       | 1.180E+02 | -0.064974 | 4.779E+00 | 1.091E+05  | -1.091E+05 | -1.091E+05 | -4.362E+05 | 1.000000 | 2.288E+05  | -1.000006 | 0.000005  | 2.786E+06  |
|      | A | C( $\alpha$ )                | 1.182E+02 | 0.067056  | 4.756E+00 | 1.092E+05  | -1.092E+05 | -1.092E+05 | -4.370E+05 | 1.000000 | 1.162E+04  | -1.000013 | 0.000010  | 3.458E+06  |
|      | A | C( $\beta$ )                 | 1.181E+02 | -0.005268 | 4.805E+00 | 1.092E+05  | -1.092E+05 | -1.092E+05 | -4.366E+05 | 1.000000 | 7.664E+03  | -1.000007 | 0.000003  | 2.209E+06  |
|      | A | C( $\beta$ )                 | 1.181E+02 | -0.009547 | 4.806E+00 | 1.091E+05  | -1.092E+05 | -1.091E+05 | -4.366E+05 | 1.000000 | 7.817E+03  | -1.000007 | 0.000003  | 2.226E+06  |
|      | A | C( $\alpha$ )                | 1.182E+02 | 0.085639  | 4.749E+00 | 1.093E+05  | -1.093E+05 | -1.093E+05 | -4.370E+05 | 1.000000 | 1.256E+04  | -1.000013 | 0.000010  | 3.287E+06  |
|      | A | H( $\alpha$ )                | 4.238E-01 | -0.002554 | 4.372E-03 | 4.635E+00  | -4.639E+00 | -4.635E+00 | -1.852E+01 | 0.999959 | 3.550E-01  | -1.105928 | 0.000889  | 2.649E+01  |
|      | A | H( $\beta$ )                 | 4.247E-01 | 0.002285  | 4.649E-03 | 4.657E+00  | -4.661E+00 | -4.657E+00 | -1.861E+01 | 0.999954 | 2.312E-01  | -1.100854 | 0.001193  | 2.750E+01  |
|      | A | H( $\beta$ )                 | 4.250E-01 | 0.001123  | 4.637E-03 | 4.659E+00  | -4.663E+00 | -4.659E+00 | -1.862E+01 | 0.999955 | 2.274E-01  | -1.101028 | 0.001177  | 2.746E+01  |
|      | A | H( $\alpha$ )                | 4.244E-01 | -0.001610 | 4.359E-03 | 4.643E+00  | -4.648E+00 | -4.643E+00 | -1.856E+01 | 0.999960 | 3.329E-01  | -1.105766 | 0.000914  | 2.653E+01  |
|      | A | C( $\alpha$ )*               | 1.180E+02 | 0.148378  | 4.847E+00 | 1.091E+05  | -1.091E+05 | -1.091E+05 | -4.363E+05 | 1.000000 | 1.197E+04  | -1.000011 | 0.000004  | 2.105E+06  |
|      | A | C( $\beta$ )*                | 1.181E+02 | -0.026182 | 4.780E+00 | 1.091E+05  | -1.091E+05 | -1.091E+05 | -4.364E+05 | 1.000000 | 7.724E+03  | -1.000005 | 0.000002  | 2.650E+06  |
|      | A | C( $\beta$ )*                | 1.181E+02 | -0.026182 | 4.780E+00 | 1.091E+05  | -1.091E+05 | -1.091E+05 | -4.364E+05 | 1.000000 | 7.724E+03  | -1.000005 | 0.000002  | 2.650E+06  |
|      | A | C( $\alpha$ )*               | 1.180E+02 | 0.148378  | 4.847E+00 | 1.091E+05  | -1.091E+05 | -1.091E+05 | -4.363E+05 | 1.000000 | 1.197E+04  | -1.000011 | 0.000004  | 2.105E+06  |
|      | A | H( $\alpha$ )*               | 4.224E-01 | -0.014550 | 5.818E-03 | 4.626E+00  | -4.632E+00 | -4.626E+00 | -1.848E+01 | 0.999928 | 3.414E-01  | -1.096891 | 0.001941  | 2.831E+01  |
|      | A | H( $\beta$ )*                | 4.262E-01 | 0.000497  | 4.961E-03 | 4.682E+00  | -4.687E+00 | -4.682E+00 | -1.871E+01 | 0.999949 | 2.305E-01  | -1.096434 | 0.001389  | 2.845E+01  |
|      | A | H( $\beta$ )*                | 4.262E-01 | 0.000497  | 4.961E-03 | 4.682E+00  | -4.687E+00 | -4.682E+00 | -1.871E+01 | 0.999949 | 2.305E-01  | -1.096434 | 0.001389  | 2.845E+01  |
|      | A | H( $\alpha$ )*               | 4.224E-01 | -0.014550 | 5.818E-03 | 4.626E+00  | -4.632E+00 | -4.626E+00 | -1.848E+01 | 0.999928 | 3.414E-01  | -1.096891 | 0.001941  | 2.831E+01  |
|      | B | C(sp3)-C( $\alpha$ )         | 2.600E-01 | 0.003362  | 5.765E-02 | 2.323E-01  | -2.900E-01 | -2.323E-01 | -6.986E-01 | 0.965435 | 3.782E-02  | 1.710511  | 0.048206  | 4.774E-01  |
|      | B | C( $\alpha$ )-C( $\beta$ )   | 3.442E-01 | 0.000266  | 1.283E-01 | 3.911E-01  | -5.194E-01 | -3.911E-01 | -1.051E+00 | 0.934704 | 2.298E-02  | 3.244663  | 0.426713  | 7.883E-01  |
|      | B | C( $\beta$ )-C( $\beta$ )    | 2.725E-01 | 0.000221  | 6.283E-02 | 2.483E-01  | -3.112E-01 | -2.483E-01 | -7.420E-01 | 0.964765 | 1.368E-02  | 1.845027  | 0.124786  | 5.443E-01  |
|      | B | C( $\alpha$ )-C( $\beta$ )   | 3.439E-01 | 0.000175  | 1.284E-01 | 3.906E-01  | -5.190E-01 | -3.906E-01 | -1.049E+00 | 0.934401 | 2.389E-02  | 3.240985  | 0.423792  | 7.882E-01  |
|      | B | C(sp3)-C( $\alpha$ )         | 2.565E-01 | 0.003641  | 5.855E-02 | 2.275E-01  | -2.861E-01 | -2.275E-01 | -6.758E-01 | 0.962920 | 4.352E-02  | 1.668701  | 0.048805  | 4.717E-01  |
|      | B | C( $\alpha$ )-H( $\alpha$ )  | 2.775E-01 | 0.000202  | 3.254E-02 | 2.823E-01  | -3.149E-01 | -2.823E-01 | -9.992E-01 | 0.990864 | 2.058E-02  | 1.582605  | 0.006125  | 6.933E-01  |
|      | B | C( $\beta$ )-H( $\beta$ )    | 2.727E-01 | 0.000049  | 3.569E-02 | 2.737E-01  | -3.094E-01 | -2.737E-01 | -9.521E-01 | 0.988377 | 1.308E-02  | 1.571728  | 0.024346  | 7.076E-01  |
|      | B | C( $\beta$ )-H( $\beta$ )    | 2.723E-01 | 0.000075  | 3.577E-02 | 2.731E-01  | -3.088E-01 | -2.731E-01 | -9.492E-01 | 0.988281 | 1.328E-02  | 1.569353  | 0.025160  | 7.065E-01  |
|      | B | C( $\alpha$ )-H( $\alpha$ )  | 2.773E-01 | 0.000029  | 3.246E-02 | 2.821E-01  | -3.145E-01 | -2.821E-01 | -9.985E-01 | 0.990892 | 2.211E-02  | 1.582095  | 0.005182  | 6.929E-01  |
|      | B | C(sp3)-C( $\alpha$ )*        | 2.465E-01 | 0.000420  | 5.849E-02 | 2.107E-01  | -2.692E-01 | -2.107E-01 | -6.089E-01 | 0.957815 | 3.191E-02  | 1.638631  | 0.094703  | 4.312E-01  |
|      | B | C( $\alpha$ )-C( $\beta$ )*  | 3.084E-01 | -0.000287 | 9.808E-02 | 3.163E-01  | -4.143E-01 | -3.163E-01 | -8.727E-01 | 0.944478 | 1.953E-02  | 2.451946  | 0.351068  | 6.123E-01  |
|      | B | C( $\beta$ )-C( $\beta$ )*   | 3.054E-01 | -0.001174 | 9.301E-02 | 3.091E-01  | -4.021E-01 | -3.091E-01 | -8.643E-01 | 0.948136 | 1.587E-02  | 2.333204  | 0.299596  | 5.983E-01  |
|      | B | C( $\alpha$ )-C( $\beta$ )*  | 3.084E-01 | -0.000287 | 9.808E-02 | 3.163E-01  | -4.143E-01 | -3.163E-01 | -8.727E-01 | 0.944478 | 1.953E-02  | 2.451944  | 0.351068  | 6.123E-01  |
|      | B | C(sp3)-C( $\alpha$ )*        | 2.465E-01 | 0.000420  | 5.849E-02 | 2.107E-01  | -2.692E-01 | -2.107E-01 | -6.089E-01 | 0.957815 | 3.191E-02  | 1.638634  | 0.094703  | 4.312E-01  |
|      | B | C( $\alpha$ )-H( $\alpha$ )* | 2.666E-01 | 0.000285  | 4.492E-02 | 2.655E-01  | -3.104E-01 | -2.655E-01 | -8.822E-01 | 0.980414 | 1.890E-02  | 1.587521  | 0.089416  | 6.439E-01  |
|      | B | C( $\beta$ )-H( $\beta$ )*   | 2.681E-01 | -0.000006 | 3.971E-02 | 2.671E-01  | -3.068E-01 | -2.671E-01 | -9.097E-01 | 0.984837 | 1.265E-02  | 1.566798  | 0.038757  | 6.530E-01  |
|      | B | C( $\beta$ )-H( $\beta$ )*   | 2.681E-01 | -0.000006 | 3.971E-02 | 2.671E-01  | -3.068E-01 | -2.671E-01 | -9.097E-01 | 0.984837 | 1.265E-02  | 1.566799  | 0.038757  | 6.530E-01  |
|      | B | C( $\alpha$ )-H( $\alpha$ )* | 2.666E-01 | 0.000285  | 4.492E-02 | 2.655E-01  | -3.104E-01 | -2.655E-01 | -8.822E-01 | 0.980414 | 1.890E-02  | 1.587521  | 0.089416  | 6.439E-01  |
|      | R | O                            | 4.255E-02 | -0.000063 | 7.026E-02 | -8.615E-03 | -6.165E-02 | 8.615E-03  | 3.155E-01  | 0.042981 | -1.035E-02 | 0.209297  | -1.242907 | 5.494E-02  |
|      | R | O*                           | 4.075E-02 | 0.000063  | 6.576E-02 | -8.720E-03 | -5.704E-02 | 8.720E-03  | 2.979E-01  | 0.044248 | -9.889E-03 | 0.222872  | -1.225920 | -2.235E-03 |
| 3    | A | C(sp3)                       | 1.180E+02 | 0.000000  | 4.855E+00 | 1.090E+05  | -1.091E+05 | -1.090E+05 | -4.362E+05 | 1.000000 | 2.714E+04  | -1.000001 | 0.000001  | 1.852E+07  |
|      | A | C( $\alpha$ )                | 1.182E+02 | 0.000000  | 4.738E+00 | 1.093E+05  | -1.093E+05 | -1.093E+05 | -4.370E+05 | 1.000000 | 1.437E+04  | -1.000012 | 0.000009  | 3.748E+06  |

**Table S3 (continued)**

|   |             |           |          |           |            |            |            |            |          |            |           |           |           |
|---|-------------|-----------|----------|-----------|------------|------------|------------|------------|----------|------------|-----------|-----------|-----------|
| A | C(β)        | 1.181E+02 | 0.000000 | 4.842E+00 | 1.091E+05  | -1.091E+05 | -1.091E+05 | -4.365E+05 | 1.000000 | 8.666E+03  | -1.000008 | 0.000006  | 3.482E+06 |
| A | C(γ)        | 1.181E+02 | 0.000000 | 4.793E+00 | 1.092E+05  | -1.092E+05 | -1.092E+05 | -4.366E+05 | 1.000000 | 6.905E+03  | -1.000011 | 0.000009  | 4.778E+06 |
| A | C(γ)        | 1.181E+02 | 0.000000 | 4.810E+00 | 1.092E+05  | -1.092E+05 | -1.092E+05 | -4.366E+05 | 1.000000 | 6.342E+03  | -1.000009 | 0.000007  | 4.165E+06 |
| A | C(β)        | 1.181E+02 | 0.000000 | 4.827E+00 | 1.092E+05  | -1.092E+05 | -1.092E+05 | -4.366E+05 | 1.000000 | 6.765E+03  | -1.000009 | 0.000007  | 3.977E+06 |
| A | C(α)        | 1.182E+02 | 0.000000 | 4.756E+00 | 1.092E+05  | -1.092E+05 | -1.092E+05 | -4.369E+05 | 1.000000 | 9.272E+03  | -1.000011 | 0.000008  | 3.780E+06 |
| A | C(α)        | 1.182E+02 | 0.000000 | 4.738E+00 | 1.093E+05  | -1.093E+05 | -1.093E+05 | -4.370E+05 | 1.000000 | 1.437E+04  | -1.000012 | 0.000009  | 3.748E+06 |
| A | C(β)        | 1.181E+02 | 0.000000 | 4.842E+00 | 1.091E+05  | -1.091E+05 | -1.091E+05 | -4.365E+05 | 1.000000 | 8.666E+03  | -1.000008 | 0.000006  | 3.482E+06 |
| A | C(γ)        | 1.181E+02 | 0.000000 | 4.793E+00 | 1.092E+05  | -1.092E+05 | -1.092E+05 | -4.366E+05 | 1.000000 | 6.905E+03  | -1.000011 | 0.000009  | 4.778E+06 |
| A | C(γ)        | 1.181E+02 | 0.000000 | 4.810E+00 | 1.092E+05  | -1.092E+05 | -1.092E+05 | -4.366E+05 | 1.000000 | 6.342E+03  | -1.000009 | 0.000007  | 4.165E+06 |
| A | C(α)        | 1.182E+02 | 0.000000 | 4.756E+00 | 1.092E+05  | -1.092E+05 | -1.092E+05 | -4.369E+05 | 1.000000 | 9.272E+03  | -1.000011 | 0.000008  | 3.780E+06 |
| A | H(α)        | 4.227E-01 | 0.000000 | 4.457E-03 | 4.604E+00  | -4.608E+00 | -4.604E+00 | -1.840E+01 | 0.999957 | 3.667E-01  | -1.111116 | 0.001528  | 2.577E+01 |
| A | H(β)        | 4.227E-01 | 0.000000 | 4.432E-03 | 4.618E+00  | -4.623E+00 | -4.618E+00 | -1.846E+01 | 0.999958 | 2.529E-01  | -1.106645 | 0.001518  | 2.653E+01 |
| A | H(γ)        | 4.243E-01 | 0.000000 | 4.421E-03 | 4.635E+00  | -4.639E+00 | -4.635E+00 | -1.852E+01 | 0.999959 | 2.009E-01  | -1.107269 | 0.001550  | 2.643E+01 |
| A | H(γ)        | 4.247E-01 | 0.000000 | 4.333E-03 | 4.640E+00  | -4.644E+00 | -4.640E+00 | -1.854E+01 | 0.999960 | 2.183E-01  | -1.107639 | 0.001476  | 2.638E+01 |
| A | H(β)        | 4.230E-01 | 0.000000 | 4.378E-03 | 4.621E+00  | -4.625E+00 | -4.621E+00 | -1.847E+01 | 0.999959 | 2.073E-01  | -1.107031 | 0.001483  | 2.647E+01 |
| A | H(α)        | 4.237E-01 | 0.000000 | 4.567E-03 | 4.628E+00  | -4.633E+00 | -4.628E+00 | -1.849E+01 | 0.999956 | 2.750E-01  | -1.107422 | 0.001584  | 2.642E+01 |
| A | H(α)        | 4.227E-01 | 0.000000 | 4.457E-03 | 4.604E+00  | -4.608E+00 | -4.604E+00 | -1.840E+01 | 0.999957 | 3.667E-01  | -1.111116 | 0.001528  | 2.577E+01 |
| A | H(β)        | 4.227E-01 | 0.000000 | 4.432E-03 | 4.618E+00  | -4.623E+00 | -4.618E+00 | -1.846E+01 | 0.999958 | 2.529E-01  | -1.106645 | 0.001518  | 2.653E+01 |
| A | H(γ)        | 4.247E-01 | 0.000000 | 4.333E-03 | 4.640E+00  | -4.644E+00 | -4.640E+00 | -1.854E+01 | 0.999960 | 2.183E-01  | -1.107639 | 0.001476  | 2.638E+01 |
| A | H(γ)        | 4.243E-01 | 0.000000 | 4.421E-03 | 4.635E+00  | -4.639E+00 | -4.635E+00 | -1.852E+01 | 0.999959 | 2.009E-01  | -1.107269 | 0.001550  | 2.643E+01 |
| A | H(β)        | 4.230E-01 | 0.000000 | 4.378E-03 | 4.621E+00  | -4.625E+00 | -4.621E+00 | -1.847E+01 | 0.999959 | 2.073E-01  | -1.107031 | 0.001483  | 2.647E+01 |
| A | H(α)        | 4.237E-01 | 0.000000 | 4.567E-03 | 4.628E+00  | -4.633E+00 | -4.628E+00 | -1.849E+01 | 0.999956 | 2.750E-01  | -1.107422 | 0.001584  | 2.642E+01 |
| B | C(sp3)-C(α) | 2.622E-01 | 0.000000 | 5.315E-02 | 2.301E-01  | -2.832E-01 | -2.301E-01 | -7.076E-01 | 0.971131 | 2.360E-02  | 1.701458  | 0.036371  | 6.600E-01 |
| B | C(α)-C(β)   | 3.444E-01 | 0.000000 | 1.234E-01 | 3.900E-01  | -5.134E-01 | -3.900E-01 | -1.066E+00 | 0.939396 | 1.972E-02  | 3.268941  | 0.418817  | 9.570E-01 |
| B | C(β)-C(γ)   | 2.885E-01 | 0.000000 | 6.439E-02 | 2.747E-01  | -3.391E-01 | -2.747E-01 | -8.411E-01 | 0.969276 | 1.550E-02  | 2.023587  | 0.099611  | 7.558E-01 |
| B | C(γ)-C(γ)   | 3.386E-01 | 0.000000 | 1.179E-01 | 3.770E-01  | -4.948E-01 | -3.770E-01 | -1.036E+00 | 0.941372 | 1.623E-02  | 3.060379  | 0.391425  | 9.386E-01 |
| B | C(β)-C(γ)   | 2.883E-01 | 0.000000 | 6.457E-02 | 2.742E-01  | -3.388E-01 | -2.742E-01 | -8.385E-01 | 0.969032 | 1.304E-02  | 2.022332  | 0.103106  | 7.581E-01 |
| B | C(α)-C(β)   | 3.454E-01 | 0.000000 | 1.241E-01 | 3.924E-01  | -5.165E-01 | -3.924E-01 | -1.073E+00 | 0.939289 | 2.796E-02  | 3.312633  | 0.420164  | 9.542E-01 |
| B | C(sp3)-C(α) | 2.578E-01 | 0.000000 | 5.225E-02 | 2.234E-01  | -2.757E-01 | -2.234E-01 | -6.847E-01 | 0.970525 | 4.296E-02  | 1.655653  | 0.035034  | 6.481E-01 |
| B | C(sp3)-C(α) | 2.578E-01 | 0.000000 | 5.225E-02 | 2.234E-01  | -2.757E-01 | -2.234E-01 | -6.847E-01 | 0.970525 | 4.296E-02  | 1.655653  | 0.035034  | 6.481E-01 |
| B | C(α)-C(β)   | 3.454E-01 | 0.000000 | 1.241E-01 | 3.924E-01  | -5.165E-01 | -3.924E-01 | -1.073E+00 | 0.939289 | 2.796E-02  | 3.312633  | 0.420164  | 9.542E-01 |
| B | C(β)-C(γ)   | 2.885E-01 | 0.000000 | 6.439E-02 | 2.747E-01  | -3.391E-01 | -2.747E-01 | -8.411E-01 | 0.969276 | 1.550E-02  | 2.023587  | 0.099611  | 7.558E-01 |
| B | C(γ)-C(γ)   | 3.386E-01 | 0.000000 | 1.179E-01 | 3.770E-01  | -4.948E-01 | -3.770E-01 | -1.036E+00 | 0.941372 | 1.623E-02  | 3.060379  | 0.391425  | 9.386E-01 |
| B | C(β)-C(γ)   | 2.883E-01 | 0.000000 | 6.457E-02 | 2.742E-01  | -3.388E-01 | -2.742E-01 | -8.385E-01 | 0.969032 | 1.304E-02  | 2.022332  | 0.103106  | 7.581E-01 |
| B | C(α)-C(β)   | 3.444E-01 | 0.000000 | 1.234E-01 | 3.900E-01  | -5.134E-01 | -3.900E-01 | -1.066E+00 | 0.939396 | 1.972E-02  | 3.268941  | 0.418817  | 9.570E-01 |
| B | C(sp3)-C(α) | 2.622E-01 | 0.000000 | 5.315E-02 | 2.301E-01  | -2.832E-01 | -2.301E-01 | -7.076E-01 | 0.971131 | 2.360E-02  | 1.701458  | 0.036371  | 6.600E-01 |
| B | C(α)-H(α)   | 2.786E-01 | 0.000000 | 3.312E-02 | 2.833E-01  | -3.164E-01 | -2.833E-01 | -1.001E+00 | 0.990657 | 1.677E-02  | 1.580688  | 0.023164  | 8.478E-01 |
| B | C(β)-H(β)   | 2.776E-01 | 0.000000 | 3.325E-02 | 2.820E-01  | -3.152E-01 | -2.820E-01 | -9.949E-01 | 0.990479 | 1.238E-02  | 1.576943  | 0.021405  | 8.435E-01 |
| B | C(γ)-H(γ)   | 2.787E-01 | 0.000000 | 3.326E-02 | 2.836E-01  | -3.169E-01 | -2.836E-01 | -1.002E+00 | 0.990590 | 1.195E-02  | 1.582881  | 0.022878  | 8.432E-01 |
| B | C(γ)-H(γ)   | 2.792E-01 | 0.000000 | 3.259E-02 | 2.847E-01  | -3.173E-01 | -2.847E-01 | -1.008E+00 | 0.991021 | 1.309E-02  | 1.581775  | 0.018388  | 8.430E-01 |
| B | C(β)-H(β)   | 2.770E-01 | 0.000000 | 3.375E-02 | 2.810E-01  | -3.147E-01 | -2.810E-01 | -9.890E-01 | 0.990124 | 1.527E-02  | 1.575780  | 0.024303  | 8.379E-01 |
| B | C(α)-H(α)   | 2.786E-01 | 0.000000 | 3.312E-02 | 2.833E-01  | -3.164E-01 | -2.833E-01 | -1.001E+00 | 0.990657 | 1.677E-02  | 1.580688  | 0.023164  | 8.478E-01 |
| B | C(α)-H(α)   | 2.817E-01 | 0.000000 | 3.125E-02 | 2.897E-01  | -3.210E-01 | -2.897E-01 | -1.034E+00 | 0.991977 | 2.425E-02  | 1.601940  | 0.020335  | 8.412E-01 |
| B | C(β)-H(β)   | 2.770E-01 | 0.000000 | 3.375E-02 | 2.810E-01  | -3.147E-01 | -2.810E-01 | -9.890E-01 | 0.990124 | 1.527E-02  | 1.575780  | 0.024303  | 8.379E-01 |
| B | C(γ)-H(γ)   | 2.787E-01 | 0.000000 | 3.326E-02 | 2.836E-01  | -3.169E-01 | -2.836E-01 | -1.002E+00 | 0.990590 | 1.195E-02  | 1.582881  | 0.022878  | 8.432E-01 |
| B | C(γ)-H(γ)   | 2.792E-01 | 0.000000 | 3.259E-02 | 2.847E-01  | -3.173E-01 | -2.847E-01 | -1.008E+00 | 0.991021 | 1.309E-02  | 1.581775  | 0.018388  | 8.430E-01 |
| B | C(β)-H(β)   | 2.776E-01 | 0.000000 | 3.325E-02 | 2.820E-01  | -3.152E-01 | -2.820E-01 | -9.949E-01 | 0.990479 | 1.238E-02  | 1.576943  | 0.021405  | 8.435E-01 |
| B | C(β)-H(β)   | 2.776E-01 | 0.000000 | 3.325E-02 | 2.820E-01  | -3.152E-01 | -2.820E-01 | -9.949E-01 | 0.990479 | 1.238E-02  | 1.576943  | 0.021405  | 8.435E-01 |
| B | C(α)-H(α)   | 2.817E-01 | 0.000000 | 3.125E-02 | 2.897E-01  | -3.210E-01 | -2.897E-01 | -1.034E+00 | 0.991977 | 2.425E-02  | 1.601940  | 0.020335  | 8.412E-01 |
| R | O           | 8.549E-03 | 0.000000 | 7.174E-03 | -1.457E-03 | -5.716E-03 | 1.457E-03  | 3.452E-02  | 0.020005 | -1.050E-03 | 0.015463  | -1.218138 | 2.836E-02 |
| R | O           | 8.549E-03 | 0.000000 | 7.174E-03 | -1.457E-03 | -5.716E-03 | 1.457E-03  | 3.452E-02  | 0.020005 | -1.050E-03 | 0.015463  | -1.218138 | 2.836E-02 |
| R | O           | 8.580E-03 | 0.000000 | 6.864E-03 | -1.339E-03 | -5.525E-03 | 1.339E-03  | 3.281E-02  | 0.022060 | -1.067E-03 | 0.037767  | -1.783253 | 2.177E-02 |
| R | O           | 8.580E-03 | 0.000000 | 6.864E-03 | -1.339E-03 | -5.525E-03 | 1.339E-03  | 3.281E-02  | 0.022060 | -1.067E-03 | 0.037767  | -1.783253 | 2.177E-02 |
| R | O           | 1.148E-02 | 0.000000 | 1.341E-02 | -3.603E-03 | -9.805E-03 | 3.603E-03  | 6.805E-02  | 0.015407 | -1.680E-03 | 0.094174  | -1.173767 | 6.556E-02 |
| R | O           | 1.148E-02 | 0.000000 | 1.341E-02 | -3.603E-03 | -9.805E-03 | 3.603E-03  | 6.805E-02  | 0.015407 | -1.680E-03 | 0.094174  | -1.173767 | 6.556E-02 |
| C | K           | 8.545E-03 | 0.000000 | 7.309E-03 | -1.533E-03 | -5.776E-03 | 1.533E-03  | 3.537E-02  | 0.019249 | -1.128E-03 | 0.017484  | -0.721218 | 3.239E-02 |

Table S3 (continued)

|      |    |                                             |           |           |           |            |            |            |            |          |            |           |           |           |
|------|----|---------------------------------------------|-----------|-----------|-----------|------------|------------|------------|------------|----------|------------|-----------|-----------|-----------|
|      | C  | K                                           | 8.545E-03 | 0.000000  | 7.309E-03 | -1.533E-03 | -5.776E-03 | 1.533E-03  | 3.537E-02  | 0.019249 | -1.128E-03 | 0.017484  | -0.721218 | 3.239E-02 |
|      | B  | C( $\alpha$ )-[C( $\gamma$ )-C( $\gamma$ )] | 8.609E-03 | 0.000000  | 6.315E-03 | -1.109E-03 | -5.206E-03 | 1.109E-03  | 2.969E-02  | 0.026242 | -8.816E-04 | 0.060965  | 1.191818  | 1.242E-02 |
|      | B  | C( $\alpha$ )-[C( $\gamma$ )-C( $\gamma$ )] | 8.609E-03 | 0.000000  | 6.315E-03 | -1.109E-03 | -5.206E-03 | 1.109E-03  | 2.969E-02  | 0.026242 | -8.816E-04 | 0.060965  | 1.191818  | 1.242E-02 |
| 3(+) | A  | C(sp <sup>3</sup> )                         | 1.180E+02 | -0.060898 | 4.867E+00 | 1.091E+05  | -1.091E+05 | -1.091E+05 | -4.362E+05 | 1.000000 | 4.090E+04  | -1.000003 | 0.000002  | 4.124E+06 |
|      | A  | C( $\alpha$ )                               | 1.182E+02 | 0.128222  | 4.838E+00 | 1.093E+05  | -1.093E+05 | -1.093E+05 | -4.370E+05 | 1.000000 | 1.004E+04  | -1.000013 | 0.000011  | 6.275E+06 |
|      | A  | C( $\beta$ )                                | 1.181E+02 | -0.101810 | 4.888E+00 | 1.092E+05  | -1.092E+05 | -1.092E+05 | -4.366E+05 | 1.000000 | 6.532E+03  | -1.000011 | 0.000008  | 3.687E+06 |
|      | A  | C( $\gamma$ )                               | 1.182E+02 | 0.081553  | 4.816E+00 | 1.092E+05  | -1.092E+05 | -1.092E+05 | -4.367E+05 | 1.000000 | 5.626E+03  | -1.000017 | 0.000015  | 5.582E+06 |
|      | A  | C( $\gamma'$ )                              | 1.182E+02 | -0.005162 | 4.755E+00 | 1.092E+05  | -1.092E+05 | -1.092E+05 | -4.369E+05 | 1.000000 | 5.973E+03  | -1.000021 | 0.000020  | 7.198E+06 |
|      | A  | C( $\beta'$ )                               | 1.181E+02 | -0.033016 | 4.863E+00 | 1.092E+05  | -1.092E+05 | -1.092E+05 | -4.366E+05 | 1.000000 | 8.056E+03  | -1.000012 | 0.000010  | 4.059E+06 |
|      | A  | C( $\alpha'$ )                              | 1.183E+02 | 0.091364  | 4.744E+00 | 1.093E+05  | -1.093E+05 | -1.093E+05 | -4.372E+05 | 1.000000 | 1.731E+04  | -1.000024 | 0.000022  | 5.500E+06 |
|      | A  | H( $\alpha$ )                               | 4.179E-01 | -0.018240 | 4.289E-03 | 4.535E+00  | -4.539E+00 | -4.535E+00 | -1.812E+01 | 0.999960 | 2.972E-01  | -1.116512 | 0.001460  | 2.503E+01 |
|      | A  | H( $\beta$ )                                | 4.178E-01 | 0.011052  | 4.102E-03 | 4.533E+00  | -4.537E+00 | -4.533E+00 | -1.812E+01 | 0.999963 | 2.021E-01  | -1.117148 | 0.001671  | 2.491E+01 |
|      | A  | H( $\gamma$ )                               | 4.176E-01 | -0.011629 | 3.883E-03 | 4.529E+00  | -4.533E+00 | -4.529E+00 | -1.810E+01 | 0.999967 | 1.758E-01  | -1.120057 | 0.001451  | 2.453E+01 |
|      | A  | H( $\gamma'$ )                              | 4.175E-01 | -0.000825 | 3.686E-03 | 4.526E+00  | -4.529E+00 | -4.526E+00 | -1.809E+01 | 0.999970 | 1.859E-01  | -1.121662 | 0.001329  | 2.433E+01 |
|      | A  | H( $\beta'$ )                               | 4.171E-01 | 0.002589  | 4.051E-03 | 4.522E+00  | -4.526E+00 | -4.522E+00 | -1.807E+01 | 0.999963 | 2.439E-01  | -1.118556 | 0.001702  | 2.472E+01 |
|      | A  | H( $\alpha'$ )                              | 4.169E-01 | -0.013569 | 4.313E-03 | 4.505E+00  | -4.509E+00 | -4.505E+00 | -1.800E+01 | 0.999959 | 4.436E-01  | -1.125574 | 0.001110  | 2.381E+01 |
|      | A  | C( $\alpha$ )*                              | 1.182E+02 | 0.070050  | 4.766E+00 | 1.092E+05  | -1.092E+05 | -1.092E+05 | -4.368E+05 | 1.000000 | 1.091E+04  | -1.000009 | 0.000003  | 2.006E+06 |
|      | A  | C( $\beta$ )*                               | 1.182E+02 | -0.011900 | 4.813E+00 | 1.092E+05  | -1.092E+05 | -1.092E+05 | -4.366E+05 | 1.000000 | 7.171E+03  | -1.000012 | 0.000010  | 4.874E+06 |
|      | A  | C( $\gamma$ )*                              | 1.182E+02 | 0.001119  | 4.819E+00 | 1.092E+05  | -1.092E+05 | -1.092E+05 | -4.367E+05 | 1.000000 | 6.099E+03  | -1.000011 | 0.000009  | 3.521E+06 |
|      | A  | C( $\gamma'$ )*                             | 1.182E+02 | 0.001119  | 4.819E+00 | 1.092E+05  | -1.092E+05 | -1.092E+05 | -4.367E+05 | 1.000000 | 6.099E+03  | -1.000011 | 0.000009  | 3.521E+06 |
|      | A  | C( $\beta$ )*                               | 1.182E+02 | -0.011900 | 4.813E+00 | 1.092E+05  | -1.092E+05 | -1.092E+05 | -4.366E+05 | 1.000000 | 7.171E+03  | -1.000012 | 0.000010  | 4.874E+06 |
|      | A  | C( $\alpha$ )*                              | 1.182E+02 | 0.070050  | 4.766E+00 | 1.092E+05  | -1.092E+05 | -1.092E+05 | -4.368E+05 | 1.000000 | 1.091E+04  | -1.000009 | 0.000003  | 2.006E+06 |
|      | A  | H( $\alpha$ )*                              | 4.187E-01 | -0.002592 | 4.567E-03 | 4.552E+00  | -4.557E+00 | -4.552E+00 | -1.819E+01 | 0.999954 | 3.124E-01  | -1.112689 | 0.001774  | 2.559E+01 |
|      | A  | H( $\beta$ )*                               | 4.187E-01 | 0.002449  | 4.121E-03 | 4.557E+00  | -4.561E+00 | -4.557E+00 | -1.821E+01 | 0.999962 | 2.171E-01  | -1.113497 | 0.001424  | 2.545E+01 |
|      | A  | H( $\gamma$ )*                              | 4.197E-01 | -0.000004 | 4.200E-03 | 4.564E+00  | -4.568E+00 | -4.564E+00 | -1.824E+01 | 0.999961 | 1.929E-01  | -1.113631 | 0.001524  | 2.541E+01 |
|      | A  | H( $\gamma'$ )*                             | 4.197E-01 | -0.000004 | 4.200E-03 | 4.564E+00  | -4.568E+00 | -4.564E+00 | -1.824E+01 | 0.999961 | 1.929E-01  | -1.113631 | 0.001524  | 2.541E+01 |
|      | A  | H( $\beta$ )*                               | 4.187E-01 | 0.002449  | 4.121E-03 | 4.557E+00  | -4.561E+00 | -4.557E+00 | -1.821E+01 | 0.999962 | 2.171E-01  | -1.113497 | 0.001424  | 2.545E+01 |
|      | A  | H( $\alpha$ )*                              | 4.187E-01 | -0.002592 | 4.567E-03 | 4.552E+00  | -4.557E+00 | -4.552E+00 | -1.819E+01 | 0.999954 | 3.124E-01  | -1.112689 | 0.001774  | 2.559E+01 |
|      | B  | C(sp <sup>3</sup> )-C( $\alpha$ )           | 2.698E-01 | -0.002797 | 5.504E-02 | 2.431E-01  | -2.982E-01 | -2.431E-01 | -7.523E-01 | 0.971935 | 2.959E-02  | 1.776263  | 0.033255  | 8.713E-01 |
|      | B  | C( $\alpha$ )-C( $\beta$ )                  | 3.317E-01 | -0.003475 | 9.883E-02 | 3.605E-01  | -4.593E-01 | -3.605E-01 | -1.047E+00 | 0.955230 | 2.675E-02  | 2.725426  | 0.204580  | 1.119E+00 |
|      | B  | C( $\beta$ )-C( $\gamma$ )                  | 3.096E-01 | -0.000067 | 7.927E-02 | 3.162E-01  | -3.954E-01 | -3.162E-01 | -9.475E-01 | 0.963503 | 1.355E-02  | 2.327507  | 0.141616  | 1.036E+00 |
|      | B  | C( $\gamma$ )-C( $\gamma'$ )                | 3.240E-01 | -0.003047 | 8.686E-02 | 3.421E-01  | -4.290E-01 | -3.421E-01 | -1.021E+00 | 0.962329 | 1.394E-02  | 2.488990  | 0.150459  | 1.089E+00 |
|      | B  | C( $\beta'$ )-C( $\gamma'$ )                | 3.145E-01 | 0.001485  | 8.223E-02 | 3.245E-01  | -4.067E-01 | -3.245E-01 | -9.690E-01 | 0.962658 | 1.574E-02  | 2.374630  | 0.152299  | 1.059E+00 |
|      | B  | C( $\alpha'$ )-C( $\beta'$ )                | 3.344E-01 | -0.002434 | 1.048E-01 | 3.668E-01  | -4.716E-01 | -3.668E-01 | -1.048E+00 | 0.951352 | 1.948E-02  | 2.851641  | 0.264183  | 1.114E+00 |
|      | B  | C(sp <sup>3</sup> )-C( $\alpha'$ )          | 2.721E-01 | -0.002332 | 5.953E-02 | 2.534E-01  | -3.129E-01 | -2.534E-01 | -7.753E-01 | 0.968159 | 1.143E-01  | 1.842036  | 0.021846  | 9.145E-01 |
|      | B  | C( $\alpha$ )-H( $\alpha$ )                 | 2.839E-01 | -0.002027 | 2.942E-02 | 2.953E-01  | -3.248E-01 | -2.953E-01 | -1.064E+00 | 0.993123 | 1.955E-02  | 1.609963  | 0.012887  | 1.017E+00 |
|      | B  | C( $\beta$ )-H( $\beta$ )                   | 2.842E-01 | 0.001249  | 2.876E-02 | 2.963E-01  | -3.250E-01 | -2.963E-01 | -1.070E+00 | 0.993409 | 1.308E-02  | 1.625874  | 0.020970  | 1.022E+00 |
|      | B  | C( $\gamma$ )-H( $\gamma$ )                 | 2.867E-01 | -0.001506 | 2.637E-02 | 3.022E-01  | -3.286E-01 | -3.022E-01 | -1.103E+00 | 0.994619 | 1.166E-02  | 1.636442  | 0.008876  | 1.044E+00 |
|      | B  | C( $\gamma'$ )-H( $\gamma'$ )               | 2.880E-01 | -0.000102 | 2.473E-02 | 3.055E-01  | -3.302E-01 | -3.055E-01 | -1.123E+00 | 0.995320 | 1.257E-02  | 1.644087  | 0.001010  | 1.056E+00 |
|      | B  | C( $\beta'$ )-H( $\beta'$ )                 | 2.851E-01 | 0.000310  | 2.785E-02 | 2.984E-01  | -3.262E-01 | -2.984E-01 | -1.082E+00 | 0.993863 | 1.613E-02  | 1.632463  | 0.019085  | 1.034E+00 |
|      | B  | C( $\alpha'$ )-H( $\alpha'$ )               | 2.913E-01 | -0.002174 | 2.500E-02 | 3.143E-01  | -3.393E-01 | -3.143E-01 | -1.157E+00 | 0.995416 | 3.363E-02  | 1.675157  | 0.004465  | 1.048E+00 |
|      | B  | C(sp <sup>3</sup> )-C( $\alpha$ )*          | 2.479E-01 | 0.007179  | 5.111E-02 | 2.101E-01  | -2.612E-01 | -2.101E-01 | -6.359E-01 | 0.968088 | 2.745E-02  | 1.612335  | 0.045172  | 7.969E-01 |
|      | B  | C( $\alpha$ )-C( $\beta$ )*                 | 3.447E-01 | 0.000608  | 1.244E-01 | 3.916E-01  | -5.160E-01 | -3.916E-01 | -1.069E+00 | 0.938634 | 2.187E-02  | 3.313591  | 0.417980  | 1.107E+00 |
|      | B  | C( $\beta$ )-C( $\gamma$ )*                 | 2.876E-01 | 0.000287  | 6.264E-02 | 2.729E-01  | -3.356E-01 | -2.729E-01 | -8.412E-01 | 0.970573 | 1.315E-02  | 2.001452  | 0.081703  | 8.959E-01 |
|      | B  | C( $\gamma$ )-C( $\gamma'$ )*               | 3.406E-01 | -0.000117 | 1.187E-01 | 3.810E-01  | -4.997E-01 | -3.810E-01 | -1.049E+00 | 0.941692 | 1.510E-02  | 3.101194  | 0.383923  | 1.082E+00 |
|      | B  | C( $\beta$ )-C( $\gamma$ )*                 | 2.876E-01 | 0.000287  | 6.264E-02 | 2.729E-01  | -3.356E-01 | -2.729E-01 | -8.412E-01 | 0.970573 | 1.315E-02  | 2.001452  | 0.081703  | 8.959E-01 |
|      | B  | C( $\alpha$ )-C( $\beta$ )*                 | 3.447E-01 | 0.000608  | 1.244E-01 | 3.916E-01  | -5.160E-01 | -3.916E-01 | -1.069E+00 | 0.938634 | 2.187E-02  | 3.313591  | 0.417980  | 1.107E+00 |
|      | B  | C(sp <sup>3</sup> )-C( $\alpha$ )*          | 2.479E-01 | 0.007179  | 5.111E-02 | 2.101E-01  | -2.612E-01 | -2.101E-01 | -6.359E-01 | 0.968088 | 2.745E-02  | 1.612335  | 0.045172  | 7.969E-01 |
|      | B  | C( $\alpha$ )-H( $\alpha$ )*                | 2.807E-01 | 0.000057  | 3.159E-02 | 2.887E-01  | -3.203E-01 | -2.887E-01 | -1.028E+00 | 0.991703 | 2.008E-02  | 1.611056  | 0.031083  | 9.892E-01 |
|      | B  | C( $\beta$ )-H( $\beta$ )*                  | 2.814E-01 | 0.000313  | 2.968E-02 | 2.903E-01  | -3.200E-01 | -2.903E-01 | -1.043E+00 | 0.992732 | 1.374E-02  | 1.599306  | 0.014496  | 9.772E-01 |
|      | B  | C( $\gamma$ )-H( $\gamma$ )*                | 2.822E-01 | -0.000026 | 2.995E-02 | 2.915E-01  | -3.214E-01 | -2.915E-01 | -1.046E+00 | 0.992666 | 1.209E-02  | 1.609970  | 0.019749  | 9.746E-01 |
|      | B  | C( $\gamma'$ )-H( $\gamma'$ )*              | 2.822E-01 | -0.000026 | 2.995E-02 | 2.915E-01  | -3.214E-01 | -2.915E-01 | -1.046E+00 | 0.992666 | 1.209E-02  | 1.609970  | 0.019749  | 9.746E-01 |
|      | B  | C( $\beta$ )-H( $\beta$ )*                  | 2.814E-01 | 0.000313  | 2.968E-02 | 2.903E-01  | -3.200E-01 | -2.903E-01 | -1.043E+00 | 0.992732 | 1.374E-02  | 1.599306  | 0.014496  | 9.772E-01 |
|      | B  | C( $\alpha$ )-H( $\alpha$ )*                | 2.807E-01 | 0.000057  | 3.159E-02 | 2.887E-01  | -3.203E-01 | -2.887E-01 | -1.028E+00 | 0.991703 | 2.008E-02  | 1.611056  | 0.031083  | 9.892E-01 |
| R    | O  |                                             | 8.393E-03 | 0.000034  | 1.042E-02 | -3.155E-03 | -7.264E-03 | 3.155E-03  | 5.430E-02  | 0.009026 | -1.379E-03 | 0.136422  | -1.151433 | 2.762E-01 |
| R    | O* |                                             | 1.051E-02 | -0.000071 | 1.233E-02 | -3.380E-03 | -8.952E-03 | 3.380E-03  | 6.285E-02  | 0.013588 | -1.471E-03 | 0.095966  | -1.168198 | 2.122E-01 |

Table S3 (continued)

|      |   |                                              |           |           |           |            |            |            |            |          |            |           |           |            |
|------|---|----------------------------------------------|-----------|-----------|-----------|------------|------------|------------|------------|----------|------------|-----------|-----------|------------|
|      | R | O*                                           | 9.009E-03 | -0.000030 | 8.325E-03 | -2.123E-03 | -6.202E-03 | 2.123E-03  | 4.179E-02  | 0.017733 | -1.121E-03 | 0.131694  | -1.525733 | 2.034E-01  |
|      | R | O*                                           | 9.009E-03 | -0.000030 | 8.325E-03 | -2.123E-03 | -6.202E-03 | 2.123E-03  | 4.179E-02  | 0.017733 | -1.121E-03 | 0.131694  | -1.525733 | 2.034E-01  |
|      | C | K*                                           | 7.663E-03 | -0.000071 | 8.118E-03 | -1.943E-03 | -6.175E-03 | 1.943E-03  | 4.024E-02  | 0.010952 | -1.218E-03 | 0.212055  | -0.279564 | 2.272E-01  |
|      | B | H( $\alpha$ )-[C( $\gamma$ )-C( $\gamma$ )]* | 1.170E-02 | -0.000132 | 8.221E-03 | -1.494E-03 | -6.727E-03 | 1.494E-03  | 3.886E-02  | 0.042339 | -8.468E-04 | 0.183468  | 0.945565  | 1.906E-01  |
| 3(-) | A | C(sp3)                                       | 1.180E+02 | -0.047942 | 4.847E+00 | 1.091E+05  | -1.091E+05 | -1.091E+05 | -4.362E+05 | 1.000000 | 8.911E+05  | -1.000003 | 0.000003  | 4.281E+06  |
|      | A | C( $\alpha$ )                                | 1.183E+02 | 0.140162  | 4.796E+00 | 1.093E+05  | -1.093E+05 | -1.093E+05 | -4.371E+05 | 1.000000 | 1.204E+04  | -1.000012 | 0.000009  | 1.424E+07  |
|      | A | C( $\beta$ )                                 | 1.181E+02 | -0.115670 | 4.867E+00 | 1.091E+05  | -1.091E+05 | -1.091E+05 | -4.365E+05 | 1.000000 | 6.980E+03  | -1.000005 | 0.000002  | 2.954E+06  |
|      | A | C( $\gamma$ )                                | 1.181E+02 | 0.144443  | 4.879E+00 | 1.091E+05  | -1.091E+05 | -1.091E+05 | -4.365E+05 | 1.000000 | 5.559E+03  | -1.000007 | 0.000004  | 3.554E+06  |
|      | A | C( $\gamma$ )                                | 1.181E+02 | -0.142867 | 4.891E+00 | 1.091E+05  | -1.091E+05 | -1.091E+05 | -4.365E+05 | 1.000000 | 5.569E+03  | -1.000006 | 0.000003  | 3.864E+06  |
|      | A | C( $\beta$ )                                 | 1.181E+02 | 0.131738  | 4.866E+00 | 1.091E+05  | -1.091E+05 | -1.091E+05 | -4.365E+05 | 1.000000 | 7.048E+03  | -1.000006 | 0.000003  | 2.931E+06  |
|      | A | C( $\alpha$ )                                | 1.182E+02 | -0.087168 | 4.809E+00 | 1.093E+05  | -1.093E+05 | -1.093E+05 | -4.370E+05 | 1.000000 | 1.235E+04  | -1.000009 | 0.000007  | 2.468E+07  |
|      | A | H( $\alpha$ )                                | 4.258E-01 | -0.015585 | 4.553E-03 | 4.651E+00  | -4.655E+00 | -4.651E+00 | -1.858E+01 | 0.999957 | 3.622E-01  | -1.107513 | 0.001491  | 2.633E+01  |
|      | A | H( $\beta$ )                                 | 4.283E-01 | 0.011906  | 4.799E-03 | 4.698E+00  | -4.702E+00 | -4.698E+00 | -1.877E+01 | 0.999953 | 2.234E-01  | -1.100291 | 0.001881  | 2.776E+01  |
|      | A | H( $\gamma$ )                                | 4.290E-01 | -0.017376 | 4.659E-03 | 4.707E+00  | -4.712E+00 | -4.707E+00 | -1.881E+01 | 0.999956 | 1.818E-01  | -1.100951 | 0.001717  | 2.764E+01  |
|      | A | H( $\gamma$ )                                | 4.288E-01 | 0.016465  | 4.706E-03 | 4.703E+00  | -4.707E+00 | -4.703E+00 | -1.879E+01 | 0.999955 | 1.820E-01  | -1.100811 | 0.001764  | 2.765E+01  |
|      | A | H( $\beta$ )                                 | 4.287E-01 | -0.013847 | 4.743E-03 | 4.703E+00  | -4.708E+00 | -4.703E+00 | -1.879E+01 | 0.999954 | 2.258E-01  | -1.100320 | 0.001826  | 2.777E+01  |
|      | A | H( $\alpha$ )                                | 4.250E-01 | 0.014265  | 4.743E-03 | 4.638E+00  | -4.643E+00 | -4.638E+00 | -1.853E+01 | 0.999953 | 3.687E-01  | -1.107421 | 0.001655  | 2.632E+01  |
|      | A | C( $\alpha$ )*                               | 1.181E+02 | 0.110860  | 4.858E+00 | 1.092E+05  | -1.092E+05 | -1.092E+05 | -4.367E+05 | 1.000000 | 1.218E+04  | -1.000004 | 0.000003  | 3.221E+06  |
|      | A | C( $\beta$ )*                                | 1.181E+02 | -0.063292 | 4.771E+00 | 1.091E+05  | -1.091E+05 | -1.091E+05 | -4.365E+05 | 1.000000 | 7.006E+03  | -1.000008 | 0.000005  | 4.188E+06  |
|      | A | C( $\gamma$ )*                               | 1.181E+02 | 0.037984  | 4.834E+00 | 1.091E+05  | -1.091E+05 | -1.091E+05 | -4.363E+05 | 1.000000 | 5.562E+03  | -1.000003 | 0.000001  | 3.266E+06  |
|      | A | C( $\gamma$ )*                               | 1.181E+02 | 0.037984  | 4.834E+00 | 1.091E+05  | -1.091E+05 | -1.091E+05 | -4.363E+05 | 1.000000 | 5.562E+03  | -1.000003 | 0.000001  | 3.266E+06  |
|      | A | C( $\beta$ )*                                | 1.181E+02 | -0.063292 | 4.771E+00 | 1.091E+05  | -1.091E+05 | -1.091E+05 | -4.365E+05 | 1.000000 | 7.006E+03  | -1.000008 | 0.000005  | 4.188E+06  |
|      | A | C( $\alpha$ )*                               | 1.181E+02 | 0.110860  | 4.858E+00 | 1.092E+05  | -1.092E+05 | -1.092E+05 | -4.367E+05 | 1.000000 | 1.218E+04  | -1.000004 | 0.000003  | 3.221E+06  |
|      | A | H( $\alpha$ )*                               | 4.283E-01 | -0.014952 | 5.500E-03 | 4.683E+00  | -4.689E+00 | -4.683E+00 | -1.871E+01 | 0.999939 | 3.674E-01  | -1.099945 | 0.002097  | 2.776E+01  |
|      | A | H( $\beta$ )*                                | 4.311E-01 | 0.005533  | 4.768E-03 | 4.739E+00  | -4.744E+00 | -4.739E+00 | -1.894E+01 | 0.999954 | 2.264E-01  | -1.097524 | 0.001771  | 2.841E+01  |
|      | A | H( $\gamma$ )*                               | 4.302E-01 | -0.005820 | 5.120E-03 | 4.724E+00  | -4.729E+00 | -4.724E+00 | -1.888E+01 | 0.999947 | 1.826E-01  | -1.096393 | 0.001999  | 2.859E+01  |
|      | A | H( $\gamma$ )*                               | 4.302E-01 | -0.005820 | 5.120E-03 | 4.724E+00  | -4.729E+00 | -4.724E+00 | -1.888E+01 | 0.999947 | 1.826E-01  | -1.096393 | 0.001999  | 2.859E+01  |
|      | A | H( $\beta$ )*                                | 4.311E-01 | 0.005533  | 4.768E-03 | 4.739E+00  | -4.744E+00 | -4.739E+00 | -1.894E+01 | 0.999954 | 2.264E-01  | -1.097524 | 0.001771  | 2.841E+01  |
|      | A | H( $\alpha$ )*                               | 4.283E-01 | -0.014952 | 5.500E-03 | 4.683E+00  | -4.689E+00 | -4.683E+00 | -1.871E+01 | 0.999939 | 3.674E-01  | -1.099945 | 0.002097  | 2.776E+01  |
|      | B | C(sp3)-C( $\alpha$ )                         | 2.643E-01 | -0.001504 | 5.626E-02 | 2.378E-01  | -2.941E-01 | -2.378E-01 | -7.263E-01 | 0.968747 | 4.164E-02  | 1.751492  | 0.033920  | 5.291E-01  |
|      | B | C( $\alpha$ )-C( $\beta$ )                   | 3.400E-01 | -0.000769 | 1.172E-01 | 3.811E-01  | -4.983E-01 | -3.811E-01 | -1.056E+00 | 0.942820 | 2.183E-02  | 3.143260  | 0.371302  | 8.110E-01  |
|      | B | C( $\beta$ )-C( $\gamma$ )                   | 2.903E-01 | 0.000410  | 7.093E-02 | 2.785E-01  | -3.494E-01 | -2.785E-01 | -8.303E-01 | 0.963888 | 1.217E-02  | 2.077554  | 0.162732  | 6.390E-01  |
|      | B | C( $\gamma$ )-C( $\gamma$ )                  | 3.412E-01 | -0.000333 | 1.106E-01 | 3.830E-01  | -4.936E-01 | -3.830E-01 | -1.090E+00 | 0.949468 | 1.423E-02  | 3.155981  | 0.312975  | 8.198E-01  |
|      | B | C( $\beta$ )-C( $\gamma$ )                   | 2.879E-01 | -0.001189 | 6.891E-02 | 2.743E-01  | -3.432E-01 | -2.743E-01 | -8.217E-01 | 0.964897 | 1.199E-02  | 2.051172  | 0.152130  | 6.328E-01  |
|      | B | C( $\alpha$ )-C( $\beta$ )                   | 3.380E-01 | 0.000529  | 1.137E-01 | 3.772E-01  | -4.909E-01 | -3.772E-01 | -1.054E+00 | 0.945079 | 2.222E-02  | 3.095427  | 0.343752  | 8.029E-01  |
|      | B | C(sp3)-C( $\alpha$ )                         | 2.654E-01 | 0.004416  | 5.700E-02 | 2.383E-01  | -2.953E-01 | -2.383E-01 | -7.253E-01 | 0.968251 | 4.329E-02  | 1.752576  | 0.045224  | 5.235E-01  |
|      | B | C( $\alpha$ )-H( $\alpha$ )                  | 2.798E-01 | -0.000692 | 3.367E-02 | 2.854E-01  | -3.191E-01 | -2.854E-01 | -1.007E+00 | 0.990547 | 2.238E-02  | 1.573940  | 0.151007  | 6.941E-01  |
|      | B | C( $\beta$ )-H( $\beta$ )                    | 2.733E-01 | 0.000109  | 3.860E-02 | 2.740E-01  | -3.126E-01 | -2.740E-01 | -9.415E-01 | 0.986578 | 1.240E-02  | 1.559052  | 0.038392  | 7.070E-01  |
|      | B | C( $\gamma$ )-H( $\gamma$ )                  | 2.745E-01 | -0.000251 | 3.777E-02 | 2.759E-01  | -3.137E-01 | -2.759E-01 | -9.526E-01 | 0.987365 | 1.009E-02  | 1.560101  | 0.031635  | 7.214E-01  |
|      | B | C( $\gamma$ )-H( $\gamma$ )                  | 2.742E-01 | 0.000199  | 3.822E-02 | 2.755E-01  | -3.138E-01 | -2.755E-01 | -9.493E-01 | 0.987015 | 1.008E-02  | 1.563257  | 0.035180  | 7.202E-01  |
|      | B | C( $\beta$ )-H( $\beta$ )                    | 2.736E-01 | -0.000158 | 3.827E-02 | 2.743E-01  | -3.125E-01 | -2.743E-01 | -9.440E-01 | 0.986858 | 1.255E-02  | 1.555103  | 0.034738  | 7.059E-01  |
|      | B | C( $\alpha$ )-H( $\alpha$ )                  | 2.793E-01 | 0.000816  | 3.474E-02 | 2.845E-01  | -3.193E-01 | -2.845E-01 | -9.992E-01 | 0.989862 | 2.273E-02  | 1.578771  | 0.023715  | 6.878E-01  |
|      | B | C(sp3)-C( $\alpha$ )*                        | 2.628E-01 | -0.001472 | 5.673E-02 | 2.319E-01  | -2.886E-01 | -2.319E-01 | -7.007E-01 | 0.967580 | 3.865E-02  | 1.725264  | 0.062358  | 4.945E-01  |
|      | B | C( $\alpha$ )-C( $\beta$ )*                  | 3.301E-01 | -0.000479 | 1.107E-01 | 3.605E-01  | -4.711E-01 | -3.605E-01 | -9.992E-01 | 0.943661 | 2.083E-02  | 2.955233  | 0.380984  | 7.369E-01  |
|      | B | C( $\beta$ )-C( $\gamma$ )*                  | 2.940E-01 | -0.000878 | 7.991E-02 | 2.866E-01  | -3.665E-01 | -2.866E-01 | -8.269E-01 | 0.956170 | 1.202E-02  | 2.180548  | 0.241908  | 5.971E-01  |
|      | B | C( $\gamma$ )-C( $\gamma$ )*                 | 3.278E-01 | -0.000115 | 1.034E-01 | 3.545E-01  | -4.579E-01 | -3.545E-01 | -1.005E+00 | 0.949317 | 1.313E-02  | 2.873276  | 0.332837  | 7.048E-01  |
|      | B | C( $\beta$ )-C( $\gamma$ )*                  | 2.940E-01 | -0.000878 | 7.991E-02 | 2.866E-01  | -3.665E-01 | -2.866E-01 | -8.269E-01 | 0.956170 | 1.202E-02  | 2.180548  | 0.241908  | 5.971E-01  |
|      | B | C( $\alpha$ )-C( $\beta$ )*                  | 3.301E-01 | -0.000479 | 1.107E-01 | 3.605E-01  | -4.711E-01 | -3.605E-01 | -9.992E-01 | 0.943661 | 2.083E-02  | 2.955233  | 0.380984  | 7.369E-01  |
|      | B | C(sp3)-C( $\alpha$ )*                        | 2.628E-01 | -0.001472 | 5.673E-02 | 2.319E-01  | -2.886E-01 | -2.319E-01 | -7.007E-01 | 0.967580 | 3.865E-02  | 1.725265  | 0.062358  | 4.945E-01  |
|      | B | C( $\alpha$ )-H( $\alpha$ )*                 | 2.731E-01 | -0.000020 | 4.283E-02 | 2.749E-01  | -3.177E-01 | -2.749E-01 | -9.282E-01 | 0.983505 | 2.098E-02  | 1.581381  | 0.058500  | 6.668E-01  |
|      | B | C( $\beta$ )-H( $\beta$ )*                   | 2.717E-01 | -0.000141 | 3.938E-02 | 2.719E-01  | -3.112E-01 | -2.719E-01 | -9.300E-01 | 0.985723 | 1.232E-02  | 1.552327  | 0.029910  | 6.661E-01  |
|      | B | C( $\gamma$ )-H( $\gamma$ )*                 | 2.699E-01 | 0.000097  | 4.250E-02 | 2.698E-01  | -3.123E-01 | -2.698E-01 | -9.094E-01 | 0.983047 | 9.670E-03  | 1.571434  | 0.053870  | 6.601E-01  |
|      | B | C( $\gamma$ )-H( $\gamma$ )*                 | 2.699E-01 | 0.000097  | 4.250E-02 | 2.698E-01  | -3.123E-01 | -2.698E-01 | -9.094E-01 | 0.983047 | 9.670E-03  | 1.571435  | 0.053870  | 6.601E-01  |
|      | B | C( $\beta$ )-H( $\beta$ )*                   | 2.717E-01 | -0.000141 | 3.938E-02 | 2.719E-01  | -3.112E-01 | -2.719E-01 | -9.300E-01 | 0.985723 | 1.232E-02  | 1.552327  | 0.029910  | 6.661E-01  |
|      | B | C( $\alpha$ )-H( $\alpha$ )*                 | 2.731E-01 | -0.000020 | 4.283E-02 | 2.749E-01  | -3.177E-01 | -2.749E-01 | -9.282E-01 | 0.983505 | 2.098E-02  | 1.581381  | 0.058500  | 6.668E-01  |
|      | R | O                                            | 8.216E-03 | -0.000010 | 1.018E-02 | -3.091E-03 | -7.086E-03 | 3.091E-03  | 5.307E-02  | 0.008812 | -1.276E-03 | 0.126818  | -1.147377 | -6.803E-02 |

**Table S3 (continued)**

|      |   |                              |           |           |           |            |            |            |            |           |            |           |           |            |
|------|---|------------------------------|-----------|-----------|-----------|------------|------------|------------|------------|-----------|------------|-----------|-----------|------------|
|      | R | O*                           | 7.991E-03 | -0.000016 | 9.952E-03 | -3.059E-03 | -6.894E-03 | 3.059E-03  | 5.204E-02  | 0.008404  | -1.258E-03 | 0.115806  | -1.138723 | -1.195E-01 |
| 5    | A | C(sp3)                       | 1.179E+02 | 0.000000  | 4.847E+00 | 1.089E+05  | -1.090E+05 | -1.089E+05 | -4.358E+05 | 1.000000  | 2.130E+04  | -1.000007 | 0.000006  | 1.221E+06  |
|      | A | C( $\alpha$ )                | 1.181E+02 | 0.000000  | 4.841E+00 | 1.091E+05  | -1.091E+05 | -1.091E+05 | -4.365E+05 | 1.000000  | 2.240E+04  | -1.000011 | 0.000004  | 2.385E+06  |
|      | A | C( $\alpha$ )                | 1.181E+02 | 0.000000  | 4.841E+00 | 1.091E+05  | -1.091E+05 | -1.091E+05 | -4.365E+05 | 1.000000  | 2.240E+04  | -1.000011 | 0.000004  | 2.385E+06  |
|      | A | H( $\alpha$ )                | 4.098E-01 | 0.000000  | 4.255E-03 | 4.466E+00  | -4.470E+00 | -4.466E+00 | -1.785E+01 | 0.999957  | 4.005E-01  | -1.117409 | 0.000479  | 2.479E+01  |
|      | A | H( $\alpha$ )                | 4.098E-01 | 0.000000  | 4.255E-03 | 4.466E+00  | -4.470E+00 | -4.466E+00 | -1.785E+01 | 0.999957  | 4.005E-01  | -1.117409 | 0.000479  | 2.479E+01  |
|      | A | H(sp3)                       | 4.298E-01 | 0.000000  | 4.784E-03 | 4.721E+00  | -4.726E+00 | -4.721E+00 | -1.886E+01 | 0.999953  | 4.652E-01  | -1.102546 | 0.001316  | 2.752E+01  |
|      | A | H(sp3)                       | 4.298E-01 | 0.000000  | 4.784E-03 | 4.721E+00  | -4.726E+00 | -4.721E+00 | -1.886E+01 | 0.999953  | 4.652E-01  | -1.102546 | 0.001316  | 2.752E+01  |
|      | B | C(sp3)-C( $\alpha$ )         | 2.373E-01 | 0.000000  | 9.605E-02 | 1.998E-01  | -2.959E-01 | -1.998E-01 | -4.151E-01 | 0.880865  | 3.977E-02  | 1.490746  | 0.533267  | 7.269E-01  |
|      | B | C( $\alpha$ )-C( $\alpha'$ ) | 3.526E-01 | 0.000000  | 1.815E-01 | 4.279E-01  | -6.094E-01 | -4.279E-01 | -9.855E-01 | 0.885718  | 7.140E-02  | 3.552362  | 0.301626  | 1.079E+00  |
|      | B | C(sp3)-C( $\alpha$ )         | 2.373E-01 | 0.000000  | 9.605E-02 | 1.998E-01  | -2.959E-01 | -1.998E-01 | -4.151E-01 | 0.880865  | 3.977E-02  | 1.490746  | 0.533267  | 7.269E-01  |
|      | B | C( $\alpha$ )-H( $\alpha$ )  | 2.794E-01 | 0.000000  | 2.704E-02 | 2.937E-01  | -3.207E-01 | -2.937E-01 | -1.066E+00 | 0.993819  | 2.953E-02  | 1.656399  | 0.001303  | 9.005E-01  |
|      | B | C( $\alpha$ )-H( $\alpha$ )  | 2.794E-01 | 0.000000  | 2.704E-02 | 2.937E-01  | -3.207E-01 | -2.937E-01 | -1.066E+00 | 0.993819  | 2.953E-02  | 1.656399  | 0.001303  | 9.005E-01  |
|      | B | C(sp3)-H(sp3)                | 2.772E-01 | 0.000000  | 3.530E-02 | 2.792E-01  | -3.145E-01 | -2.792E-01 | -9.754E-01 | 0.989220  | 3.004E-02  | 1.555031  | 0.036340  | 8.169E-01  |
|      | B | C(sp3)-H(sp3)                | 2.772E-01 | 0.000000  | 3.530E-02 | 2.792E-01  | -3.145E-01 | -2.792E-01 | -9.754E-01 | 0.989220  | 3.004E-02  | 1.555031  | 0.036340  | 8.169E-01  |
|      | R | O                            | 2.120E-01 | 0.000000  | 1.838E-01 | 1.448E-01  | -3.286E-01 | -1.448E-01 | 1.560E-01  | 0.880890  | -7.814E-02 | 1.145341  | -2.618769 | 7.233E-01  |
| 5(-) | A | C(sp3)                       | 1.179E+02 | -0.020350 | 4.822E+00 | 1.089E+05  | -1.089E+05 | -1.089E+05 | -4.357E+05 | 1.000000  | 2.224E+04  | -1.000012 | 0.000001  | 1.042E+07  |
|      | A | C( $\alpha$ )                | 1.182E+02 | 0.165576  | 4.605E+00 | 1.092E+05  | -1.092E+05 | -1.092E+05 | -4.367E+05 | 1.000000  | 2.092E+04  | -1.000011 | 0.000006  | 7.507E+05  |
|      | A | C( $\alpha$ )                | 1.182E+02 | 0.165576  | 4.605E+00 | 1.092E+05  | -1.092E+05 | -1.092E+05 | -4.367E+05 | 1.000000  | 2.092E+04  | -1.000011 | 0.000006  | 7.507E+05  |
|      | A | H(sp3)                       | 4.299E-01 | -0.003599 | 5.417E-03 | 4.761E+00  | -4.767E+00 | -4.761E+00 | -1.902E+01 | 0.999941  | 4.697E-01  | -1.087220 | 0.001442  | 3.128E+01  |
|      | A | H(sp3)                       | 4.299E-01 | -0.003599 | 5.417E-03 | 4.761E+00  | -4.767E+00 | -4.761E+00 | -1.902E+01 | 0.999941  | 4.697E-01  | -1.087220 | 0.001442  | 3.128E+01  |
|      | A | H( $\alpha$ )                | 4.187E-01 | 0.017222  | 6.094E-03 | 4.631E+00  | -4.637E+00 | -4.631E+00 | -1.850E+01 | 0.999920  | 4.341E-01  | -1.087765 | 0.000868  | 3.085E+01  |
|      | A | H( $\alpha$ )                | 4.187E-01 | 0.017222  | 6.094E-03 | 4.631E+00  | -4.637E+00 | -4.631E+00 | -1.850E+01 | 0.999920  | 4.341E-01  | -1.087765 | 0.000868  | 3.085E+01  |
|      | B | C(sp3)-C( $\alpha$ )         | 2.331E-01 | 0.000294  | 9.298E-02 | 1.968E-01  | -2.898E-01 | -1.968E-01 | -4.154E-01 | 0.881523  | 3.927E-02  | 1.542674  | 0.506354  | 4.477E-01  |
|      | B | C( $\alpha$ )-C( $\alpha'$ ) | 2.726E-01 | 0.009099  | 1.153E-01 | 2.649E-01  | -3.802E-01 | -2.649E-01 | -5.985E-01 | 0.890928  | 4.310E-02  | 1.698900  | 0.079878  | 5.486E-01  |
|      | B | C(sp3)-C( $\alpha$ )         | 2.331E-01 | 0.000294  | 9.298E-02 | 1.968E-01  | -2.898E-01 | -1.968E-01 | -4.154E-01 | 0.881524  | 3.927E-02  | 1.542676  | 0.506351  | 4.477E-01  |
|      | B | C( $\alpha$ )-H( $\alpha$ )  | 2.544E-01 | 0.002213  | 4.651E-02 | 2.450E-01  | -2.916E-01 | -2.450E-01 | -7.942E-01 | 0.975680  | 2.354E-02  | 1.467786  | 0.048943  | 5.813E-01  |
|      | B | C( $\alpha$ )-H( $\alpha$ )  | 2.544E-01 | 0.002213  | 4.651E-02 | 2.450E-01  | -2.916E-01 | -2.450E-01 | -7.942E-01 | 0.975680  | 2.354E-02  | 1.467792  | 0.048943  | 5.813E-01  |
|      | B | C(sp3)-H(sp3)                | 2.591E-01 | 0.000864  | 4.407E-02 | 2.499E-01  | -2.940E-01 | -2.499E-01 | -8.232E-01 | 0.979183  | 2.599E-02  | 1.485811  | 0.062197  | 5.807E-01  |
|      | B | C(sp3)-H(sp3)                | 2.591E-01 | 0.000864  | 4.407E-02 | 2.499E-01  | -2.940E-01 | -2.499E-01 | -8.232E-01 | 0.979183  | 2.599E-02  | 1.485811  | 0.062197  | 5.807E-01  |
|      | R | O                            | 2.017E-01 | 0.004479  | 1.607E-01 | 1.306E-01  | -2.913E-01 | -1.306E-01 | 1.202E-01  | 0.606115  | -1.864E-01 | 1.237649  | -2.762696 | 3.759E-01  |
| 4    | A | C(sp3)                       | 1.180E+02 | 0.000000  | 4.949E+00 | 1.090E+05  | -1.091E+05 | -1.090E+05 | -4.362E+05 | 1.000000  | 1.503E+04  | -1.000003 | 0.000002  | 4.158E+07  |
|      | A | C( $\alpha$ )                | 1.182E+02 | 0.000000  | 4.796E+00 | 1.092E+05  | -1.092E+05 | -1.092E+05 | -4.367E+05 | 1.000000  | 1.516E+04  | -1.000009 | 0.000007  | 3.520E+06  |
|      | A | C( $\beta$ )                 | 1.182E+02 | 0.000000  | 4.803E+00 | 1.092E+05  | -1.092E+05 | -1.092E+05 | -4.367E+05 | 1.000000  | 1.486E+04  | -1.000010 | 0.000007  | 3.279E+06  |
|      | A | C( $\beta$ )                 | 1.182E+02 | 0.000000  | 4.803E+00 | 1.092E+05  | -1.092E+05 | -1.092E+05 | -4.367E+05 | 1.000000  | 1.486E+04  | -1.000010 | 0.000007  | 3.279E+06  |
|      | A | C( $\alpha$ )                | 1.182E+02 | 0.000000  | 4.796E+00 | 1.092E+05  | -1.092E+05 | -1.092E+05 | -4.367E+05 | 1.000000  | 1.516E+04  | -1.000009 | 0.000007  | 3.520E+06  |
|      | A | H( $\alpha$ )                | 4.204E-01 | 0.000000  | 4.397E-03 | 4.582E+00  | -4.587E+00 | -4.582E+00 | -1.831E+01 | 0.999958  | 3.384E-01  | -1.109618 | 0.001115  | 2.589E+01  |
|      | A | H( $\beta$ )                 | 4.216E-01 | 0.000000  | 4.200E-03 | 4.600E+00  | -4.604E+00 | -4.600E+00 | -1.838E+01 | 0.999962  | 3.359E-01  | -1.109316 | 0.001038  | 2.596E+01  |
|      | A | H( $\beta$ )                 | 4.216E-01 | 0.000000  | 4.200E-03 | 4.600E+00  | -4.604E+00 | -4.600E+00 | -1.838E+01 | 0.999962  | 3.359E-01  | -1.109316 | 0.001038  | 2.596E+01  |
|      | A | H( $\alpha$ )                | 4.204E-01 | 0.000000  | 4.397E-03 | 4.582E+00  | -4.587E+00 | -4.582E+00 | -1.831E+01 | 0.999958  | 3.384E-01  | -1.109618 | 0.001115  | 2.589E+01  |
|      | A | H(sp3)                       | 4.148E-01 | 0.000000  | 4.750E-03 | 4.542E+00  | -4.547E+00 | -4.542E+00 | -1.815E+01 | 0.999948  | 3.709E-01  | -1.100720 | 0.000289  | 2.756E+01  |
|      | A | H(sp3)                       | 4.148E-01 | 0.000000  | 4.750E-03 | 4.542E+00  | -4.547E+00 | -4.542E+00 | -1.815E+01 | 0.999948  | 3.709E-01  | -1.100720 | 0.000289  | 2.756E+01  |
|      | B | C(sp3)-C( $\alpha$ )         | 2.645E-01 | 0.000000  | 5.614E-02 | 2.342E-01  | -2.903E-01 | -2.342E-01 | -7.122E-01 | 0.968826  | 3.092E-02  | 1.718934  | 0.049663  | 6.613E-01  |
|      | B | C( $\alpha$ )-C( $\beta$ )   | 3.452E-01 | 0.000000  | 1.275E-01 | 3.921E-01  | -5.196E-01 | -3.921E-01 | -1.059E+00 | 0.936077  | 4.298E-02  | 3.249776  | 0.428544  | 9.453E-01  |
|      | B | C( $\beta$ )-C( $\beta'$ )   | 2.789E-01 | 0.000000  | 6.354E-02 | 2.585E-01  | -3.220E-01 | -2.585E-01 | -7.797E-01 | 0.966583  | 3.230E-02  | 1.886245  | 0.106966  | 7.153E-01  |
|      | B | C( $\alpha$ )-C( $\beta$ )   | 3.452E-01 | 0.000000  | 1.275E-01 | 3.921E-01  | -5.196E-01 | -3.921E-01 | -1.059E+00 | 0.936077  | 4.298E-02  | 3.249776  | 0.428544  | 9.453E-01  |
|      | B | C(sp3)-C( $\alpha$ )         | 2.645E-01 | 0.000000  | 5.614E-02 | 2.342E-01  | -2.903E-01 | -2.342E-01 | -7.122E-01 | 0.968826  | 3.092E-02  | 1.718934  | 0.049663  | 6.613E-01  |
|      | B | C( $\alpha$ )-H( $\alpha$ )  | 2.790E-01 | 0.000000  | 3.165E-02 | 2.857E-01  | -3.174E-01 | -2.857E-01 | -1.016E+00 | 0.991502  | 2.245E-02  | 1.605352  | 0.018477  | 8.559E-01  |
|      | B | C( $\beta$ )-H( $\beta$ )    | 2.794E-01 | 0.000000  | 3.065E-02 | 2.860E-01  | -3.166E-01 | -2.860E-01 | -1.021E+00 | 0.992068  | 2.227E-02  | 1.601809  | 0.014334  | 8.551E-01  |
|      | B | C( $\beta$ )-H( $\beta$ )    | 2.794E-01 | 0.000000  | 3.065E-02 | 2.860E-01  | -3.166E-01 | -2.860E-01 | -1.021E+00 | 0.992068  | 2.227E-02  | 1.601809  | 0.014334  | 8.551E-01  |
|      | B | C( $\alpha$ )-H( $\alpha$ )  | 2.790E-01 | 0.000000  | 3.165E-02 | 2.857E-01  | -3.174E-01 | -2.857E-01 | -1.016E+00 | 0.991502  | 2.245E-02  | 1.605352  | 0.018477  | 8.559E-01  |
|      | B | C(sp3)-H(sp3)                | 2.671E-01 | 0.000000  | 3.642E-02 | 2.632E-01  | -2.996E-01 | -2.632E-01 | -9.072E-01 | 0.987047  | 2.206E-02  | 1.483723  | 0.013232  | 8.290E-01  |
|      | B | C(sp3)-H(sp3)                | 2.671E-01 | 0.000000  | 3.642E-02 | 2.632E-01  | -2.996E-01 | -2.632E-01 | -9.072E-01 | 0.987047  | 2.206E-02  | 1.483723  | 0.013232  | 8.290E-01  |
|      | R | O                            | 4.322E-02 | 0.000000  | 7.226E-02 | -8.770E-03 | -6.349E-02 | 8.770E-03  | 3.241E-01  | 0.0442821 | -5.547E-01 | 0.221374  | -1.228421 | 2.286E-01  |
| 4(+) | A | C(sp3)                       | 1.180E+02 | -0.040121 | 5.045E+00 | 1.091E+05  | -1.091E+05 | -1.091E+05 | -4.362E+05 | 1.000000  | 1.479E+04  | -1.000006 | 0.000005  | 2.363E+06  |
|      | A | C( $\alpha$ )                | 1.183E+02 | 0.110846  | 4.767E+00 | 1.093E+05  | -1.093E+05 | -1.093E+05 | -4.370E+05 | 1.000000  | 1.533E+04  | -1.000021 | 0.000019  | 7.447E+06  |

Table S3 (continued)

|      |                             |           |           |           |            |            |            |            |          |            |           |           |            |
|------|-----------------------------|-----------|-----------|-----------|------------|------------|------------|------------|----------|------------|-----------|-----------|------------|
| A    | C( $\beta$ )                | 1.182E+02 | -0.023342 | 4.797E+00 | 1.092E+05  | -1.092E+05 | -1.092E+05 | -4.369E+05 | 1.000000 | 1.481E+04  | -1.000019 | 0.000017  | 5.849E+06  |
| A    | C( $\beta$ )                | 1.182E+02 | -0.023342 | 4.797E+00 | 1.092E+05  | -1.092E+05 | -1.092E+05 | -4.369E+05 | 1.000000 | 1.481E+04  | -1.000019 | 0.000017  | 5.849E+06  |
| A    | C( $\alpha$ )               | 1.183E+02 | 0.110846  | 4.767E+00 | 1.093E+05  | -1.093E+05 | -1.093E+05 | -4.370E+05 | 1.000000 | 1.533E+04  | -1.000021 | 0.000019  | 7.447E+06  |
| A    | H( $\alpha$ )               | 4.079E-01 | -0.016975 | 3.594E-03 | 4.408E+00  | -4.411E+00 | -4.408E+00 | -1.762E+01 | 0.999969 | 3.274E-01  | -1.126506 | 0.000687  | 2.360E+01  |
| A    | H( $\beta$ )                | 4.081E-01 | 0.000890  | 3.420E-03 | 4.406E+00  | -4.409E+00 | -4.406E+00 | -1.761E+01 | 0.999972 | 3.214E-01  | -1.126607 | 0.000770  | 2.355E+01  |
| A    | H( $\beta$ )                | 4.081E-01 | 0.000890  | 3.420E-03 | 4.406E+00  | -4.409E+00 | -4.406E+00 | -1.761E+01 | 0.999972 | 3.214E-01  | -1.126607 | 0.000770  | 2.355E+01  |
| A    | H( $\alpha$ )               | 4.079E-01 | -0.016975 | 3.594E-03 | 4.408E+00  | -4.411E+00 | -4.408E+00 | -1.762E+01 | 0.999969 | 3.274E-01  | -1.126506 | 0.000687  | 2.360E+01  |
| A    | H(sp3)                      | 3.996E-01 | 0.007167  | 4.352E-03 | 4.345E+00  | -4.349E+00 | -4.345E+00 | -1.736E+01 | 0.999951 | 3.512E-01  | -1.111193 | 0.000565  | 2.569E+01  |
| A    | H(sp3)                      | 3.996E-01 | 0.007167  | 4.352E-03 | 4.345E+00  | -4.349E+00 | -4.345E+00 | -1.736E+01 | 0.999951 | 3.512E-01  | -1.111193 | 0.000565  | 2.569E+01  |
| B    | C(sp3)-C( $\alpha$ )        | 2.734E-01 | -0.003110 | 6.047E-02 | 2.533E-01  | -3.137E-01 | -2.533E-01 | -7.712E-01 | 0.967719 | 3.329E-02  | 1.824568  | 0.037917  | 9.492E-01  |
| B    | C( $\alpha$ )-C( $\beta$ )  | 3.242E-01 | -0.003840 | 9.157E-02 | 3.416E-01  | -4.332E-01 | -3.416E-01 | -1.000E+00 | 0.958397 | 4.158E-02  | 2.416810  | 0.168180  | 1.110E+00  |
| B    | C( $\beta$ )-C( $\beta'$ )  | 3.194E-01 | 0.001807  | 8.715E-02 | 3.318E-01  | -4.190E-01 | -3.318E-01 | -9.787E-01 | 0.960267 | 3.974E-02  | 2.338751  | 0.162384  | 1.092E+00  |
| B    | C( $\alpha$ )-C( $\beta$ )  | 3.242E-01 | -0.003840 | 9.157E-02 | 3.416E-01  | -4.332E-01 | -3.416E-01 | -1.000E+00 | 0.958397 | 4.158E-02  | 2.416810  | 0.168180  | 1.110E+00  |
| B    | C(sp3)-C( $\alpha$ )        | 2.734E-01 | -0.003110 | 6.047E-02 | 2.533E-01  | -3.137E-01 | -2.533E-01 | -7.712E-01 | 0.967719 | 3.329E-02  | 1.824568  | 0.037917  | 9.492E-01  |
| B    | C( $\alpha$ )-H( $\alpha$ ) | 2.864E-01 | -0.003062 | 2.229E-02 | 3.075E-01  | -3.297E-01 | -3.075E-01 | -1.141E+00 | 0.996154 | 2.491E-02  | 1.678456  | 0.001235  | 1.106E+00  |
| B    | C( $\beta$ )-H( $\beta$ )   | 2.865E-01 | 0.000147  | 2.146E-02 | 3.073E-01  | -3.287E-01 | -3.073E-01 | -1.143E+00 | 0.996408 | 2.446E-02  | 1.682117  | 0.000476  | 1.105E+00  |
| B    | C( $\beta$ )-H( $\beta$ )   | 2.865E-01 | 0.000147  | 2.146E-02 | 3.073E-01  | -3.287E-01 | -3.073E-01 | -1.143E+00 | 0.996408 | 2.446E-02  | 1.682117  | 0.000476  | 1.105E+00  |
| B    | C( $\alpha$ )-H( $\alpha$ ) | 2.864E-01 | -0.003062 | 2.229E-02 | 3.075E-01  | -3.297E-01 | -3.075E-01 | -1.141E+00 | 0.996154 | 2.491E-02  | 1.678456  | 0.001235  | 1.106E+00  |
| B    | C(sp3)-H(sp3)               | 2.682E-01 | 0.001307  | 3.057E-02 | 2.681E-01  | -2.987E-01 | -2.681E-01 | -9.503E-01 | 0.990971 | 2.262E-02  | 1.517473  | 0.022260  | 1.049E+00  |
| B    | C(sp3)-H(sp3)               | 2.682E-01 | 0.001307  | 3.057E-02 | 2.681E-01  | -2.987E-01 | -2.681E-01 | -9.503E-01 | 0.990971 | 2.262E-02  | 1.517473  | 0.022260  | 1.049E+00  |
| R    | O                           | 4.412E-02 | 0.000035  | 7.474E-02 | -8.866E-03 | -6.588E-02 | 8.866E-03  | 3.344E-01  | 0.042860 | -6.629E-01 | 0.218227  | -1.245753 | 4.925E-01  |
| 4(-) | A                           | C(sp3)    | 1.180E+02 | -0.072742 | 4.772E+00  | 1.090E+05  | -1.090E+05 | -4.361E+05 | 1.000000 | 1.480E+04  | -1.000004 | 0.000003  | 3.048E+06  |
| A    | C( $\alpha$ )               | 1.180E+02 | 0.151224  | 4.847E+00 | 1.091E+05  | -1.091E+05 | -1.091E+05 | -4.362E+05 | 1.000000 | 1.500E+04  | -1.000010 | 0.000003  | 2.224E+06  |
| A    | C( $\beta$ )                | 1.181E+02 | -0.030409 | 4.773E+00 | 1.091E+05  | -1.091E+05 | -1.091E+05 | -4.364E+05 | 1.000000 | 1.479E+04  | -1.000004 | 0.000001  | 2.428E+06  |
| A    | C( $\beta$ )                | 1.181E+02 | -0.030409 | 4.773E+00 | 1.091E+05  | -1.091E+05 | -1.091E+05 | -4.364E+05 | 1.000000 | 1.479E+04  | -1.000004 | 0.000001  | 2.428E+06  |
| A    | C( $\alpha$ )               | 1.180E+02 | 0.151224  | 4.847E+00 | 1.091E+05  | -1.091E+05 | -1.091E+05 | -4.362E+05 | 1.000000 | 1.500E+04  | -1.000010 | 0.000003  | 2.224E+06  |
| A    | H( $\alpha$ )               | 4.241E-01 | -0.014010 | 5.832E-03 | 4.658E+00  | -4.664E+00 | -4.658E+00 | -1.861E+01 | 0.999929 | 3.433E-01  | -1.093409 | 0.001860  | 2.916E+01  |
| A    | H( $\beta$ )                | 4.269E-01 | 0.001007  | 5.014E-03 | 4.695E+00  | -4.700E+00 | -4.695E+00 | -1.876E+01 | 0.999948 | 3.408E-01  | -1.094828 | 0.001411  | 2.883E+01  |
| A    | H( $\beta$ )                | 4.269E-01 | 0.001007  | 5.014E-03 | 4.695E+00  | -4.700E+00 | -4.695E+00 | -1.876E+01 | 0.999948 | 3.408E-01  | -1.094828 | 0.001411  | 2.883E+01  |
| A    | H( $\alpha$ )               | 4.241E-01 | -0.014010 | 5.832E-03 | 4.658E+00  | -4.664E+00 | -4.658E+00 | -1.861E+01 | 0.999929 | 3.433E-01  | -1.093409 | 0.001860  | 2.916E+01  |
| A    | H(sp3)                      | 4.212E-01 | 0.039362  | 5.181E-03 | 4.686E+00  | -4.691E+00 | -4.686E+00 | -1.872E+01 | 0.999947 | 3.826E-01  | -1.081540 | 0.000118  | 3.307E+01  |
| A    | H(sp3)                      | 4.270E-01 | 0.029828  | 5.011E-03 | 4.735E+00  | -4.740E+00 | -4.735E+00 | -1.892E+01 | 0.999950 | 3.682E-01  | -1.085962 | 0.000180  | 3.152E+01  |
| B    | C(sp3)-C( $\alpha$ )        | 2.550E-01 | -0.000538 | 5.847E-02 | 2.211E-01  | -2.796E-01 | -2.211E-01 | -6.506E-01 | 0.962177 | 2.768E-02  | 1.700316  | 0.102214  | 4.120E-01  |
| B    | C( $\alpha$ )-C( $\beta$ )  | 3.070E-01 | -0.000109 | 9.750E-02 | 3.138E-01  | -4.113E-01 | -3.138E-01 | -8.651E-01 | 0.944283 | 3.528E-02  | 2.439856  | 0.347512  | 5.874E-01  |
| B    | C( $\beta$ )-C( $\beta'$ )  | 3.045E-01 | -0.001030 | 9.303E-02 | 3.074E-01  | -4.004E-01 | -3.074E-01 | -8.575E-01 | 0.947615 | 3.458E-02  | 2.326000  | 0.304758  | 5.765E-01  |
| B    | C( $\alpha$ )-C( $\beta$ )  | 3.070E-01 | -0.000109 | 9.750E-02 | 3.138E-01  | -4.113E-01 | -3.138E-01 | -8.651E-01 | 0.944283 | 3.528E-02  | 2.439855  | 0.347512  | 5.874E-01  |
| B    | C(sp3)-C( $\alpha$ )        | 2.550E-01 | -0.000538 | 5.847E-02 | 2.211E-01  | -2.796E-01 | -2.211E-01 | -6.506E-01 | 0.962177 | 2.768E-02  | 1.700316  | 0.102214  | 4.120E-01  |
| B    | C( $\alpha$ )-H( $\alpha$ ) | 2.635E-01 | 0.000684  | 4.682E-02 | 2.611E-01  | -3.079E-01 | -2.611E-01 | -8.570E-01 | 0.977918 | 1.919E-02  | 1.577469  | 0.089038  | 6.294E-01  |
| B    | C( $\beta$ )-H( $\beta$ )   | 2.666E-01 | -0.000033 | 4.080E-02 | 2.650E-01  | -3.058E-01 | -2.650E-01 | -8.966E-01 | 0.983702 | 1.972E-02  | 1.564704  | 0.041114  | 6.365E-01  |
| B    | C( $\beta$ )-H( $\beta$ )   | 2.666E-01 | -0.000033 | 4.080E-02 | 2.650E-01  | -3.058E-01 | -2.650E-01 | -8.966E-01 | 0.983702 | 1.972E-02  | 1.564704  | 0.041114  | 6.365E-01  |
| B    | C( $\alpha$ )-H( $\alpha$ ) | 2.635E-01 | 0.000684  | 4.682E-02 | 2.611E-01  | -3.079E-01 | -2.611E-01 | -8.570E-01 | 0.977918 | 1.919E-02  | 1.577469  | 0.089038  | 6.294E-01  |
| B    | C(sp3)-H(sp3)               | 2.482E-01 | 0.001191  | 4.128E-02 | 2.281E-01  | -2.694E-01 | -2.281E-01 | -7.473E-01 | 0.979329 | 1.836E-02  | 1.331832  | 0.001695  | 5.648E-01  |
| B    | C(sp3)-H(sp3)               | 2.565E-01 | 0.002971  | 4.107E-02 | 2.436E-01  | -2.847E-01 | -2.436E-01 | -8.102E-01 | 0.981448 | 1.902E-02  | 1.403386  | 0.000616  | 5.873E-01  |
| R    | O                           | 4.074E-02 | 0.000071  | 6.634E-02 | -8.867E-03 | -5.747E-02 | 8.867E-03  | 3.008E-01  | 0.041747 | -6.641E-01 | 0.222914  | -1.223164 | -2.002E-02 |
| 6    | A                           | C(sp3)    | 1.180E+02 | 0.000000  | 4.948E+00  | 1.090E+05  | -1.090E+05 | -4.361E+05 | 1.000000 | 1.192E+04  | -1.000003 | 0.000000  | 4.142E+06  |
| A    | C( $\alpha$ )               | 1.182E+02 | 0.000000  | 4.749E+00 | 1.092E+05  | -1.092E+05 | -1.092E+05 | -4.368E+05 | 1.000000 | 1.167E+04  | -1.000011 | 0.000009  | 3.553E+06  |
| A    | C( $\beta$ )                | 1.181E+02 | 0.000000  | 4.826E+00 | 1.091E+05  | -1.092E+05 | -1.091E+05 | -4.366E+05 | 1.000000 | 1.151E+04  | -1.000009 | 0.000006  | 3.421E+06  |
| A    | C( $\gamma$ )               | 1.181E+02 | 0.000000  | 4.792E+00 | 1.092E+05  | -1.092E+05 | -1.092E+05 | -4.366E+05 | 1.000000 | 1.154E+04  | -1.000010 | 0.000008  | 4.595E+06  |
| A    | C( $\gamma$ )               | 1.181E+02 | 0.000000  | 4.792E+00 | 1.092E+05  | -1.092E+05 | -1.092E+05 | -4.366E+05 | 1.000000 | 1.154E+04  | -1.000010 | 0.000008  | 4.595E+06  |
| A    | C( $\beta$ )                | 1.181E+02 | 0.000000  | 4.826E+00 | 1.091E+05  | -1.092E+05 | -1.091E+05 | -4.366E+05 | 1.000000 | 1.151E+04  | -1.000009 | 0.000006  | 3.421E+06  |
| A    | C( $\alpha$ )               | 1.182E+02 | 0.000000  | 4.749E+00 | 1.092E+05  | -1.092E+05 | -1.092E+05 | -4.368E+05 | 1.000000 | 1.167E+04  | -1.000011 | 0.000009  | 3.553E+06  |
| A    | H( $\alpha$ )               | 4.236E-01 | 0.000000  | 4.437E-03 | 4.625E+00  | -4.629E+00 | -4.625E+00 | -1.848E+01 | 0.999958 | 2.982E-01  | -1.108029 | 0.001456  | 2.629E+01  |
| A    | H( $\beta$ )                | 4.230E-01 | 0.000000  | 4.391E-03 | 4.622E+00  | -4.626E+00 | -4.622E+00 | -1.847E+01 | 0.999959 | 2.941E-01  | -1.106916 | 0.001483  | 2.648E+01  |
| A    | H( $\gamma$ )               | 4.247E-01 | 0.000000  | 4.397E-03 | 4.639E+00  | -4.644E+00 | -4.639E+00 | -1.854E+01 | 0.999959 | 2.938E-01  | -1.107342 | 0.001525  | 2.644E+01  |
| A    | H( $\gamma$ )               | 4.247E-01 | 0.000000  | 4.397E-03 | 4.639E+00  | -4.644E+00 | -4.639E+00 | -1.854E+01 | 0.999959 | 2.938E-01  | -1.107342 | 0.001525  | 2.644E+01  |
| A    | H( $\beta$ )                | 4.230E-01 | 0.000000  | 4.391E-03 | 4.622E+00  | -4.626E+00 | -4.622E+00 | -1.847E+01 | 0.999959 | 2.941E-01  | -1.106916 | 0.001483  | 2.648E+01  |





**Table S3 (continued)**

|   |                             |           |           |           |            |            |            |            |          |            |           |           |            |
|---|-----------------------------|-----------|-----------|-----------|------------|------------|------------|------------|----------|------------|-----------|-----------|------------|
| A | C( $\alpha$ )               | 1.181E+02 | 0.154248  | 4.864E+00 | 1.091E+05  | -1.091E+05 | -1.091E+05 | -4.363E+05 | 1.000000 | 1.133E+04  | -1.000006 | 0.000003  | 2.986E+06  |
| A | H( $\alpha$ )               | 4.289E-01 | -0.018010 | 5.474E-03 | 4.713E+00  | -4.718E+00 | -4.713E+00 | -1.883E+01 | 0.999940 | 2.939E-01  | -1.095128 | 0.002087  | 2.890E+01  |
| A | H( $\beta$ )                | 4.314E-01 | 0.008688  | 4.795E-03 | 4.753E+00  | -4.758E+00 | -4.753E+00 | -1.899E+01 | 0.999954 | 2.959E-01  | -1.094736 | 0.001765  | 2.909E+01  |
| A | H( $\gamma$ )               | 4.299E-01 | -0.006898 | 5.241E-03 | 4.725E+00  | -4.730E+00 | -4.725E+00 | -1.888E+01 | 0.999944 | 2.898E-01  | -1.094679 | 0.002050  | 2.899E+01  |
| A | H( $\gamma$ )               | 4.299E-01 | -0.006898 | 5.241E-03 | 4.725E+00  | -4.730E+00 | -4.725E+00 | -1.888E+01 | 0.999944 | 2.898E-01  | -1.094679 | 0.002050  | 2.899E+01  |
| A | H( $\beta$ )                | 4.314E-01 | 0.008688  | 4.795E-03 | 4.753E+00  | -4.758E+00 | -4.753E+00 | -1.899E+01 | 0.999954 | 2.959E-01  | -1.094736 | 0.001765  | 2.909E+01  |
| A | H( $\alpha$ )               | 4.292E-01 | -0.018008 | 5.497E-03 | 4.714E+00  | -4.720E+00 | -4.714E+00 | -1.883E+01 | 0.999939 | 2.940E-01  | -1.095318 | 0.002092  | 2.885E+01  |
| A | H(sp3;eq)                   | 4.317E-01 | 0.008040  | 4.910E-03 | 4.758E+00  | -4.763E+00 | -4.758E+00 | -1.901E+01 | 0.999952 | 3.042E-01  | -1.091365 | 0.000422  | 2.990E+01  |
| A | H(sp3;ax)                   | 4.260E-01 | 0.021688  | 5.142E-03 | 4.704E+00  | -4.709E+00 | -4.704E+00 | -1.880E+01 | 0.999946 | 3.446E-01  | -1.090163 | 0.000498  | 3.031E+01  |
| B | C(sp3)-C( $\alpha$ )        | 2.586E-01 | -0.001081 | 5.414E-02 | 2.247E-01  | -2.788E-01 | -2.247E-01 | -6.821E-01 | 0.968873 | 1.983E-02  | 1.721149  | 0.079909  | 4.592E-01  |
| B | C( $\alpha$ )-C( $\beta$ )  | 3.227E-01 | -0.000230 | 1.046E-01 | 3.444E-01  | -4.490E-01 | -3.444E-01 | -9.593E-01 | 0.945758 | 2.771E-02  | 2.762982  | 0.362757  | 6.823E-01  |
| B | C( $\beta$ )-C( $\gamma$ )  | 3.021E-01 | -0.000479 | 8.664E-02 | 3.031E-01  | -3.898E-01 | -3.031E-01 | -8.660E-01 | 0.953118 | 2.470E-02  | 2.340925  | 0.274821  | 6.049E-01  |
| B | C( $\gamma$ )-C( $\gamma$ ) | 3.078E-01 | -0.000284 | 9.114E-02 | 3.132E-01  | -4.044E-01 | -3.132E-01 | -8.884E-01 | 0.951323 | 2.488E-02  | 2.441689  | 0.313101  | 6.127E-01  |
| B | C( $\beta$ )-C( $\gamma$ )  | 3.021E-01 | -0.000479 | 8.664E-02 | 3.031E-01  | -3.898E-01 | -3.031E-01 | -8.660E-01 | 0.953118 | 2.470E-02  | 2.340926  | 0.274821  | 6.049E-01  |
| B | C( $\alpha$ )-C( $\beta$ )  | 3.227E-01 | -0.000229 | 1.046E-01 | 3.444E-01  | -4.490E-01 | -3.444E-01 | -9.593E-01 | 0.945753 | 2.771E-02  | 2.763016  | 0.362758  | 6.822E-01  |
| B | C(sp3)-C( $\alpha$ )        | 2.586E-01 | -0.001081 | 5.414E-02 | 2.247E-01  | -2.788E-01 | -2.247E-01 | -6.822E-01 | 0.968881 | 1.983E-02  | 1.721210  | 0.079924  | 4.592E-01  |
| B | C( $\alpha$ )-H( $\alpha$ ) | 2.678E-01 | 0.000512  | 4.511E-02 | 2.666E-01  | -3.117E-01 | -2.666E-01 | -8.859E-01 | 0.980549 | 1.626E-02  | 1.567113  | 0.070171  | 6.516E-01  |
| B | C( $\beta$ )-H( $\beta$ )   | 2.685E-01 | -0.000256 | 4.054E-02 | 2.666E-01  | -3.071E-01 | -2.666E-01 | -9.040E-01 | 0.984310 | 1.655E-02  | 1.535362  | 0.031404  | 6.424E-01  |
| B | C( $\gamma$ )-H( $\gamma$ ) | 2.677E-01 | 0.000257  | 4.388E-02 | 2.666E-01  | -3.105E-01 | -2.666E-01 | -8.907E-01 | 0.981457 | 1.604E-02  | 1.569098  | 0.061823  | 6.373E-01  |
| B | C( $\gamma$ )-H( $\gamma$ ) | 2.677E-01 | 0.000257  | 4.388E-02 | 2.666E-01  | -3.105E-01 | -2.666E-01 | -8.907E-01 | 0.981457 | 1.604E-02  | 1.569098  | 0.061823  | 6.372E-01  |
| B | C( $\beta$ )-H( $\beta$ )   | 2.685E-01 | -0.000256 | 4.054E-02 | 2.666E-01  | -3.071E-01 | -2.666E-01 | -9.040E-01 | 0.984310 | 1.655E-02  | 1.535362  | 0.031403  | 6.424E-01  |
| B | C( $\alpha$ )-H( $\alpha$ ) | 2.682E-01 | 0.000519  | 4.529E-02 | 2.675E-01  | -3.128E-01 | -2.675E-01 | -8.889E-01 | 0.980495 | 1.632E-02  | 1.571965  | 0.070208  | 6.533E-01  |
| B | C(sp3)-H(sp3;eq)            | 2.656E-01 | 0.000872  | 4.153E-02 | 2.597E-01  | -3.013E-01 | -2.597E-01 | -8.728E-01 | 0.982924 | 1.628E-02  | 1.468231  | 0.008250  | 6.371E-01  |
| B | C(sp3)-H(sp3;ax)            | 2.611E-01 | 0.001875  | 4.120E-02 | 2.511E-01  | -2.923E-01 | -2.511E-01 | -8.395E-01 | 0.982312 | 1.754E-02  | 1.420747  | 0.005886  | 6.188E-01  |
| R | O                           | 7.944E-03 | -0.000050 | 9.852E-03 | -3.053E-03 | -6.799E-03 | 3.053E-03  | 5.162E-02  | 0.008407 | -2.763E-02 | 0.105194  | -1.122383 | -1.436E-01 |

**Cartesian coordinates** of optimised geometry of molecule **1** and its SCF electronic energy in different spin states employing different levels of theory.

***B3LYP, closed-shell singlet***

|                                 |          |          |           |                                        |          |          |           |
|---------------------------------|----------|----------|-----------|----------------------------------------|----------|----------|-----------|
| 6-31+G(d,p)                     |          |          |           | Aug-cc-pVTZ                            |          |          |           |
| Electronic energy: -347.7130495 |          |          |           | Electronic energy: -347.809437 Hartree |          |          |           |
| Hartree                         |          |          |           |                                        |          |          |           |
| C                               | -1.22639 | -0.65433 | -7.08778  | C                                      | -1.22441 | -0.65014 | -7.08944  |
| C                               | -0.76333 | 0.43068  | -8.05125  | C                                      | -0.76333 | 0.43068  | -8.05125  |
| C                               | -0.15472 | 1.45318  | -7.10044  | C                                      | -0.15695 | 1.44909  | -7.10205  |
| C                               | -0.26021 | 1.01466  | -5.82969  | C                                      | -0.26190 | 1.01310  | -5.83943  |
| C                               | -0.92802 | -0.29866 | -5.82181  | C                                      | -0.92781 | -0.29646 | -5.83157  |
| C                               | -1.88607 | 0.99641  | -8.91111  | C                                      | -1.88182 | 0.99426  | -8.90985  |
| C                               | -1.58686 | 0.83640  | -10.21613 | C                                      | -1.58425 | 0.83513  | -10.20655 |
| C                               | -0.27827 | 0.17026  | -10.33738 | C                                      | -0.27939 | 0.17090  | -10.32746 |
| C                               | 0.21385  | -0.07256 | -9.10568  | C                                      | 0.20985  | -0.07051 | -9.10367  |
| H                               | 0.20212  | -0.07967 | -11.27712 | H                                      | 0.19954  | -0.07827 | -11.26303 |
| H                               | -2.20244 | 1.14437  | -11.05432 | H                                      | -2.19777 | 1.14207  | -11.04089 |
| H                               | 0.08704  | 1.53560  | -4.94403  | H                                      | 0.08414  | 1.53240  | -4.95777  |
| H                               | -1.14009 | -0.87766 | -4.92954  | H                                      | -1.13929 | -0.87357 | -4.94332  |
| H                               | -1.71818 | -1.55958 | -7.42209  | H                                      | -1.71428 | -1.55215 | -7.42083  |
| H                               | 0.28540  | 2.38062  | -7.44576  | H                                      | 0.28169  | 2.37310  | -7.44441  |
| H                               | -2.77328 | 1.45010  | -8.48669  | H                                      | -2.76593 | 1.44635  | -8.48869  |
| H                               | 1.15274  | -0.54844 | -8.85048  | H                                      | 1.14519  | -0.54460 | -8.85110  |

|                                 |          |          |           |
|---------------------------------|----------|----------|-----------|
| 6-311++G(d,p)                   |          |          |           |
| Electronic energy: -347.7771241 |          |          |           |
| Hartree                         |          |          |           |
| C                               | -1.22583 | -0.65314 | -7.08835  |
| C                               | -0.76333 | 0.43068  | -8.05125  |
| C                               | -0.15536 | 1.45202  | -7.10100  |
| C                               | -0.26081 | 1.01439  | -5.83475  |
| C                               | -0.92819 | -0.29806 | -5.82687  |
| C                               | -1.88486 | 0.99580  | -8.91066  |
| C                               | -1.58604 | 0.83601  | -10.21111 |
| C                               | -0.27832 | 0.17032  | -10.33228 |
| C                               | 0.21272  | -0.07198 | -9.10501  |
| H                               | 0.20103  | -0.07907 | -11.27041 |
| H                               | -2.20035 | 1.14335  | -11.04791 |
| H                               | 0.08573  | 1.53421  | -4.95058  |
| H                               | -1.13977 | -0.87585 | -4.93611  |
| H                               | -1.71673 | -1.55682 | -7.42159  |
| H                               | 0.28402  | 2.37782  | -7.44522  |
| H                               | -2.77055 | 1.44871  | -8.48747  |
| H                               | 1.14993  | -0.54701 | -8.85074  |

**B3LYP, restricted open shell singlet**

6-31+G(d,p)

Electronic energy: -347.7130495

Hartree

|   |          |          |           |
|---|----------|----------|-----------|
| C | -1.22639 | -0.65433 | -7.08778  |
| C | -0.76333 | 0.43068  | -8.05125  |
| C | -0.15472 | 1.45318  | -7.10044  |
| C | -0.26021 | 1.01466  | -5.82969  |
| C | -0.92802 | -0.29866 | -5.82181  |
| C | -1.88607 | 0.99641  | -8.91111  |
| C | -1.58686 | 0.83640  | -10.21613 |
| C | -0.27827 | 0.17026  | -10.33738 |
| C | 0.21385  | -0.07256 | -9.10568  |
| H | 0.20212  | -0.07967 | -11.27712 |
| H | -2.20244 | 1.14437  | -11.05432 |
| H | 0.08704  | 1.53560  | -4.94403  |
| H | -1.14009 | -0.87766 | -4.92954  |
| H | -1.71818 | -1.55958 | -7.42209  |
| H | 0.28540  | 2.38062  | -7.44576  |
| H | -2.77328 | 1.45010  | -8.48669  |
| H | 1.15274  | -0.54844 | -8.85048  |

Aug-cc-pVTZ

Electronic energy: -347.809437 Hartree

|   |          |          |           |
|---|----------|----------|-----------|
| C | -1.22441 | -0.65014 | -7.08944  |
| C | -0.76333 | 0.43068  | -8.05125  |
| C | -0.15695 | 1.44909  | -7.10205  |
| C | -0.26190 | 1.01310  | -5.83943  |
| C | -0.92781 | -0.29646 | -5.83157  |
| C | -1.88182 | 0.99426  | -8.90985  |
| C | -1.58425 | 0.83513  | -10.20655 |
| C | -0.27939 | 0.17090  | -10.32746 |
| C | 0.20985  | -0.07051 | -9.10367  |
| H | 0.19954  | -0.07827 | -11.26303 |
| H | -2.19777 | 1.14207  | -11.04089 |
| H | 0.08414  | 1.53240  | -4.95777  |
| H | -1.13929 | -0.87357 | -4.94332  |
| H | -1.71428 | -1.55215 | -7.42083  |
| H | 0.28169  | 2.37310  | -7.44441  |
| H | -2.76593 | 1.44635  | -8.48869  |
| H | 1.14519  | -0.54460 | -8.85110  |

6-311++G(d,p)

Electronic energy: -347.7771241

Hartree

|   |          |          |           |
|---|----------|----------|-----------|
| C | -1.22583 | -0.65314 | -7.08835  |
| C | -0.76333 | 0.43068  | -8.05125  |
| C | -0.15536 | 1.45202  | -7.10100  |
| C | -0.26081 | 1.01439  | -5.83475  |
| C | -0.92819 | -0.29806 | -5.82687  |
| C | -1.88486 | 0.99580  | -8.91066  |
| C | -1.58604 | 0.83602  | -10.21111 |
| C | -0.27832 | 0.17032  | -10.33228 |
| C | 0.21272  | -0.07198 | -9.10501  |
| H | 0.20103  | -0.07907 | -11.27041 |
| H | -2.20035 | 1.14335  | -11.04791 |
| H | 0.08573  | 1.53421  | -4.95058  |
| H | -1.13977 | -0.87585 | -4.93611  |
| H | -1.71673 | -1.55682 | -7.42159  |
| H | 0.28402  | 2.37782  | -7.44522  |
| H | -2.77055 | 1.44871  | -8.48747  |
| H | 1.14993  | -0.54701 | -8.85074  |

**B3LYP, triplet**

6-31+G(d,p)

Electronic energy: -347.6321618

Hartree

|   |          |          |           |
|---|----------|----------|-----------|
| C | -1.22214 | -0.64316 | -7.10314  |
| C | -0.76541 | 0.43155  | -8.07825  |
| C | -0.16133 | 1.44299  | -7.11569  |
| C | -0.27808 | 0.96435  | -5.74644  |
| C | -0.89750 | -0.25378 | -5.73911  |
| C | -1.88593 | 0.99615  | -8.94073  |
| C | -1.58672 | 0.83614  | -10.25078 |
| C | -0.28362 | 0.17279  | -10.37152 |
| C | 0.20921  | -0.07039 | -9.13485  |
| H | 0.19351  | -0.07547 | -11.31367 |
| H | -2.19943 | 1.14265  | -11.09196 |
| H | 0.07760  | 1.50478  | -4.87707  |
| H | -1.12042 | -0.85122 | -4.86289  |
| H | -1.71548 | -1.55601 | -7.41227  |
| H | 0.28413  | 2.37640  | -7.43594  |
| H | -2.77359 | 1.45006  | -8.51682  |
| H | 1.14847  | -0.54646 | -8.88021  |

Aug-cc-pVTZ

Electronic energy: -347.7447937

Hartree

|   |          |          |           |
|---|----------|----------|-----------|
| C | -1.22042 | -0.63924 | -7.10614  |
| C | -0.76543 | 0.43156  | -8.07856  |
| C | -0.16351 | 1.43927  | -7.11864  |
| C | -0.28058 | 0.96111  | -5.75566  |
| C | -0.89639 | -0.24993 | -5.74837  |
| C | -1.88161 | 0.99396  | -8.93942  |
| C | -1.58398 | 0.83480  | -10.24127 |
| C | -0.28488 | 0.17350  | -10.36163 |
| C | 0.20514  | -0.06831 | -9.13276  |
| H | 0.19078  | -0.07400 | -11.29959 |
| H | -2.19461 | 1.14028  | -11.07858 |
| H | 0.07298  | 1.49782  | -4.88874  |
| H | -1.11757 | -0.84350 | -4.87464  |
| H | -1.71175 | -1.54862 | -7.41257  |
| H | 0.28035  | 2.36903  | -7.43615  |
| H | -2.76597 | 1.44618  | -8.51832  |
| H | 1.14072  | -0.54253 | -8.88027  |

6-311++G(d,p)

Electronic energy: -347.6953524

Hartree

|   |          |          |           |
|---|----------|----------|-----------|
| C | -1.22189 | -0.64234 | -7.10491  |
| C | -0.76542 | 0.43155  | -8.07834  |
| C | -0.16186 | 1.44230  | -7.11746  |
| C | -0.27933 | 0.96272  | -5.75092  |
| C | -0.89693 | -0.25185 | -5.74361  |
| C | -1.88472 | 0.99553  | -8.94021  |
| C | -1.58582 | 0.83571  | -10.24574 |
| C | -0.28374 | 0.17289  | -10.36638 |
| C | 0.20809  | -0.06982 | -9.13411  |
| H | 0.19238  | -0.07485 | -11.30688 |
| H | -2.19728 | 1.14160  | -11.08548 |
| H | 0.07518  | 1.50095  | -4.88224  |
| H | -1.11877 | -0.84704 | -4.86810  |
| H | -1.71433 | -1.55361 | -7.41297  |
| H | 0.28286  | 2.37405  | -7.43662  |
| H | -2.77074 | 1.44861  | -8.51723  |
| H | 1.14559  | -0.54500 | -8.88008  |

### *B3LYP, quintuplet*

6-31+G(d,p)

Electronic energy: -347.5431128

Hartree

|   |          |          |           |
|---|----------|----------|-----------|
| C | -1.21542 | -0.64009 | -7.04805  |
| C | -0.76334 | 0.43063  | -8.05126  |
| C | -0.15960 | 1.43628  | -7.06059  |
| C | -0.27413 | 0.96180  | -5.68932  |
| C | -0.89282 | -0.25489 | -5.68197  |
| C | -1.87361 | 0.98976  | -8.95232  |
| C | -1.54935 | 0.81653  | -10.36068 |
| C | -0.33705 | 0.19941  | -10.47303 |
| C | 0.19528  | -0.06341 | -9.14405  |
| H | 0.16385  | -0.06078 | -11.39831 |
| H | -2.18293 | 1.13383  | -11.18082 |
| H | 0.08168  | 1.50262  | -4.82005  |
| H | -1.11595 | -0.85263 | -4.80583  |
| H | -1.71007 | -1.55734 | -7.34762  |
| H | 0.28871  | 2.37340  | -7.37136  |
| H | -2.77428 | 1.45000  | -8.56154  |
| H | 1.14230  | -0.54373 | -8.92451  |

Aug-cc-pVTZ

Electronic energy: -347.6367283

Hartree

|   |          |          |           |
|---|----------|----------|-----------|
| C | -1.21373 | -0.63622 | -7.05089  |
| C | -0.76335 | 0.43062  | -8.05125  |
| C | -0.16174 | 1.43260  | -7.06341  |
| C | -0.27664 | 0.95856  | -5.69858  |
| C | -0.89170 | -0.25103 | -5.69126  |
| C | -1.86964 | 0.98773  | -8.94984  |
| C | -1.54510 | 0.81445  | -10.35174 |
| C | -0.33986 | 0.20093  | -10.46343 |
| C | 0.19173  | -0.06161 | -9.14087  |
| H | 0.15749  | -0.05741 | -11.38583 |
| H | -2.17471 | 1.12979  | -11.16970 |
| H | 0.07709  | 1.49571  | -4.83182  |
| H | -1.11311 | -0.84493 | -4.81766  |
| H | -1.70634 | -1.54997 | -7.34770  |
| H | 0.28494  | 2.36604  | -7.37141  |
| H | -2.76698 | 1.44620  | -8.56216  |
| H | 1.13494  | -0.54006 | -8.92375  |

6-311++G(d,p)

Electronic energy: -347.6053226

Hartree

|   |          |          |           |
|---|----------|----------|-----------|
| C | -1.21525 | -0.63941 | -7.04990  |
| C | -0.76334 | 0.43062  | -8.05125  |
| C | -0.16006 | 1.43571  | -7.06245  |
| C | -0.27539 | 0.96018  | -5.69402  |
| C | -0.89226 | -0.25295 | -5.68668  |
| C | -1.87285 | 0.98936  | -8.95053  |
| C | -1.54721 | 0.81549  | -10.35614 |
| C | -0.33845 | 0.20017  | -10.46816 |
| C | 0.19480  | -0.06317 | -9.14215  |
| H | 0.16029  | -0.05889 | -11.39251 |
| H | -2.17850 | 1.13166  | -11.17577 |
| H | 0.07924  | 1.49880  | -4.82546  |
| H | -1.11432 | -0.84844 | -4.81126  |
| H | -1.70897 | -1.55504 | -7.34844  |
| H | 0.28748  | 2.37114  | -7.37220  |
| H | -2.77197 | 1.44877  | -8.56092  |
| H | 1.14007  | -0.54265 | -8.92347  |

***B3LYP[GD3BJ], closed-shell singlet***

6-31+G(d,p)

Electronic energy: -347.8438239

Hartree

|   |          |          |           |
|---|----------|----------|-----------|
| C | -1.22676 | -0.65442 | -7.09131  |
| C | -0.76333 | 0.43068  | -8.05125  |
| C | -0.15489 | 1.45349  | -7.10397  |
| C | -0.26043 | 1.01491  | -5.83352  |
| C | -0.92838 | -0.29866 | -5.82563  |
| C | -1.88600 | 0.99640  | -8.90756  |
| C | -1.58669 | 0.83634  | -10.21229 |
| C | -0.27785 | 0.17007  | -10.33357 |
| C | 0.21431  | -0.07277 | -9.10218  |
| H | 0.20172  | -0.07945 | -11.27342 |
| H | -2.20149 | 1.14391  | -11.05074 |
| H | 0.08642  | 1.53503  | -4.94767  |
| H | -1.14002 | -0.87686 | -4.93318  |
| H | -1.71799 | -1.55790 | -7.42932  |
| H | 0.28411  | 2.37941  | -7.45296  |
| H | -2.77129 | 1.44914  | -8.47961  |
| H | 1.15185  | -0.54794 | -8.84313  |

Aug-cc-pVTZ

Electronic energy: -347.8114733

Hartree

|   |          |          |           |
|---|----------|----------|-----------|
| C | -1.22483 | -0.65035 | -7.09287  |
| C | -0.76333 | 0.43068  | -8.05125  |
| C | -0.15705 | 1.44952  | -7.10548  |
| C | -0.26209 | 1.01341  | -5.84313  |
| C | -0.92819 | -0.29654 | -5.83526  |
| C | -1.88188 | 0.99431  | -8.90639  |
| C | -1.58416 | 0.83511  | -10.20284 |
| C | -0.27892 | 0.17068  | -10.32378 |
| C | 0.21043  | -0.07078 | -9.10027  |
| H | 0.19915  | -0.07805 | -11.25949 |
| H | -2.19685 | 1.14162  | -11.03748 |
| H | 0.08354  | 1.53186  | -4.96124  |
| H | -1.13921 | -0.87279 | -4.94680  |
| H | -1.71414 | -1.55058 | -7.42800  |
| H | 0.28047  | 2.37200  | -7.45156  |
| H | -2.76405 | 1.44544  | -8.48165  |
| H | 1.14440  | -0.54415 | -8.84381  |

6-311++G(d,p)

Electronic energy: -347.7453257

Hartree

|   |          |          |           |
|---|----------|----------|-----------|
| C | -1.22622 | -0.65326 | -7.09183  |
| C | -0.76333 | 0.43068  | -8.05125  |
| C | -0.15551 | 1.45236  | -7.10447  |
| C | -0.26102 | 1.01466  | -5.83851  |
| C | -0.92855 | -0.29809 | -5.83063  |
| C | -1.88483 | 0.99580  | -8.90715  |
| C | -1.58590 | 0.83597  | -10.20734 |
| C | -0.27788 | 0.17012  | -10.32854 |
| C | 0.21321  | -0.07221 | -9.10156  |
| H | 0.20064  | -0.07886 | -11.26678 |
| H | -2.19942 | 1.14289  | -11.04439 |
| H | 0.08512  | 1.53367  | -4.95416  |
| H | -1.13971 | -0.87507 | -4.93969  |
| H | -1.71655 | -1.55515 | -7.42881  |
| H | 0.28275  | 2.37663  | -7.45242  |
| H | -2.76857 | 1.44775  | -8.48039  |
| H | 1.14905  | -0.54652 | -8.84339  |

***B3LYP/GD3BJ, restricted open shell singlet***

6-31+G(d,p)

Electronic energy: -347.8438239

Hartree

|   |          |          |           |
|---|----------|----------|-----------|
| C | -1.22676 | -0.65442 | -7.09131  |
| C | -0.76333 | 0.43068  | -8.05125  |
| C | -0.15489 | 1.45349  | -7.10397  |
| C | -0.26043 | 1.01491  | -5.83352  |
| C | -0.92838 | -0.29866 | -5.82563  |
| C | -1.88600 | 0.99640  | -8.90756  |
| C | -1.58669 | 0.83634  | -10.21229 |
| C | -0.27785 | 0.17007  | -10.33357 |
| C | 0.21431  | -0.07277 | -9.10218  |
| H | 0.20172  | -0.07945 | -11.27342 |
| H | -2.20149 | 1.14391  | -11.05074 |
| H | 0.08642  | 1.53503  | -4.94767  |
| H | -1.14002 | -0.87686 | -4.93318  |
| H | -1.71799 | -1.55790 | -7.42932  |
| H | 0.28411  | 2.37941  | -7.45296  |
| H | -2.77129 | 1.44914  | -8.47961  |
| H | 1.15185  | -0.54794 | -8.84313  |

Aug-cc-pVTZ

Electronic energy: -347.8114733

Hartree

|   |          |          |           |
|---|----------|----------|-----------|
| C | -1.22483 | -0.65035 | -7.09287  |
| C | -0.76333 | 0.43068  | -8.05125  |
| C | -0.15705 | 1.44952  | -7.10548  |
| C | -0.26209 | 1.01341  | -5.84313  |
| C | -0.92819 | -0.29654 | -5.83526  |
| C | -1.88188 | 0.99431  | -8.90639  |
| C | -1.58416 | 0.83511  | -10.20284 |
| C | -0.27892 | 0.17068  | -10.32378 |
| C | 0.21043  | -0.07078 | -9.10027  |
| H | 0.19915  | -0.07805 | -11.25949 |
| H | -2.19685 | 1.14162  | -11.03748 |
| H | 0.08354  | 1.53186  | -4.96124  |
| H | -1.13921 | -0.87279 | -4.94680  |
| H | -1.71414 | -1.55058 | -7.42800  |
| H | 0.28047  | 2.37200  | -7.45156  |
| H | -2.76405 | 1.44544  | -8.48165  |
| H | 1.14440  | -0.54415 | -8.84381  |

6-311++G(d,p)

Electronic energy: -347.7453257

Hartree

|   |          |          |           |
|---|----------|----------|-----------|
| C | -1.22622 | -0.65326 | -7.09183  |
| C | -0.76333 | 0.43068  | -8.05125  |
| C | -0.15551 | 1.45236  | -7.10447  |
| C | -0.26102 | 1.01466  | -5.83851  |
| C | -0.92855 | -0.29809 | -5.83063  |
| C | -1.88483 | 0.99580  | -8.90715  |
| C | -1.58590 | 0.83597  | -10.20734 |
| C | -0.27788 | 0.17012  | -10.32854 |
| C | 0.21321  | -0.07221 | -9.10156  |
| H | 0.20064  | -0.07886 | -11.26678 |
| H | -2.19942 | 1.14289  | -11.04439 |
| H | 0.08512  | 1.53367  | -4.95416  |
| H | -1.13971 | -0.87507 | -4.93969  |
| H | -1.71655 | -1.55515 | -7.42881  |
| H | 0.28275  | 2.37663  | -7.45242  |
| H | -2.76857 | 1.44775  | -8.48039  |
| H | 1.14905  | -0.54652 | -8.84339  |



**B3LYP/GD3BJ, triplet**

6-31+G(d,p)

Electronic energy: -347.761192 Hartree

|   |          |          |           |
|---|----------|----------|-----------|
| C | -1.22273 | -0.64367 | -7.10667  |
| C | -0.76540 | 0.43155  | -8.07811  |
| C | -0.16129 | 1.44374  | -7.11923  |
| C | -0.27836 | 0.96459  | -5.75081  |
| C | -0.89787 | -0.25373 | -5.74347  |
| C | -1.88576 | 0.99608  | -8.93694  |
| C | -1.58647 | 0.83604  | -10.24682 |
| C | -0.28327 | 0.17264  | -10.36756 |
| C | 0.20961  | -0.07057 | -9.13107  |
| H | 0.19307  | -0.07522 | -11.30980 |
| H | -2.19840 | 1.14215  | -11.08823 |
| H | 0.07686  | 1.50404  | -4.88109  |
| H | -1.12027 | -0.85022 | -4.86692  |
| H | -1.71554 | -1.55483 | -7.41940  |
| H | 0.28310  | 2.37569  | -7.44306  |
| H | -2.77150 | 1.44904  | -8.50951  |
| H | 1.14750  | -0.54593 | -8.87260  |

Aug-cc-pVTZ

Electronic energy: -347.729165 Hartree

|   |          |          |           |
|---|----------|----------|-----------|
| C | -1.22108 | -0.63988 | -7.10959  |
| C | -0.76543 | 0.43155  | -8.07840  |
| C | -0.16339 | 1.44014  | -7.12211  |
| C | -0.28084 | 0.96137  | -5.75991  |
| C | -0.89678 | -0.24992 | -5.75262  |
| C | -1.88157 | 0.99396  | -8.93570  |
| C | -1.58380 | 0.83474  | -10.23741 |
| C | -0.28447 | 0.17331  | -10.35779 |
| C | 0.20567  | -0.06856 | -9.12908  |
| H | 0.19035  | -0.07375 | -11.29587 |
| H | -2.19361 | 1.13980  | -11.07500 |
| H | 0.07226  | 1.49708  | -4.89263  |
| H | -1.11741 | -0.84250 | -4.87854  |
| H | -1.71187 | -1.54756 | -7.41967  |
| H | 0.27938  | 2.36843  | -7.44324  |
| H | -2.76400 | 1.44522  | -8.51104  |
| H | 1.13987  | -0.54205 | -8.87272  |

6-311++G(d,p)

Electronic energy: -347.6641108

Hartree

|   |          |          |           |
|---|----------|----------|-----------|
| C | -1.60934 | -0.56747 | -6.84338  |
| C | -1.29416 | 0.25676  | -8.01658  |
| C | -0.13266 | 1.18709  | -7.54756  |
| C | 0.14570  | 0.74706  | -6.15869  |
| C | -0.72402 | -0.26935 | -5.79832  |
| C | -2.16977 | 0.69088  | -9.11200  |
| C | -1.40930 | 0.93194  | -10.26456 |
| C | -0.07274 | 0.63834  | -10.04830 |
| C | 0.12739  | 0.17269  | -8.65433  |
| H | 0.72912  | 0.76251  | -10.76315 |
| H | -1.81018 | 1.32637  | -11.18953 |
| H | 0.94377  | 1.14704  | -5.54835  |
| H | -0.70321 | -0.78828 | -4.84852  |
| H | -2.39710 | -1.30754 | -6.82028  |
| H | -0.13683 | 2.23625  | -7.82334  |
| H | -3.23830 | 0.82281  | -9.01385  |
| H | 0.77490  | -0.66571 | -8.42056  |

**B3LYP/GD3BJ, quintuplet**

6-31+G(d,p)

Electronic energy: -347.6699399

Hartree

|   |          |          |           |
|---|----------|----------|-----------|
| C | -1.21591 | -0.64041 | -7.05154  |
| C | -0.76334 | 0.43062  | -8.05125  |
| C | -0.15965 | 1.43682  | -7.06409  |
| C | -0.27442 | 0.96200  | -5.69353  |
| C | -0.89316 | -0.25480 | -5.68618  |
| C | -1.87377 | 0.98985  | -8.94879  |
| C | -1.54909 | 0.81643  | -10.35647 |
| C | -0.33666 | 0.19925  | -10.46883 |
| C | 0.19598  | -0.06375 | -9.14061  |
| H | 0.16337  | -0.06049 | -11.39427 |
| H | -2.18182 | 1.13332  | -11.17693 |
| H | 0.08098  | 1.50196  | -4.82401  |
| H | -1.11585 | -0.85170 | -4.80979  |
| H | -1.71006 | -1.55607 | -7.35448  |
| H | 0.28765  | 2.37257  | -7.37823  |
| H | -2.77273 | 1.44922  | -8.55477  |
| H | 1.14178  | -0.54344 | -8.91755  |

Aug-cc-pVTZ

Electronic energy: -347.6384952

Hartree

|   |          |          |           |
|---|----------|----------|-----------|
| C | -1.21428 | -0.63669 | -7.05434  |
| C | -0.76335 | 0.43060  | -8.05125  |
| C | -0.16172 | 1.43328  | -7.06689  |
| C | -0.27690 | 0.95880  | -5.70274  |
| C | -0.89206 | -0.25097 | -5.69540  |
| C | -1.86996 | 0.98789  | -8.94632  |
| C | -1.54486 | 0.81438  | -10.34758 |
| C | -0.33945 | 0.20077  | -10.45929 |
| C | 0.19255  | -0.06203 | -9.13746  |
| H | 0.15701  | -0.05708 | -11.38188 |
| H | -2.17359 | 1.12930  | -11.16590 |
| H | 0.07639  | 1.49505  | -4.83570  |
| H | -1.11299 | -0.84398 | -4.82153  |
| H | -1.70640 | -1.54884 | -7.35456  |
| H | 0.28394  | 2.36533  | -7.37830  |
| H | -2.76557 | 1.44545  | -8.55536  |
| H | 1.13451  | -0.53987 | -8.91679  |

6-311++G(d,p)

Electronic energy: -347.5744754

Hartree

|   |          |          |           |
|---|----------|----------|-----------|
| C | -1.21575 | -0.63977 | -7.05337  |
| C | -0.76335 | 0.43060  | -8.05125  |
| C | -0.16009 | 1.43629  | -7.06594  |
| C | -0.27568 | 0.96040  | -5.69822  |
| C | -0.89262 | -0.25287 | -5.69086  |
| C | -1.87306 | 0.98947  | -8.94700  |
| C | -1.54695 | 0.81541  | -10.35195 |
| C | -0.33805 | 0.20002  | -10.46398 |
| C | 0.19552  | -0.06354 | -9.13871  |
| H | 0.15983  | -0.05858 | -11.38849 |
| H | -2.17739 | 1.13118  | -11.17189 |
| H | 0.07854  | 1.49817  | -4.82941  |
| H | -1.11422 | -0.84750 | -4.81520  |
| H | -1.70897 | -1.55380 | -7.35532  |
| H | 0.28643  | 2.37033  | -7.37911  |
| H | -2.77045 | 1.44797  | -8.55412  |
| H | 1.13955  | -0.54240 | -8.91648  |

**BLYP, closed-shell singlet**

6-31+G(d,p)

Electronic energy: -347.5476871

Hartree

|   |          |          |           |
|---|----------|----------|-----------|
| C | -1.22999 | -0.66275 | -7.08041  |
| C | -0.76333 | 0.43068  | -8.05125  |
| C | -0.15001 | 1.46112  | -7.09316  |
| C | -0.25734 | 1.01702  | -5.81178  |
| C | -0.92816 | -0.30219 | -5.80386  |
| C | -1.89478 | 1.00080  | -8.91768  |
| C | -1.59115 | 0.83848  | -10.23379 |
| C | -0.27670 | 0.16935  | -10.35558 |
| C | 0.22144  | -0.07647 | -9.11376  |
| H | 0.20624  | -0.08192 | -11.30178 |
| H | -2.21023 | 1.14818  | -11.07788 |
| H | 0.09191  | 1.54078  | -4.91996  |
| H | -1.14129 | -0.88442 | -4.90540  |
| H | -1.72473 | -1.57325 | -7.41770  |
| H | 0.29260  | 2.39401  | -7.44153  |
| H | -2.78709 | 1.45711  | -8.48976  |
| H | 1.16589  | -0.55515 | -8.85603  |

Aug-cc-pVTZ

Electronic energy: -347.6503823

Hartree

|   |          |          |           |
|---|----------|----------|-----------|
| C | -1.22788 | -0.65826 | -7.08233  |
| C | -0.76333 | 0.43068  | -8.05125  |
| C | -0.15240 | 1.45675  | -7.09503  |
| C | -0.25924 | 1.01526  | -5.82254  |
| C | -0.92790 | -0.29973 | -5.81464  |
| C | -1.89023 | 0.99850  | -8.91619  |
| C | -1.58823 | 0.83706  | -10.22322 |
| C | -0.27798 | 0.17007  | -10.34462 |
| C | 0.21718  | -0.07428 | -9.11146  |
| H | 0.20295  | -0.08015 | -11.28615 |
| H | -2.20463 | 1.14542  | -11.06307 |
| H | 0.08849  | 1.53681  | -4.93515  |
| H | -1.14018 | -0.87946 | -4.92064  |
| H | -1.72039 | -1.56495 | -7.41638  |
| H | 0.28847  | 2.38562  | -7.44010  |
| H | -2.77888 | 1.45292  | -8.49190  |
| H | 1.15748  | -0.55088 | -8.85664  |

6-311++G(d,p)

Electronic energy: -347.616685 Hartree

|   |          |          |           |
|---|----------|----------|-----------|
| C | -1.22938 | -0.66143 | -7.08105  |
| C | -0.76333 | 0.43068  | -8.05125  |
| C | -0.15072 | 1.45984  | -7.09379  |
| C | -0.25807 | 1.01661  | -5.81743  |
| C | -0.92829 | -0.30142 | -5.80952  |
| C | -1.89344 | 1.00012  | -8.91716  |
| C | -1.59014 | 0.83800  | -10.22819 |
| C | -0.27685 | 0.16947  | -10.34988 |
| C | 0.22019  | -0.07583 | -9.11301  |
| H | 0.20462  | -0.08104 | -11.29407 |
| H | -2.20746 | 1.14682  | -11.07057 |
| H | 0.09023  | 1.53882  | -4.92745  |
| H | -1.14074 | -0.88198 | -4.91291  |
| H | -1.72296 | -1.56990 | -7.41698  |
| H | 0.29094  | 2.39061  | -7.44076  |
| H | -2.78379 | 1.45542  | -8.49081  |
| H | 1.16247  | -0.55342 | -8.85646  |

**BLYP, restricted open shell singlet**

6-31+G(d,p)

Electronic energy: -347.5476871

Hartree

|   |          |          |           |
|---|----------|----------|-----------|
| C | -1.22999 | -0.66275 | -7.08041  |
| C | -0.76333 | 0.43068  | -8.05125  |
| C | -0.15001 | 1.46112  | -7.09316  |
| C | -0.25734 | 1.01702  | -5.81178  |
| C | -0.92816 | -0.30219 | -5.80386  |
| C | -1.89478 | 1.00080  | -8.91768  |
| C | -1.59115 | 0.83848  | -10.23379 |
| C | -0.27670 | 0.16935  | -10.35558 |
| C | 0.22144  | -0.07647 | -9.11376  |
| H | 0.20624  | -0.08192 | -11.30178 |
| H | -2.21023 | 1.14818  | -11.07788 |
| H | 0.09191  | 1.54078  | -4.91996  |
| H | -1.14129 | -0.88442 | -4.90540  |
| H | -1.72473 | -1.57325 | -7.41770  |
| H | 0.29260  | 2.39401  | -7.44153  |
| H | -2.78709 | 1.45711  | -8.48976  |
| H | 1.16589  | -0.55515 | -8.85603  |

Aug-cc-pVTZ

Electronic energy: -347.6503823

Hartree

|   |          |          |           |
|---|----------|----------|-----------|
| C | -1.22788 | -0.65826 | -7.08233  |
| C | -0.76333 | 0.43068  | -8.05125  |
| C | -0.15240 | 1.45675  | -7.09503  |
| C | -0.25924 | 1.01526  | -5.82254  |
| C | -0.92790 | -0.29973 | -5.81464  |
| C | -1.89023 | 0.99850  | -8.91619  |
| C | -1.58823 | 0.83706  | -10.22322 |
| C | -0.27798 | 0.17007  | -10.34462 |
| C | 0.21718  | -0.07428 | -9.11146  |
| H | 0.20295  | -0.08015 | -11.28615 |
| H | -2.20463 | 1.14542  | -11.06307 |
| H | 0.08849  | 1.53681  | -4.93515  |
| H | -1.14018 | -0.87946 | -4.92064  |
| H | -1.72039 | -1.56495 | -7.41638  |
| H | 0.28847  | 2.38562  | -7.44010  |
| H | -2.77888 | 1.45292  | -8.49190  |
| H | 1.15748  | -0.55088 | -8.85664  |

6-311++G(d,p)

Electronic energy: -347.616685 Hartree

|   |          |          |           |
|---|----------|----------|-----------|
| C | -1.22938 | -0.66143 | -7.08105  |
| C | -0.76333 | 0.43068  | -8.05125  |
| C | -0.15072 | 1.45984  | -7.09379  |
| C | -0.25807 | 1.01661  | -5.81743  |
| C | -0.92829 | -0.30142 | -5.80952  |
| C | -1.89344 | 1.00012  | -8.91716  |
| C | -1.59014 | 0.83800  | -10.22819 |
| C | -0.27685 | 0.16947  | -10.34988 |
| C | 0.22019  | -0.07583 | -9.11301  |
| H | 0.20462  | -0.08104 | -11.29407 |
| H | -2.20746 | 1.14682  | -11.07057 |
| H | 0.09023  | 1.53882  | -4.92745  |
| H | -1.14074 | -0.88198 | -4.91291  |
| H | -1.72296 | -1.56990 | -7.41698  |
| H | 0.29094  | 2.39061  | -7.44076  |
| H | -2.78379 | 1.45542  | -8.49081  |
| H | 1.16247  | -0.55342 | -8.85646  |

**BLYP, triplet**

6-31+G(d,p)

Electronic energy: -347.4678201

Hartree

|   |          |          |           |
|---|----------|----------|-----------|
| C | -1.22567 | -0.65168 | -7.09449  |
| C | -0.76519 | 0.43145  | -8.07537  |
| C | -0.15649 | 1.45095  | -7.10714  |
| C | -0.27334 | 0.97123  | -5.73302  |
| C | -0.90020 | -0.26153 | -5.72560  |
| C | -1.89290 | 0.99967  | -8.94394  |
| C | -1.58989 | 0.83765  | -10.26772 |
| C | -0.28305 | 0.17240  | -10.38880 |
| C | 0.21560  | -0.07366 | -9.13930  |
| H | 0.19653  | -0.07715 | -11.33754 |
| H | -2.20601 | 1.14586  | -11.11493 |
| H | 0.08470  | 1.51533  | -4.85828  |
| H | -1.12466 | -0.86298 | -4.84397  |
| H | -1.72188 | -1.56923 | -7.40889  |
| H | 0.29105  | 2.38939  | -7.43272  |
| H | -2.78587 | 1.45631  | -8.51697  |
| H | 1.16056  | -0.55262 | -8.88262  |

Aug-cc-pVTZ

Electronic energy: -347.5690666

Hartree

|   |          |          |           |
|---|----------|----------|-----------|
| C | -1.22387 | -0.64751 | -7.09791  |
| C | -0.76522 | 0.43147  | -8.07580  |
| C | -0.15881 | 1.44701  | -7.11052  |
| C | -0.27609 | 0.96768  | -5.74326  |
| C | -0.89900 | -0.25732 | -5.73588  |
| C | -1.88828 | 0.99733  | -8.94229  |
| C | -1.58678 | 0.83613  | -10.25714 |
| C | -0.28452 | 0.17321  | -10.37780 |
| C | 0.21130  | -0.07146 | -9.13682  |
| H | 0.19307  | -0.07530 | -11.32181 |
| H | -2.20022 | 1.14301  | -11.10006 |
| H | 0.07959  | 1.50770  | -4.87159  |
| H | -1.12157 | -0.85449 | -4.85737  |
| H | -1.71774 | -1.56100 | -7.40927  |
| H | 0.28684  | 2.38119  | -7.43300  |
| H | -2.77735 | 1.45196  | -8.51837  |
| H | 1.15193  | -0.54824 | -8.88242  |

6-311++G(d,p)

Electronic energy: -347.5358206

Hartree

|   |          |          |           |
|---|----------|----------|-----------|
| C | -1.22540 | -0.65077 | -7.09645  |
| C | -0.76520 | 0.43145  | -8.07549  |
| C | -0.15707 | 1.45017  | -7.10909  |
| C | -0.27472 | 0.96944  | -5.73815  |
| C | -0.89959 | -0.25942 | -5.73075  |
| C | -1.89158 | 0.99900  | -8.94327  |
| C | -1.58874 | 0.83710  | -10.26205 |
| C | -0.28332 | 0.17258  | -10.38300 |
| C | 0.21439  | -0.07305 | -9.13839  |
| H | 0.19485  | -0.07624 | -11.32967 |
| H | -2.20316 | 1.14446  | -11.10749 |
| H | 0.08191  | 1.51096  | -4.86450  |
| H | -1.12281 | -0.85821 | -4.85024  |
| H | -1.72043 | -1.56626 | -7.40949  |
| H | 0.28950  | 2.38646  | -7.43328  |
| H | -2.78245 | 1.45456  | -8.51750  |
| H | 1.15709  | -0.55086 | -8.88251  |

***BLYP, quintuplet***

6-31+G(d,p)

Electronic energy: -347.3762842

Hartree

|   |          |          |           |
|---|----------|----------|-----------|
| C | -1.21828 | -0.64755 | -7.03815  |
| C | -0.76333 | 0.43061  | -8.05126  |
| C | -0.15521 | 1.44306  | -7.05080  |
| C | -0.26946 | 0.96792  | -5.67214  |
| C | -0.89491 | -0.26209 | -5.66470  |
| C | -1.88146 | 0.99367  | -8.96150  |
| C | -1.55730 | 0.82049  | -10.37728 |
| C | -0.33172 | 0.19662  | -10.49088 |
| C | 0.20163  | -0.06672 | -9.15457  |
| H | 0.17284  | -0.06544 | -11.42176 |
| H | -2.19533 | 1.14007  | -11.20226 |
| H | 0.08880  | 1.51267  | -4.79767  |
| H | -1.11976 | -0.86406 | -4.78330  |
| H | -1.71605 | -1.57048 | -7.34089  |
| H | 0.29583  | 2.38603  | -7.36484  |
| H | -2.78765 | 1.45669  | -8.56695  |
| H | 1.15462  | -0.55010 | -8.93235  |

Aug-cc-pVTZ

Electronic energy: -347.4758644

Hartree

|   |          |          |           |
|---|----------|----------|-----------|
| C | -1.21649 | -0.64351 | -7.04146  |
| C | -0.76333 | 0.43055  | -8.05126  |
| C | -0.15745 | 1.43920  | -7.05415  |
| C | -0.27225 | 0.96443  | -5.68256  |
| C | -0.89374 | -0.25780 | -5.67511  |
| C | -1.87731 | 0.99147  | -8.95852  |
| C | -1.55259 | 0.81828  | -10.36721 |
| C | -0.33477 | 0.19836  | -10.48011 |
| C | 0.19790  | -0.06490 | -9.15090  |
| H | 0.16592  | -0.06159 | -11.40749 |
| H | -2.18619 | 1.13575  | -11.18944 |
| H | 0.08363  | 1.50516  | -4.81121  |
| H | -1.11672 | -0.85545 | -4.79683  |
| H | -1.71180 | -1.56237 | -7.34111  |
| H | 0.29173  | 2.37778  | -7.36514  |
| H | -2.77959 | 1.45226  | -8.56742  |
| H | 1.14635  | -0.54622 | -8.93138  |

6-311++G(d,p)

Electronic energy: -347.4431739

Hartree

|   |          |          |           |
|---|----------|----------|-----------|
| C | -1.21809 | -0.64685 | -7.04021  |
| C | -0.76333 | 0.43056  | -8.05126  |
| C | -0.15568 | 1.44247  | -7.05291  |
| C | -0.27088 | 0.96618  | -5.67760  |
| C | -0.89434 | -0.25991 | -5.67014  |
| C | -1.88068 | 0.99321  | -8.95946  |
| C | -1.55491 | 0.81939  | -10.37200 |
| C | -0.33323 | 0.19750  | -10.48525 |
| C | 0.20112  | -0.06651 | -9.15245  |
| H | 0.16882  | -0.06318 | -11.41479 |
| H | -2.19020 | 1.13767  | -11.19611 |
| H | 0.08593  | 1.50837  | -4.80424  |
| H | -1.11794 | -0.85918 | -4.78984  |
| H | -1.71461 | -1.56770 | -7.34163  |
| H | 0.29440  | 2.38319  | -7.36568  |
| H | -2.78487 | 1.45505  | -8.56640  |
| H | 1.15179  | -0.54888 | -8.93134  |

**BP86, closed-shell singlet**

6-31+G(d,p)

Electronic energy: -347.7021473

Hartree

|   |          |          |           |
|---|----------|----------|-----------|
| C | -1.22898 | -0.65932 | -7.08831  |
| C | -0.76333 | 0.43069  | -8.05125  |
| C | -0.15222 | 1.45820  | -7.10102  |
| C | -0.25906 | 1.01511  | -5.81983  |
| C | -0.92767 | -0.29976 | -5.81194  |
| C | -1.89102 | 0.99894  | -8.91009  |
| C | -1.58838 | 0.83711  | -10.22592 |
| C | -0.27825 | 0.17019  | -10.34732 |
| C | 0.21888  | -0.07511 | -9.10559  |
| H | 0.20695  | -0.08224 | -11.29411 |
| H | -2.20978 | 1.14799  | -11.07018 |
| H | 0.09140  | 1.54116  | -4.92764  |
| H | -1.14194 | -0.88430 | -4.91308  |
| H | -1.72435 | -1.57046 | -7.42891  |
| H | 0.29052  | 2.39195  | -7.45269  |
| H | -2.78383 | 1.45551  | -8.47880  |
| H | 1.16432  | -0.55429 | -8.84462  |

Aug-cc-pVTZ

Electronic energy: -347.799883 Hartree

|   |          |          |           |
|---|----------|----------|-----------|
| C | -1.22690 | -0.65494 | -7.08999  |
| C | -0.76333 | 0.43068  | -8.05125  |
| C | -0.15454 | 1.45394  | -7.10265  |
| C | -0.26081 | 1.01346  | -5.82961  |
| C | -0.92741 | -0.29746 | -5.82174  |
| C | -1.88659 | 0.99669  | -8.90884  |
| C | -1.58567 | 0.83579  | -10.21631 |
| C | -0.27947 | 0.17087  | -10.33735 |
| C | 0.21471  | -0.07297 | -9.10354  |
| H | 0.20447  | -0.08089 | -11.28017 |
| H | -2.20523 | 1.14576  | -11.05689 |
| H | 0.08856  | 1.53808  | -4.94123  |
| H | -1.14119 | -0.88033 | -4.92672  |
| H | -1.72051 | -1.56316 | -7.42760  |
| H | 0.28690  | 2.38456  | -7.45129  |
| H | -2.77661 | 1.45183  | -8.48083  |
| H | 1.15691  | -0.55052 | -8.84531  |

6-311++G(d,p)

Electronic energy: -347.7680425

Hartree

|   |          |          |           |
|---|----------|----------|-----------|
| C | -1.22835 | -0.65791 | -7.08923  |
| C | -0.76333 | 0.43068  | -8.05125  |
| C | -0.15299 | 1.45685  | -7.10193  |
| C | -0.25981 | 1.01463  | -5.82523  |
| C | -0.92775 | -0.29892 | -5.81735  |
| C | -1.88957 | 0.99821  | -8.90930  |
| C | -1.58731 | 0.83661  | -10.22058 |
| C | -0.27849 | 0.17035  | -10.34185 |
| C | 0.21757  | -0.07444 | -9.10455  |
| H | 0.20579  | -0.08160 | -11.28709 |
| H | -2.20757 | 1.14691  | -11.06347 |
| H | 0.09001  | 1.53969  | -4.93450  |
| H | -1.14160 | -0.88239 | -4.91995  |
| H | -1.72288 | -1.56761 | -7.42865  |
| H | 0.28909  | 2.38909  | -7.45240  |
| H | -2.78100 | 1.45407  | -8.47934  |
| H | 1.16146  | -0.55283 | -8.84464  |

**BP86, restricted open shell singlet**

6-31+G(d,p)

Electronic energy: -347.7021473

Hartree

|   |          |          |           |
|---|----------|----------|-----------|
| C | -1.22898 | -0.65932 | -7.08831  |
| C | -0.76333 | 0.43069  | -8.05125  |
| C | -0.15222 | 1.45820  | -7.10102  |
| C | -0.25906 | 1.01511  | -5.81983  |
| C | -0.92767 | -0.29976 | -5.81194  |
| C | -1.89102 | 0.99894  | -8.91009  |
| C | -1.58838 | 0.83711  | -10.22592 |
| C | -0.27825 | 0.17019  | -10.34732 |
| C | 0.21888  | -0.07511 | -9.10559  |
| H | 0.20695  | -0.08224 | -11.29411 |
| H | -2.20978 | 1.14799  | -11.07018 |
| H | 0.09140  | 1.54116  | -4.92764  |
| H | -1.14194 | -0.88430 | -4.91308  |
| H | -1.72435 | -1.57046 | -7.42891  |
| H | 0.29052  | 2.39195  | -7.45269  |
| H | -2.78383 | 1.45551  | -8.47880  |
| H | 1.16432  | -0.55429 | -8.84462  |

Aug-cc-pVTZ

Electronic energy: -347.799883 Hartree

|   |          |          |           |
|---|----------|----------|-----------|
| C | -1.22690 | -0.65494 | -7.08999  |
| C | -0.76333 | 0.43068  | -8.05125  |
| C | -0.15454 | 1.45394  | -7.10265  |
| C | -0.26081 | 1.01346  | -5.82961  |
| C | -0.92741 | -0.29746 | -5.82174  |
| C | -1.88659 | 0.99669  | -8.90884  |
| C | -1.58567 | 0.83579  | -10.21631 |
| C | -0.27947 | 0.17087  | -10.33735 |
| C | 0.21471  | -0.07297 | -9.10354  |
| H | 0.20447  | -0.08089 | -11.28017 |
| H | -2.20523 | 1.14576  | -11.05689 |
| H | 0.08856  | 1.53808  | -4.94123  |
| H | -1.14119 | -0.88033 | -4.92672  |
| H | -1.72051 | -1.56316 | -7.42760  |
| H | 0.28690  | 2.38456  | -7.45129  |
| H | -2.77661 | 1.45183  | -8.48083  |
| H | 1.15691  | -0.55051 | -8.84531  |

6-311++G(d,p)

Electronic energy: -347.7680425

Hartree

|   |          |          |           |
|---|----------|----------|-----------|
| C | -1.22835 | -0.65791 | -7.08923  |
| C | -0.76333 | 0.43068  | -8.05125  |
| C | -0.15299 | 1.45685  | -7.10193  |
| C | -0.25981 | 1.01463  | -5.82523  |
| C | -0.92775 | -0.29892 | -5.81735  |
| C | -1.88957 | 0.99821  | -8.90930  |
| C | -1.58731 | 0.83661  | -10.22058 |
| C | -0.27849 | 0.17035  | -10.34185 |
| C | 0.21757  | -0.07444 | -9.10455  |
| H | 0.20579  | -0.08160 | -11.28709 |
| H | -2.20757 | 1.14691  | -11.06347 |
| H | 0.09001  | 1.53969  | -4.93450  |
| H | -1.14160 | -0.88239 | -4.91995  |
| H | -1.72288 | -1.56761 | -7.42865  |
| H | 0.28909  | 2.38909  | -7.45240  |
| H | -2.78100 | 1.45407  | -8.47934  |
| H | 1.16146  | -0.55283 | -8.84464  |



**BP86, triplet**

6-31+G(d,p)

Electronic energy: -347.6224684

Hartree

|   |          |          |           |
|---|----------|----------|-----------|
| C | -1.22445 | -0.64811 | -7.10077  |
| C | -0.76530 | 0.43150  | -8.07666  |
| C | -0.15869 | 1.44779  | -7.11339  |
| C | -0.27449 | 0.97044  | -5.74124  |
| C | -0.90027 | -0.26021 | -5.73383  |
| C | -1.88920 | 0.99783  | -8.93708  |
| C | -1.58743 | 0.83645  | -10.26042 |
| C | -0.28436 | 0.17312  | -10.38114 |
| C | 0.21298  | -0.07229 | -9.13184  |
| H | 0.19711  | -0.07740 | -11.33076 |
| H | -2.20554 | 1.14567  | -11.10817 |
| H | 0.08429  | 1.51575  | -4.86539  |
| H | -1.12528 | -0.86297 | -4.85107  |
| H | -1.72130 | -1.56623 | -7.41881  |
| H | 0.28892  | 2.38706  | -7.44261  |
| H | -2.78267 | 1.45474  | -8.50649  |
| H | 1.15896  | -0.55175 | -8.87166  |

Aug-cc-pVTZ

Electronic energy: -347.7190844

Hartree

|   |          |          |           |
|---|----------|----------|-----------|
| C | -1.22271 | -0.64410 | -7.10394  |
| C | -0.76534 | 0.43151  | -8.07720  |
| C | -0.16091 | 1.44399  | -7.11651  |
| C | -0.27705 | 0.96711  | -5.75058  |
| C | -0.89914 | -0.25628 | -5.74321  |
| C | -1.88471 | 0.99555  | -8.93565  |
| C | -1.58457 | 0.83505  | -10.25080 |
| C | -0.28573 | 0.17388  | -10.37113 |
| C | 0.20876  | -0.07013 | -9.12960  |
| H | 0.19443  | -0.07595 | -11.31677 |
| H | -2.20078 | 1.14333  | -11.09487 |
| H | 0.07975  | 1.50893  | -4.87698  |
| H | -1.12250 | -0.85539 | -4.86275  |
| H | -1.71772 | -1.55909 | -7.41923  |
| H | 0.28527  | 2.37995  | -7.44295  |
| H | -2.77510 | 1.45088  | -8.50768  |
| H | 1.15132  | -0.54786 | -8.87144  |

6-311++G(d,p)

Electronic energy: -347.6875774

Hartree

|   |          |          |           |
|---|----------|----------|-----------|
| C | -1.22419 | -0.64719 | -7.10292  |
| C | -0.76531 | 0.43150  | -8.07681  |
| C | -0.15928 | 1.44702  | -7.11552  |
| C | -0.27579 | 0.96883  | -5.74638  |
| C | -0.89976 | -0.25827 | -5.73899  |
| C | -1.88773 | 0.99709  | -8.93604  |
| C | -1.58624 | 0.83588  | -10.25495 |
| C | -0.28471 | 0.17333  | -10.37553 |
| C | 0.21168  | -0.07162 | -9.13055  |
| H | 0.19588  | -0.07673 | -11.32356 |
| H | -2.20323 | 1.14454  | -11.10129 |
| H | 0.08184  | 1.51198  | -4.87109  |
| H | -1.12370 | -0.85882 | -4.85682  |
| H | -1.72019 | -1.56385 | -7.41990  |
| H | 0.28764  | 2.38475  | -7.44368  |
| H | -2.77963 | 1.45319  | -8.50633  |
| H | 1.15599  | -0.55024 | -8.87095  |

**BP86, quintuplet**

6-31+G(d,p)

Electronic energy: -347.5315875

Hartree

|   |          |          |           |
|---|----------|----------|-----------|
| C | -1.21672 | -0.64358 | -7.04360  |
| C | -0.76333 | 0.43055  | -8.05126  |
| C | -0.15754 | 1.43939  | -7.05629  |
| C | -0.27056 | 0.96720  | -5.67954  |
| C | -0.89497 | -0.26076 | -5.67205  |
| C | -1.87727 | 0.99147  | -8.95636  |
| C | -1.55568 | 0.81984  | -10.36999 |
| C | -0.33215 | 0.19700  | -10.48342 |
| C | 0.19820  | -0.06504 | -9.14878  |
| H | 0.17364  | -0.06556 | -11.41553 |
| H | -2.19503 | 1.14020  | -11.19594 |
| H | 0.08840  | 1.51324  | -4.80399  |
| H | -1.12041 | -0.86400 | -4.78951  |
| H | -1.71507 | -1.56727 | -7.34952  |
| H | 0.29373  | 2.38321  | -7.37362  |
| H | -2.78410 | 1.45461  | -8.55850  |
| H | 1.15215  | -0.54911 | -8.92342  |

Aug-cc-pVTZ

Electronic energy: -347.6269142

Hartree

|   |          |          |           |
|---|----------|----------|-----------|
| C | -1.18489 | -0.65946 | -7.03151  |
| C | -0.75390 | 0.40068  | -8.05294  |
| C | -0.13253 | 1.41572  | -7.08026  |
| C | -0.30214 | 0.99715  | -5.69851  |
| C | -0.92146 | -0.22413 | -5.66995  |
| C | -1.88270 | 0.95604  | -8.93605  |
| C | -1.54618 | 0.86151  | -10.34708 |
| C | -0.33199 | 0.24200  | -10.48068 |
| C | 0.18041  | -0.09658 | -9.16328  |
| H | 0.17763  | 0.02585  | -11.41760 |
| H | -2.17260 | 1.22546  | -11.15929 |
| H | 0.02165  | 1.57174  | -4.83274  |
| H | -1.17688 | -0.79254 | -4.77781  |
| H | -1.61469 | -1.61712 | -7.32143  |
| H | 0.37953  | 2.31622  | -7.41571  |
| H | -2.81297 | 1.34703  | -8.52694  |
| H | 1.09698  | -0.64819 | -8.95949  |

6-311++G(d,p)

Electronic energy: -347.5957408

Hartree

|   |          |          |           |
|---|----------|----------|-----------|
| C | -1.20567 | -0.65049 | -7.03959  |
| C | -0.76024 | 0.41866  | -8.05187  |
| C | -0.14830 | 1.43132  | -7.06693  |
| C | -0.28216 | 0.97820  | -5.68835  |
| C | -0.90416 | -0.24644 | -5.67230  |
| C | -1.88056 | 0.97743  | -8.94771  |
| C | -1.55094 | 0.83605  | -10.36018 |
| C | -0.33163 | 0.21508  | -10.48094 |
| C | 0.19216  | -0.07813 | -9.15305  |
| H | 0.17544  | -0.02839 | -11.41526 |
| H | -2.18405 | 1.17330  | -11.18170 |
| H | 0.06383  | 1.53424  | -4.81624  |
| H | -1.13977 | -0.83560 | -4.78533  |
| H | -1.67972 | -1.58661 | -7.33944  |
| H | 0.32444  | 2.35956  | -7.39210  |
| H | -2.79704 | 1.41202  | -8.54517  |
| H | 1.13166  | -0.58881 | -8.93513  |

***CAM-B3LYP, closed-shell singlet***

6-31+G(d,p)

Electronic energy: -347.5043701

Hartree

|   |          |          |           |
|---|----------|----------|-----------|
| C | -1.22431 | -0.64950 | -7.09198  |
| C | -0.76333 | 0.43067  | -8.05125  |
| C | -0.15743 | 1.44861  | -7.10459  |
| C | -0.26126 | 1.01445  | -5.83988  |
| C | -0.92852 | -0.29778 | -5.83200  |
| C | -1.88107 | 0.99389  | -8.90737  |
| C | -1.58553 | 0.83579  | -10.20599 |
| C | -0.27804 | 0.17021  | -10.32714 |
| C | 0.20948  | -0.07031 | -9.10108  |
| H | 0.20292  | -0.08000 | -11.26554 |
| H | -2.20147 | 1.14396  | -11.04275 |
| H | 0.08612  | 1.53589  | -4.95561  |
| H | -1.14092 | -0.87719 | -4.94111  |
| H | -1.71596 | -1.55456 | -7.42572  |
| H | 0.28263  | 2.37583  | -7.44934  |
| H | -2.76812 | 1.44750  | -8.48354  |
| H | 1.14812  | -0.54607 | -8.84642  |

Aug-cc-pVTZ

Electronic energy: -347.584476 Hartree

|   |          |          |           |
|---|----------|----------|-----------|
| C | -1.22236 | -0.64537 | -7.09365  |
| C | -0.76333 | 0.43067  | -8.05125  |
| C | -0.15963 | 1.44459  | -7.10621  |
| C | -0.26288 | 1.01302  | -5.84958  |
| C | -0.92837 | -0.29572 | -5.84171  |
| C | -1.87688 | 0.99177  | -8.90610  |
| C | -1.58306 | 0.83459  | -10.19645 |
| C | -0.27903 | 0.17078  | -10.31728 |
| C | 0.20554  | -0.06829 | -9.09905  |
| H | 0.20070  | -0.07878 | -11.25148 |
| H | -2.19716 | 1.14184  | -11.02929 |
| H | 0.08341  | 1.53306  | -4.96935  |
| H | -1.14030 | -0.87346 | -4.95489  |
| H | -1.71213 | -1.54724 | -7.42454  |
| H | 0.27898  | 2.36843  | -7.44807  |
| H | -2.76088 | 1.44380  | -8.48544  |
| H | 1.14069  | -0.54229 | -8.84696  |

6-311++G(d,p)

Electronic energy: -347.5695501

Hartree

|   |          |          |           |
|---|----------|----------|-----------|
| C | -1.22376 | -0.64831 | -7.09251  |
| C | -0.76334 | 0.43067  | -8.05125  |
| C | -0.15807 | 1.44746  | -7.10511  |
| C | -0.26183 | 1.01424  | -5.84495  |
| C | -0.92871 | -0.29724 | -5.83707  |
| C | -1.87987 | 0.99328  | -8.90695  |
| C | -1.58478 | 0.83544  | -10.20095 |
| C | -0.27802 | 0.17023  | -10.32203 |
| C | 0.20835  | -0.06974 | -9.10044  |
| H | 0.20209  | -0.07953 | -11.25878 |
| H | -2.19963 | 1.14306  | -11.03624 |
| H | 0.08493  | 1.53476  | -4.96224  |
| H | -1.14074 | -0.87563 | -4.94776  |
| H | -1.71454 | -1.55186 | -7.42523  |
| H | 0.28128  | 2.37309  | -7.44881  |
| H | -2.76545 | 1.44613  | -8.48430  |
| H | 1.14537  | -0.54467 | -8.84667  |

***CAM-B3LYP, restricted open shell singlet***

6-31+G(d,p)

Electronic energy: -347.5043701

Hartree

|   |          |          |           |
|---|----------|----------|-----------|
| C | -1.22431 | -0.64950 | -7.09198  |
| C | -0.76333 | 0.43067  | -8.05125  |
| C | -0.15743 | 1.44861  | -7.10459  |
| C | -0.26126 | 1.01445  | -5.83988  |
| C | -0.92852 | -0.29778 | -5.83200  |
| C | -1.88107 | 0.99389  | -8.90737  |
| C | -1.58553 | 0.83579  | -10.20599 |
| C | -0.27804 | 0.17021  | -10.32714 |
| C | 0.20948  | -0.07031 | -9.10108  |
| H | 0.20292  | -0.08000 | -11.26554 |
| H | -2.20147 | 1.14396  | -11.04275 |
| H | 0.08612  | 1.53589  | -4.95561  |
| H | -1.14092 | -0.87719 | -4.94111  |
| H | -1.71596 | -1.55456 | -7.42572  |
| H | 0.28263  | 2.37583  | -7.44934  |
| H | -2.76812 | 1.44750  | -8.48354  |
| H | 1.14812  | -0.54607 | -8.84642  |

Aug-cc-pVTZ

Electronic energy: -347.584476 Hartree

|   |          |          |           |
|---|----------|----------|-----------|
| C | -1.22236 | -0.64537 | -7.09365  |
| C | -0.76333 | 0.43067  | -8.05125  |
| C | -0.15963 | 1.44459  | -7.10621  |
| C | -0.26288 | 1.01302  | -5.84958  |
| C | -0.92837 | -0.29572 | -5.84171  |
| C | -1.87688 | 0.99177  | -8.90610  |
| C | -1.58306 | 0.83459  | -10.19645 |
| C | -0.27903 | 0.17078  | -10.31728 |
| C | 0.20554  | -0.06829 | -9.09905  |
| H | 0.20070  | -0.07878 | -11.25148 |
| H | -2.19716 | 1.14184  | -11.02929 |
| H | 0.08341  | 1.53306  | -4.96935  |
| H | -1.14030 | -0.87346 | -4.95489  |
| H | -1.71213 | -1.54724 | -7.42454  |
| H | 0.27898  | 2.36843  | -7.44807  |
| H | -2.76088 | 1.44380  | -8.48544  |
| H | 1.14069  | -0.54229 | -8.84696  |

6-311++G(d,p)

Electronic energy: -347.5695501

Hartree

|   |          |          |           |
|---|----------|----------|-----------|
| C | -1.22376 | -0.64831 | -7.09251  |
| C | -0.76334 | 0.43067  | -8.05125  |
| C | -0.15807 | 1.44746  | -7.10511  |
| C | -0.26183 | 1.01424  | -5.84495  |
| C | -0.92871 | -0.29724 | -5.83707  |
| C | -1.87987 | 0.99328  | -8.90695  |
| C | -1.58478 | 0.83544  | -10.20095 |
| C | -0.27802 | 0.17023  | -10.32203 |
| C | 0.20835  | -0.06974 | -9.10044  |
| H | 0.20209  | -0.07953 | -11.25878 |
| H | -2.19963 | 1.14306  | -11.03624 |
| H | 0.08493  | 1.53476  | -4.96224  |
| H | -1.14074 | -0.87563 | -4.94776  |
| H | -1.71454 | -1.55186 | -7.42523  |
| H | 0.28128  | 2.37309  | -7.44881  |
| H | -2.76545 | 1.44613  | -8.48430  |
| H | 1.14537  | -0.54467 | -8.84667  |

**CAM-B3LYP, triplet**

6-31+G(d,p)

Electronic energy: -347.4217817

Hartree

|   |          |          |           |
|---|----------|----------|-----------|
| C | -1.22018 | -0.63838 | -7.10829  |
| C | -0.76553 | 0.43161  | -8.07994  |
| C | -0.16407 | 1.43855  | -7.12078  |
| C | -0.28095 | 0.95976  | -5.75216  |
| C | -0.89550 | -0.24881 | -5.74489  |
| C | -1.88224 | 0.99428  | -8.94019  |
| C | -1.58636 | 0.83601  | -10.24176 |
| C | -0.28261 | 0.17233  | -10.36256 |
| C | 0.20565  | -0.06857 | -9.13364  |
| H | 0.19532  | -0.07634 | -11.30317 |
| H | -2.19963 | 1.14281  | -11.08128 |
| H | 0.07452  | 1.49988  | -4.88341  |
| H | -1.11830 | -0.84591 | -4.86929  |
| H | -1.71342 | -1.55142 | -7.41524  |
| H | 0.28162  | 2.37201  | -7.43885  |
| H | -2.76959 | 1.44804  | -8.51660  |
| H | 1.14456  | -0.54447 | -8.87925  |

Aug-cc-pVTZ

Electronic energy: -347.5008189

Hartree

|   |          |          |           |
|---|----------|----------|-----------|
| C | -1.21843 | -0.63440 | -7.11125  |
| C | -0.76556 | 0.43162  | -8.08024  |
| C | -0.16627 | 1.43477  | -7.12370  |
| C | -0.28342 | 0.95656  | -5.76121  |
| C | -0.89441 | -0.24502 | -5.75398  |
| C | -1.87799 | 0.99212  | -8.93901  |
| C | -1.58378 | 0.83476  | -10.23237 |
| C | -0.28373 | 0.17296  | -10.35282 |
| C | 0.20164  | -0.06652 | -9.13169  |
| H | 0.19294  | -0.07504 | -11.28925 |
| H | -2.19518 | 1.14063  | -11.06799 |
| H | 0.06988  | 1.49280  | -4.89466  |
| H | -1.11537 | -0.83809 | -4.88064  |
| H | -1.70968 | -1.54399 | -7.41562  |
| H | 0.27782  | 2.36461  | -7.43914  |
| H | -2.76214 | 1.44423  | -8.51825  |
| H | 1.13695  | -0.54060 | -8.87950  |

6-311++G(d,p)

Electronic energy: -347.4860394

Hartree

|   |          |          |           |
|---|----------|----------|-----------|
| C | -1.21992 | -0.63754 | -7.11005  |
| C | -0.76554 | 0.43161  | -8.08002  |
| C | -0.16460 | 1.43783  | -7.12254  |
| C | -0.28221 | 0.95809  | -5.75660  |
| C | -0.89492 | -0.24685 | -5.74935  |
| C | -1.88102 | 0.99366  | -8.93976  |
| C | -1.58554 | 0.83562  | -10.23673 |
| C | -0.28265 | 0.17239  | -10.35744 |
| C | 0.20452  | -0.06799 | -9.13299  |
| H | 0.19444  | -0.07585 | -11.29638 |
| H | -2.19773 | 1.14189  | -11.07475 |
| H | 0.07206  | 1.49595  | -4.88840  |
| H | -1.11660 | -0.84165 | -4.87433  |
| H | -1.71228 | -1.54902 | -7.41607  |
| H | 0.28034  | 2.36966  | -7.43965  |
| H | -2.76679 | 1.44661  | -8.51707  |
| H | 1.14172  | -0.54303 | -8.87919  |

### ***CAM-B3LYP, quintuplet***

6-31+G(d,p)

Electronic energy: -347.3335111

Hartree

|   |          |          |           |
|---|----------|----------|-----------|
| C | -1.21404 | -0.63618 | -7.05440  |
| C | -0.76334 | 0.43065  | -8.05125  |
| C | -0.16197 | 1.43280  | -7.06687  |
| C | -0.27698 | 0.95774  | -5.69799  |
| C | -0.89126 | -0.25029 | -5.69071  |
| C | -1.86944 | 0.98770  | -8.94636  |
| C | -1.54438 | 0.81403  | -10.35238 |
| C | -0.34070 | 0.20129  | -10.46392 |
| C | 0.19209  | -0.06172 | -9.13739  |
| H | 0.15976  | -0.05870 | -11.38861 |
| H | -2.17745 | 1.13105  | -11.17203 |
| H | 0.07857  | 1.49809  | -4.82925  |
| H | -1.11419 | -0.84757 | -4.81511  |
| H | -1.70836 | -1.55281 | -7.35355  |
| H | 0.28602  | 2.36931  | -7.37719  |
| H | -2.76952 | 1.44767  | -8.55607  |
| H | 1.13848  | -0.54169 | -8.91821  |

Aug-cc-pVTZ

Electronic energy: -347.4113027

Hartree

|   |          |          |           |
|---|----------|----------|-----------|
| C | -1.21230 | -0.63224 | -7.05710  |
| C | -0.76335 | 0.43064  | -8.05125  |
| C | -0.16414 | 1.42905  | -7.06954  |
| C | -0.27944 | 0.95454  | -5.70699  |
| C | -0.89016 | -0.24650 | -5.69974  |
| C | -1.86541 | 0.98565  | -8.94403  |
| C | -1.54020 | 0.81197  | -10.34370 |
| C | -0.34349 | 0.20279  | -10.45459 |
| C | 0.18846  | -0.05987 | -9.13434  |
| H | 0.15325  | -0.05529 | -11.37664 |
| H | -2.16918 | 1.12695  | -11.16144 |
| H | 0.07396  | 1.49105  | -4.84050  |
| H | -1.11125 | -0.83979 | -4.82644  |
| H | -1.70462 | -1.54541 | -7.35353  |
| H | 0.28225  | 2.36193  | -7.37712  |
| H | -2.76219 | 1.44389  | -8.55681  |
| H | 1.13109  | -0.53797 | -8.91756  |

6-311++G(d,p)

Electronic energy: -347.3967511

Hartree

|   |          |          |           |
|---|----------|----------|-----------|
| C | -1.21384 | -0.63544 | -7.05621  |
| C | -0.76335 | 0.43064  | -8.05125  |
| C | -0.16246 | 1.43219  | -7.06868  |
| C | -0.27825 | 0.95608  | -5.70261  |
| C | -0.89068 | -0.24833 | -5.69534  |
| C | -1.86864 | 0.98729  | -8.94461  |
| C | -1.54222 | 0.81297  | -10.34793 |
| C | -0.34215 | 0.20207  | -10.45913 |
| C | 0.19155  | -0.06145 | -9.13551  |
| H | 0.15610  | -0.05678 | -11.38303 |
| H | -2.17296 | 1.12883  | -11.16721 |
| H | 0.07611  | 1.49417  | -4.83444  |
| H | -1.11249 | -0.84330 | -4.82034  |
| H | -1.70726 | -1.55046 | -7.35447  |
| H | 0.28476  | 2.36703  | -7.37811  |
| H | -2.76716 | 1.44644  | -8.55537  |
| H | 1.13622  | -0.54057 | -8.91707  |

**CAM-B3LYP[GD3BJ], closed-shell singlet**

6-31+G(d,p)

Electronic energy: -347.6195223

Hartree

|   |          |          |           |
|---|----------|----------|-----------|
| C | -1.22456 | -0.64977 | -7.09320  |
| C | -0.76333 | 0.43067  | -8.05125  |
| C | -0.15737 | 1.44896  | -7.10581  |
| C | -0.26130 | 1.01462  | -5.84124  |
| C | -0.92869 | -0.29786 | -5.83336  |
| C | -1.88129 | 0.99401  | -8.90611  |
| C | -1.58556 | 0.83581  | -10.20462 |
| C | -0.27781 | 0.17010  | -10.32580 |
| C | 0.20988  | -0.07051 | -9.09988  |
| H | 0.20281  | -0.07994 | -11.26426 |
| H | -2.20117 | 1.14381  | -11.04151 |
| H | 0.08592  | 1.53573  | -4.95687  |
| H | -1.14091 | -0.87695 | -4.94237  |
| H | -1.71602 | -1.55421 | -7.42835  |
| H | 0.28229  | 2.37565  | -7.45196  |
| H | -2.76765 | 1.44727  | -8.48094  |
| H | 1.14805  | -0.54602 | -8.84377  |

Aug-cc-pVTZ

Electronic energy: -347.6045906

Hartree

|   |          |          |           |
|---|----------|----------|-----------|
| C | -1.22264 | -0.64570 | -7.09482  |
| C | -0.76333 | 0.43067  | -8.05125  |
| C | -0.15953 | 1.44499  | -7.10738  |
| C | -0.26290 | 1.01322  | -5.85087  |
| C | -0.92855 | -0.29584 | -5.84300  |
| C | -1.87716 | 0.99192  | -8.90489  |
| C | -1.58312 | 0.83463  | -10.19514 |
| C | -0.27878 | 0.17066  | -10.31600 |
| C | 0.20600  | -0.06852 | -9.09792  |
| H | 0.20059  | -0.07873 | -11.25029 |
| H | -2.19688 | 1.14171  | -11.02814 |
| H | 0.08322  | 1.53291  | -4.97052  |
| H | -1.14029 | -0.87323 | -4.95606  |
| H | -1.71222 | -1.54695 | -7.42713  |
| H | 0.27867  | 2.36830  | -7.45065  |
| H | -2.76047 | 1.44361  | -8.48288  |
| H | 1.14068  | -0.54227 | -8.84436  |

6-311++G(d,p)

Electronic energy: -347.5192864

Hartree

|   |          |          |           |
|---|----------|----------|-----------|
| C | -1.22402 | -0.64860 | -7.09371  |
| C | -0.76333 | 0.43067  | -8.05125  |
| C | -0.15799 | 1.44782  | -7.10631  |
| C | -0.26187 | 1.01442  | -5.84628  |
| C | -0.92889 | -0.29734 | -5.83840  |
| C | -1.88010 | 0.99341  | -8.90572  |
| C | -1.58481 | 0.83547  | -10.19961 |
| C | -0.27778 | 0.17012  | -10.32072 |
| C | 0.20877  | -0.06994 | -9.09927  |
| H | 0.20199  | -0.07948 | -11.25754 |
| H | -2.19934 | 1.14292  | -11.03503 |
| H | 0.08474  | 1.53461  | -4.96346  |
| H | -1.14074 | -0.87540 | -4.94898  |
| H | -1.71461 | -1.55151 | -7.42785  |
| H | 0.28095  | 2.37292  | -7.45143  |
| H | -2.76499 | 1.44592  | -8.48171  |
| H | 1.14531  | -0.54463 | -8.84403  |

***CAM-B3LYP[GD3BJ], restricted open shell singlet***

6-31+G(d,p)

Electronic energy: -347.6195223

Hartree

|   |          |          |           |
|---|----------|----------|-----------|
| C | -1.22456 | -0.64977 | -7.09320  |
| C | -0.76333 | 0.43067  | -8.05125  |
| C | -0.15737 | 1.44896  | -7.10581  |
| C | -0.26130 | 1.01462  | -5.84124  |
| C | -0.92869 | -0.29786 | -5.83336  |
| C | -1.88129 | 0.99401  | -8.90611  |
| C | -1.58556 | 0.83581  | -10.20462 |
| C | -0.27781 | 0.17010  | -10.32580 |
| C | 0.20988  | -0.07051 | -9.09988  |
| H | 0.20281  | -0.07994 | -11.26426 |
| H | -2.20117 | 1.14381  | -11.04151 |
| H | 0.08592  | 1.53573  | -4.95687  |
| H | -1.14091 | -0.87695 | -4.94237  |
| H | -1.71602 | -1.55421 | -7.42835  |
| H | 0.28229  | 2.37565  | -7.45196  |
| H | -2.76765 | 1.44727  | -8.48094  |
| H | 1.14805  | -0.54602 | -8.84377  |

Aug-cc-pVTZ

Electronic energy: -347.6045906

Hartree

|   |          |          |           |
|---|----------|----------|-----------|
| C | -1.22264 | -0.64570 | -7.09482  |
| C | -0.76333 | 0.43067  | -8.05125  |
| C | -0.15953 | 1.44499  | -7.10738  |
| C | -0.26290 | 1.01322  | -5.85087  |
| C | -0.92855 | -0.29584 | -5.84300  |
| C | -1.87716 | 0.99192  | -8.90489  |
| C | -1.58312 | 0.83463  | -10.19514 |
| C | -0.27878 | 0.17066  | -10.31600 |
| C | 0.20600  | -0.06852 | -9.09792  |
| H | 0.20059  | -0.07873 | -11.25029 |
| H | -2.19688 | 1.14171  | -11.02814 |
| H | 0.08322  | 1.53291  | -4.97052  |
| H | -1.14029 | -0.87323 | -4.95606  |
| H | -1.71222 | -1.54695 | -7.42713  |
| H | 0.27867  | 2.36830  | -7.45065  |
| H | -2.76047 | 1.44361  | -8.48288  |
| H | 1.14068  | -0.54227 | -8.84436  |

6-311++G(d,p)

Electronic energy: -347.5192864

Hartree

|   |          |          |           |
|---|----------|----------|-----------|
| C | -1.22402 | -0.64860 | -7.09371  |
| C | -0.76333 | 0.43067  | -8.05125  |
| C | -0.15799 | 1.44782  | -7.10631  |
| C | -0.26187 | 1.01442  | -5.84628  |
| C | -0.92889 | -0.29734 | -5.83840  |
| C | -1.88010 | 0.99341  | -8.90572  |
| C | -1.58481 | 0.83547  | -10.19961 |
| C | -0.27778 | 0.17012  | -10.32072 |
| C | 0.20877  | -0.06994 | -9.09927  |
| H | 0.20199  | -0.07948 | -11.25754 |
| H | -2.19934 | 1.14292  | -11.03503 |
| H | 0.08474  | 1.53461  | -4.96346  |
| H | -1.14074 | -0.87540 | -4.94898  |
| H | -1.71461 | -1.55151 | -7.42785  |
| H | 0.28095  | 2.37292  | -7.45143  |
| H | -2.76499 | 1.44592  | -8.48171  |
| H | 1.14531  | -0.54463 | -8.84403  |



***CAM-B3LYP[GD3BJ], triplet***

6-31+G(d,p)

Electronic energy: -347.5352505

Hartree

|   |          |          |           |
|---|----------|----------|-----------|
| C | -1.22053 | -0.63883 | -7.10958  |
| C | -0.76553 | 0.43160  | -8.07986  |
| C | -0.16392 | 1.43908  | -7.12208  |
| C | -0.28104 | 0.95988  | -5.75379  |
| C | -0.89566 | -0.24883 | -5.74652  |
| C | -1.88240 | 0.99437  | -8.93879  |
| C | -1.58635 | 0.83601  | -10.24028 |
| C | -0.28240 | 0.17223  | -10.36110 |
| C | 0.20603  | -0.06875 | -9.13229  |
| H | 0.19520  | -0.07627 | -11.30178 |
| H | -2.19930 | 1.14265  | -11.07993 |
| H | 0.07424  | 1.49959  | -4.88486  |
| H | -1.11824 | -0.84552 | -4.87075  |
| H | -1.71359 | -1.55126 | -7.41793  |
| H | 0.28138  | 2.37203  | -7.44154  |
| H | -2.76906 | 1.44778  | -8.51383  |
| H | 1.14445  | -0.54440 | -8.87642  |

Aug-cc-pVTZ

Electronic energy: -347.5204649

Hartree

|   |          |          |           |
|---|----------|----------|-----------|
| C | -1.21881 | -0.63492 | -7.11250  |
| C | -0.76555 | 0.43161  | -8.08015  |
| C | -0.16608 | 1.43537  | -7.12495  |
| C | -0.28349 | 0.95669  | -5.76278  |
| C | -0.89457 | -0.24505 | -5.75555  |
| C | -1.87822 | 0.99225  | -8.93765  |
| C | -1.58381 | 0.83478  | -10.23095 |
| C | -0.28349 | 0.17285  | -10.35142 |
| C | 0.20207  | -0.06673 | -9.13039  |
| H | 0.19283  | -0.07498 | -11.28793 |
| H | -2.19487 | 1.14048  | -11.06671 |
| H | 0.06960  | 1.49250  | -4.89604  |
| H | -1.11530 | -0.83770 | -4.88202  |
| H | -1.70988 | -1.54390 | -7.41827  |
| H | 0.27761  | 2.36469  | -7.44179  |
| H | -2.76167 | 1.44401  | -8.51551  |
| H | 1.13691  | -0.54056 | -8.87671  |

6-311++G(d,p)

Electronic energy: -347.4365504

Hartree

|   |          |          |           |
|---|----------|----------|-----------|
| C | -1.22028 | -0.63800 | -7.11132  |
| C | -0.76554 | 0.43161  | -8.07993  |
| C | -0.16444 | 1.43838  | -7.12382  |
| C | -0.28229 | 0.95821  | -5.75819  |
| C | -0.89507 | -0.24687 | -5.75094  |
| C | -1.88121 | 0.99376  | -8.93838  |
| C | -1.58554 | 0.83563  | -10.23528 |
| C | -0.28243 | 0.17228  | -10.35601 |
| C | 0.20491  | -0.06818 | -9.13166  |
| H | 0.19433  | -0.07578 | -11.29502 |
| H | -2.19742 | 1.14174  | -11.07343 |
| H | 0.07179  | 1.49566  | -4.88982  |
| H | -1.11653 | -0.84127 | -4.87576  |
| H | -1.71245 | -1.54887 | -7.41875  |
| H | 0.28011  | 2.36969  | -7.44233  |
| H | -2.76627 | 1.44636  | -8.51430  |
| H | 1.14163  | -0.54296 | -8.87637  |

***CAM-B3LYP[GD3BJ], quintuplet***

6-31+G(d,p)

Electronic energy: -347.4450227

Hartree

|   |          |          |           |
|---|----------|----------|-----------|
| C | -1.21436 | -0.63656 | -7.05575  |
| C | -0.76334 | 0.43065  | -8.05125  |
| C | -0.16186 | 1.43327  | -7.06823  |
| C | -0.27708 | 0.95786  | -5.69965  |
| C | -0.89142 | -0.25030 | -5.69236  |
| C | -1.86976 | 0.98787  | -8.94496  |
| C | -1.54432 | 0.81401  | -10.35073 |
| C | -0.34051 | 0.20121  | -10.46228 |
| C | 0.19262  | -0.06198 | -9.13608  |
| H | 0.15956  | -0.05858 | -11.38708 |
| H | -2.17701 | 1.13085  | -11.17056 |
| H | 0.07829  | 1.49782  | -4.83076  |
| H | -1.11414 | -0.84720 | -4.81662  |
| H | -1.70851 | -1.55260 | -7.35626  |
| H | 0.28576  | 2.36928  | -7.37991  |
| H | -2.76920 | 1.44752  | -8.55336  |
| H | 1.13856  | -0.54172 | -8.91548  |

Aug-cc-pVTZ

Electronic energy: -347.4304649

Hartree

|   |          |          |           |
|---|----------|----------|-----------|
| C | -1.21265 | -0.63270 | -7.05843  |
| C | -0.76335 | 0.43064  | -8.05125  |
| C | -0.16399 | 1.42959  | -7.07088  |
| C | -0.27952 | 0.95467  | -5.70860  |
| C | -0.89031 | -0.24652 | -5.70135  |
| C | -1.86581 | 0.98586  | -8.94265  |
| C | -1.54015 | 0.81196  | -10.34208 |
| C | -0.34329 | 0.20270  | -10.45298 |
| C | 0.18905  | -0.06017 | -9.13306  |
| H | 0.15305  | -0.05516 | -11.37516 |
| H | -2.16874 | 1.12675  | -11.16002 |
| H | 0.07369  | 1.49077  | -4.84195  |
| H | -1.11119 | -0.83941 | -4.82789  |
| H | -1.70481 | -1.54527 | -7.35624  |
| H | 0.28201  | 2.36197  | -7.37983  |
| H | -2.76193 | 1.44377  | -8.55410  |
| H | 1.13124  | -0.53804 | -8.91484  |

6-311++G(d,p)

Electronic energy: -347.3480497

Hartree

|   |          |          |           |
|---|----------|----------|-----------|
| C | -1.21417 | -0.63584 | -7.05754  |
| C | -0.76335 | 0.43064  | -8.05125  |
| C | -0.16234 | 1.43267  | -7.07003  |
| C | -0.27834 | 0.95620  | -5.70424  |
| C | -0.89084 | -0.24834 | -5.69697  |
| C | -1.86898 | 0.98747  | -8.94323  |
| C | -1.54216 | 0.81295  | -10.34629 |
| C | -0.34196 | 0.20199  | -10.45751 |
| C | 0.19209  | -0.06172 | -9.13421  |
| H | 0.15590  | -0.05666 | -11.38151 |
| H | -2.17253 | 1.12863  | -11.16575 |
| H | 0.07583  | 1.49391  | -4.83593  |
| H | -1.11244 | -0.84294 | -4.82182  |
| H | -1.70742 | -1.55027 | -7.35719  |
| H | 0.28450  | 2.36701  | -7.38084  |
| H | -2.76685 | 1.44629  | -8.55265  |
| H | 1.13632  | -0.54061 | -8.91433  |

### *HF, closed-shell singlet*

6-31+G(d,p)

Electronic energy: -345.4142858

Hartree

|   |          |          |           |
|---|----------|----------|-----------|
| C | -1.22331 | -0.64861 | -7.08603  |
| C | -0.76334 | 0.43067  | -8.05125  |
| C | -0.15754 | 1.44733  | -7.09863  |
| C | -0.26001 | 1.01787  | -5.84515  |
| C | -0.93057 | -0.30086 | -5.83722  |
| C | -1.88045 | 0.99353  | -8.91342  |
| C | -1.58837 | 0.83727  | -10.20045 |
| C | -0.27440 | 0.16839  | -10.32220 |
| C | 0.20794  | -0.06957 | -9.10693  |
| H | 0.20048  | -0.07868 | -11.25352 |
| H | -2.19724 | 1.14189  | -11.03135 |
| H | 0.08353  | 1.53293  | -4.96731  |
| H | -1.14011 | -0.87346 | -4.95284  |
| H | -1.71115 | -1.54766 | -7.41176  |
| H | 0.27994  | 2.36801  | -7.43530  |
| H | -2.76185 | 1.44422  | -8.49822  |
| H | 1.13972  | -0.54188 | -8.85974  |

Aug-cc-pVTZ

Electronic energy: -345.5058384

Hartree

|   |          |          |           |
|---|----------|----------|-----------|
| C | -1.22191 | -0.64577 | -7.08659  |
| C | -0.76334 | 0.43067  | -8.05125  |
| C | -0.15901 | 1.44452  | -7.09915  |
| C | -0.26083 | 1.01738  | -5.85140  |
| C | -0.93069 | -0.29996 | -5.84348  |
| C | -1.87759 | 0.99208  | -8.91314  |
| C | -1.58721 | 0.83672  | -10.19426 |
| C | -0.27461 | 0.16854  | -10.31588 |
| C | 0.20517  | -0.06815 | -9.10613  |
| H | 0.19986  | -0.07831 | -11.24469 |
| H | -2.19530 | 1.14095  | -11.02276 |
| H | 0.08221  | 1.53192  | -4.97600  |
| H | -1.14011 | -0.87189 | -4.96155  |
| H | -1.70872 | -1.54312 | -7.41041  |
| H | 0.27771  | 2.36338  | -7.43390  |
| H | -2.75738 | 1.44194  | -8.50002  |
| H | 1.13504  | -0.53951 | -8.86069  |

6-311++G(d,p)

Electronic energy: -345.4689102

Hartree

|   |          |          |           |
|---|----------|----------|-----------|
| C | -1.22311 | -0.64821 | -7.08611  |
| C | -0.76334 | 0.43067  | -8.05125  |
| C | -0.15775 | 1.44693  | -7.09871  |
| C | -0.25999 | 1.01832  | -5.84753  |
| C | -0.93094 | -0.30116 | -5.83960  |
| C | -1.88004 | 0.99332  | -8.91338  |
| C | -1.58857 | 0.83739  | -10.19803 |
| C | -0.27384 | 0.16812  | -10.31985 |
| C | 0.20755  | -0.06937 | -9.10681  |
| H | 0.20116  | -0.07901 | -11.25104 |
| H | -2.19754 | 1.14205  | -11.02878 |
| H | 0.08359  | 1.53350  | -4.96983  |
| H | -1.14055 | -0.87387 | -4.95536  |
| H | -1.71095 | -1.54730 | -7.41152  |
| H | 0.27977  | 2.36763  | -7.43505  |
| H | -2.76150 | 1.44404  | -8.49850  |
| H | 1.13933  | -0.54169 | -8.85995  |

**HF, restricted open shell singlet**

6-31+G(d,p)

Electronic energy: -345.4208425

Hartree

|   |          |          |           |
|---|----------|----------|-----------|
| C | -1.22995 | -0.64569 | -7.08286  |
| C | -0.76334 | 0.43067  | -8.05125  |
| C | -0.15051 | 1.44424  | -7.09670  |
| C | -0.25496 | 1.00192  | -5.81715  |
| C | -0.93125 | -0.28679 | -5.80781  |
| C | -1.88440 | 0.98714  | -8.91590  |
| C | -1.58408 | 0.82439  | -10.23010 |
| C | -0.28305 | 0.18316  | -10.34996 |
| C | 0.21151  | -0.06301 | -9.10955  |
| H | 0.20051  | -0.05399 | -11.27927 |
| H | -2.20129 | 1.11892  | -11.05835 |
| H | 0.10113  | 1.51402  | -4.94271  |
| H | -1.15370 | -0.85627 | -4.92469  |
| H | -1.72999 | -1.54043 | -7.40190  |
| H | 0.30001  | 2.36025  | -7.42888  |
| H | -2.77380 | 1.42691  | -8.50607  |
| H | 1.15043  | -0.52404 | -8.86816  |

Aug-cc-pVTZ

Electronic energy: -345.5104399

Hartree

|   |          |          |           |
|---|----------|----------|-----------|
| C | -1.22776 | -0.64318 | -7.08404  |
| C | -0.76334 | 0.43067  | -8.05125  |
| C | -0.15286 | 1.44180  | -7.09769  |
| C | -0.25669 | 1.00303  | -5.82731  |
| C | -0.93108 | -0.28723 | -5.81816  |
| C | -1.88103 | 0.98645  | -8.91508  |
| C | -1.58299 | 0.82524  | -10.21982 |
| C | -0.28258 | 0.18163  | -10.33972 |
| C | 0.20831  | -0.06239 | -9.10820  |
| H | 0.19905  | -0.05623 | -11.26703 |
| H | -2.19798 | 1.12037  | -11.04635 |
| H | 0.09720  | 1.51449  | -4.95459  |
| H | -1.15161 | -0.85595 | -4.93704  |
| H | -1.72505 | -1.53675 | -7.40212  |
| H | 0.29508  | 2.35656  | -7.42859  |
| H | -2.76766 | 1.42685  | -8.50657  |
| H | 1.14429  | -0.52398 | -8.86773  |

6-311++G(d,p)

Electronic energy: -345.4746208

Hartree

|   |          |          |           |
|---|----------|----------|-----------|
| C | -1.22934 | -0.64548 | -7.08327  |
| C | -0.76334 | 0.43067  | -8.05125  |
| C | -0.15117 | 1.44406  | -7.09702  |
| C | -0.25542 | 1.00292  | -5.82092  |
| C | -0.93137 | -0.28753 | -5.81166  |
| C | -1.88375 | 0.98735  | -8.91557  |
| C | -1.58416 | 0.82507  | -10.22623 |
| C | -0.28239 | 0.18223  | -10.34621 |
| C | 0.21092  | -0.06324 | -9.10915  |
| H | 0.20062  | -0.05541 | -11.27561 |
| H | -2.20084 | 1.12010  | -11.05462 |
| H | 0.09995  | 1.51509  | -4.94630  |
| H | -1.15308 | -0.85710 | -4.92848  |
| H | -1.72863 | -1.54055 | -7.40231  |
| H | 0.29861  | 2.36038  | -7.42908  |
| H | -2.77274 | 1.42781  | -8.50581  |
| H | 1.14942  | -0.52497 | -8.86781  |

### *HF, triplet*

6-31+G(d,p)

Electronic energy: -345.3847523

Hartree

|   |          |          |           |
|---|----------|----------|-----------|
| C | -1.30897 | -0.35735 | -7.52020  |
| C | -0.25986 | 0.59553  | -8.08415  |
| C | 0.25751  | 1.35589  | -6.91876  |
| C | -0.44875 | 0.98047  | -5.76841  |
| C | -1.37582 | -0.01722 | -6.06524  |
| C | -1.72626 | 0.72471  | -8.48373  |
| C | -1.75036 | 0.35479  | -9.93275  |
| C | -0.45633 | 0.08441  | -10.37472 |
| C | 0.46470  | 0.24186  | -9.33070  |
| H | -0.20365 | -0.23247 | -11.36983 |
| H | -2.64449 | 0.28556  | -10.52325 |
| H | -0.31646 | 1.42341  | -4.79845  |
| H | -2.06193 | -0.46544 | -5.37148  |
| H | -1.36060 | -1.38454 | -7.84025  |
| H | 1.02385  | 2.10582  | -6.97540  |
| H | -2.33513 | 1.53562  | -8.12052  |
| H | 1.52582  | 0.09033  | -9.39348  |

Aug-cc-pVTZ

Electronic energy: -345.4732388

Hartree

|   |          |          |           |
|---|----------|----------|-----------|
| C | -1.60532 | -0.56289 | -6.83891  |
| C | -1.26744 | 0.26560  | -8.01831  |
| C | -0.14226 | 1.18493  | -7.56152  |
| C | 0.13885  | 0.75588  | -6.16041  |
| C | -0.73404 | -0.25801 | -5.79182  |
| C | -2.16436 | 0.68975  | -9.11703  |
| C | -1.41136 | 0.91674  | -10.27026 |
| C | -0.07286 | 0.62698  | -10.04617 |
| C | 0.11997  | 0.16902  | -8.63929  |
| H | 0.72088  | 0.73934  | -10.75676 |
| H | -1.80785 | 1.29400  | -11.19205 |
| H | 0.92310  | 1.16024  | -5.55294  |
| H | -0.72031 | -0.76060 | -4.84502  |
| H | -2.37313 | -1.30970 | -6.82373  |
| H | -0.13277 | 2.22710  | -7.82099  |
| H | -3.21995 | 0.83949  | -9.01306  |
| H | 0.77213  | -0.65648 | -8.42305  |

6-311++G(d,p)

Electronic energy: -345.4373234

Hartree

|   |          |          |           |
|---|----------|----------|-----------|
| C | -1.30753 | -0.36002 | -7.52332  |
| C | -0.25845 | 0.59600  | -8.08424  |
| C | 0.25916  | 1.34958  | -6.91567  |
| C | -0.44637 | 0.96958  | -5.76802  |
| C | -1.37173 | -0.02629 | -6.06728  |
| C | -1.72631 | 0.72783  | -8.48070  |
| C | -1.75220 | 0.36461  | -9.93085  |
| C | -0.46090 | 0.09459  | -10.37497 |
| C | 0.46193  | 0.24780  | -9.33372  |
| H | -0.21023 | -0.21944 | -11.37142 |
| H | -2.64709 | 0.29730  | -10.52030 |
| H | -0.31386 | 1.40908  | -4.79660  |
| H | -2.05743 | -0.47656 | -5.37455  |
| H | -1.35940 | -1.38478 | -7.84897  |
| H | 1.02448  | 2.10069  | -6.96859  |
| H | -2.33329 | 1.53685  | -8.11200  |
| H | 1.52250  | 0.09459  | -9.40011  |

### *HF, quintuplet*

6-31+G(d,p)

Electronic energy: -345.304672 Hartree

|   |          |          |           |
|---|----------|----------|-----------|
| C | -1.14203 | -0.63040 | -7.00551  |
| C | -0.75627 | 0.40911  | -8.05248  |
| C | -0.07453 | 1.45646  | -7.16043  |
| C | -0.38420 | 1.11024  | -5.72520  |
| C | -0.95488 | -0.13562 | -5.69876  |
| C | -1.95436 | 0.93668  | -8.85480  |
| C | -1.54851 | 0.98955  | -10.30674 |
| C | -0.35369 | 0.33172  | -10.44165 |
| C | 0.13328  | -0.08799 | -9.18700  |
| H | 0.15748  | 0.16596  | -11.37275 |
| H | -2.11938 | 1.45087  | -11.08887 |
| H | -0.16985 | 1.73635  | -4.88112  |
| H | -1.23794 | -0.66561 | -4.80730  |
| H | -1.53197 | -1.59997 | -7.25730  |
| H | 0.88787  | 1.85483  | -7.43708  |
| H | -2.95636 | 0.65909  | -8.57127  |
| H | 1.02860  | -0.65987 | -9.02304  |

Aug-cc-pVTZ

Electronic energy: -345.3929722

|   |          |          |           |
|---|----------|----------|-----------|
| C | -1.39199 | -0.64036 | -6.99770  |
| C | -0.94254 | 0.37364  | -8.03987  |
| C | -0.38297 | 1.46907  | -7.12650  |
| C | -0.28852 | 0.90633  | -5.73390  |
| C | -0.93285 | -0.29433 | -5.71431  |
| C | -2.02226 | 0.87201  | -8.98968  |
| C | -1.58947 | 0.82675  | -10.32695 |
| C | -0.35367 | 0.26006  | -10.42091 |
| C | 0.06191  | -0.19439 | -9.04771  |
| H | 0.22666  | 0.13434  | -11.31108 |
| H | -2.15842 | 1.20154  | -11.15540 |
| H | 0.19027  | 1.38918  | -4.90770  |
| H | -1.06652 | -0.90605 | -4.84342  |
| H | -0.64422 | 2.49857  | -7.29269  |
| H | -1.96673 | -1.51280 | -7.23949  |
| H | -2.97673 | 1.22881  | -8.65553  |
| H | 0.49488  | -1.16599 | -8.89188  |

6-311++G(d,p)

Electronic energy: -345.358243 Hartree

|   |          |          |           |
|---|----------|----------|-----------|
| C | -1.14704 | -0.62781 | -7.00735  |
| C | -0.75704 | 0.41133  | -8.05236  |
| C | -0.07537 | 1.45615  | -7.15847  |
| C | -0.38101 | 1.10439  | -5.72370  |
| C | -0.95565 | -0.13672 | -5.70046  |
| C | -1.95148 | 0.94255  | -8.85639  |
| C | -1.54581 | 0.98682  | -10.30869 |
| C | -0.35348 | 0.32941  | -10.44017 |
| C | 0.13321  | -0.08712 | -9.18502  |
| H | 0.15732  | 0.15974  | -11.37071 |
| H | -2.11714 | 1.44274  | -11.09356 |
| H | -0.15996 | 1.72512  | -4.87745  |
| H | -1.23828 | -0.66836 | -4.80990  |
| H | -1.54057 | -1.59562 | -7.26007  |
| H | 0.88382  | 1.86154  | -7.43656  |
| H | -2.95612 | 0.67685  | -8.57033  |
| H | 1.02788  | -0.65962 | -9.02011  |

### *M06-2X, closed-shell singlet*

6-31+G(d,p)

Electronic energy: -347.5534581

Hartree

|   |          |          |           |
|---|----------|----------|-----------|
| C | -1.22534 | -0.65093 | -7.09480  |
| C | -0.76339 | 0.43067  | -8.05125  |
| C | -0.15692 | 1.45023  | -7.10747  |
| C | -0.26069 | 1.01563  | -5.84053  |
| C | -0.92913 | -0.29894 | -5.83260  |
| C | -1.88241 | 0.99457  | -8.90440  |
| C | -1.58663 | 0.83640  | -10.20527 |
| C | -0.27681 | 0.16961  | -10.32661 |
| C | 0.21118  | -0.07119 | -9.09834  |
| H | 0.20414  | -0.08056 | -11.26506 |
| H | -2.20249 | 1.14457  | -11.04213 |
| H | 0.08672  | 1.53704  | -4.95621  |
| H | -1.14143 | -0.87833 | -4.94163  |
| H | -1.71677 | -1.55468 | -7.43408  |
| H | 0.28211  | 2.37648  | -7.45775  |
| H | -2.76790 | 1.44741  | -8.47519  |
| H | 1.14905  | -0.54660 | -8.83802  |

Aug-cc-pVTZ

Electronic energy: -347.659787 Hartree

|   |          |          |           |
|---|----------|----------|-----------|
| C | -1.22365 | -0.64738 | -7.09574  |
| C | -0.76344 | 0.43070  | -8.05124  |
| C | -0.15880 | 1.44678  | -7.10835  |
| C | -0.26191 | 1.01458  | -5.84845  |
| C | -0.92904 | -0.29742 | -5.84055  |
| C | -1.87887 | 0.99278  | -8.90383  |
| C | -1.58474 | 0.83549  | -10.19748 |
| C | -0.27748 | 0.17000  | -10.31854 |
| C | 0.20774  | -0.06943 | -9.09706  |
| H | 0.20223  | -0.07955 | -11.25326 |
| H | -2.19880 | 1.14275  | -11.03092 |
| H | 0.08450  | 1.53455  | -4.96770  |
| H | -1.14080 | -0.87518 | -4.95317  |
| H | -1.71334 | -1.54804 | -7.43285  |
| H | 0.27877  | 2.36982  | -7.45642  |
| H | -2.76140 | 1.44410  | -8.47713  |
| H | 1.14230  | -0.54316 | -8.83859  |

6-311++G(d,p)

Electronic energy: -347.6232343

Hartree

|   |          |          |           |
|---|----------|----------|-----------|
| C | -1.22495 | -0.65004 | -7.09516  |
| C | -0.76343 | 0.43071  | -8.05124  |
| C | -0.15741 | 1.44940  | -7.10780  |
| C | -0.26102 | 1.01561  | -5.84443  |
| C | -0.92933 | -0.29871 | -5.83651  |
| C | -1.88155 | 0.99414  | -8.90415  |
| C | -1.58621 | 0.83621  | -10.20140 |
| C | -0.27663 | 0.16954  | -10.32268 |
| C | 0.21033  | -0.07075 | -9.09787  |
| H | 0.20353  | -0.08026 | -11.25946 |
| H | -2.20102 | 1.14384  | -11.03679 |
| H | 0.08586  | 1.53612  | -4.96168  |
| H | -1.14125 | -0.87714 | -4.94712  |
| H | -1.71551 | -1.55219 | -7.43371  |
| H | 0.28084  | 2.37404  | -7.45730  |
| H | -2.76551 | 1.44619  | -8.47588  |
| H | 1.14653  | -0.54532 | -8.83812  |

***M06-2X, restricted open shell singlet***

6-31+G(d,p)

Electronic energy: -347.5534581

Hartree

|   |          |          |           |
|---|----------|----------|-----------|
| C | -1.22534 | -0.65093 | -7.09480  |
| C | -0.76339 | 0.43067  | -8.05125  |
| C | -0.15692 | 1.45023  | -7.10747  |
| C | -0.26069 | 1.01563  | -5.84053  |
| C | -0.92913 | -0.29894 | -5.83260  |
| C | -1.88241 | 0.99457  | -8.90440  |
| C | -1.58663 | 0.83640  | -10.20527 |
| C | -0.27681 | 0.16961  | -10.32661 |
| C | 0.21118  | -0.07119 | -9.09834  |
| H | 0.20414  | -0.08056 | -11.26506 |
| H | -2.20249 | 1.14457  | -11.04213 |
| H | 0.08672  | 1.53704  | -4.95621  |
| H | -1.14143 | -0.87833 | -4.94163  |
| H | -1.71677 | -1.55468 | -7.43408  |
| H | 0.28211  | 2.37648  | -7.45775  |
| H | -2.76790 | 1.44741  | -8.47519  |
| H | 1.14905  | -0.54660 | -8.83802  |

Aug-cc-pVTZ

Electronic energy: -347.659787 Hartree

|   |          |          |           |
|---|----------|----------|-----------|
| C | -1.22365 | -0.64738 | -7.09574  |
| C | -0.76344 | 0.43070  | -8.05124  |
| C | -0.15880 | 1.44678  | -7.10835  |
| C | -0.26192 | 1.01458  | -5.84845  |
| C | -0.92904 | -0.29742 | -5.84055  |
| C | -1.87887 | 0.99278  | -8.90383  |
| C | -1.58474 | 0.83549  | -10.19748 |
| C | -0.27748 | 0.17000  | -10.31854 |
| C | 0.20774  | -0.06943 | -9.09706  |
| H | 0.20223  | -0.07955 | -11.25326 |
| H | -2.19880 | 1.14274  | -11.03092 |
| H | 0.08450  | 1.53455  | -4.96770  |
| H | -1.14080 | -0.87518 | -4.95317  |
| H | -1.71333 | -1.54804 | -7.43285  |
| H | 0.27877  | 2.36982  | -7.45642  |
| H | -2.76140 | 1.44410  | -8.47713  |
| H | 1.14230  | -0.54316 | -8.83860  |

6-311++G(d,p)

Electronic energy: -347.6232343

Hartree

|   |          |          |           |
|---|----------|----------|-----------|
| C | -1.22495 | -0.65004 | -7.09516  |
| C | -0.76343 | 0.43071  | -8.05124  |
| C | -0.15741 | 1.44940  | -7.10780  |
| C | -0.26102 | 1.01561  | -5.84443  |
| C | -0.92933 | -0.29871 | -5.83651  |
| C | -1.88155 | 0.99414  | -8.90415  |
| C | -1.58621 | 0.83621  | -10.20140 |
| C | -0.27663 | 0.16954  | -10.32268 |
| C | 0.21033  | -0.07075 | -9.09787  |
| H | 0.20353  | -0.08026 | -11.25946 |
| H | -2.20102 | 1.14384  | -11.03679 |
| H | 0.08586  | 1.53612  | -4.96168  |
| H | -1.14125 | -0.87714 | -4.94712  |
| H | -1.71551 | -1.55219 | -7.43371  |
| H | 0.28084  | 2.37404  | -7.45730  |
| H | -2.76551 | 1.44619  | -8.47588  |
| H | 1.14653  | -0.54532 | -8.83812  |



***M06-2X, triplet***

6-31+G(d,p)

Electronic energy: -347.4630957

Hartree

|   |          |          |           |
|---|----------|----------|-----------|
| C | -1.22080 | -0.63907 | -7.11008  |
| C | -0.76566 | 0.43164  | -8.08062  |
| C | -0.16392 | 1.43944  | -7.12260  |
| C | -0.28049 | 0.96003  | -5.75063  |
| C | -0.89542 | -0.24934 | -5.74335  |
| C | -1.88387 | 0.99511  | -8.93899  |
| C | -1.58799 | 0.83688  | -10.24242 |
| C | -0.28097 | 0.17150  | -10.36344 |
| C | 0.20742  | -0.06949 | -9.13262  |
| H | 0.19648  | -0.07692 | -11.30442 |
| H | -2.20071 | 1.14346  | -11.08247 |
| H | 0.07541  | 1.50086  | -4.88266  |
| H | -1.11849 | -0.84718 | -4.86850  |
| H | -1.71373 | -1.54994 | -7.42166  |
| H | 0.28007  | 2.37136  | -7.44531  |
| H | -2.76968 | 1.44814  | -8.50953  |
| H | 1.14563  | -0.54508 | -8.87203  |

Aug-cc-pVTZ

Electronic energy: -347.569001 Hartree

|   |          |          |           |
|---|----------|----------|-----------|
| C | -1.21948 | -0.63570 | -7.11233  |
| C | -0.76586 | 0.43169  | -8.08137  |
| C | -0.16589 | 1.43631  | -7.12486  |
| C | -0.28247 | 0.95707  | -5.75749  |
| C | -0.89423 | -0.24603 | -5.75021  |
| C | -1.88032 | 0.99327  | -8.93882  |
| C | -1.58603 | 0.83596  | -10.23503 |
| C | -0.28166 | 0.17195  | -10.35569 |
| C | 0.20384  | -0.06769 | -9.13161  |
| H | 0.19459  | -0.07581 | -11.29288 |
| H | -2.19687 | 1.14164  | -11.07167 |
| H | 0.07172  | 1.49451  | -4.89164  |
| H | -1.11558 | -0.84047 | -4.87749  |
| H | -1.71074 | -1.54358 | -7.42149  |
| H | 0.27666  | 2.36515  | -7.44516  |
| H | -2.76296 | 1.44465  | -8.51136  |
| H | 1.13857  | -0.54152 | -8.87221  |

6-311++G(d,p)

Electronic energy: -347.5329538

Hartree

|   |          |          |           |
|---|----------|----------|-----------|
| C | -1.22089 | -0.63868 | -7.11165  |
| C | -0.76580 | 0.43166  | -8.08098  |
| C | -0.16432 | 1.43921  | -7.12422  |
| C | -0.28140 | 0.95860  | -5.75386  |
| C | -0.89481 | -0.24777 | -5.74655  |
| C | -1.88302 | 0.99465  | -8.93879  |
| C | -1.58746 | 0.83668  | -10.23863 |
| C | -0.28081 | 0.17149  | -10.35953 |
| C | 0.20652  | -0.06906 | -9.13212  |
| H | 0.19592  | -0.07653 | -11.29878 |
| H | -2.19911 | 1.14277  | -11.07719 |
| H | 0.07360  | 1.49747  | -4.88666  |
| H | -1.11684 | -0.84369 | -4.87246  |
| H | -1.71307 | -1.54823 | -7.42229  |
| H | 0.27900  | 2.36978  | -7.44602  |
| H | -2.76712 | 1.44677  | -8.50994  |
| H | 1.14289  | -0.54375 | -8.87166  |

### *M06-2X, quintuplet*

6-31+G(d,p)

Electronic energy: -347.3682796

Hartree

|   |          |          |           |
|---|----------|----------|-----------|
| C | -1.21582 | -0.63635 | -7.05604  |
| C | -0.76417 | 0.43110  | -8.05117  |
| C | -0.16305 | 1.43437  | -7.06844  |
| C | -0.27527 | 0.95754  | -5.69668  |
| C | -0.89005 | -0.25169 | -5.68944  |
| C | -1.87038 | 0.98824  | -8.94526  |
| C | -1.54459 | 0.81398  | -10.35423 |
| C | -0.33969 | 0.20065  | -10.46502 |
| C | 0.19293  | -0.06204 | -9.13499  |
| H | 0.16159  | -0.05989 | -11.38896 |
| H | -2.17753 | 1.13087  | -11.17386 |
| H | 0.08190  | 1.49746  | -4.82850  |
| H | -1.11162 | -0.85008 | -4.81443  |
| H | -1.71176 | -1.54957 | -7.36106  |
| H | 0.28110  | 2.37020  | -7.38455  |
| H | -2.76790 | 1.44763  | -8.54980  |
| H | 1.13760  | -0.54103 | -8.90888  |

Aug-cc-pVTZ

Electronic energy: -347.4736683

Hartree

|   |          |          |           |
|---|----------|----------|-----------|
| C | -1.21561 | -0.63236 | -7.05788  |
| C | -0.76502 | 0.43154  | -8.05110  |
| C | -0.16612 | 1.43182  | -7.07021  |
| C | -0.27595 | 0.95393  | -5.70346  |
| C | -0.88760 | -0.24908 | -5.69627  |
| C | -1.86725 | 0.98669  | -8.94435  |
| C | -1.54048 | 0.81191  | -10.34833 |
| C | -0.34169 | 0.20169  | -10.45768 |
| C | 0.18968  | -0.06035 | -9.13201  |
| H | 0.15694  | -0.05751 | -11.37878 |
| H | -2.16947 | 1.12676  | -11.16652 |
| H | 0.08087  | 1.48980  | -4.83759  |
| H | -1.10615 | -0.84483 | -4.82362  |
| H | -1.71206 | -1.54128 | -7.36080  |
| H | 0.27422  | 2.36557  | -7.38417  |
| H | -2.76196 | 1.44462  | -8.55174  |
| H | 1.13092  | -0.53753 | -8.90680  |

6-311++G(d,p)

Electronic energy: -347.4380936

Hartree

|   |          |          |           |
|---|----------|----------|-----------|
| C | -1.21602 | -0.63593 | -7.05755  |
| C | -0.76431 | 0.43122  | -8.05116  |
| C | -0.16350 | 1.43428  | -7.06986  |
| C | -0.27604 | 0.95599  | -5.69983  |
| C | -0.88931 | -0.25024 | -5.69265  |
| C | -1.87003 | 0.98817  | -8.94393  |
| C | -1.54281 | 0.81301  | -10.35130 |
| C | -0.34087 | 0.20118  | -10.46166 |
| C | 0.19279  | -0.06188 | -9.13334  |
| H | 0.15865  | -0.05857 | -11.38453 |
| H | -2.17378 | 1.12879  | -11.17034 |
| H | 0.08036  | 1.49391  | -4.83248  |
| H | -1.10976 | -0.84689 | -4.81853  |
| H | -1.71151 | -1.54754 | -7.36193  |
| H | 0.27954  | 2.36886  | -7.38525  |
| H | -2.76612 | 1.44702  | -8.54935  |
| H | 1.13600  | -0.53999 | -8.90762  |

***PBE0, closed-shell singlet***

6-31+G(d,p)

Electronic energy: -347.2944869

Hartree

|   |          |          |           |
|---|----------|----------|-----------|
| C | -1.22480 | -0.64961 | -7.09664  |
| C | -0.76333 | 0.43068  | -8.05125  |
| C | -0.15764 | 1.44903  | -7.10924  |
| C | -0.26236 | 1.01240  | -5.84047  |
| C | -0.92752 | -0.29569 | -5.83262  |
| C | -1.88098 | 0.99388  | -8.90269  |
| C | -1.58343 | 0.83472  | -10.20558 |
| C | -0.28005 | 0.17123  | -10.32635 |
| C | 0.21010  | -0.07059 | -9.09645  |
| H | 0.20188  | -0.07949 | -11.26534 |
| H | -2.20044 | 1.14340  | -11.04274 |
| H | 0.08558  | 1.53484  | -4.95570  |
| H | -1.14041 | -0.87614 | -4.94123  |
| H | -1.71655 | -1.55423 | -7.43387  |
| H | 0.28198  | 2.37604  | -7.45746  |
| H | -2.76744 | 1.44720  | -8.47541  |
| H | 1.14868  | -0.54629 | -8.83828  |

Aug-cc-pVTZ

Electronic energy: -347.3694059

Hartree

|   |          |          |           |
|---|----------|----------|-----------|
| C | -1.22296 | -0.64576 | -7.09789  |
| C | -0.76333 | 0.43068  | -8.05125  |
| C | -0.15967 | 1.44526  | -7.11044  |
| C | -0.26375 | 1.01113  | -5.84856  |
| C | -0.92736 | -0.29389 | -5.84072  |
| C | -1.87709 | 0.99191  | -8.90181  |
| C | -1.58129 | 0.83368  | -10.19762 |
| C | -0.28097 | 0.17175  | -10.31811 |
| C | 0.20641  | -0.06870 | -9.09487  |
| H | 0.20046  | -0.07870 | -11.25400 |
| H | -2.19733 | 1.14189  | -11.03182 |
| H | 0.08358  | 1.53294  | -4.96682  |
| H | -1.14010 | -0.87351 | -4.95237  |
| H | -1.71344 | -1.54835 | -7.43258  |
| H | 0.27908  | 2.37007  | -7.45610  |
| H | -2.76164 | 1.44424  | -8.47728  |
| H | 1.14268  | -0.54324 | -8.83906  |

6-311++G(d,p)

Electronic energy: -347.3529092

Hartree

|   |          |          |           |
|---|----------|----------|-----------|
| C | -1.22422 | -0.64830 | -7.09750  |
| C | -0.76333 | 0.43068  | -8.05125  |
| C | -0.15836 | 1.44777  | -7.11009  |
| C | -0.26296 | 1.01206  | -5.84510  |
| C | -0.92762 | -0.29506 | -5.83725  |
| C | -1.87964 | 0.99320  | -8.90195  |
| C | -1.58259 | 0.83432  | -10.20099 |
| C | -0.28018 | 0.17133  | -10.32167 |
| C | 0.20889  | -0.06997 | -9.09547  |
| H | 0.20137  | -0.07919 | -11.25958 |
| H | -2.19906 | 1.14274  | -11.03716 |
| H | 0.08467  | 1.53408  | -4.96137  |
| H | -1.14036 | -0.87502 | -4.94690  |
| H | -1.71544 | -1.55204 | -7.43393  |
| H | 0.28087  | 2.37385  | -7.45749  |
| H | -2.76526 | 1.44609  | -8.47557  |
| H | 1.14651  | -0.54519 | -8.83803  |

***PBE0, restricted open shell singlet***

PBE0/6-31+G(d,p)

Electronic energy: -347.2944869

Hartree

|   |          |          |           |
|---|----------|----------|-----------|
| C | -1.22480 | -0.64961 | -7.09664  |
| C | -0.76333 | 0.43068  | -8.05125  |
| C | -0.15764 | 1.44903  | -7.10924  |
| C | -0.26236 | 1.01240  | -5.84047  |
| C | -0.92752 | -0.29569 | -5.83262  |
| C | -1.88098 | 0.99388  | -8.90269  |
| C | -1.58343 | 0.83472  | -10.20558 |
| C | -0.28005 | 0.17123  | -10.32635 |
| C | 0.21010  | -0.07059 | -9.09645  |
| H | 0.20188  | -0.07949 | -11.26534 |
| H | -2.20044 | 1.14340  | -11.04274 |
| H | 0.08558  | 1.53484  | -4.95570  |
| H | -1.14041 | -0.87614 | -4.94123  |
| H | -1.71655 | -1.55423 | -7.43387  |
| H | 0.28198  | 2.37604  | -7.45746  |
| H | -2.76744 | 1.44720  | -8.47541  |
| H | 1.14868  | -0.54629 | -8.83828  |

Aug-cc-pVTZ

Electronic energy: -347.3694059

Hartree

|   |          |          |           |
|---|----------|----------|-----------|
| C | -1.22296 | -0.64576 | -7.09789  |
| C | -0.76333 | 0.43068  | -8.05125  |
| C | -0.15967 | 1.44526  | -7.11044  |
| C | -0.26375 | 1.01113  | -5.84856  |
| C | -0.92736 | -0.29389 | -5.84072  |
| C | -1.87709 | 0.99191  | -8.90181  |
| C | -1.58129 | 0.83368  | -10.19762 |
| C | -0.28097 | 0.17175  | -10.31811 |
| C | 0.20641  | -0.06870 | -9.09487  |
| H | 0.20046  | -0.07870 | -11.25400 |
| H | -2.19733 | 1.14189  | -11.03182 |
| H | 0.08358  | 1.53294  | -4.96682  |
| H | -1.14010 | -0.87351 | -4.95237  |
| H | -1.71344 | -1.54835 | -7.43258  |
| H | 0.27908  | 2.37007  | -7.45610  |
| H | -2.76164 | 1.44424  | -8.47728  |
| H | 1.14268  | -0.54324 | -8.83906  |

6-311++G(d,p)

Electronic energy: -347.3529092

Hartree

|   |          |          |           |
|---|----------|----------|-----------|
| C | -1.22422 | -0.64830 | -7.09750  |
| C | -0.76333 | 0.43068  | -8.05125  |
| C | -0.15836 | 1.44777  | -7.11009  |
| C | -0.26296 | 1.01206  | -5.84510  |
| C | -0.92762 | -0.29506 | -5.83725  |
| C | -1.87964 | 0.99320  | -8.90195  |
| C | -1.58259 | 0.83432  | -10.20099 |
| C | -0.28018 | 0.17133  | -10.32167 |
| C | 0.20889  | -0.06997 | -9.09547  |
| H | 0.20137  | -0.07919 | -11.25958 |
| H | -2.19906 | 1.14274  | -11.03716 |
| H | 0.08467  | 1.53408  | -4.96137  |
| H | -1.14036 | -0.87502 | -4.94690  |
| H | -1.71544 | -1.55204 | -7.43393  |
| H | 0.28087  | 2.37385  | -7.45749  |
| H | -2.76526 | 1.44609  | -8.47557  |
| H | 1.14651  | -0.54519 | -8.83803  |

**PBE0, triplet**

6-31+G(d,p)

Electronic energy: -347.2152273

Hartree

|   |          |          |           |
|---|----------|----------|-----------|
| C | -1.22042 | -0.63843 | -7.11041  |
| C | -0.76555 | 0.43162  | -8.08002  |
| C | -0.16417 | 1.43876  | -7.12290  |
| C | -0.28003 | 0.96225  | -5.75611  |
| C | -0.89700 | -0.25106 | -5.74881  |
| C | -1.88129 | 0.99383  | -8.93398  |
| C | -1.58386 | 0.83474  | -10.24113 |
| C | -0.28497 | 0.17354  | -10.36147 |
| C | 0.20565  | -0.06852 | -9.12732  |
| H | 0.19344  | -0.07539 | -11.30304 |
| H | -2.19775 | 1.14184  | -11.08150 |
| H | 0.07584  | 1.50303  | -4.88675  |
| H | -1.12009 | -0.84886 | -4.87261  |
| H | -1.71373 | -1.55072 | -7.42223  |
| H | 0.28085  | 2.37178  | -7.44581  |
| H | -2.76829 | 1.44743  | -8.50736  |
| H | 1.14467  | -0.54445 | -8.86987  |

Aug-cc-pVTZ

Electronic energy: -347.2892894

Hartree

|   |          |          |           |
|---|----------|----------|-----------|
| C | -1.21879 | -0.63478 | -7.11285  |
| C | -0.76558 | 0.43163  | -8.08049  |
| C | -0.16617 | 1.43526  | -7.12531  |
| C | -0.28217 | 0.95943  | -5.76365  |
| C | -0.89602 | -0.24775 | -5.75639  |
| C | -1.87732 | 0.99182  | -8.93313  |
| C | -1.58162 | 0.83365  | -10.23332 |
| C | -0.28600 | 0.17411  | -10.35336 |
| C | 0.20187  | -0.06660 | -9.12576  |
| H | 0.19185  | -0.07450 | -11.29185 |
| H | -2.19449 | 1.14026  | -11.07076 |
| H | 0.07216  | 1.49743  | -4.89572  |
| H | -1.11778 | -0.84267 | -4.88164  |
| H | -1.71077 | -1.54489 | -7.42231  |
| H | 0.27787  | 2.36595  | -7.44583  |
| H | -2.76221 | 1.44433  | -8.50879  |
| H | 1.13845  | -0.54130 | -8.87017  |

6-311++G(d,p)

Electronic energy: -347.2729566

Hartree

|   |          |          |           |
|---|----------|----------|-----------|
| C | -1.22012 | -0.63750 | -7.11228  |
| C | -0.76556 | 0.43162  | -8.08016  |
| C | -0.16476 | 1.43794  | -7.12476  |
| C | -0.28114 | 0.96087  | -5.76042  |
| C | -0.89655 | -0.24939 | -5.75314  |
| C | -1.87990 | 0.99313  | -8.93313  |
| C | -1.58295 | 0.83430  | -10.23651 |
| C | -0.28518 | 0.17367  | -10.35674 |
| C | 0.20441  | -0.06789 | -9.12623  |
| H | 0.19287  | -0.07506 | -11.29722 |
| H | -2.19631 | 1.14115  | -11.07587 |
| H | 0.07389  | 1.50000  | -4.89118  |
| H | -1.11881 | -0.84554 | -4.87707  |
| H | -1.71291 | -1.54890 | -7.42341  |
| H | 0.27984  | 2.37004  | -7.44698  |
| H | -2.76593 | 1.44623  | -8.50706  |
| H | 1.14238  | -0.54329 | -8.86914  |

***PBE0, quintuplet***

6-31+G(d,p)

Electronic energy: -347.1291115

Hartree

|   |          |          |           |
|---|----------|----------|-----------|
| C | -1.21363 | -0.63524 | -7.05525  |
| C | -0.76333 | 0.43065  | -8.05125  |
| C | -0.16249 | 1.43191  | -7.06770  |
| C | -0.27604 | 0.95986  | -5.69923  |
| C | -0.89243 | -0.25232 | -5.69193  |
| C | -1.86846 | 0.98721  | -8.94560  |
| C | -1.54637 | 0.81504  | -10.35095 |
| C | -0.33855 | 0.20020  | -10.46289 |
| C | 0.19125  | -0.06127 | -9.13648  |
| H | 0.16262  | -0.06018 | -11.38819 |
| H | -2.18024 | 1.13245  | -11.17107 |
| H | 0.07993  | 1.50096  | -4.82996  |
| H | -1.11572 | -0.85037 | -4.81579  |
| H | -1.70819 | -1.55188 | -7.35729  |
| H | 0.28537  | 2.36859  | -7.38091  |
| H | -2.76841 | 1.44715  | -8.55240  |
| H | 1.13796  | -0.54136 | -8.91442  |

Aug-cc-pVTZ

Electronic energy: -347.2020709

Hartree

|   |          |          |           |
|---|----------|----------|-----------|
| C | -1.21196 | -0.63157 | -7.05739  |
| C | -0.76335 | 0.43062  | -8.05125  |
| C | -0.16449 | 1.42837  | -7.06985  |
| C | -0.27815 | 0.95706  | -5.70664  |
| C | -0.89142 | -0.24900 | -5.69935  |
| C | -1.86472 | 0.98527  | -8.94379  |
| C | -1.54273 | 0.81329  | -10.34383 |
| C | -0.34101 | 0.20155  | -10.45519 |
| C | 0.18780  | -0.05956 | -9.13400  |
| H | 0.15755  | -0.05742 | -11.37873 |
| H | -2.17372 | 1.12931  | -11.16268 |
| H | 0.07631  | 1.49547  | -4.83887  |
| H | -1.11342 | -0.84423 | -4.82472  |
| H | -1.70519 | -1.54607 | -7.35692  |
| H | 0.28242  | 2.36273  | -7.38056  |
| H | -2.76268 | 1.44408  | -8.55330  |
| H | 1.13205  | -0.53851 | -8.91423  |

6-311++G(d,p)

Electronic energy: -347.1860142

Hartree

|   |          |          |           |
|---|----------|----------|-----------|
| C | -1.21335 | -0.63435 | -7.05709  |
| C | -0.76334 | 0.43063  | -8.05125  |
| C | -0.16306 | 1.43113  | -7.06958  |
| C | -0.27714 | 0.95849  | -5.70363  |
| C | -0.89197 | -0.25064 | -5.69632  |
| C | -1.86750 | 0.98669  | -8.94381  |
| C | -1.54449 | 0.81415  | -10.34671 |
| C | -0.33971 | 0.20087  | -10.45836 |
| C | 0.19054  | -0.06095 | -9.13453  |
| H | 0.15988  | -0.05865 | -11.38334 |
| H | -2.17673 | 1.13079  | -11.16681 |
| H | 0.07801  | 1.49800  | -4.83452  |
| H | -1.11444 | -0.84706 | -4.82034  |
| H | -1.70740 | -1.55010 | -7.35847  |
| H | 0.28437  | 2.36687  | -7.38215  |
| H | -2.76662 | 1.44612  | -8.55136  |
| H | 1.13625  | -0.54062 | -8.91305  |

***PBE0[GD3BJ], closed-shell singlet***

6-31+G(d,p)

Electronic energy: -347.4017529

Hartree

|   |          |          |           |
|---|----------|----------|-----------|
| C | -1.22506 | -0.64984 | -7.09813  |
| C | -0.76333 | 0.43068  | -8.05125  |
| C | -0.15762 | 1.44936  | -7.11074  |
| C | -0.26243 | 1.01256  | -5.84213  |
| C | -0.92770 | -0.29575 | -5.83427  |
| C | -1.88114 | 0.99397  | -8.90117  |
| C | -1.58342 | 0.83472  | -10.20391 |
| C | -0.27982 | 0.17112  | -10.32470 |
| C | 0.21049  | -0.07078 | -9.09498  |
| H | 0.20170  | -0.07938 | -11.26377 |
| H | -2.20002 | 1.14320  | -11.04123 |
| H | 0.08531  | 1.53459  | -4.95724  |
| H | -1.14037 | -0.87580 | -4.94277  |
| H | -1.71655 | -1.55364 | -7.43714  |
| H | 0.28149  | 2.37566  | -7.46073  |
| H | -2.76671 | 1.44685  | -8.47218  |
| H | 1.14845  | -0.54615 | -8.83496  |

Aug-cc-pVTZ

Electronic energy: -347.3852495

Hartree

|   |          |          |           |
|---|----------|----------|-----------|
| C | -1.22324 | -0.64605 | -7.09934  |
| C | -0.76333 | 0.43068  | -8.05125  |
| C | -0.15961 | 1.44565  | -7.11190  |
| C | -0.26380 | 1.01132  | -5.85015  |
| C | -0.92755 | -0.29398 | -5.84232  |
| C | -1.87732 | 0.99203  | -8.90033  |
| C | -1.58131 | 0.83369  | -10.19601 |
| C | -0.28070 | 0.17162  | -10.31653 |
| C | 0.20685  | -0.06892 | -9.09345  |
| H | 0.20028  | -0.07860 | -11.25252 |
| H | -2.19693 | 1.14169  | -11.03039 |
| H | 0.08332  | 1.53269  | -4.96828  |
| H | -1.14007 | -0.87317 | -4.95383  |
| H | -1.71347 | -1.54781 | -7.43583  |
| H | 0.27861  | 2.36975  | -7.45934  |
| H | -2.76096 | 1.44392  | -8.47407  |
| H | 1.14250  | -0.54313 | -8.83577  |

6-311++G(d,p)

Electronic energy: -347.3109719

Hartree

|   |          |          |           |
|---|----------|----------|-----------|
| C | -1.22448 | -0.64855 | -7.09897  |
| C | -0.76333 | 0.43068  | -8.05125  |
| C | -0.15832 | 1.44812  | -7.11156  |
| C | -0.26302 | 1.01223  | -5.84672  |
| C | -0.92781 | -0.29512 | -5.83887  |
| C | -1.87982 | 0.99330  | -8.90045  |
| C | -1.58259 | 0.83433  | -10.19936 |
| C | -0.27994 | 0.17122  | -10.32006 |
| C | 0.20930  | -0.07017 | -9.09403  |
| H | 0.20119  | -0.07909 | -11.25805 |
| H | -2.19866 | 1.14254  | -11.03568 |
| H | 0.08440  | 1.53384  | -4.96287  |
| H | -1.14032 | -0.87468 | -4.94841  |
| H | -1.71545 | -1.55146 | -7.43719  |
| H | 0.28038  | 2.37349  | -7.46075  |
| H | -2.76454 | 1.44574  | -8.47235  |
| H | 1.14628  | -0.54505 | -8.83472  |

***PBE0[GD3BJ], restricted open shell singlet***

6-31+G(d,p)

Electronic energy: -347.4017529

Hartree

|   |          |          |           |
|---|----------|----------|-----------|
| C | -1.22506 | -0.64984 | -7.09813  |
| C | -0.76333 | 0.43068  | -8.05125  |
| C | -0.15762 | 1.44936  | -7.11074  |
| C | -0.26243 | 1.01256  | -5.84213  |
| C | -0.92770 | -0.29575 | -5.83427  |
| C | -1.88114 | 0.99397  | -8.90117  |
| C | -1.58342 | 0.83472  | -10.20391 |
| C | -0.27982 | 0.17112  | -10.32470 |
| C | 0.21049  | -0.07078 | -9.09498  |
| H | 0.20170  | -0.07938 | -11.26377 |
| H | -2.20002 | 1.14320  | -11.04123 |
| H | 0.08531  | 1.53459  | -4.95724  |
| H | -1.14037 | -0.87580 | -4.94277  |
| H | -1.71655 | -1.55364 | -7.43714  |
| H | 0.28149  | 2.37566  | -7.46073  |
| H | -2.76671 | 1.44685  | -8.47218  |
| H | 1.14845  | -0.54615 | -8.83496  |

Aug-cc-pVTZ

Electronic energy: -347.3852495

Hartree

|   |          |          |           |
|---|----------|----------|-----------|
| C | -1.22324 | -0.64605 | -7.09934  |
| C | -0.76333 | 0.43068  | -8.05125  |
| C | -0.15961 | 1.44565  | -7.11190  |
| C | -0.26380 | 1.01132  | -5.85015  |
| C | -0.92755 | -0.29398 | -5.84232  |
| C | -1.87732 | 0.99203  | -8.90033  |
| C | -1.58131 | 0.83369  | -10.19601 |
| C | -0.28070 | 0.17162  | -10.31653 |
| C | 0.20685  | -0.06892 | -9.09345  |
| H | 0.20028  | -0.07860 | -11.25252 |
| H | -2.19693 | 1.14169  | -11.03039 |
| H | 0.08332  | 1.53269  | -4.96828  |
| H | -1.14007 | -0.87317 | -4.95383  |
| H | -1.71347 | -1.54781 | -7.43583  |
| H | 0.27861  | 2.36975  | -7.45934  |
| H | -2.76096 | 1.44392  | -8.47407  |
| H | 1.14250  | -0.54313 | -8.83577  |

6-311++G(d,p)

Electronic energy: -347.3109719

Hartree

|   |          |          |           |
|---|----------|----------|-----------|
| C | -1.22448 | -0.64855 | -7.09897  |
| C | -0.76333 | 0.43068  | -8.05125  |
| C | -0.15832 | 1.44812  | -7.11156  |
| C | -0.26302 | 1.01223  | -5.84672  |
| C | -0.92781 | -0.29512 | -5.83887  |
| C | -1.87982 | 0.99330  | -8.90045  |
| C | -1.58259 | 0.83433  | -10.19936 |
| C | -0.27994 | 0.17122  | -10.32006 |
| C | 0.20930  | -0.07017 | -9.09403  |
| H | 0.20119  | -0.07909 | -11.25805 |
| H | -2.19866 | 1.14254  | -11.03568 |
| H | 0.08440  | 1.53384  | -4.96287  |
| H | -1.14032 | -0.87468 | -4.94841  |
| H | -1.71545 | -1.55146 | -7.43719  |
| H | 0.28038  | 2.37349  | -7.46075  |
| H | -2.76454 | 1.44574  | -8.47235  |
| H | 1.14628  | -0.54505 | -8.83472  |



***PBE0[GD3BJ], triplet***

6-31+G(d,p)

Electronic energy: -347.3213069

Hartree

|   |          |          |           |
|---|----------|----------|-----------|
| C | -1.22080 | -0.63887 | -7.11196  |
| C | -0.76554 | 0.43162  | -8.07993  |
| C | -0.16404 | 1.43930  | -7.12446  |
| C | -0.28014 | 0.96239  | -5.75806  |
| C | -0.89718 | -0.25107 | -5.75077  |
| C | -1.88139 | 0.99390  | -8.93229  |
| C | -1.58380 | 0.83472  | -10.23936 |
| C | -0.28476 | 0.17344  | -10.35971 |
| C | 0.20601  | -0.06870 | -9.12568  |
| H | 0.19325  | -0.07528 | -11.30135 |
| H | -2.19730 | 1.14162  | -11.07988 |
| H | 0.07550  | 1.50266  | -4.88851  |
| H | -1.12000 | -0.84838 | -4.87437  |
| H | -1.71386 | -1.55037 | -7.42553  |
| H | 0.28047  | 2.37165  | -7.44912  |
| H | -2.76750 | 1.44705  | -8.50396  |
| H | 1.14439  | -0.54429 | -8.86637  |

Aug-cc-pVTZ

Electronic energy: -347.3049675

Hartree

|   |          |          |           |
|---|----------|----------|-----------|
| C | -1.21920 | -0.63529 | -7.11438  |
| C | -0.76558 | 0.43162  | -8.08038  |
| C | -0.16601 | 1.43587  | -7.12684  |
| C | -0.28227 | 0.95958  | -5.76556  |
| C | -0.89620 | -0.24777 | -5.75829  |
| C | -1.87749 | 0.99192  | -8.93148  |
| C | -1.58160 | 0.83365  | -10.23160 |
| C | -0.28576 | 0.17401  | -10.35165 |
| C | 0.20229  | -0.06680 | -9.12416  |
| H | 0.19166  | -0.07439 | -11.29023 |
| H | -2.19405 | 1.14004  | -11.06921 |
| H | 0.07182  | 1.49705  | -4.89741  |
| H | -1.11768 | -0.84218 | -4.88333  |
| H | -1.71093 | -1.54460 | -7.42560  |
| H | 0.27753  | 2.36588  | -7.44913  |
| H | -2.76147 | 1.44397  | -8.50540  |
| H | 1.13823  | -0.54117 | -8.86668  |

6-311++G(d,p)

Electronic energy: -347.2315468

Hartree

|   |          |          |           |
|---|----------|----------|-----------|
| C | -1.22050 | -0.63796 | -7.11381  |
| C | -0.76555 | 0.43162  | -8.08006  |
| C | -0.16462 | 1.43850  | -7.12630  |
| C | -0.28124 | 0.96100  | -5.76235  |
| C | -0.89673 | -0.24940 | -5.75507  |
| C | -1.88003 | 0.99321  | -8.93147  |
| C | -1.58290 | 0.83429  | -10.23477 |
| C | -0.28496 | 0.17357  | -10.35501 |
| C | 0.20479  | -0.06807 | -9.12461  |
| H | 0.19268  | -0.07495 | -11.29556 |
| H | -2.19587 | 1.14094  | -11.07428 |
| H | 0.07355  | 1.49963  | -4.89291  |
| H | -1.11872 | -0.84506 | -4.87881  |
| H | -1.71305 | -1.54856 | -7.42671  |
| H | 0.27947  | 2.36992  | -7.45029  |
| H | -2.76515 | 1.44585  | -8.50366  |
| H | 1.14211  | -0.54314 | -8.86563  |

***PBE0[GD3BJ], quintuplet***

6-31+G(d,p)

Electronic energy: -347.2337374

Hartree

|   |          |          |           |
|---|----------|----------|-----------|
| C | -1.21396 | -0.63559 | -7.05684  |
| C | -0.76333 | 0.43065  | -8.05125  |
| C | -0.16241 | 1.43237  | -7.06930  |
| C | -0.27616 | 0.95998  | -5.70119  |
| C | -0.89260 | -0.25231 | -5.69388  |
| C | -1.86874 | 0.98737  | -8.94396  |
| C | -1.54627 | 0.81500  | -10.34900 |
| C | -0.33834 | 0.20011  | -10.46094 |
| C | 0.19177  | -0.06153 | -9.13491  |
| H | 0.16236  | -0.06003 | -11.38636 |
| H | -2.17971 | 1.13220  | -11.16932 |
| H | 0.07959  | 1.50062  | -4.83174  |
| H | -1.11565 | -0.84991 | -4.81758  |
| H | -1.70829 | -1.55148 | -7.36057  |
| H | 0.28497  | 2.36841  | -7.38419  |
| H | -2.76787 | 1.44689  | -8.54915  |
| H | 1.13791  | -0.54133 | -8.91111  |

Aug-cc-pVTZ

Electronic energy: -347.2176743

Hartree

|   |          |          |           |
|---|----------|----------|-----------|
| C | -1.21233 | -0.63200 | -7.05897  |
| C | -0.76335 | 0.43061  | -8.05125  |
| C | -0.16437 | 1.42890  | -7.07145  |
| C | -0.27825 | 0.95720  | -5.70857  |
| C | -0.89160 | -0.24900 | -5.70127  |
| C | -1.86509 | 0.98545  | -8.94215  |
| C | -1.54264 | 0.81328  | -10.34190 |
| C | -0.34079 | 0.20147  | -10.45327 |
| C | 0.18839  | -0.05987 | -9.13245  |
| H | 0.15730  | -0.05723 | -11.37694 |
| H | -2.17316 | 1.12908  | -11.16098 |
| H | 0.07598  | 1.49513  | -4.84063  |
| H | -1.11333 | -0.84376 | -4.82646  |
| H | -1.70533 | -1.54574 | -7.36020  |
| H | 0.28204  | 2.36260  | -7.38388  |
| H | -2.76223 | 1.44380  | -8.55003  |
| H | 1.13204  | -0.53856 | -8.91092  |

6-311++G(d,p)

Electronic energy: -347.1451531

Hartree

|   |          |          |           |
|---|----------|----------|-----------|
| C | -1.21369 | -0.63473 | -7.05868  |
| C | -0.76335 | 0.43062  | -8.05125  |
| C | -0.16297 | 1.43161  | -7.07118  |
| C | -0.27725 | 0.95862  | -5.70557  |
| C | -0.89214 | -0.25063 | -5.69825  |
| C | -1.86782 | 0.98685  | -8.94218  |
| C | -1.54439 | 0.81414  | -10.34477 |
| C | -0.33950 | 0.20079  | -10.45642 |
| C | 0.19108  | -0.06123 | -9.13298  |
| H | 0.15964  | -0.05848 | -11.38152 |
| H | -2.17618 | 1.13056  | -11.16507 |
| H | 0.07768  | 1.49767  | -4.83630  |
| H | -1.11437 | -0.84660 | -4.82212  |
| H | -1.70751 | -1.54971 | -7.36175  |
| H | 0.28397  | 2.36670  | -7.38545  |
| H | -2.76611 | 1.44584  | -8.54810  |
| H | 1.13620  | -0.54062 | -8.90972  |

***PBEPBE, closed-shell singlet***

6-31+G(d,p)

Electronic energy: -347.2564637

Hartree

|   |          |          |           |
|---|----------|----------|-----------|
| C | -1.22822 | -0.65731 | -7.09125  |
| C | -0.76332 | 0.43069  | -8.05125  |
| C | -0.15341 | 1.45638  | -7.10394  |
| C | -0.26000 | 1.01397  | -5.82367  |
| C | -0.92732 | -0.29837 | -5.81579  |
| C | -1.88888 | 0.99787  | -8.90734  |
| C | -1.58683 | 0.83634  | -10.22220 |
| C | -0.27922 | 0.17070  | -10.34336 |
| C | 0.21720  | -0.07423 | -9.10249  |
| H | 0.20608  | -0.08177 | -11.28934 |
| H | -2.20821 | 1.14721  | -11.06563 |
| H | 0.09041  | 1.54008  | -4.93229  |
| H | -1.14168 | -0.88292 | -4.91775  |
| H | -1.72324 | -1.56757 | -7.43278  |
| H | 0.28883  | 2.38932  | -7.45653  |
| H | -2.78078 | 1.45399  | -8.47519  |
| H | 1.16187  | -0.55300 | -8.84052  |

Aug-cc-pVTZ

Electronic energy: -347.3496508

Hartree

|   |          |          |           |
|---|----------|----------|-----------|
| C | -1.22625 | -0.65314 | -7.09288  |
| C | -0.76332 | 0.43069  | -8.05125  |
| C | -0.15562 | 1.45232  | -7.10552  |
| C | -0.26162 | 1.01246  | -5.83289  |
| C | -0.92710 | -0.29625 | -5.82504  |
| C | -1.88466 | 0.99573  | -8.90611  |
| C | -1.58432 | 0.83512  | -10.21313 |
| C | -0.28032 | 0.17132  | -10.33396 |
| C | 0.21322  | -0.07220 | -9.10050  |
| H | 0.20397  | -0.08063 | -11.27640 |
| H | -2.20418 | 1.14524  | -11.05325 |
| H | 0.08789  | 1.53742  | -4.94494  |
| H | -1.14108 | -0.87943 | -4.93043  |
| H | -1.71972 | -1.56086 | -7.43165  |
| H | 0.28549  | 2.38253  | -7.45531  |
| H | -2.77414 | 1.45060  | -8.47699  |
| H | 1.15506  | -0.54954 | -8.84107  |

6-311++G(d,p)

Electronic energy: -347.317919 Hartree

|   |          |          |           |
|---|----------|----------|-----------|
| C | -1.22757 | -0.65582 | -7.09232  |
| C | -0.76333 | 0.43069  | -8.05125  |
| C | -0.15423 | 1.45496  | -7.10498  |
| C | -0.26077 | 1.01345  | -5.82912  |
| C | -0.92738 | -0.29749 | -5.82126  |
| C | -1.88735 | 0.99710  | -8.90642  |
| C | -1.58572 | 0.83581  | -10.21680 |
| C | -0.27949 | 0.17088  | -10.33783 |
| C | 0.21583  | -0.07353 | -9.10130  |
| H | 0.20500  | -0.08118 | -11.28233 |
| H | -2.20608 | 1.14617  | -11.05892 |
| H | 0.08908  | 1.53870  | -4.93915  |
| H | -1.14139 | -0.88109 | -4.92462  |
| H | -1.72179 | -1.56472 | -7.43280  |
| H | 0.28738  | 2.38647  | -7.45652  |
| H | -2.77794 | 1.45254  | -8.47545  |
| H | 1.15903  | -0.55156 | -8.84025  |

**PBEPBE, restricted open shell singlet**

6-31+G(d,p)

Electronic energy: -347.2564637

Hartree

|   |          |          |           |
|---|----------|----------|-----------|
| C | -1.22822 | -0.65731 | -7.09125  |
| C | -0.76332 | 0.43069  | -8.05125  |
| C | -0.15341 | 1.45638  | -7.10394  |
| C | -0.26000 | 1.01397  | -5.82367  |
| C | -0.92732 | -0.29837 | -5.81579  |
| C | -1.88888 | 0.99787  | -8.90734  |
| C | -1.58683 | 0.83634  | -10.22220 |
| C | -0.27922 | 0.17070  | -10.34336 |
| C | 0.21720  | -0.07423 | -9.10249  |
| H | 0.20608  | -0.08177 | -11.28934 |
| H | -2.20821 | 1.14721  | -11.06563 |
| H | 0.09041  | 1.54008  | -4.93229  |
| H | -1.14168 | -0.88292 | -4.91775  |
| H | -1.72324 | -1.56757 | -7.43278  |
| H | 0.28883  | 2.38932  | -7.45653  |
| H | -2.78078 | 1.45399  | -8.47519  |
| H | 1.16187  | -0.55300 | -8.84052  |

Aug-cc-pVTZ

Electronic energy: -347.3496508

Hartree

|   |          |          |           |
|---|----------|----------|-----------|
| C | -1.22625 | -0.65314 | -7.09288  |
| C | -0.76332 | 0.43069  | -8.05125  |
| C | -0.15562 | 1.45232  | -7.10552  |
| C | -0.26162 | 1.01246  | -5.83289  |
| C | -0.92710 | -0.29625 | -5.82504  |
| C | -1.88466 | 0.99573  | -8.90611  |
| C | -1.58432 | 0.83512  | -10.21313 |
| C | -0.28032 | 0.17132  | -10.33396 |
| C | 0.21322  | -0.07220 | -9.10050  |
| H | 0.20397  | -0.08063 | -11.27640 |
| H | -2.20418 | 1.14524  | -11.05325 |
| H | 0.08789  | 1.53742  | -4.94494  |
| H | -1.14108 | -0.87943 | -4.93043  |
| H | -1.71972 | -1.56086 | -7.43165  |
| H | 0.28549  | 2.38253  | -7.45531  |
| H | -2.77414 | 1.45060  | -8.47699  |
| H | 1.15506  | -0.54954 | -8.84107  |

6-311++G(d,p)

Electronic energy: -347.317919 Hartree

|   |          |          |           |
|---|----------|----------|-----------|
| C | -1.22757 | -0.65582 | -7.09232  |
| C | -0.76333 | 0.43069  | -8.05125  |
| C | -0.15423 | 1.45496  | -7.10498  |
| C | -0.26077 | 1.01345  | -5.82912  |
| C | -0.92738 | -0.29749 | -5.82126  |
| C | -1.88736 | 0.99710  | -8.90642  |
| C | -1.58572 | 0.83581  | -10.21680 |
| C | -0.27949 | 0.17088  | -10.33783 |
| C | 0.21583  | -0.07353 | -9.10130  |
| H | 0.20500  | -0.08118 | -11.28233 |
| H | -2.20608 | 1.14617  | -11.05892 |
| H | 0.08908  | 1.53870  | -4.93915  |
| H | -1.14138 | -0.88109 | -4.92462  |
| H | -1.72179 | -1.56472 | -7.43280  |
| H | 0.28738  | 2.38647  | -7.45652  |
| H | -2.77794 | 1.45254  | -8.47545  |
| H | 1.15903  | -0.55156 | -8.84025  |

**PBEPBE, triplet**

6-31+G(d,p)

Electronic energy: -347.176554 Hartree

|   |          |          |           |
|---|----------|----------|-----------|
| C | -1.22366 | -0.64612 | -7.10311  |
| C | -0.76529 | 0.43151  | -8.07673  |
| C | -0.15983 | 1.44597  | -7.11570  |
| C | -0.27514 | 0.96995  | -5.74557  |
| C | -0.90029 | -0.25945 | -5.73817  |
| C | -1.88711 | 0.99679  | -8.93440  |
| C | -1.58592 | 0.83569  | -10.25673 |
| C | -0.28530 | 0.17361  | -10.37723 |
| C | 0.21133  | -0.07142 | -9.12881  |
| H | 0.19618  | -0.07692 | -11.32608 |
| H | -2.20394 | 1.14485  | -11.10372 |
| H | 0.08348  | 1.51505  | -4.87033  |
| H | -1.12523 | -0.86196 | -4.85604  |
| H | -1.72014 | -1.56334 | -7.42222  |
| H | 0.28726  | 2.38440  | -7.44596  |
| H | -2.77961 | 1.45321  | -8.50293  |
| H | 1.15649  | -0.55045 | -8.86759  |

Aug-cc-pVTZ

Electronic energy: -347.268695 Hartree

|   |          |          |           |
|---|----------|----------|-----------|
| C | -1.22197 | -0.64226 | -7.10613  |
| C | -0.76534 | 0.43152  | -8.07730  |
| C | -0.16198 | 1.44230  | -7.11867  |
| C | -0.27755 | 0.96681  | -5.75430  |
| C | -0.89921 | -0.25573 | -5.74694  |
| C | -1.88280 | 0.99461  | -8.93303  |
| C | -1.58325 | 0.83439  | -10.24772 |
| C | -0.28657 | 0.17432  | -10.36785 |
| C | 0.20729  | -0.06936 | -9.12667  |
| H | 0.19387  | -0.07566 | -11.31315 |
| H | -2.19970 | 1.14278  | -11.09140 |
| H | 0.07931  | 1.50880  | -4.88102  |
| H | -1.12268 | -0.85500 | -4.86680  |
| H | -1.71683 | -1.55674 | -7.42266  |
| H | 0.28388  | 2.37782  | -7.44634  |
| H | -2.77261 | 1.44964  | -8.50398  |
| H | 1.14943  | -0.54687 | -8.86734  |

6-311++G(d,p)

Electronic energy: -347.2372093

Hartree

|   |          |          |           |
|---|----------|----------|-----------|
| C | -1.22334 | -0.64509 | -7.10531  |
| C | -0.76531 | 0.43151  | -8.07688  |
| C | -0.16049 | 1.44508  | -7.11789  |
| C | -0.27643 | 0.96836  | -5.75079  |
| C | -0.89979 | -0.25752 | -5.74341  |
| C | -1.88555 | 0.99600  | -8.93325  |
| C | -1.58468 | 0.83510  | -10.25124 |
| C | -0.28569 | 0.17385  | -10.37158 |
| C | 0.20996  | -0.07072 | -9.12739  |
| H | 0.19503  | -0.07628 | -11.31892 |
| H | -2.20171 | 1.14377  | -11.09687 |
| H | 0.08109  | 1.51139  | -4.87605  |
| H | -1.12370 | -0.85792 | -4.86179  |
| H | -1.71903 | -1.56089 | -7.42354  |
| H | 0.28593  | 2.38204  | -7.44726  |
| H | -2.77655 | 1.45165  | -8.50252  |
| H | 1.15353  | -0.54895 | -8.86662  |

**PBEPBE, quintuplet**

6-31+G(d,p)

Electronic energy: -347.0853666

Hartree

|   |          |          |           |
|---|----------|----------|-----------|
| C | -1.21524 | -0.64185 | -7.04572  |
| C | -0.76306 | 0.43010  | -8.05129  |
| C | -0.15817 | 1.43707  | -7.05883  |
| C | -0.27184 | 0.96725  | -5.68380  |
| C | -0.89557 | -0.25945 | -5.67607  |
| C | -1.87516 | 0.98991  | -8.95393  |
| C | -1.55478 | 0.81997  | -10.36561 |
| C | -0.33255 | 0.19779  | -10.47934 |
| C | 0.19620  | -0.06451 | -9.14668  |
| H | 0.17310  | -0.06409 | -11.41094 |
| H | -2.19386 | 1.14081  | -11.19069 |
| H | 0.08628  | 1.51367  | -4.80898  |
| H | -1.12165 | -0.86193 | -4.79400  |
| H | -1.71194 | -1.56540 | -7.35235  |
| H | 0.29387  | 2.37937  | -7.37728  |
| H | -2.78139 | 1.45173  | -8.55500  |
| H | 1.14903  | -0.54904 | -8.92080  |

Aug-cc-pVTZ

Electronic energy: -347.1762981

Hartree

|   |          |          |           |
|---|----------|----------|-----------|
| C | -1.16162 | -0.67119 | -7.02284  |
| C | -0.74688 | 0.37928  | -8.05418  |
| C | -0.11486 | 1.39906  | -7.09728  |
| C | -0.32423 | 1.02099  | -5.71155  |
| C | -0.94159 | -0.20008 | -5.66785  |
| C | -1.88623 | 0.93147  | -8.92137  |
| C | -1.54164 | 0.89232  | -10.33089 |
| C | -0.33013 | 0.27251  | -10.47967 |
| C | 0.16783  | -0.11929 | -9.17396  |
| H | 0.18432  | 0.08706  | -11.42029 |
| H | -2.16173 | 1.28863  | -11.13260 |
| H | -0.02472 | 1.61900  | -4.85306  |
| H | -1.21945 | -0.74659 | -4.76900  |
| H | -1.54091 | -1.65307 | -7.30154  |
| H | 0.44035  | 2.26822  | -7.44590  |
| H | -2.83225 | 1.27188  | -8.50377  |
| H | 1.05704  | -0.71883 | -8.98556  |

6-311++G(d,p)

Electronic energy: -347.1450386

Hartree

|   |          |          |           |
|---|----------|----------|-----------|
| C | -1.25617 | -0.61070 | -7.07069  |
| C | -0.77769 | 0.47442  | -8.04874  |
| C | -0.20264 | 1.46531  | -7.03024  |
| C | -0.23309 | 0.91844  | -5.68269  |
| C | -0.85410 | -0.30535 | -5.70641  |
| C | -1.85906 | 1.03690  | -8.97832  |
| C | -1.55820 | 0.75540  | -10.37334 |
| C | -0.33627 | 0.13567  | -10.45515 |
| C | 0.21387  | -0.01440 | -9.11688  |
| H | 0.15839  | -0.19052 | -11.37022 |
| H | -2.20687 | 1.01003  | -11.21144 |
| H | 0.17019  | 1.41733  | -4.80151  |
| H | -1.03132 | -0.95234 | -4.84710  |
| H | -1.84126 | -1.47452 | -7.38862  |
| H | 0.15384  | 2.45787  | -7.30893  |
| H | -2.72131 | 1.59492  | -8.61080  |
| H | 1.20497  | -0.39708 | -8.87023  |

***PW91, closed-shell singlet***

6-31+G(d,p)

Electronic energy: -347.5673203

Hartree

|   |          |          |           |
|---|----------|----------|-----------|
| C | -1.22793 | -0.65672 | -7.09133  |
| C | -0.76333 | 0.43069  | -8.05125  |
| C | -0.15371 | 1.45580  | -7.10400  |
| C | -0.26027 | 1.01367  | -5.82496  |
| C | -0.92724 | -0.29798 | -5.81709  |
| C | -1.88830 | 0.99758  | -8.90733  |
| C | -1.58639 | 0.83613  | -10.22093 |
| C | -0.27946 | 0.17083  | -10.34203 |
| C | 0.21662  | -0.07394 | -9.10236  |
| H | 0.20492  | -0.08117 | -11.28660 |
| H | -2.20665 | 1.14643  | -11.06314 |
| H | 0.08953  | 1.53880  | -4.93490  |
| H | -1.14118 | -0.88148 | -4.92038  |
| H | -1.72222 | -1.56571 | -7.43200  |
| H | 0.28793  | 2.38741  | -7.45571  |
| H | -2.77896 | 1.45306  | -8.47617  |
| H | 1.15993  | -0.55202 | -8.84114  |

Aug-cc-pVTZ

Electronic energy: -347.6638474

Hartree

|   |          |          |           |
|---|----------|----------|-----------|
| C | -1.22588 | -0.65240 | -7.09298  |
| C | -0.76332 | 0.43068  | -8.05125  |
| C | -0.15600 | 1.45158  | -7.10560  |
| C | -0.26199 | 1.01206  | -5.83460  |
| C | -0.92701 | -0.29574 | -5.82675  |
| C | -1.88392 | 0.99535  | -8.90608  |
| C | -1.58374 | 0.83484  | -10.21146 |
| C | -0.28064 | 0.17150  | -10.33221 |
| C | 0.21249  | -0.07183 | -9.10035  |
| H | 0.20261  | -0.07991 | -11.27318 |
| H | -2.20236 | 1.14432  | -11.05033 |
| H | 0.08683  | 1.53592  | -4.94799  |
| H | -1.14051 | -0.87773 | -4.93351  |
| H | -1.71854 | -1.55870 | -7.43084  |
| H | 0.28445  | 2.38031  | -7.45448  |
| H | -2.77202 | 1.44952  | -8.47800  |
| H | 1.15282  | -0.54841 | -8.84170  |

6-311++G(d,p)

Electronic energy: -347.6309368

Hartree

|   |          |          |           |
|---|----------|----------|-----------|
| C | -1.22727 | -0.65522 | -7.09238  |
| C | -0.76333 | 0.43069  | -8.05125  |
| C | -0.15454 | 1.45437  | -7.10504  |
| C | -0.26106 | 1.01314  | -5.83065  |
| C | -0.92732 | -0.29708 | -5.82278  |
| C | -1.88676 | 0.99679  | -8.90641  |
| C | -1.58525 | 0.83558  | -10.21531 |
| C | -0.27973 | 0.17101  | -10.33627 |
| C | 0.21524  | -0.07323 | -9.10118  |
| H | 0.20372  | -0.08051 | -11.27937 |
| H | -2.20437 | 1.14532  | -11.05624 |
| H | 0.08810  | 1.53729  | -4.94195  |
| H | -1.14083 | -0.87950 | -4.92745  |
| H | -1.72072 | -1.56272 | -7.43215  |
| H | 0.28641  | 2.38443  | -7.45584  |
| H | -2.77598 | 1.45154  | -8.47630  |
| H | 1.15697  | -0.55052 | -8.84073  |

**PW91, restricted open shell singlet**

6-31+G(d,p)

Electronic energy: -347.5673203

Hartree

|   |          |          |           |
|---|----------|----------|-----------|
| C | -1.22793 | -0.65672 | -7.09133  |
| C | -0.76333 | 0.43069  | -8.05125  |
| C | -0.15371 | 1.45580  | -7.10400  |
| C | -0.26027 | 1.01367  | -5.82496  |
| C | -0.92724 | -0.29798 | -5.81709  |
| C | -1.88830 | 0.99758  | -8.90733  |
| C | -1.58639 | 0.83613  | -10.22093 |
| C | -0.27946 | 0.17083  | -10.34203 |
| C | 0.21662  | -0.07394 | -9.10236  |
| H | 0.20492  | -0.08117 | -11.28660 |
| H | -2.20665 | 1.14643  | -11.06314 |
| H | 0.08953  | 1.53880  | -4.93490  |
| H | -1.14118 | -0.88148 | -4.92038  |
| H | -1.72222 | -1.56571 | -7.43200  |
| H | 0.28793  | 2.38741  | -7.45571  |
| H | -2.77896 | 1.45306  | -8.47617  |
| H | 1.15993  | -0.55202 | -8.84114  |

Aug-cc-pVTZ

Electronic energy: -347.6638474

Hartree

|   |          |          |           |
|---|----------|----------|-----------|
| C | -1.22588 | -0.65240 | -7.09298  |
| C | -0.76332 | 0.43068  | -8.05125  |
| C | -0.15600 | 1.45158  | -7.10560  |
| C | -0.26199 | 1.01206  | -5.83460  |
| C | -0.92701 | -0.29574 | -5.82675  |
| C | -1.88392 | 0.99535  | -8.90608  |
| C | -1.58374 | 0.83484  | -10.21146 |
| C | -0.28064 | 0.17150  | -10.33221 |
| C | 0.21249  | -0.07183 | -9.10035  |
| H | 0.20261  | -0.07991 | -11.27318 |
| H | -2.20236 | 1.14432  | -11.05033 |
| H | 0.08683  | 1.53592  | -4.94799  |
| H | -1.14051 | -0.87773 | -4.93351  |
| H | -1.71854 | -1.55870 | -7.43084  |
| H | 0.28445  | 2.38031  | -7.45448  |
| H | -2.77202 | 1.44952  | -8.47800  |
| H | 1.15282  | -0.54841 | -8.84170  |

6-311++G(d,p)

Electronic energy: -347.6309368

Hartree

|   |          |          |           |
|---|----------|----------|-----------|
| C | -1.22727 | -0.65522 | -7.09238  |
| C | -0.76333 | 0.43069  | -8.05125  |
| C | -0.15454 | 1.45437  | -7.10504  |
| C | -0.26106 | 1.01314  | -5.83065  |
| C | -0.92732 | -0.29708 | -5.82278  |
| C | -1.88676 | 0.99679  | -8.90641  |
| C | -1.58525 | 0.83558  | -10.21531 |
| C | -0.27973 | 0.17101  | -10.33627 |
| C | 0.21524  | -0.07323 | -9.10118  |
| H | 0.20372  | -0.08051 | -11.27937 |
| H | -2.20437 | 1.14532  | -11.05624 |
| H | 0.08810  | 1.53729  | -4.94195  |
| H | -1.14083 | -0.87950 | -4.92745  |
| H | -1.72072 | -1.56272 | -7.43215  |
| H | 0.28641  | 2.38443  | -7.45584  |
| H | -2.77598 | 1.45154  | -8.47630  |
| H | 1.15697  | -0.55052 | -8.84073  |



**PW91, triplet**

6-31+G(d,p)

Electronic energy: -347.4877247

Hartree

|   |          |          |           |
|---|----------|----------|-----------|
| C | -1.22347 | -0.64568 | -7.10347  |
| C | -0.76530 | 0.43151  | -8.07673  |
| C | -0.16008 | 1.44555  | -7.11605  |
| C | -0.27551 | 0.96945  | -5.74687  |
| C | -0.90011 | -0.25886 | -5.73947  |
| C | -1.88653 | 0.99650  | -8.93430  |
| C | -1.58545 | 0.83546  | -10.25534 |
| C | -0.28555 | 0.17375  | -10.37577 |
| C | 0.21077  | -0.07114 | -9.12860  |
| H | 0.19509  | -0.07634 | -11.32315 |
| H | -2.20241 | 1.14410  | -11.10103 |
| H | 0.08248  | 1.51354  | -4.87287  |
| H | -1.12460 | -0.86028 | -4.85858  |
| H | -1.71925 | -1.56165 | -7.42174  |
| H | 0.28643  | 2.38268  | -7.44547  |
| H | -2.77778 | 1.45227  | -8.50379  |
| H | 1.15455  | -0.54947 | -8.86809  |

Aug-cc-pVTZ

Electronic energy: -347.5830868

Hartree

|   |          |          |           |
|---|----------|----------|-----------|
| C | -1.22169 | -0.64165 | -7.10654  |
| C | -0.76533 | 0.43152  | -8.07728  |
| C | -0.16230 | 1.44171  | -7.11907  |
| C | -0.27804 | 0.96616  | -5.75594  |
| C | -0.89898 | -0.25497 | -5.74859  |
| C | -1.88208 | 0.99424  | -8.93295  |
| C | -1.58266 | 0.83410  | -10.24593 |
| C | -0.28690 | 0.17449  | -10.36599 |
| C | 0.20660  | -0.06900 | -9.12647  |
| H | 0.19256  | -0.07498 | -11.30977 |
| H | -2.19792 | 1.14189  | -11.08829 |
| H | 0.07810  | 1.50701  | -4.88394  |
| H | -1.12197 | -0.85301 | -4.86975  |
| H | -1.71576 | -1.55475 | -7.42221  |
| H | 0.28290  | 2.37579  | -7.44585  |
| H | -2.77048 | 1.44856  | -8.50489  |
| H | 1.14721  | -0.54573 | -8.86787  |

6-311++G(d,p)

Electronic energy: -347.550482 Hartree

|   |          |          |           |
|---|----------|----------|-----------|
| C | -1.22314 | -0.64463 | -7.10570  |
| C | -0.76531 | 0.43151  | -8.07687  |
| C | -0.16074 | 1.44464  | -7.11827  |
| C | -0.27686 | 0.96779  | -5.75227  |
| C | -0.89959 | -0.25685 | -5.74489  |
| C | -1.88496 | 0.99570  | -8.93318  |
| C | -1.58418 | 0.83486  | -10.24964 |
| C | -0.28594 | 0.17399  | -10.36991 |
| C | 0.20939  | -0.07043 | -9.12721  |
| H | 0.19381  | -0.07564 | -11.31578 |
| H | -2.20004 | 1.14294  | -11.09400 |
| H | 0.07998  | 1.50972  | -4.87876  |
| H | -1.12302 | -0.85606 | -4.86453  |
| H | -1.71807 | -1.55909 | -7.42319  |
| H | 0.28504  | 2.38021  | -7.44689  |
| H | -2.77457 | 1.45064  | -8.50325  |
| H | 1.15147  | -0.54791 | -8.86697  |

***PW91, quintuplet***

6-31+G(d,p)

Electronic energy: -347.3969013

Hartree

|   |          |          |           |
|---|----------|----------|-----------|
| C | -1.21532 | -0.64131 | -7.04644  |
| C | -0.76311 | 0.43035  | -8.05128  |
| C | -0.15859 | 1.43688  | -7.05922  |
| C | -0.27203 | 0.96648  | -5.68528  |
| C | -0.89523 | -0.25912 | -5.67774  |
| C | -1.87465 | 0.99002  | -8.95351  |
| C | -1.55418 | 0.81926  | -10.36419 |
| C | -0.33302 | 0.19763  | -10.47767 |
| C | 0.19601  | -0.06405 | -9.14594  |
| H | 0.17155  | -0.06414 | -11.40788 |
| H | -2.19219 | 1.13912  | -11.18823 |
| H | 0.08568  | 1.51160  | -4.81161  |
| H | -1.12062 | -0.86073 | -4.79702  |
| H | -1.71178 | -1.56326 | -7.35249  |
| H | 0.29236  | 2.37812  | -7.37676  |
| H | -2.77935 | 1.45181  | -8.55554  |
| H | 1.14775  | -0.54727 | -8.92051  |

Aug-cc-pVTZ

Electronic energy: -347.4909274

Hartree

|   |          |          |           |
|---|----------|----------|-----------|
| C | -1.16715 | -0.66701 | -7.02623  |
| C | -0.74866 | 0.38503  | -8.05386  |
| C | -0.12009 | 1.40279  | -7.09403  |
| C | -0.31858 | 1.01409  | -5.71079  |
| C | -0.93549 | -0.20546 | -5.67101  |
| C | -1.88440 | 0.93739  | -8.92402  |
| C | -1.54249 | 0.88298  | -10.33256 |
| C | -0.33180 | 0.26433  | -10.47732 |
| C | 0.17038  | -0.11251 | -9.17000  |
| H | 0.17998  | 0.07095  | -11.41569 |
| H | -2.16345 | 1.26947  | -11.13589 |
| H | -0.01308 | 1.60472  | -4.85165  |
| H | -1.20658 | -0.75665 | -4.77516  |
| H | -1.55938 | -1.64102 | -7.30760  |
| H | 0.42261  | 2.27904  | -7.43902  |
| H | -2.82458 | 1.29099  | -8.50882  |
| H | 1.06604  | -0.69776 | -8.97768  |

6-311++G(d,p)

Electronic energy: -347.4586232

Hartree

|   |          |          |           |
|---|----------|----------|-----------|
| C | -1.17603 | -0.66605 | -7.02918  |
| C | -0.75076 | 0.39161  | -8.05348  |
| C | -0.12528 | 1.41048  | -7.08850  |
| C | -0.30983 | 1.00707  | -5.70409  |
| C | -0.92866 | -0.21592 | -5.66926  |
| C | -1.88532 | 0.94639  | -8.92842  |
| C | -1.54616 | 0.87268  | -10.34014 |
| C | -0.33119 | 0.25297  | -10.48042 |
| C | 0.17760  | -0.10579 | -9.16679  |
| H | 0.17968  | 0.04857  | -11.41925 |
| H | -2.17106 | 1.24834  | -11.14816 |
| H | 0.00482  | 1.59090  | -4.84115  |
| H | -1.19209 | -0.77592 | -4.77417  |
| H | -1.58876 | -1.63214 | -7.31643  |
| H | 0.40036  | 2.30043  | -7.43142  |
| H | -2.82003 | 1.32031  | -8.51319  |
| H | 1.08599  | -0.67254 | -8.96726  |

***$\omega$ B97X[D], closed-shell singlet***

6-31+G(d,p)

Electronic energy: -347.5915652

Hartree

|   |          |          |           |
|---|----------|----------|-----------|
| C | -1.22485 | -0.65040 | -7.09350  |
| C | -0.76316 | 0.43071  | -8.05125  |
| C | -0.15693 | 1.44961  | -7.10603  |
| C | -0.26125 | 1.01457  | -5.83963  |
| C | -0.92867 | -0.29789 | -5.83178  |
| C | -1.88186 | 0.99436  | -8.90573  |
| C | -1.58571 | 0.83578  | -10.20614 |
| C | -0.27798 | 0.17012  | -10.32742 |
| C | 0.21064  | -0.07081 | -9.09979  |
| H | 0.20307  | -0.08020 | -11.26573 |
| H | -2.20190 | 1.14393  | -11.04271 |
| H | 0.08607  | 1.53620  | -4.95546  |
| H | -1.14132 | -0.87743 | -4.94105  |
| H | -1.71638 | -1.55480 | -7.42952  |
| H | 0.28274  | 2.37634  | -7.45293  |
| H | -2.76816 | 1.44759  | -8.47968  |
| H | 1.14894  | -0.54630 | -8.84295  |

Aug-cc-pVTZ

Electronic energy: -347.6852192

Hartree

|   |          |          |           |
|---|----------|----------|-----------|
| C | -1.22288 | -0.64625 | -7.09511  |
| C | -0.76310 | 0.43076  | -8.05126  |
| C | -0.15908 | 1.44562  | -7.10751  |
| C | -0.26286 | 1.01309  | -5.84875  |
| C | -0.92850 | -0.29581 | -5.84099  |
| C | -1.87765 | 0.99226  | -8.90455  |
| C | -1.58328 | 0.83455  | -10.19713 |
| C | -0.27907 | 0.17069  | -10.31810 |
| C | 0.20675  | -0.06877 | -9.09789  |
| H | 0.20074  | -0.07906 | -11.25265 |
| H | -2.19776 | 1.14177  | -11.03020 |
| H | 0.08341  | 1.53336  | -4.96818  |
| H | -1.14071 | -0.87376 | -4.95391  |
| H | -1.71266 | -1.54766 | -7.42873  |
| H | 0.27921  | 2.36920  | -7.45190  |
| H | -2.76107 | 1.44402  | -8.48121  |
| H | 1.14181  | -0.54261 | -8.84323  |

6-311++G(d,p)

Electronic energy: -347.6525889

Hartree

|   |          |          |           |
|---|----------|----------|-----------|
| C | -1.22424 | -0.64912 | -7.09437  |
| C | -0.76307 | 0.43073  | -8.05126  |
| C | -0.15757 | 1.44840  | -7.10682  |
| C | -0.26189 | 1.01429  | -5.84444  |
| C | -0.92886 | -0.29726 | -5.83664  |
| C | -1.88052 | 0.99371  | -8.90498  |
| C | -1.58492 | 0.83537  | -10.20132 |
| C | -0.27809 | 0.17016  | -10.32256 |
| C | 0.20952  | -0.07019 | -9.09889  |
| H | 0.20235  | -0.07990 | -11.25980 |
| H | -2.20045 | 1.14312  | -11.03690 |
| H | 0.08497  | 1.53533  | -4.96128  |
| H | -1.14134 | -0.87613 | -4.94695  |
| H | -1.71518 | -1.55254 | -7.42959  |
| H | 0.28166  | 2.37409  | -7.45285  |
| H | -2.76585 | 1.44646  | -8.47982  |
| H | 1.14676  | -0.54513 | -8.84283  |

***$\omega$ B97X[D], restricted open shell singlet***

6-31+G(d,p)

Electronic energy: -347.5915652

Hartree

|   |          |          |           |
|---|----------|----------|-----------|
| C | -1.22485 | -0.65040 | -7.09350  |
| C | -0.76316 | 0.43071  | -8.05125  |
| C | -0.15693 | 1.44961  | -7.10603  |
| C | -0.26125 | 1.01457  | -5.83963  |
| C | -0.92867 | -0.29789 | -5.83178  |
| C | -1.88186 | 0.99436  | -8.90573  |
| C | -1.58571 | 0.83578  | -10.20614 |
| C | -0.27798 | 0.17012  | -10.32742 |
| C | 0.21064  | -0.07081 | -9.09979  |
| H | 0.20307  | -0.08020 | -11.26573 |
| H | -2.20190 | 1.14393  | -11.04271 |
| H | 0.08607  | 1.53620  | -4.95546  |
| H | -1.14132 | -0.87743 | -4.94105  |
| H | -1.71638 | -1.55480 | -7.42952  |
| H | 0.28274  | 2.37634  | -7.45293  |
| H | -2.76816 | 1.44759  | -8.47968  |
| H | 1.14894  | -0.54630 | -8.84295  |

Aug-cc-pVTZ

Electronic energy: -347.6852192

Hartree

|   |          |          |           |
|---|----------|----------|-----------|
| C | -1.22288 | -0.64625 | -7.09511  |
| C | -0.76310 | 0.43076  | -8.05126  |
| C | -0.15908 | 1.44562  | -7.10751  |
| C | -0.26286 | 1.01309  | -5.84875  |
| C | -0.92850 | -0.29581 | -5.84099  |
| C | -1.87765 | 0.99226  | -8.90455  |
| C | -1.58328 | 0.83455  | -10.19713 |
| C | -0.27907 | 0.17069  | -10.31810 |
| C | 0.20675  | -0.06877 | -9.09789  |
| H | 0.20074  | -0.07906 | -11.25265 |
| H | -2.19776 | 1.14177  | -11.03020 |
| H | 0.08341  | 1.53336  | -4.96818  |
| H | -1.14072 | -0.87376 | -4.95391  |
| H | -1.71266 | -1.54766 | -7.42873  |
| H | 0.27921  | 2.36920  | -7.45190  |
| H | -2.76107 | 1.44402  | -8.48121  |
| H | 1.14181  | -0.54261 | -8.84324  |

6-311++G(d,p)

Electronic energy: -347.6525889

Hartree

|   |          |          |           |
|---|----------|----------|-----------|
| C | -1.22424 | -0.64912 | -7.09437  |
| C | -0.76307 | 0.43073  | -8.05126  |
| C | -0.15757 | 1.44840  | -7.10682  |
| C | -0.26189 | 1.01429  | -5.84444  |
| C | -0.92886 | -0.29726 | -5.83664  |
| C | -1.88052 | 0.99371  | -8.90498  |
| C | -1.58492 | 0.83537  | -10.20132 |
| C | -0.27809 | 0.17016  | -10.32256 |
| C | 0.20952  | -0.07019 | -9.09889  |
| H | 0.20235  | -0.07990 | -11.25980 |
| H | -2.20045 | 1.14312  | -11.03690 |
| H | 0.08497  | 1.53533  | -4.96128  |
| H | -1.14134 | -0.87613 | -4.94695  |
| H | -1.71518 | -1.55254 | -7.42959  |
| H | 0.28166  | 2.37409  | -7.45285  |
| H | -2.76585 | 1.44646  | -8.47982  |
| H | 1.14676  | -0.54513 | -8.84283  |

*$\omega$ B97X[D], triplet*

6-31+G(d,p)

Electronic energy: -347.5072496

Hartree

|   |          |          |           |
|---|----------|----------|-----------|
| C | -1.21996 | -0.63913 | -7.10938  |
| C | -0.76493 | 0.43162  | -8.07984  |
| C | -0.16322 | 1.43905  | -7.12154  |
| C | -0.28093 | 0.96099  | -5.75216  |
| C | -0.89653 | -0.24964 | -5.74505  |
| C | -1.88289 | 0.99481  | -8.93804  |
| C | -1.58666 | 0.83595  | -10.24165 |
| C | -0.28280 | 0.17222  | -10.36290 |
| C | 0.20707  | -0.06908 | -9.13239  |
| H | 0.19464  | -0.07653 | -11.30376 |
| H | -2.20017 | 1.14255  | -11.08109 |
| H | 0.07391  | 1.50135  | -4.88331  |
| H | -1.12001 | -0.84656 | -4.86953  |
| H | -1.71287 | -1.55172 | -7.41923  |
| H | 0.28241  | 2.37199  | -7.44219  |
| H | -2.76968 | 1.44838  | -8.51255  |
| H | 1.14590  | -0.54486 | -8.87669  |

Aug-cc-pVTZ

Electronic energy: -347.5995741

Hartree

|   |          |          |           |
|---|----------|----------|-----------|
| C | -1.21801 | -0.63508 | -7.11208  |
| C | -0.76482 | 0.43163  | -8.08016  |
| C | -0.16535 | 1.43512  | -7.12413  |
| C | -0.28341 | 0.95797  | -5.76068  |
| C | -0.89559 | -0.24598 | -5.75366  |
| C | -1.87860 | 0.99269  | -8.93695  |
| C | -1.58418 | 0.83472  | -10.23278 |
| C | -0.28402 | 0.17284  | -10.35379 |
| C | 0.20314  | -0.06704 | -9.13071  |
| H | 0.19209  | -0.07530 | -11.29093 |
| H | -2.19597 | 1.14043  | -11.06869 |
| H | 0.06934  | 1.49499  | -4.89392  |
| H | -1.11760 | -0.83931 | -4.88030  |
| H | -1.70894 | -1.54452 | -7.41955  |
| H | 0.27890  | 2.36465  | -7.44231  |
| H | -2.76232 | 1.44471  | -8.51376  |
| H | 1.13864  | -0.54115 | -8.87687  |

6-311++G(d,p)

Electronic energy: -347.5674751

Hartree

|   |          |          |           |
|---|----------|----------|-----------|
| C | -1.21941 | -0.63819 | -7.11128  |
| C | -0.76472 | 0.43159  | -8.07995  |
| C | -0.16365 | 1.43809  | -7.12335  |
| C | -0.28227 | 0.95963  | -5.75648  |
| C | -0.89625 | -0.24783 | -5.74944  |
| C | -1.88145 | 0.99414  | -8.93715  |
| C | -1.58585 | 0.83552  | -10.23678 |
| C | -0.28304 | 0.17231  | -10.35811 |
| C | 0.20596  | -0.06846 | -9.13155  |
| H | 0.19373  | -0.07617 | -11.29793 |
| H | -2.19876 | 1.14177  | -11.07516 |
| H | 0.07144  | 1.49840  | -4.88782  |
| H | -1.11911 | -0.84296 | -4.87416  |
| H | -1.71156 | -1.54982 | -7.42041  |
| H | 0.28167  | 2.36988  | -7.44320  |
| H | -2.76710 | 1.44715  | -8.51216  |
| H | 1.14366  | -0.54367 | -8.87639  |

*$\omega$ B97X[D], quintuplet*

6-31+G(d,p)

Electronic energy: -347.4171856

Hartree

|   |          |          |           |
|---|----------|----------|-----------|
| C | -1.21397 | -0.63671 | -7.05471  |
| C | -0.76286 | 0.43109  | -8.05126  |
| C | -0.16130 | 1.43334  | -7.06626  |
| C | -0.27682 | 0.95853  | -5.69666  |
| C | -0.89214 | -0.25151 | -5.68988  |
| C | -1.86953 | 0.98876  | -8.94635  |
| C | -1.54597 | 0.81385  | -10.35323 |
| C | -0.34031 | 0.20007  | -10.46514 |
| C | 0.19307  | -0.06125 | -9.13778  |
| H | 0.15962  | -0.06086 | -11.38984 |
| H | -2.17967 | 1.13002  | -11.17271 |
| H | 0.07830  | 1.49883  | -4.82771  |
| H | -1.11560 | -0.84898 | -4.81456  |
| H | -1.70794 | -1.55330 | -7.35586  |
| H | 0.28701  | 2.36973  | -7.37773  |
| H | -2.76876 | 1.44982  | -8.55440  |
| H | 1.14014  | -0.54004 | -8.91723  |

Aug-cc-pVTZ

Electronic energy: -347.5080931

Hartree

|   |          |          |           |
|---|----------|----------|-----------|
| C | -1.21379 | -0.63176 | -7.05707  |
| C | -0.76396 | 0.43181  | -8.05117  |
| C | -0.16518 | 1.43032  | -7.06836  |
| C | -0.27738 | 0.95444  | -5.70525  |
| C | -0.88929 | -0.24891 | -5.69865  |
| C | -1.86565 | 0.98703  | -8.94528  |
| C | -1.54140 | 0.81131  | -10.34570 |
| C | -0.34232 | 0.20089  | -10.45582 |
| C | 0.18909  | -0.05898 | -9.13401  |
| H | 0.15499  | -0.05899 | -11.37751 |
| H | -2.17107 | 1.12513  | -11.16386 |
| H | 0.07783  | 1.49031  | -4.83863  |
| H | -1.10920 | -0.84401 | -4.82580  |
| H | -1.70889 | -1.54361 | -7.35544  |
| H | 0.27870  | 2.36491  | -7.37682  |
| H | -2.76195 | 1.44708  | -8.55715  |
| H | 1.13273  | -0.53557 | -8.91480  |

6-311++G(d,p)

Electronic energy: -347.4764895

Hartree

|   |          |          |           |
|---|----------|----------|-----------|
| C | -1.21403 | -0.63548 | -7.05654  |
| C | -0.76310 | 0.43134  | -8.05124  |
| C | -0.16231 | 1.43269  | -7.06792  |
| C | -0.27755 | 0.95680  | -5.70102  |
| C | -0.89126 | -0.25006 | -5.69436  |
| C | -1.86848 | 0.98841  | -8.94489  |
| C | -1.54396 | 0.81266  | -10.34917 |
| C | -0.34145 | 0.20049  | -10.46049 |
| C | 0.19226  | -0.06066 | -9.13566  |
| H | 0.15697  | -0.05988 | -11.38462 |
| H | -2.17595 | 1.12775  | -11.16865 |
| H | 0.07718  | 1.49516  | -4.83236  |
| H | -1.11343 | -0.84619 | -4.81942  |
| H | -1.70809 | -1.55066 | -7.35692  |
| H | 0.28485  | 2.36838  | -7.37846  |
| H | -2.76667 | 1.44927  | -8.55404  |
| H | 1.13830  | -0.53862 | -8.91556  |

**MP2, closed-shell singlet**

6-31+G(d,p)

Electronic energy: -345.41027331

Hartree

|   |           |           |            |
|---|-----------|-----------|------------|
| C | -1.226212 | -0.651117 | -7.103591  |
| C | -0.763337 | 0.430669  | -8.051253  |
| C | -0.157306 | 1.450979  | -7.116227  |
| C | -0.261893 | 1.012642  | -5.836820  |
| C | -0.927421 | -0.296178 | -5.828953  |
| C | -1.882177 | 0.994518  | -8.895559  |
| C | -1.584068 | 0.835036  | -10.209201 |
| C | -0.279963 | 0.171180  | -10.330039 |
| C | 0.212348  | -0.071702 | -9.089637  |
| H | 0.203328  | -0.080186 | -11.264404 |
| H | -2.201696 | 1.144093  | -11.041555 |
| H | 0.086194  | 1.536245  | -4.956782  |
| H | -1.141170 | -0.877471 | -4.942272  |
| H | -1.716902 | -1.553744 | -7.440364  |
| H | 0.281334  | 2.375959  | -7.463986  |
| H | -2.766664 | 1.446838  | -8.468925  |
| H | 1.148886  | -0.546375 | -8.831739  |

Aug-cc-pVTZ

Electronic energy: -345.50130945

Hartree

|   |           |           |            |
|---|-----------|-----------|------------|
| C | -1.224939 | -0.648381 | -7.104979  |
| C | -0.763320 | 0.430673  | -8.051255  |
| C | -0.158769 | 1.448335  | -7.117574  |
| C | -0.263121 | 1.011322  | -5.842692  |
| C | -0.927107 | -0.294465 | -5.834848  |
| C | -1.879383 | 0.993110  | -8.894434  |
| C | -1.582115 | 0.834067  | -10.203453 |
| C | -0.281031 | 0.171748  | -10.324020 |
| C | 0.209782  | -0.070380 | -9.088031  |
| H | 0.202870  | -0.079933 | -11.256828 |
| H | -2.200129 | 1.143320  | -11.034150 |
| H | 0.085085  | 1.535483  | -4.964258  |
| H | -1.141245 | -0.876204 | -4.949771  |
| H | -1.715227 | -1.550301 | -7.441318  |
| H | 0.279541  | 2.372581  | -7.464879  |
| H | -2.763182 | 1.445083  | -8.468303  |
| H | 1.145570  | -0.544672 | -8.830516  |

6-311++G(d,p)

Electronic energy: -345.46373335

Hartree

|   |           |           |            |
|---|-----------|-----------|------------|
| C | -1.226954 | -0.652728 | -7.102725  |
| C | -0.763340 | 0.430674  | -8.051254  |
| C | -0.156437 | 1.452541  | -7.115379  |
| C | -0.260937 | 1.014146  | -5.834780  |
| C | -0.928061 | -0.297814 | -5.826894  |
| C | -1.883825 | 0.995352  | -8.896272  |
| C | -1.585789 | 0.835895  | -10.211107 |
| C | -0.278554 | 0.170445  | -10.332232 |
| C | 0.213863  | -0.072478 | -9.090637  |
| H | 0.206792  | -0.081988 | -11.269350 |
| H | -2.205857 | 1.146178  | -11.045800 |
| H | 0.088494  | 1.539921  | -4.952210  |
| H | -1.142760 | -0.881450 | -4.937655  |
| H | -1.719099 | -1.557753 | -7.442029  |
| H | 0.283270  | 2.380085  | -7.465698  |
| H | -2.770590 | 1.448851  | -8.466866  |
| H | 1.153065  | -0.548492 | -8.830419  |

**CASSCF (8,8) / 6-31G\***

|   |          |          |          |
|---|----------|----------|----------|
| C | -0.96387 | -0.61978 | 1.00025  |
| C | 0.00000  | -0.00000 | 0.00000  |
| C | -0.96387 | 0.61978  | -1.00025 |
| C | -2.23729 | 0.38958  | -0.62874 |
| C | -2.23729 | -0.38958 | 0.62874  |
| C | 0.96387  | -1.00025 | -0.61978 |
| C | 2.23729  | -0.62873 | -0.38958 |
| C | 2.23729  | 0.62874  | 0.38958  |
| C | 0.96386  | 1.00025  | 0.61978  |
| H | 3.12010  | 1.14815  | 0.71142  |
| H | 3.12010  | -1.14814 | -0.71142 |
| H | -3.12010 | 0.71142  | -1.14815 |
| H | -3.12010 | -0.71142 | 1.14815  |
| H | -0.63093 | -1.15720 | 1.86758  |
| H | -0.63093 | 1.15720  | -1.86757 |
| H | 0.63093  | -1.86758 | -1.15720 |
| H | 0.63092  | 1.86757  | 1.15720  |



**Cartesian coordinates of optimised geometries of molecules 1-6 and their corresponding monoanions and monocations at CCSD / 6-31G\* level.**

**Molecule 1**

|                               |                                   |                                  |
|-------------------------------|-----------------------------------|----------------------------------|
| 1 neutral close-shell singlet | 1 <sup>+</sup> monocation doublet | 1 <sup>-</sup> monoanion doublet |
| C -0.95577 0.83472 -0.83471   | C 2.22320 -0.72618 0.00000        | C -2.30752 -0.65576 0.00007      |
| C 0.00000 -0.00000 0.00000    | C 0.93564 1.18239 -0.00000        | C -0.89588 1.15974 -0.00012      |
| C -0.95577 -0.83472 0.83471   | C 0.00387 -0.00000 0.00000        | C -0.00334 -0.08022 0.00001      |
| C -2.22886 -0.52308 0.52307   | C 0.93564 -1.18239 0.00000        | C -1.06202 -1.17407 0.00012      |
| C -2.22886 0.52308 -0.52307   | C -0.92602 0.00000 1.17004        | C 0.96403 -0.12688 -1.18727      |
| C 0.95577 0.83471 0.83472     | C -0.92602 -0.00000 -1.17004      | C 0.96403 -0.12664 1.18730       |
| C 2.22886 0.52307 0.52308     | C -2.23397 -0.00000 -0.71441      | C 2.27142 0.04855 0.70650        |
| C 2.22886 -0.52307 -0.52308   | H 3.11567 -1.34570 0.00000        | H -3.24856 -1.20712 0.00012      |
| C 0.95577 -0.83471 -0.83472   | H 0.59394 2.21318 -0.00000        | H -0.47108 2.16169 -0.00022      |
| H 3.12387 -0.95946 -0.95947   | H -0.59157 0.00001 2.20406        | H 0.61941 0.03753 -2.20856       |
| H 3.12386 0.95946 0.95947     | H -3.12274 -0.00000 -1.33946      | H 3.16482 0.09488 1.33277        |
| H -3.12387 -0.95947 0.95945   | H -0.59157 -0.00001 -2.20407      | H 0.61940 0.03798 2.20855        |
| H -3.12386 0.95947 -0.95945   | H 0.59394 -2.21318 0.00001        | H -0.78855 -2.22721 0.00022      |
| H -0.61121 1.56327 -1.56325   | C 2.22320 0.72618 -0.00000        | C -2.20259 0.82444 -0.00008      |
| H -0.61121 -1.56327 1.56325   | H 3.11567 1.34570 -0.00001        | H -3.05743 1.50234 -0.00015      |
| H 0.61121 1.56325 1.56327     | C -2.23397 0.00000 0.71441        | C 2.27142 0.04840 -0.70651       |
| H 0.61121 -1.56325 -1.56327   | H -3.12274 0.00000 1.33946        | H 3.16482 0.09461 -1.33278       |

**Molecule 2**

|                              |                                   |                                  |
|------------------------------|-----------------------------------|----------------------------------|
| 2 neutral close-singlet      | 2 <sup>+</sup> monocation doublet | 2 <sup>-</sup> monoanion doublet |
| C 1.32788 0.65715 -0.06838   | C -1.63086 0.48893 0.00004        | C 1.32520 0.13609 -0.72847       |
| C 1.32788 -0.65715 0.06838   | C -1.27392 -0.81961 -0.00002      | C 1.32520 0.13613 0.72846        |
| C -0.00000 0.00000 0.00000   | C -0.29196 0.15138 -0.00003       | C 0.05377 0.06004 -0.00000       |
| H 1.92452 -1.55746 0.16208   | H -1.55628 -1.86626 -0.00004      | H 1.69934 -0.66400 1.39101       |
| H 1.92452 1.55747 -0.16205   | H -2.40789 1.24476 0.00011        | H 1.69934 -0.66407 -1.39097      |
| C -1.32788 0.06838 0.65715   | C 2.02282 -0.42823 0.00004        | C -1.37172 0.61826 -0.00002      |
| C -1.32788 -0.06838 -0.65715 | C 1.09367 0.52728 -0.00004        | C -1.24954 -0.69562 0.00002      |
| H -1.92452 -0.16207 -1.55746 | H 1.33988 1.59159 -0.00008        | H -1.80307 -1.63759 0.00004      |
| H -1.92452 0.16207 1.55746   | H 3.10583 -0.48859 0.00009        | H -2.09312 1.43634 -0.00003      |

**Molecule 3**

|                             |                                   |                                  |
|-----------------------------|-----------------------------------|----------------------------------|
| 3 neutral close-singlet     | 3 <sup>+</sup> monocation doublet | 3 <sup>-</sup> monoanion doublet |
| C 0.00000 2.32136 1.30424   | C -2.79928 1.28436 -0.00000       | C 3.23158 -0.68678 -0.01492      |
| C 1.13255 1.43376 1.07759   | C -1.46653 1.74875 -0.00000       | C 2.10150 -1.57095 0.00558       |
| C 1.19056 0.43975 0.16882   | C -0.29585 1.02161 -0.00000       | C 0.76180 -1.30270 0.02766       |
| C -0.86845 2.74347 0.34948  | C -3.26882 -0.03152 -0.00000      | C 3.23158 0.68679 -0.01482       |
| C -0.81457 2.36756 -1.05688 | C -2.52688 -1.24007 0.00000       | C 2.10150 1.57095 0.00581        |
| C -0.36326 1.19275 -1.54394 | C -1.16879 -1.41117 0.00000       | C 0.76180 1.30270 0.02785        |
| C 0.00000 -0.00000 -0.67686 | C -0.01379 -0.44893 0.00000       | C -0.00082 -0.00000 0.02060      |
| C 0.36326 -1.19275 -1.54394 | C 0.82066 -0.77092 -1.25487       | C -0.74701 0.00010 -1.28991      |
| C -1.19056 -0.43975 0.16882 | C 0.82066 -0.77092 1.25487        | C -0.78641 -0.00010 1.31132      |
| C 0.81457 -2.36756 -1.05688 | C 2.04182 -0.27062 -1.52757       | C -2.07287 0.00012 -1.58255      |
| C -1.13255 -1.43376 1.07759 | C 2.04182 -0.27062 1.52757        | C -2.11640 -0.00012 1.56672      |
| C 0.86845 -2.74347 0.34948  | C 2.88265 0.56676 -0.67774        | C -3.22443 0.00005 -0.70628      |
| C -0.00000 -2.32136 1.30424 | C 2.88265 0.56676 0.67774         | C -3.24236 -0.00005 0.64989      |
| H 0.27588 -1.07181 -2.62521 | H 0.34530 -1.42664 -1.98438       | H -0.04999 0.00016 -2.13041      |
| H 1.14014 -3.12694 -1.77045 | H 2.46805 -0.53503 -2.49616       | H -2.31853 0.00020 -2.64960      |
| H 1.60654 -3.49790 0.62604  | H 3.63681 1.16305 -1.19032        | H -4.19380 0.00009 -1.21283      |
| H 0.08548 -2.75985 2.29979  | H 3.63680 1.16305 1.19032         | H -4.22551 -0.00008 1.13004      |
| H -2.01736 -1.62047 1.68923 | H 2.46805 -0.53503 2.49616        | H -2.39585 -0.00020 2.62506      |
| H -2.12781 0.09385 0.01522  | H 0.34530 -1.42664 1.98438        | H -0.11369 -0.00016 2.17217      |
| H -0.27588 1.07181 -2.62521 | H -0.82605 -2.44820 0.00000       | H 0.08152 2.15678 0.04151        |
| H -1.14014 3.12694 -1.77045 | H -3.12381 -2.15121 0.00000       | H 2.36010 2.63545 0.00222        |
| H -1.60654 3.49790 0.62604  | H -4.35275 -0.14482 -0.00000      | H 4.20871 1.17810 -0.03134       |
| H -0.08548 2.75985 2.29979  | H -3.56779 2.05728 -0.00000       | H 4.20871 -1.17809 -0.03151      |
| H 2.01736 1.62047 1.68923   | H -1.35110 2.83210 -0.00000       | H 2.36010 -2.63545 0.00182       |
| H 2.12781 -0.09385 0.01522  | H 0.61929 1.61119 -0.00000        | H 0.08152 -2.15678 0.04118       |

## Molecule 4

### 4 neutral close-shell

C -1.279857 0.026239 -0.286704  
C -0.715307 0.392995 1.027055  
C 0.626595 0.256334 0.985077  
C 1.039805 -0.218461 -0.385826  
C -0.275928 -0.329985 -1.115180  
H -2.339302 0.046358 -0.529030  
H -1.303729 0.719112 1.880846  
H 1.325257 0.449915 1.794034  
H 1.722821 0.491510 -0.877531  
H 1.568966 -1.183126 -0.343916  
H -0.369068 -0.650794 -2.148824

### 4 monocation doublet

C -1.295559 0.040745 -0.246256  
C -0.756666 0.390810 1.007733  
C 0.636712 0.248302 0.962901  
C 1.057770 -0.222410 -0.392471  
C -0.252194 -0.329132 -1.105560  
H -2.349971 0.054519 -0.507477  
H -1.327424 0.718767 1.871961  
H 1.318181 0.448075 1.786487  
H 1.745794 0.483478 -0.885201  
H 1.592227 -1.185354 -0.353333  
H -0.368675 -0.647708 -2.138780

### 4 monoanion doublet

C -0.210529 -0.680517 1.057034  
C 0.242050 0.659119 1.064414  
C 0.263760 1.164442 -0.247806  
C -0.041940 0.021253 -1.200688  
C -0.495332 -1.082471 -0.260185  
H -0.393550 -1.281758 1.951329  
H 0.458156 1.239292 1.965219  
H 0.770372 2.079427 -0.563817  
H -0.797103 0.280681 -1.982070  
H 0.860708 -0.280348 -1.808168  
H -0.646342 -2.114050 -0.586922

## Molecule 5

### 2 neutral close-shell

C -0.599571 0.650176 0.040971  
C -0.599571 -0.650176 0.040969  
C 0.759442 -0.000000 -0.051991  
H -1.139068 1.585372 0.077875  
H -1.139069 -1.585372 0.077872  
H 1.296537 0.000001 -1.004981  
H 1.421302 -0.000001 0.818988

### 2 monocation doublet

C -0.218348 -0.433790 0.150288  
C -1.137754 0.531551 -0.157453  
C 1.122638 -0.088494 0.058811  
H -0.533837 -1.431267 0.454180  
H -1.131138 1.572636 -0.478223  
H 1.907432 -0.809655 0.289805  
H 1.436684 0.910144 -0.245455

### 2 monoanion doublet

C 0.112352 0.701040 -0.406050  
C -0.113098 -0.708116 -0.385923  
C 0.013715 0.013324 0.942394  
H 1.022370 1.212565 -0.764354  
H -1.030318 -1.228262 -0.711994  
H 0.885363 -0.246886 1.574472  
H -0.844504 0.289604 1.585925

## Molecule 6

### 6 neutral close-shell

C 0.692411 1.171988 -0.917403  
C 1.048398 -0.093941 -1.259616  
C 0.881405 -1.282483 -0.426632  
C -0.135754 -1.476096 0.436952  
C -1.288512 -0.506077 0.531760  
C -0.780006 0.814937 1.056278  
C 0.078084 1.574217 0.345608  
H 0.971925 1.976956 -1.599292  
H 1.592501 -0.229880 -2.195857  
H 1.654279 -2.047889 -0.514616  
H -0.141258 -2.359937 1.075462  
H -1.722491 -0.357535 -0.469180  
H -2.078652 -0.903199 1.178867  
H -1.131937 1.163029 2.027811  
H 0.359632 2.556022 0.729940

### 6 monocation doublet

C 0.982887 1.226007 -0.739931  
C 1.348789 -0.075158 -1.091676  
C 0.779829 -1.311278 -0.686201  
C -0.279167 -1.522885 0.159184  
C -1.146404 -0.565819 0.900552  
C -0.963234 0.909692 0.816784  
C -0.057870 1.667626 0.119088  
H 1.583171 2.016512 -1.190026  
H 2.193157 -0.152632 -1.776412  
H 1.249558 -2.200448 -1.103847  
H -0.548594 -2.565982 0.331326  
H -2.198596 -0.789852 0.634747  
H -1.119609 -0.847888 1.971845  
H -1.682144 1.464979 1.421019  
H -0.141780 2.747222 0.233660

### 6 monoanion doublet

C 1.509330 0.702978 -0.069542  
C 1.509330 -0.702978 -0.069542  
C 0.397344 -1.572013 0.074398  
C -0.955626 -1.303731 0.126284  
C -1.650878 -0.000000 -0.201790  
C -0.955626 1.303731 0.126284  
C 0.397344 1.572013 0.074398  
H 2.487401 1.190567 -0.138978  
H 2.487401 -1.190567 -0.138978  
H 0.661036 -2.632729 0.185283  
H -1.627072 -2.159223 0.254842  
H -1.920736 -0.000000 -1.281496  
H -2.629303 -0.000000 0.316249  
H -1.627072 2.159223 0.254842  
H 0.661036 2.632729 0.185283

Comparison of the geometrical parameters of molecule **1**, computed at different levels of theory, and corresponding linear regression parameters and RMSDs, compared to experimental data.

*Bond length*

| Atom I    | Atom J | B3LYP       |               |             | B3LYP[GD3BJ] |               |             | BLYP        |               |             | BP86        |               |             | CAMB3LYP    |               |             | CAMB3LYP[GD3BJ] |               |             |
|-----------|--------|-------------|---------------|-------------|--------------|---------------|-------------|-------------|---------------|-------------|-------------|---------------|-------------|-------------|---------------|-------------|-----------------|---------------|-------------|
|           |        | 6-31+G(d,p) | 6-311++G(d,p) | aug-cc-pVTZ | 6-31+G(d,p)  | 6-311++G(d,p) | aug-cc-pVTZ | 6-31+G(d,p) | 6-311++G(d,p) | aug-cc-pVTZ | 6-31+G(d,p) | 6-311++G(d,p) | aug-cc-pVTZ | 6-31+G(d,p) | 6-311++G(d,p) | aug-cc-pVTZ | 6-31+G(d,p)     | 6-311++G(d,p) | aug-cc-pVTZ |
| 1         | 2      | 1.5231      | 1.5218        | 1.5185      | 1.5211       | 1.5198        | 1.5166      | 1.5349      | 1.5334        | 1.5298      | 1.5272      | 1.5254        | 1.5223      | 1.5164      | 1.5151        | 1.5118      | 1.5159          | 1.5146        | 1.5114      |
| 1         | 5      | 1.3484      | 1.3439        | 1.3399      | 1.3482       | 1.3436        | 1.3397      | 1.3604      | 1.3554        | 1.3511      | 1.3599      | 1.3553        | 1.3513      | 1.3412      | 1.3366        | 1.3327      | 1.3411          | 1.3365        | 1.3326      |
| 2         | 3      | 1.5231      | 1.5218        | 1.5185      | 1.5211       | 1.5198        | 1.5166      | 1.5349      | 1.5334        | 1.5298      | 1.5271      | 1.5254        | 1.5223      | 1.5164      | 1.5151        | 1.5118      | 1.5159          | 1.5146        | 1.5114      |
| 2         | 6      | 1.5231      | 1.5218        | 1.5185      | 1.5211       | 1.5198        | 1.5166      | 1.5349      | 1.5334        | 1.5298      | 1.5272      | 1.5254        | 1.5223      | 1.5164      | 1.5151        | 1.5118      | 1.5159          | 1.5146        | 1.5114      |
| 2         | 9      | 1.5231      | 1.5218        | 1.5185      | 1.5211       | 1.5198        | 1.5166      | 1.5349      | 1.5334        | 1.5298      | 1.5272      | 1.5254        | 1.5223      | 1.5164      | 1.5151        | 1.5118      | 1.5159          | 1.5146        | 1.5114      |
| 3         | 4      | 1.3484      | 1.3439        | 1.3399      | 1.3482       | 1.3436        | 1.3397      | 1.3604      | 1.3554        | 1.3511      | 1.3599      | 1.3553        | 1.3513      | 1.3412      | 1.3366        | 1.3327      | 1.3411          | 1.3365        | 1.3326      |
| 4         | 5      | 1.4734      | 1.4724        | 1.4692      | 1.4737       | 1.4727        | 1.4696      | 1.4800      | 1.4787        | 1.4753      | 1.4751      | 1.4736        | 1.4707      | 1.4722      | 1.4713        | 1.4682      | 1.4724          | 1.4716        | 1.4686      |
| 6         | 7      | 1.3484      | 1.3439        | 1.3399      | 1.3482       | 1.3436        | 1.3397      | 1.3604      | 1.3554        | 1.3511      | 1.3599      | 1.3553        | 1.3513      | 1.3412      | 1.3366        | 1.3327      | 1.3411          | 1.3365        | 1.3326      |
| 7         | 8      | 1.4734      | 1.4724        | 1.4692      | 1.4737       | 1.4727        | 1.4696      | 1.4800      | 1.4787        | 1.4753      | 1.4751      | 1.4736        | 1.4707      | 1.4722      | 1.4713        | 1.4682      | 1.4724          | 1.4716        | 1.4686      |
| 8         | 9      | 1.3484      | 1.3439        | 1.3399      | 1.3482       | 1.3436        | 1.3397      | 1.3604      | 1.3554        | 1.3511      | 1.3599      | 1.3553        | 1.3513      | 1.3412      | 1.3366        | 1.3327      | 1.3411          | 1.3365        | 1.3326      |
| INTERCEPT |        | 0,0385      | 0,0084        | -0,0012     | 0,0192       | 0,0493        | 0,0089      | 0,0260      | 0,0586        | 0,0159      | 0,0846      | 0,1110        | 0,0723      | -0,0107     | 0,0204        | -0,0196     | -0,0083         | 0,0226        | -0,0179     |
| SLOPE     |        | 0,9789      | 0,9981        | 1,0023      | 0,9900       | 0,9708        | 0,9948      | 0,9931      | 0,9724        | 0,9975      | 0,9493      | 0,9329        | 0,9555      | 1,0073      | 0,9875        | 1,0111      | 1,0056          | 0,9858        | 1,0098      |
| CORREL    |        | 0,9997      | 0,9998        | 0,9998      | 0,9998       | 0,9998        | 0,9999      | 0,9991      | 0,9988        | 0,9992      | 0,9992      | 0,9990        | 0,9993      | 0,9997      | 0,9998        | 0,9997      | 0,9997          | 0,9998        | 0,9997      |
| RMSD      |        | 0,0086      | 0,0059        | 0,0027      | 0,0051       | 0,0079        | 0,0020      | 0,0165      | 0,0195        | 0,0128      | 0,0130      | 0,0161        | 0,0097      | 0,0019      | 0,0030        | 0,0042      | 0,0021          | 0,0030        | 0,0044      |

*Bond length (continuation)*

| Atom I    | Atom J | M06-2X      |               |             | PBE0        |               |             | PBE0[GD3BJ] |               |             | PBE         |               |             | PW91        |               |             | wB97        |               |             |
|-----------|--------|-------------|---------------|-------------|-------------|---------------|-------------|-------------|---------------|-------------|-------------|---------------|-------------|-------------|---------------|-------------|-------------|---------------|-------------|
|           |        | 6-31+G(d,p) | 6-311++G(d,p) | aug-cc-pVTZ |
| 1         | 2      | 1.5159      | 1.5150        | 1.5123      | 1.5137      | 1.5120        | 1.5096      | 1.5130      | 1.5114        | 1.5090      | 1.5236      | 1.5217        | 1.5190      | 1.5231      | 1.5211        | 1.5183      | 1.5163      | 1.5147        | 1.5118      |
| 1         | 5      | 1.3434      | 1.3398        | 1.3360      | 1.3459      | 1.3420        | 1.3385      | 1.3458      | 1.3419        | 1.3385      | 1.3587      | 1.3543        | 1.3507      | 1.3575      | 1.3528        | 1.3490      | 1.3431      | 1.3390        | 1.3350      |
| 2         | 3      | 1.5159      | 1.5150        | 1.5123      | 1.5137      | 1.5120        | 1.5096      | 1.5130      | 1.5114        | 1.5090      | 1.5236      | 1.5217        | 1.5190      | 1.5231      | 1.5211        | 1.5183      | 1.5163      | 1.5147        | 1.5118      |
| 2         | 6      | 1.5159      | 1.5150        | 1.5123      | 1.5137      | 1.5120        | 1.5096      | 1.5130      | 1.5114        | 1.5090      | 1.5236      | 1.5217        | 1.5190      | 1.5231      | 1.5211        | 1.5183      | 1.5164      | 1.5148        | 1.5118      |
| 2         | 9      | 1.5159      | 1.5150        | 1.5123      | 1.5137      | 1.5120        | 1.5096      | 1.5130      | 1.5114        | 1.5090      | 1.5236      | 1.5217        | 1.5190      | 1.5231      | 1.5211        | 1.5183      | 1.5163      | 1.5147        | 1.5118      |
| 3         | 4      | 1.3434      | 1.3398        | 1.3360      | 1.3459      | 1.3420        | 1.3385      | 1.3458      | 1.3419        | 1.3385      | 1.3587      | 1.3543        | 1.3507      | 1.3575      | 1.3528        | 1.3490      | 1.3431      | 1.3390        | 1.3350      |
| 4         | 5      | 1.4748      | 1.4745        | 1.4719      | 1.4675      | 1.4664        | 1.4641      | 1.4678      | 1.4667        | 1.4644      | 1.4723      | 1.4707        | 1.4682      | 1.4715      | 1.4699        | 1.4672      | 1.4724      | 1.4714        | 1.4684      |
| 6         | 7      | 1.3434      | 1.3398        | 1.3360      | 1.3459      | 1.3420        | 1.3385      | 1.3458      | 1.3419        | 1.3385      | 1.3587      | 1.3543        | 1.3507      | 1.3575      | 1.3528        | 1.3490      | 1.3431      | 1.3390        | 1.3350      |
| 7         | 8      | 1.4748      | 1.4745        | 1.4719      | 1.4675      | 1.4664        | 1.4641      | 1.4678      | 1.4667        | 1.4644      | 1.4723      | 1.4707        | 1.4682      | 1.4715      | 1.4699        | 1.4672      | 1.4724      | 1.4714        | 1.4684      |
| 8         | 9      | 1.3434      | 1.3398        | 1.3360      | 1.3459      | 1.3420        | 1.3385      | 1.3458      | 1.3419        | 1.3385      | 1.3587      | 1.3543        | 1.3507      | 1.3575      | 1.3528        | 1.3490      | 1.3431      | 1.3390        | 1.3350      |
| INTERCEPT |        | 0.0398      | 0.0143        | 0.0017      | 0.0857      | 0.0638        | 0.0515      | 0.0891      | 0.0665        | 0.0551      | 0.1278      | 0.1034        | 0.0925      | 0.1215      | 0.0951        | 0.0833      | 0.0374      | 0.0129        | 0.0006      |
| SLOPE     |        | 0.9747      | 0.9913        | 0.9978      | 0.9418      | 0.9554        | 0.9620      | 0.9393      | 0.9534        | 0.9594      | 0.9195      | 0.9345        | 0.9401      | 0.9233      | 0.9396        | 0.9456      | 0.9761      | 0.9915        | 0.9977      |
| CORREL    |        | 0.9996      | 0.9995        | 0.9995      | 0.9998      | 0.9998        | 0.9999      | 0.9998      | 0.9999        | 0.9999      | 0.9990      | 0.9992        | 0.9993      | 0.9990      | 0.9992        | 0.9993      | 0.9998      | 0.9998        | 0.9997      |
| RMSD      |        | 0.0046      | 0.0032        | 0.0030      | 0.0055      | 0.0039        | 0.0045      | 0.0055      | 0.0040        | 0.0048      | 0.0143      | 0.0113        | 0.0086      | 0.0135      | 0.0102        | 0.0075      | 0.0040      | 0.0020        | 0.0033      |

*Bond length (continuation)*

| Atom I    | Atom J | HF          |               |             | MP2         |               |             | CCSD     | CASSCF (8,8) | X-Ray<br>[from<br>Haselbach et al] |
|-----------|--------|-------------|---------------|-------------|-------------|---------------|-------------|----------|--------------|------------------------------------|
|           |        | 6-31+G(d,p) | 6-311++G(d,p) | aug-cc-pVTZ | 6-31+G(d,p) | 6-311++G(d,p) | aug-cc-pVTZ | 6-31G(d) | 6-31G(d)     |                                    |
| 1         | 2      | 1.5212      | 1.5206        | 1.5180      | 1.5108      | 1.5127        | 1.5076      | 1.5189   | 1.5211       | 1.5137                             |
| 1         | 5      | 1.3579      | 1.3542        | 1.3480      | 1.3565      | 1.3576        | 1.3517      | 1.3472   | 1.3463       | 1.3391                             |
| 2         | 3      | 1.5212      | 1.5206        | 1.5180      | 1.5108      | 1.5127        | 1.5076      | 1.5189   | 1.5211       | 1.5157                             |
| 2         | 6      | 1.5212      | 1.5206        | 1.5180      | 1.5108      | 1.5127        | 1.5076      | 1.5189   | 1.5211       | 1.5150                             |
| 2         | 9      | 1.5212      | 1.5206        | 1.5180      | 1.5108      | 1.5127        | 1.5076      | 1.5189   | 1.5211       | 1.5176                             |
| 3         | 4      | 1.3579      | 1.3542        | 1.3480      | 1.3565      | 1.3576        | 1.3517      | 1.3472   | 1.3463       | 1.3355                             |
| 4         | 5      | 1.4554      | 1.4568        | 1.4559      | 1.4683      | 1.4719        | 1.4649      | 1.4795   | 1.4793       | 1.4693                             |
| 6         | 7      | 1.3579      | 1.3542        | 1.3480      | 1.3565      | 1.3576        | 1.3517      | 1.3472   | 1.3463       | 1.3396                             |
| 7         | 8      | 1.4554      | 1.4568        | 1.4559      | 1.4683      | 1.4719        | 1.4649      | 1.4795   | 1.4793       | 1.4684                             |
| 8         | 9      | 1.3579      | 1.3542        | 1.3480      | 1.3565      | 1.3576        | 1.3517      | 1.3472   | 1.3463       | 1.3370                             |
| INTERCEPT |        | 0.1580      | 0.1274        | 0.0907      | 0.1978      | 0.1904        | 0.1806      | 0.0478   | 0.0256       |                                    |
| SLOPE     |        | 0.8952      | 0.9156        | 0.9385      | 0.8660      | 0.8725        | 0.8753      | 0.9718   | 0.9876       |                                    |
| CORREL    |        | 0.9923      | 0.9943        | 0.9959      | 0.9998      | 0.9999        | 0.9998      | 0.9995   | 0.9997       |                                    |
| RMSD      |        | 0.0146      | 0.0122        | 0.0089      | 0.0123      | 0.0128        | 0.0104      | 0.0080   | 0.0081       |                                    |

**Bond angles**

| Atom I    | Atom J | Atom K | B3LYP       |               |             | B3LYP[GD3BJ] |               |             | BLYP        |               |             | BP86        |               |             | CAMB3LYP    |               |             | CAMB3LYP[GD3BJ] |               |             |
|-----------|--------|--------|-------------|---------------|-------------|--------------|---------------|-------------|-------------|---------------|-------------|-------------|---------------|-------------|-------------|---------------|-------------|-----------------|---------------|-------------|
|           |        |        | 6-31+G(d,p) | 6-311++G(d,p) | aug-cc-pVTZ | 6-31+G(d,p)  | 6-311++G(d,p) | aug-cc-pVTZ | 6-31+G(d,p) | 6-311++G(d,p) | aug-cc-pVTZ | 6-31+G(d,p) | 6-311++G(d,p) | aug-cc-pVTZ | 6-31+G(d,p) | 6-311++G(d,p) | aug-cc-pVTZ | 6-31+G(d,p)     | 6-311++G(d,p) | aug-cc-pVTZ |
| 1         | 2      | 3      | 101.819     | 101.789       | 101.694     | 102.036      | 102.006       | 101.913     | 101.825     | 101.793       | 101.701     | 102.117     | 102.097       | 101.985     | 101.813     | 101.781       | 101.691     | 101.902         | 101.87        | 101.78      |
| 1         | 2      | 6      | 113.427     | 113.443       | 113.494     | 113.311      | 113.328       | 113.377     | 113.424     | 113.441       | 113.49      | 113.268     | 113.279       | 113.338     | 113.431     | 113.448       | 113.495     | 113.383         | 113.4         | 113.448     |
| 1         | 2      | 9      | 113.428     | 113.443       | 113.494     | 113.312      | 113.328       | 113.377     | 113.424     | 113.441       | 113.49      | 113.268     | 113.279       | 113.339     | 113.431     | 113.448       | 113.496     | 113.383         | 113.401       | 113.448     |
| 2         | 3      | 4      | 109.799     | 109.783       | 109.849     | 109.682      | 109.667       | 109.73      | 109.71      | 109.687       | 109.751     | 109.606     | 109.585       | 109.663     | 109.904     | 109.892       | 109.957     | 109.85          | 109.837       | 109.901     |
| 2         | 6      | 7      | 109.799     | 109.783       | 109.849     | 109.682      | 109.667       | 109.73      | 109.71      | 109.687       | 109.751     | 109.606     | 109.585       | 109.663     | 109.904     | 109.892       | 109.957     | 109.85          | 109.837       | 109.901     |
| 3         | 4      | 5      | 109.292     | 109.322       | 109.305     | 109.3        | 109.33        | 109.314     | 109.377     | 109.416       | 109.399     | 109.335     | 109.366       | 109.345     | 109.189     | 109.218       | 109.197     | 109.2           | 109.228       | 109.209     |
| 6         | 7      | 8      | 109.292     | 109.322       | 109.305     | 109.3        | 109.33        | 109.314     | 109.377     | 109.416       | 109.399     | 109.335     | 109.366       | 109.345     | 109.189     | 109.218       | 109.197     | 109.2           | 109.228       | 109.209     |
| 7         | 8      | 9      | 109.292     | 109.322       | 109.305     | 109.3        | 109.33        | 109.314     | 109.377     | 109.416       | 109.399     | 109.335     | 109.366       | 109.345     | 109.189     | 109.218       | 109.197     | 109.2           | 109.228       | 109.209     |
| INTERCEPT |        |        | 6.0765      | 5.7403        | 4.3760      | 9.1100       | 8.7641        | 7.4391      | 6.3748      | 6.0285        | 4.7097      | 10.3242     | 10.1208       | 8.5159      | 5.7350      | 5.3632        | 4.0671      | 7.0013          | 6.6233        | 5.3321      |
| SLOPE     |        |        | 0.9435      | 0.9466        | 0.9592      | 0.9156       | 0.9188        | 0.9310      | 0.9409      | 0.9441        | 0.9562      | 0.9044      | 0.9063        | 0.9211      | 0.9465      | 0.9500        | 0.9619      | 0.9348          | 0.9384        | 0.9502      |
| CORREL    |        |        | 0.9978      | 0.9975        | 0.9977      | 0.9975       | 0.9971        | 0.9975      | 0.9968      | 0.9963        | 0.9967      | 0.9968      | 0.9964        | 0.9970      | 0.9984      | 0.9983        | 0.9983      | 0.9984          | 0.9983        | 0.9983      |
| RMSD      |        |        | 0.3232      | 0.3240        | 0.2898      | 0.4069       | 0.4052        | 0.3639      | 0.3577      | 0.3652        | 0.3295      | 0.4528      | 0.4563        | 0.4027      | 0.2984      | 0.2928        | 0.2657      | 0.3299          | 0.3237        | 0.2913      |

*Bond angles (continuation)*

| Atom I    | Atom J | Atom K | M06-2X      |               |             | PBE0        |               |             | PBE0[GD3BJ] |               |             | PBE         |               |             | PW91        |               |             | wb97        |               |             |
|-----------|--------|--------|-------------|---------------|-------------|-------------|---------------|-------------|-------------|---------------|-------------|-------------|---------------|-------------|-------------|---------------|-------------|-------------|---------------|-------------|
|           |        |        | 6-31+G(d,p) | 6-311++G(d,p) | aug-cc-pVTZ |
| 1         | 2      | 3      | 102.062     | 102.037       | 101.929     | 102.102     | 102.084       | 101.971     | 102.205     | 102.187       | 102.075     | 102.187     | 102.172       | 102.063     | 102.16      | 102.144       | 102.029     | 101.952     | 101.935       | 101.825     |
| 1         | 2      | 6      | 113.3       | 113.314       | 113.373     | 113.276     | 113.286       | 113.346     | 113.221     | 113.231       | 113.291     | 113.231     | 113.239       | 113.296     | 113.245     | 113.254       | 113.314     | 113.348     | 113.354       | 113.412     |
| 1         | 2      | 9      | 113.297     | 113.308       | 113.366     | 113.277     | 113.286       | 113.347     | 113.222     | 113.232       | 113.291     | 113.231     | 113.239       | 113.297     | 113.245     | 113.254       | 113.316     | 113.359     | 113.369       | 113.426     |
| 2         | 3      | 4      | 109.795     | 109.791       | 109.863     | 109.712     | 109.703       | 109.783     | 109.65      | 109.642       | 109.72      | 109.587     | 109.567       | 109.645     | 109.594     | 109.571       | 109.652     | 109.82      | 109.808       | 109.88      |
| 2         | 6      | 7      | 109.795     | 109.791       | 109.863     | 109.712     | 109.703       | 109.783     | 109.65      | 109.642       | 109.72      | 109.587     | 109.567       | 109.645     | 109.594     | 109.571       | 109.652     | 109.818     | 109.806       | 109.879     |
| 3         | 4      | 5      | 109.174     | 109.191       | 109.173     | 109.238     | 109.255       | 109.232     | 109.247     | 109.265       | 109.243     | 109.319     | 109.347       | 109.323     | 109.326     | 109.357       | 109.333     | 109.205     | 109.226       | 109.208     |
| 6         | 7      | 8      | 109.174     | 109.191       | 109.172     | 109.238     | 109.255       | 109.232     | 109.247     | 109.265       | 109.243     | 109.319     | 109.347       | 109.323     | 109.326     | 109.357       | 109.333     | 109.206     | 109.226       | 109.208     |
| 7         | 8      | 9      | 109.174     | 109.19        | 109.172     | 109.238     | 109.255       | 109.232     | 109.247     | 109.265       | 109.243     | 109.319     | 109.347       | 109.323     | 109.326     | 109.357       | 109.333     | 109.204     | 109.225       | 109.208     |
| INTERCEPT |        |        | 9.1503      | 8.8533        | 7.3015      | 9.8690      | 9.6633        | 8.0356      | 11.3220     | 11.1128       | 9.5065      | 11.2526     | 11.1139       | 9.5476      | 10.8988     | 10.7497       | 9.0971      | 7.7307      | 7.5549        | 5.9957      |
| SLOPE     |        |        | 0.9150      | 0.9178        | 0.9320      | 0.9085      | 0.9104        | 0.9254      | 0.8951      | 0.8971        | 0.9118      | 0.8959      | 0.8972        | 0.9116      | 0.8991      | 0.9005        | 0.9157      | 0.9281      | 0.9298        | 0.9441      |
| CORREL    |        |        | 0.9985      | 0.9984        | 0.9985      | 0.9981      | 0.9979        | 0.9982      | 0.9978      | 0.9976        | 0.9980      | 0.9969      | 0.9965        | 0.9971      | 0.9968      | 0.9964        | 0.9970      | 0.9984      | 0.9983        | 0.9984      |
| RMSD      |        |        | 0.3868      | 0.3801        | 0.3360      | 0.4159      | 0.4131        | 0.3617      | 0.4626      | 0.4593        | 0.4061      | 0.4769      | 0.4804        | 0.4261      | 0.4677      | 0.4723        | 0.4157      | 0.3494      | 0.3472        | 0.3058      |

*Bond angles (continuation)*

| Atom I    | Atom J | Atom K | HF          |               |             | MP2         |               |             | CCSD    | CASSCF(8,8) | X-Ray<br>[from<br>Haselbach et al] |
|-----------|--------|--------|-------------|---------------|-------------|-------------|---------------|-------------|---------|-------------|------------------------------------|
|           |        |        | 6-31+G(d,p) | 6-311++G(d,p) | aug-cc-pVTZ | 6-31+G(d,p) | 6-311++G(d,p) | aug-cc-pVTZ | 6-31G*  | 6-31G*      |                                    |
| 1         | 2      | 3      | 101.277     | 101.277       | 101.185     | 102.607     | 102.64        | 102.545     | 102.009 | 101.356     | 101.714                            |
| 1         | 2      | 6      | 113.242     | 113.273       | 113.348     | 113.009     | 112.991       | 113.041     | 113.326 | 113.675     | 113.693                            |
| 1         | 2      | 9      | 114.194     | 114.164       | 114.186     | 113.009     | 112.991       | 113.042     | 113.326 | 113.675     | 114.175                            |
| 2         | 3      | 4      | 110.077     | 110.075       | 110.134     | 109.547     | 109.546       | 109.567     | 109.901 | 110.379     | 110.108                            |
| 2         | 6      | 7      | 110.077     | 110.075       | 110.134     | 109.547     | 109.546       | 109.567     | 109.901 | 110.379     | 109.920                            |
| 3         | 4      | 5      | 109.282     | 109.285       | 109.272     | 109.15      | 109.134       | 109.161     | 109.095 | 108.943     | 109.008                            |
| 6         | 7      | 8      | 109.282     | 109.285       | 109.272     | 109.15      | 109.134       | 109.161     | 109.095 | 108.943     | 109.243                            |
| 7         | 8      | 9      | 109.282     | 109.285       | 109.272     | 109.15      | 109.134       | 109.161     | 109.095 | 108.943     | 109.241                            |
| INTERCEPT |        |        | -1.7291     | -1.7108       | -3.0006     | 16.6407     | 17.0627       | 15.8128     | 8.2242  | -1.2208     |                                    |
| SLOPE     |        |        | 1.0153      | 1.0152        | 1.0270      | 0.8460      | 0.8421        | 0.8537      | 0.9234  | 1.0102      |                                    |
| CORREL    |        |        | 0.9978      | 0.9979        | 0.9980      | 0.9982      | 0.9983        | 0.9982      | 0.9987  | 0.9964      |                                    |
| RMSD      |        |        | 0.2497      | 0.2432        | 0.2542      | 0.6241      | 0.6371        | 0.5972      | 0.3600  | 0.3251      |                                    |



*Dihedral angles*

| Atom I    | Atom J | Atom K | Atom L | B3LYP       |               |             | B3LYP[GD3BJ] |               |             | BLYP        |               |             | BP86        |               |             | CAMB3LYP    |               |             | CAMB3LYP[GD3BJ] |               |             |        |
|-----------|--------|--------|--------|-------------|---------------|-------------|--------------|---------------|-------------|-------------|---------------|-------------|-------------|---------------|-------------|-------------|---------------|-------------|-----------------|---------------|-------------|--------|
|           |        |        |        | 6-31+G(d,p) | 6-311++G(d,p) | aug-cc-pVTZ | 6-31+G(d,p)  | 6-311++G(d,p) | aug-cc-pVTZ | 6-31+G(d,p) | 6-311++G(d,p) | aug-cc-pVTZ | 6-31+G(d,p) | 6-311++G(d,p) | aug-cc-pVTZ | 6-31+G(d,p) | 6-311++G(d,p) | aug-cc-pVTZ | 6-31+G(d,p)     | 6-311++G(d,p) | aug-cc-pVTZ |        |
| 1         | 2      | 3      | 4      | 0           | 0             | 0           | 0            | 0             | 0           | 0           | 0             | 0           | 0           | 0             | 0           | 0           | 0             | 0           | 0               | 0             | 0           |        |
| 1         | 2      | 6      | 7      | 122.233     | 122.241       | 122.267     | 122.172      | 122.181       | 122.206     | 122.231     | 122.24        | 122.265     | 122.149     | 122.155       | 122.186     | 122.235     | 122.243       | 122.268     | 122,21          | 122,219       | 122,244     |        |
| 2         | 3      | 4      | 5      | 0           | 0             | 0           | 0            | 0             | 0           | 0           | 0             | 0           | 0           | 0             | 0           | 0           | 0             | 0           | 0               | 0             | 0           |        |
| 2         | 6      | 7      | 8      | 0           | 0             | 0           | 0            | 0             | 0           | 0           | 0             | 0           | 0           | 0             | 0           | 0           | 0             | 0           | 0               | 0             | 0           |        |
| 6         | 7      | 8      | 9      | 0           | 0             | 0           | 0            | 0             | 0           | 0           | 0             | 0           | 0           | 0             | 0           | 0           | 0             | 0           | 0               | 0             | 0           |        |
| INTERCEPT |        |        |        | -0,3887     | -0,3887       | -0,3888     | -0.3885      | -0.3885       | -0.3886     | -0.3887     | -0.3887       | -0.3888     | -0.3884     | -0.3885       | -0.3886     | -0.3887     | -0.3887       | -0.3888     | -0.3886         | -0.3887       | -0.3887     |        |
| SLOPE     |        |        |        | 0,9907      | 0,9908        | 0,9910      | 0.9902       | 0.9903        | 0.9905      | 0.9907      | 0.9908        | 0.9910      | 0.9901      | 0.9901        | 0.9904      | 0.9908      | 0.9908        | 0.9910      | 0.9906          | 0.9906        | 0.9908      |        |
| CORREL    |        |        |        | 1,0000      | 1,0000        | 1,0000      | 1.0000       | 1.0000        | 1.0000      | 1.0000      | 1.0000        | 1.0000      | 1.0000      | 1.0000        | 1.0000      | 1.0000      | 1.0000        | 1.0000      | 1.0000          | 1.0000        | 1.0000      | 1.0000 |
| RMSD      |        |        |        | 0,7805      | 0,7774        | 0,7672      | 0.8046       | 0.8010        | 0.7912      | 0.7813      | 0.7778        | 0.7680      | 0.8137      | 0.8114        | 0.7991      | 0.7797      | 0.7766        | 0.7668      | 0.7896          | 0.7860        | 0.7762      |        |

*Dihedral angles (continuation)*

|           |        |        |        | M06-2X      |               |             | PBE0        |               |             | PBE0[GD3BJ] |               |             | PBE         |               |             | PW91        |               |             | wB97        |               |             |         |
|-----------|--------|--------|--------|-------------|---------------|-------------|-------------|---------------|-------------|-------------|---------------|-------------|-------------|---------------|-------------|-------------|---------------|-------------|-------------|---------------|-------------|---------|
| Atom I    | Atom J | Atom K | Atom L | 6-31+G(d,p) | 6-311++G(d,p) | aug-cc-pVTZ |         |
| 1         | 2      | 3      | 4      | 0.002       | 0.004         | 0.004       | 0           | 0             | 0           | 0           | 0             | 0           | 0           | 0             | 0           | 0           | 0             | 0           | 0.005       | 0,006         | 0,004       |         |
| 1         | 2      | 6      | 7      | 122.168     | 122.173       | 122.203     | 122.154     | 122.159       | 122.19      | 122.125     | 122.13        | 122.161     | 122.129     | 122.134       | 122.164     | 122.137     | 122.141       | 122.173     | 122.19      | 122,192       | 122,221     |         |
| 2         | 3      | 4      | 5      | 0.001       | 0.002         | 0.002       | 0           | 0             | 0           | 0           | 0             | 0           | 0           | 0             | 0           | 0           | 0             | 0           | 0.003       | 0,004         | 0,002       |         |
| 2         | 6      | 7      | 8      | 0.001       | 0.002         | 0.001       | 0           | 0             | 0.001       | 0           | 0             | 0           | 0.001       | 0.001         | 0.001       | 0.001       | 0.001         | 0.001       | 0.004       | 0,005         | 0,005       |         |
| 6         | 7      | 8      | 9      | 0           | 0             | 0           | 0           | 0             | 0           | 0           | 0             | 0           | 0           | 0             | 0           | 0           | 0             | 0           | 0.002       | 0,002         | 0,001       |         |
| INTERCEPT |        |        |        | -0,3875     | -0,3865       | -0,3869     | -0.3885     | -0.3885       | -0.3883     | -0.3884     | -0.3884       | -0.3885     | -0.3881     | -0.3881       | -0.3882     | -0.3882     | -0.3882       | -0.3883     | -0.3883     | -0.3851       | -0.3843     | -0.3857 |
| SLOPE     |        |        |        | 0,9902      | 0,9902        | 0,9905      | 0.9901      | 0.9901        | 0.9904      | 0.9899      | 0.9899        | 0.9902      | 0.9899      | 0.9899        | 0.9902      | 0.9900      | 0.9900        | 0.9903      | 0.9904      | 0.9904        | 0.9906      |         |
| CORREL    |        |        |        | 1,0000      | 1,0000        | 1,0000      | 1.0000      | 1.0000        | 1.0000      | 1.0000      | 1.0000        | 1.0000      | 1.0000      | 1.0000        | 1.0000      | 1.0000      | 1.0000        | 1.0000      | 1.0000      | 1.0000        | 1.0000      | 1.0000  |
| RMSD      |        |        |        | 0,8058      | 0,8034        | 0,7916      | 0.8118      | 0.8098        | 0.7974      | 0.8233      | 0.8213        | 0.8090      | 0.8217      | 0.8197        | 0.8077      | 0.8185      | 0.8169        | 0.8042      | 0.7962      | 0.7951        | 0.7842      |         |

*Dihedral angles (continuation)*

| Atom I | Atom J | Atom K | Atom L | HF          |              |             | MP2         |              |             | CCSD   | CASSCF (8,8) | X-Ray<br>[from<br>Haselbach et al] |
|--------|--------|--------|--------|-------------|--------------|-------------|-------------|--------------|-------------|--------|--------------|------------------------------------|
|        |        |        |        | 6-31+G(d,p) | 6-31++G(d,p) | aug-cc-pVTZ | 6-31+G(d,p) | 6-31++G(d,p) | aug-cc-pVTZ | 6-31G* | 6-31G*       |                                    |
| 1      | 2      | 3      | 4      | 0.214       | 0.203        | 0.186       | 0           | 0            | 0.001       | 0      | 0            | 0.408                              |
| 1      | 2      | 6      | 7      | 122.5       | 122.49       | 122.514     | 122.014     | 122.004      | 122.03      | 122,18 | 122,361      | 123.767                            |
| 2      | 3      | 4      | 5      | 0.541       | 0.511        | 0.467       | 0           | 0            | 0           | 0      | 0            | 0.584                              |
| 2      | 6      | 7      | 8      | 0.541       | 0.511        | 0.467       | 0           | 0            | 0           | 0      | 0            | 0.193                              |
| 6      | 7      | 8      | 9      | 0.688       | 0.651        | 0.596       | 0           | 0            | 0           | 0      | 0            | 0.385                              |

|           |        |        |        |        |        |        |        |        |
|-----------|--------|--------|--------|--------|--------|--------|--------|--------|
| INTERCEPT | 0,4960 | 0,4690 | 0,4290 | 0.0000 | 0.0000 | 0.0003 | 0.0000 | 0.0000 |
| SLOPE     | 0,9988 | 0,9989 | 0,9994 | 0.9988 | 0.9988 | 0.9990 | 1.0002 | 1.0017 |
| CORREL    | 1,0000 | 1,0000 | 1,0000 | 1.0000 | 1.0000 | 1.0000 | 1.0000 | 1.0000 |
| RMSD      | 0,4947 | 0,4689 | 0,4370 | 0.0631 | 0.0675 | 0.0559 | 0.0112 | 0.0921 |

**Comparison of the vibrational frequencies** of molecule **1**, computed at different levels of theory, and corresponding linear regression parameters, compared to experimental data.

|           | B3LYP       |               |             | B3LYP[GD3BJ] |               |             | BLYP        |               |             | BP86        |               |             | CAM-B3LYP   |               |             |
|-----------|-------------|---------------|-------------|--------------|---------------|-------------|-------------|---------------|-------------|-------------|---------------|-------------|-------------|---------------|-------------|
|           | 6-31+G(d,p) | 6-311++G(d,p) | aug-cc-pVTZ | 6-31+G(d,p)  | 6-311++G(d,p) | aug-cc-pVTZ | 6-31+G(d,p) | 6-311++G(d,p) | aug-cc-pVTZ | 6-31+G(d,p) | 6-311++G(d,p) | aug-cc-pVTZ | 6-31+G(d,p) | 6-311++G(d,p) | aug-cc-pVTZ |
|           | 1557.1      | 1545.88       | 1547.77     | 1558.61      | 1547.35       | 1549.21     | 1508.83     | 1500.05       | 1503.81     | 1498.97     | 1511.42       | 1513.27     | 1418.12     | 1594.12       | 1595.8      |
|           | 1197.44     | 1195.53       | 1196.5      | 1203.32      | 1201.58       | 1202.59     | 1153.83     | 1152.35       | 1153.57     | 1161.36     | 1160.1        | 1159.89     | 1170.12     | 1163.35       | 1163.57     |
|           | 1303.6      | 1296.68       | 1303.41     | 1303.9       | 1296.89       | 1303.58     | 1261.33     | 1255.44       | 1262.07     | 1253.02     | 1246.06       | 1250.54     | 1222.15     | 1220.02       | 1221.08     |
|           | 1056.72     | 1052.6        | 1052.14     | 1058.73      | 1054.5        | 1054.15     | 1082.05     | 1077.89       | 1080.24     | 1073.7      | 1068.2        | 1068.75     | 1070.71     | 1065.67       | 1065.58     |
|           | NOT FOUND   | NOT FOUND     | NOT FOUND   | NOT FOUND    | NOT FOUND     | NOT FOUND   | 1039.13     | 1034.55       | 1033.38     | 1026.33     | 1042.58       | 1040.94     | 1016.21     | 1010.17       | 1009.73     |
|           | 955.77      | 957.36        | 965.85      | 954.54       | 956.12        | 964.57      | 956.5       | 970.33        | 969.87      | 966.93      | 961.36        | 960.04      | 975.87      | 978.58        | 984.4       |
|           | 813.49      | 818.76        | 820.08      | 819.16       | 824.67        | 826.37      | NOT FOUND   | NOT FOUND     | NOT FOUND   | NOT FOUND   | NOT FOUND     | NOT FOUND   | 823.47      | 828.72        | 829.88      |
|           | 813.48      | NOT FOUND     | NOT FOUND   | NOT FOUND    | NOT FOUND     | NOT FOUND   | 798.51      | 800.94        | 801.52      | 800.38      | 803.31        | 803.38      | 796.9       | 792.78        | 796.57      |
|           | 723.17      | 721.66        | 725.97      | 722.15       | 751.36        | 724.9       | 742.4       | 735.61        | 742.65      | 739.03      | 734.13        | 739.91      | 743.81      | 742.15        | 745.27      |
| INTERCEPT | -67.6071    | -64.9399      | -60.2411    | -79.5106     | -32.9460      | -58.5629    | 4.4688      | 14.3293       | 15.2257     | 14.1954     | 3.1624        | 4.5827      | 102.205     | -50.6364      | -45.6539    |
| SLOPE     | 1.0748      | 1.0677        | 1.0664      | 1.0855       | 1.0438        | 1.0667      | 0.9939      | 0.9829        | 0.9844      | 0.9821      | 0.9933        | 0.9931      | 0.8873      | 1.0509        | 1.0479      |
| CORREL    | 0.9991      | 0.9992        | 0.9991      | 0.9992       | 0.9985        | 0.9990      | 0.9989      | 0.9991        | 0.9991      | 0.9996      | 0.9993        | 0.9993      | 0.9969      | 0.9913        | 0.9909      |

|           | CAM-B3LYP[GD3BJ] |               |             | M06-2X      |               |             | PBE0        |               |             | PBE0[GD3BJ] |               |             | PBE         |               |             |
|-----------|------------------|---------------|-------------|-------------|---------------|-------------|-------------|---------------|-------------|-------------|---------------|-------------|-------------|---------------|-------------|
|           | 6-31+G(d,p)      | 6-311++G(d,p) | aug-cc-pVTZ | 6-31+G(d,p) | 6-311++G(d,p) | aug-cc-pVTZ | 6-31+G(d,p) | 6-311++G(d,p) | aug-cc-pVTZ | 6-31+G(d,p) | 6-311++G(d,p) | aug-cc-pVTZ | 6-31+G(d,p) | 6-311++G(d,p) | aug-cc-pVTZ |
|           | 1418.06          | 1594.56       | 1596.22     | 1601.47     | 1588.09       | 1588.84     | 1584.43     | 1574.44       | 1572.91     | 1585        | 1574.98       | 1573.45     | 1506.67     | 1497.33       | 1496.36     |
|           | 1170.67          | 1163.87       | 1164        | 1163.23     | 1157.83       | 1155.9      | 1162.07     | 1155.95       | 1154.34     | 1162.91     | 1156.75       | 1155.06     | 1166.41     | 1165.36       | 1164.19     |
|           | 1224.59          | 1222.53       | 1223.62     | 1304.2      | 1298.72       | 1301.6      | 1305.02     | 1297.15       | 1300.52     | 1305.19     | 1297.3        | 1300.63     | 1253.49     | 1246.41       | 1249.68     |
|           | 1071.15          | 1066.07       | 1066        | 1060.23     | 1056.88       | 1054.7      | 1065.78     | 1060.48       | 1058.27     | 1066.35     | 1060.99       | 1058.81     | 1073.01     | 1067.21       | 1066.88     |
|           | 1017.63          | 1011.71       | 1011.35     | 1013.84     | NOT FOUND     | NOT FOUND   | 1024.02     | 1019.54       | 1017.73     | 1025.83     | 1021.48       | 1019.77     | 1030.01     | 1046.15       | 1044.13     |
|           | 975.52           | 978.23        | 984.03      | 969.12      | 971.32        | 975.23      | 960.78      | 962.39        | 966.97      | 960.16      | 961.77        | 966.54      | 973.19      | 967.85        | 965.93      |
|           | 826.25           | 831.62        | 832.97      | 814.01      | 818.65        | 818.03      | 814.74      | 819.13        | 819.11      | 817.89      | 822.41        | 822.57      | NOT FOUND   | NOT FOUND     | NOT FOUND   |
|           | 796.56           | 792.44        | 796.22      | 796.04      | 792.91        | 795.17      | 814.74      | NOT FOUND     | NOT FOUND   | NOT FOUND   | NOT FOUND     | NOT FOUND   | 801.71      | 804.68        | 804.23      |
|           | 743.49           | 741.83        | 744.95      | 742.59      | 740.81        | 743.24      | 727.94      | 727.1         | 729.66      | 727.5       | 726.65        | 729.2       | 740.19      | 735.82        | 740.88      |
| INTERCEPT | 102.572<br>0     | -50.6435      | -45.5271    | -96.3762    | -77.8880      | -75.3580    | -81.4760    | -83.1673      | -79.1681    | -96.4563    | -81.5384      | -77.2871    | 11.1844     | 21.4507       | 24.6065     |
| SLOPE     | 0.8876           | 1.0517        | 1.0485      | 1.1022      | 1.0852        | 1.0837      | 1.0873      | 1.0832        | 1.0798      | 1.0996      | 1.0823        | 1.0788      | 0.9879      | 0.9767        | 0.9739      |
| CORREL    | 0.9969           | 0.9915        | 0.9911      | 0.9959      | 0.9969        | 0.9965      | 0.9971      | 0.9971        | 0.9967      | 0.9973      | 0.9970        | 0.9967      | 0.9996      | 0.9995        | 0.9997      |

| PW91        |               |             | wB97        |               |             | HF          |               |             | MP2         |               |             | Experimental |
|-------------|---------------|-------------|-------------|---------------|-------------|-------------|---------------|-------------|-------------|---------------|-------------|--------------|
| 6-31+G(d,p) | 6-311++G(d,p) | aug-cc-pVTZ |              |
| 1507.01     | 1497.37       | 1497.48     | 1600.32     | 1589.69       | 1590.75     | 1527.4      | 1517.68       | 1523        | 1553.16     | 1523.46       | 1517.37     | 1508         |
| 1167.5      | 1166.32       | 1165.56     | 1167.03     | 1160.75       | 1160.31     | 1170.82     | 1166.44       | 1167.12     | 1173.32     | 1157.82       | 1147.63     | 1177         |
| 1257.51     | 1250.14       | 1254.12     | 1217.48     | 1307.3        | 1313.18     | 1235.39     | 1229.82       | 1229.75     | 1221.44     | 1209.38       | 1291.44     | 1266         |
| 1076.42     | 1070.33       | 1070.48     | 1068.05     | 1062.91       | 1062.4      | 1065.32     | 1054.82       | NOT FOUND   | 1081.37     | 1061.99       | 1054.42     | 1065         |
| 1031.71     | 1026.95       | 1045.45     | 1013.51     | NOT FOUND     | NOT FOUND   | 1040.76     | 1029.69       | 1048.6      | 1033.26     | 1020.6        | 1018.61     | 1036         |
| 973.4       | 967.83        | 966.2       | 967.92      | 970.96        | 976.69      | 957.85      | 963.4         | 976.67      | 926.62      | 1000.7        | 941.99      | 966          |
| NOT FOUND   | NOT FOUND     | NOT FOUND   | 819.12      | 822.86        | 823.42      | NOT FOUND   | NOT FOUND     | NOT FOUND   | 832.98      | 826.78        | 825.04      | 815          |
| 803.36      | 806.38        | 806.32      | 791.33      | 788.07        | 791.94      | 789.27      | 790.65        | 800.44      | 821.78      | 816.25        | 815.72      | 805          |
| 731.08      | 737.98        | 731.98      | 739.55      | 738.29        | 741.72      | 732.68      | 735.36        | 745.12      | 748.99      | 746.31        | 758.77      | 736          |

|           |        |         |         |          |          |         |          |          |         |         |         |        |
|-----------|--------|---------|---------|----------|----------|---------|----------|----------|---------|---------|---------|--------|
| INTERCEPT | 2.8456 | 19.7314 | 15.8466 | -66.6162 | -84.7824 | -       | -24.0839 | -10.2734 | 11.7375 | -1.9677 | 39.3162 | 8.1185 |
| SLOPE     | 0.9961 | 0.9774  | 0.9827  | 1.0651   | 1.0937   | 80.6563 | 1.0179   | 1.0013   | 0.9886  | 1.0039  | 0.9611  | 0.9919 |
| CORREL    | 0.9996 | 0.9997  | 0.9996  | 0.9915   | 0.9972   | 0.9969  | 0.9985   | 0.9986   | 0.9977  | 0.9934  | 0.9947  | 0.9966 |

# Vibrational Spectra

Level of theory: DFT B3LYP[GD3BJ] / 6-311++G\*\* (harmonic approximation).

1.-

| NM# | Symm | Wavenumber | Force Const | IR Intens  | Raman Activ  |
|-----|------|------------|-------------|------------|--------------|
| 1   | A    | 104.9916   | 0.0233      | 0.4910     | 512659.2065  |
| 2   | A    | 108.4074   | 0.0272      | 911.0605   | 625420.4927  |
| 3   | A    | 199.7079   | 0.0601      | 6.0412     | 6799953.6005 |
| 4   | A    | 395.6048   | 0.5229      | 0.9202     | *****        |
| 5   | A    | 480.2545   | 0.3389      | 169.8778   | *****        |
| 6   | A    | 510.0115   | 0.5213      | 28.6860    | *****        |
| 7   | A    | 522.9184   | 0.4525      | 1353.5216  | 570935.7932  |
| 8   | A    | 589.7404   | 0.4848      | 106.2395   | 4900879.8238 |
| 9   | A    | 625.7780   | 0.3071      | 4989.8839  | 2020782.4769 |
| 10  | A    | 656.5956   | 0.2974      | 144.2716   | 541739.9428  |
| 11  | A    | 690.3315   | 0.4359      | 0.1913     | 2633686.0925 |
| 12  | A    | 697.0260   | 0.4113      | 8780.4704  | 5775606.4489 |
| 13  | A    | 760.5893   | 0.7578      | 38628.6549 | *****        |
| 14  | A    | 806.8459   | 1.8637      | 1598.5060  | *****        |
| 15  | A    | 812.9131   | 1.2652      | 72.3823    | *****        |
| 16  | A    | 818.3722   | 1.5491      | 5120.3070  | 2275714.3410 |
| 17  | A    | 842.9643   | 0.6496      | 4.3836     | 5037907.6568 |
| 18  | A    | 857.4211   | 1.2911      | 30.2633    | 1684852.1022 |
| 19  | A    | 869.4377   | 0.6772      | 45.2117    | 7091754.0616 |
| 20  | A    | 869.6524   | 0.6613      | 7638.0517  | 3644327.9285 |
| 21  | A    | 880.6157   | 0.7891      | 8166.6549  | 4465808.2701 |
| 22  | A    | 1000.8842  | 1.0886      | 12708.9626 | *****        |
| 23  | A    | 1015.8497  | 1.3119      | 14.9930    | *****        |
| 24  | A    | 1051.2499  | 1.4114      | 117.0804   | *****        |
| 25  | A    | 1061.9395  | 0.9977      | 15.5844    | *****        |
| 26  | A    | 1064.0458  | 0.9525      | 88.3801    | *****        |
| 27  | A    | 1076.5138  | 1.5838      | 13270.8179 | *****        |
| 28  | A    | 1111.1970  | 1.0093      | 910.3376   | 3235732.4065 |
| 29  | A    | 1123.8595  | 1.5513      | 7.4512     | 4404160.0252 |
| 30  | A    | 1199.4809  | 1.7325      | 7773.4537  | 3880275.9407 |
| 31  | A    | 1279.0418  | 1.3866      | 4.3594     | *****        |
| 32  | A    | 1280.8435  | 1.3877      | 88.0989    | *****        |
| 33  | A    | 1334.6419  | 2.7720      | 312.4143   | *****        |
| 34  | A    | 1389.2265  | 2.5325      | 1651.6158  | *****        |
| 35  | A    | 1422.9913  | 3.2438      | 4.6697     | *****        |
| 36  | A    | 1545.7825  | 6.5018      | 4.1448     | *****        |
| 37  | A    | 1564.0452  | 7.0768      | 331.3215   | *****        |
| 38  | A    | 3136.9936  | 6.3080      | 13502.2837 | *****        |
| 39  | A    | 3144.4097  | 6.3391      | 471.1656   | *****        |
| 40  | A    | 3177.7270  | 6.4742      | 2992.3239  | 899879.4207  |
| 41  | A    | 3179.3109  | 6.4826      | 0.3746     | 5876382.5283 |
| 42  | A    | 3203.0786  | 6.6251      | 1317.0729  | 1977828.0885 |
| 43  | A    | 3204.2865  | 6.6317      | 1.8997     | *****        |
| 44  | A    | 3205.0720  | 6.6254      | 609.3946   | *****        |
| 45  | A    | 3209.5771  | 6.6641      | 141.3085   | *****        |

1.+

| NM# | Symm | Wavenumber | Force Const | IR Intens | Raman Activ |
|-----|------|------------|-------------|-----------|-------------|
| 1   | A    | 90.8622    | 0.0176      | 1.0530    | 3.2594      |
| 2   | A    | 90.8626    | 0.0176      | 1.0530    | 3.2594      |
| 3   | A    | 237.5889   | 0.1043      | 0.0000    | 8.3303      |
| 4   | A    | 443.6205   | 0.6449      | 0.0000    | 160.8292    |
| 5   | A    | 487.5110   | 0.3552      | 0.0000    | 0.0000      |
| 6   | A    | 491.7830   | 0.4023      | 1.9149    | 0.6933      |

|    |   |           |        |          |          |
|----|---|-----------|--------|----------|----------|
| 7  | A | 491.7833  | 0.4023 | 1.9149   | 0.6933   |
| 8  | A | 596.1657  | 0.4600 | 0.0000   | 1.2072   |
| 9  | A | 774.2235  | 0.4266 | 73.2991  | 1.6836   |
| 10 | A | 774.2239  | 0.4266 | 73.2991  | 1.6836   |
| 11 | A | 799.9747  | 0.4778 | 0.0000   | 0.0000   |
| 12 | A | 803.8013  | 2.3467 | 100.7140 | 0.2065   |
| 13 | A | 820.1315  | 0.5611 | 0.0000   | 0.1523   |
| 14 | A | 830.6412  | 2.2650 | 0.1136   | 3.4137   |
| 15 | A | 830.6415  | 2.2650 | 0.1136   | 3.4137   |
| 16 | A | 894.4698  | 1.5365 | 0.0000   | 45.3017  |
| 17 | A | 974.6290  | 0.7724 | 0.0094   | 0.8210   |
| 18 | A | 974.6292  | 0.7724 | 0.0094   | 0.8210   |
| 19 | A | 999.0758  | 0.8769 | 0.0000   | 0.1822   |
| 20 | A | 1004.2636 | 0.8762 | 0.0000   | 0.0000   |
| 21 | A | 1029.6170 | 1.0787 | 92.2506  | 0.0042   |
| 22 | A | 1063.8875 | 1.5287 | 0.0000   | 67.3102  |
| 23 | A | 1071.0589 | 0.8447 | 22.4313  | 0.3187   |
| 24 | A | 1085.6350 | 1.1065 | 2.5879   | 4.9724   |
| 25 | A | 1085.6355 | 1.1065 | 2.5879   | 4.9723   |
| 26 | A | 1117.8179 | 0.8083 | 0.0000   | 0.8260   |
| 27 | A | 1169.2349 | 1.7123 | 0.6054   | 3.3724   |
| 28 | A | 1169.2369 | 1.7123 | 0.6054   | 3.3725   |
| 29 | A | 1215.2080 | 4.3204 | 151.1911 | 8.5798   |
| 30 | A | 1315.7039 | 1.5724 | 0.9236   | 0.0632   |
| 31 | A | 1315.7043 | 1.5724 | 0.9236   | 0.0632   |
| 32 | A | 1403.2844 | 5.0624 | 259.8610 | 22.5643  |
| 33 | A | 1424.0549 | 2.5122 | 0.0000   | 16.9463  |
| 34 | A | 1426.7096 | 2.6770 | 4.0541   | 0.0176   |
| 35 | A | 1494.1138 | 7.5539 | 0.0000   | 85.1128  |
| 36 | A | 1526.4511 | 5.7101 | 42.7213  | 97.1589  |
| 37 | A | 1526.4515 | 5.7101 | 42.7212  | 97.1593  |
| 38 | A | 3215.2899 | 6.6400 | 0.5599   | 89.8339  |
| 39 | A | 3215.2900 | 6.6400 | 0.5597   | 89.8368  |
| 40 | A | 3223.5132 | 6.6865 | 9.7029   | 7.7200   |
| 41 | A | 3224.5184 | 6.6972 | 0.0000   | 262.2930 |
| 42 | A | 3237.2506 | 6.7806 | 9.5423   | 17.3915  |
| 43 | A | 3237.2520 | 6.7806 | 9.5424   | 17.3887  |
| 44 | A | 3241.9178 | 6.8531 | 0.9552   | 102.1151 |
| 45 | A | 3242.7136 | 6.8516 | 0.0000   | 434.6747 |

1

| NM# | Symm | Wavenumber | Force Const | IR Intens | Raman Activ |
|-----|------|------------|-------------|-----------|-------------|
| 1   | A    | 118.2916   | 0.0300      | 0.8895    | 2.3551      |
| 2   | A    | 118.2916   | 0.0300      | 0.8895    | 2.3551      |
| 3   | A    | 223.0457   | 0.0781      | 0.0000    | 5.7093      |
| 4   | A    | 442.4684   | 0.6362      | 0.0000    | 6.8495      |
| 5   | A    | 516.8042   | 0.4509      | 2.7688    | 0.1324      |
| 6   | A    | 516.8042   | 0.4509      | 2.7688    | 0.1324      |
| 7   | A    | 525.9862   | 0.4406      | 0.0000    | 0.0000      |
| 8   | A    | 620.2567   | 0.5918      | 0.0000    | 0.9528      |
| 9   | A    | 720.6414   | 0.3963      | 0.0000    | 0.0000      |
| 10  | A    | 751.3584   | 0.4118      | 88.6750   | 0.0013      |
| 11  | A    | 751.3584   | 0.4118      | 88.6751   | 0.0013      |
| 12  | A    | 770.7977   | 0.5117      | 0.0000    | 0.0016      |
| 13  | A    | 824.6880   | 2.2540      | 0.9564    | 1.7849      |
| 14  | A    | 824.6880   | 2.2540      | 0.9564    | 1.7849      |
| 15  | A    | 833.2668   | 1.9541      | 11.0519   | 2.0977      |
| 16  | A    | 872.5291   | 1.4345      | 0.0000    | 9.2845      |
| 17  | A    | 950.8626   | 0.7384      | 0.0000    | 0.0000      |
| 18  | A    | 955.5142   | 0.7589      | 0.0000    | 2.3759      |
| 19  | A    | 956.1211   | 0.7048      | 0.0014    | 1.9869      |
| 20  | A    | 956.1211   | 0.7048      | 0.0014    | 1.9869      |



|    |   |           |        |         |          |
|----|---|-----------|--------|---------|----------|
| 21 | A | 981.2530  | 1.1781 | 21.9413 | 1.4600   |
| 22 | A | 1003.0227 | 1.5893 | 0.0000  | 18.3018  |
| 23 | A | 1054.4868 | 0.9088 | 10.0676 | 1.5257   |
| 24 | A | 1081.6062 | 1.3707 | 14.7563 | 0.3726   |
| 25 | A | 1081.6062 | 1.3707 | 14.7563 | 0.3726   |
| 26 | A | 1107.0128 | 0.7764 | 0.0000  | 47.7401  |
| 27 | A | 1142.0415 | 1.2800 | 0.0003  | 7.9802   |
| 28 | A | 1142.0415 | 1.2800 | 0.0003  | 7.9802   |
| 29 | A | 1201.5795 | 2.3770 | 5.3946  | 0.1889   |
| 30 | A | 1296.8948 | 1.4320 | 0.5559  | 0.7592   |
| 31 | A | 1296.8948 | 1.4320 | 0.5559  | 0.7592   |
| 32 | A | 1384.8665 | 2.2349 | 0.2944  | 4.3113   |
| 33 | A | 1385.0642 | 2.1158 | 0.0000  | 8.3210   |
| 34 | A | 1547.3501 | 9.9503 | 12.3843 | 17.4279  |
| 35 | A | 1569.4994 | 9.7424 | 0.0000  | 166.5514 |
| 36 | A | 1630.6031 | 8.7127 | 0.1462  | 0.1264   |
| 37 | A | 1630.6031 | 8.7127 | 0.1462  | 0.1264   |
| 38 | A | 3190.5356 | 6.5211 | 5.7127  | 105.5349 |
| 39 | A | 3190.5356 | 6.5211 | 5.7127  | 105.5349 |
| 40 | A | 3201.3335 | 6.5780 | 16.4481 | 1.8995   |
| 41 | A | 3202.0100 | 6.5845 | 0.0000  | 277.3453 |
| 42 | A | 3224.7317 | 6.7350 | 8.1088  | 1.2807   |
| 43 | A | 3224.7317 | 6.7350 | 8.1088  | 1.2807   |
| 44 | A | 3228.5994 | 6.7922 | 10.9348 | 139.0652 |
| 45 | A | 3230.5915 | 6.7970 | 0.0000  | 321.6543 |

2-

| NM# | Symm | Wavenumber | Force Const | IR Intens | Raman Activ |
|-----|------|------------|-------------|-----------|-------------|
| 1   | A    | 263.0799   | 0.0539      | 46.1842   | 2330.2538   |
| 2   | A    | 345.1527   | 0.1739      | 7.3989    | 132.1945    |
| 3   | A    | 385.3743   | 0.2058      | 10.7621   | 41.8978     |
| 4   | A    | 465.1976   | 0.3855      | 16.4422   | 375.6310    |
| 5   | A    | 515.7766   | 0.2445      | 295.9968  | 7505.6941   |
| 6   | A    | 636.7913   | 0.4482      | 93.0651   | 3791.8671   |
| 7   | A    | 673.4508   | 0.4762      | 157.4315  | 1570.1727   |
| 8   | A    | 677.8829   | 0.8182      | 25.8861   | 413.0320    |
| 9   | A    | 791.7904   | 0.5138      | 2.5346    | 756.3107    |
| 10  | A    | 831.1098   | 0.6005      | 32.1463   | 5610.9182   |
| 11  | A    | 882.3818   | 0.8967      | 0.3743    | 2760.1392   |
| 12  | A    | 978.4789   | 0.8134      | 28.7880   | 1666.1192   |
| 13  | A    | 1024.5932  | 1.0534      | 21.4931   | 229.0195    |
| 14  | A    | 1059.7410  | 1.2884      | 9.2653    | 741.5375    |
| 15  | A    | 1150.6086  | 2.7228      | 11.5264   | 1876.6610   |
| 16  | A    | 1461.6312  | 9.6211      | 110.1877  | 438.7255    |
| 17  | A    | 1592.7581  | 8.6333      | 274.0796  | 675.5147    |
| 18  | A    | 2932.9244  | 5.4945      | 255.9619  | 43222.7313  |
| 19  | A    | 2992.6462  | 5.8035      | 366.4617  | 3743.3313   |
| 20  | A    | 3097.6593  | 6.1567      | 136.3865  | 900.5111    |
| 21  | A    | 3165.3541  | 6.6275      | 25.1235   | 632.6333    |

2

| NM# | Symm | Wavenumber | Force Const | IR Intens | Raman Activ |
|-----|------|------------|-------------|-----------|-------------|
| 1   | A    | 377.9427   | 0.1842      | 26.8940   | 7.0325      |
| 2   | A    | 377.9427   | 0.1842      | 26.8940   | 7.0325      |
| 3   | A    | 404.0199   | 0.2648      | 0.0000    | 10.1451     |
| 4   | A    | 566.1637   | 0.2669      | 32.5827   | 2.9855      |
| 5   | A    | 566.1637   | 0.2669      | 32.5827   | 2.9855      |
| 6   | A    | 699.0307   | 0.8701      | 0.0000    | 22.5762     |
| 7   | A    | 802.2120   | 1.3168      | 25.4145   | 15.2687     |

|    |   |           |         |          |          |
|----|---|-----------|---------|----------|----------|
| 8  | A | 802.2120  | 1.3168  | 25.4145  | 15.2687  |
| 9  | A | 895.8326  | 0.6638  | 0.0000   | 0.6849   |
| 10 | A | 896.0709  | 0.6744  | 0.0000   | 0.0000   |
| 11 | A | 904.5517  | 0.5245  | 2.3689   | 3.3070   |
| 12 | A | 997.1515  | 0.7664  | 0.0000   | 13.6462  |
| 13 | A | 1074.5790 | 1.2281  | 18.8743  | 0.7892   |
| 14 | A | 1074.5790 | 1.2281  | 18.8743  | 0.7892   |
| 15 | A | 1466.0886 | 10.7556 | 160.0363 | 4.5491   |
| 16 | A | 1646.2260 | 9.0886  | 0.0000   | 96.9949  |
| 17 | A | 1661.2166 | 9.0705  | 101.6751 | 13.3432  |
| 18 | A | 3193.7956 | 6.5146  | 5.8784   | 166.1075 |
| 19 | A | 3193.7956 | 6.5146  | 5.8784   | 166.1075 |
| 20 | A | 3233.5814 | 6.9991  | 0.0000   | 387.7864 |
| 21 | A | 3237.5724 | 7.0356  | 3.2543   | 112.5739 |

3-

| NM# | Symm | Wavenumber | Force Const | IR Intens | Raman Activ |
|-----|------|------------|-------------|-----------|-------------|
| 1   | A    | 55.2311    | 0.0070      | 0.0875    | 4.7174      |
| 2   | A    | 55.2316    | 0.0070      | 0.0875    | 4.7174      |
| 3   | A    | 124.0855   | 0.0354      | 0.0000    | 11.3426     |
| 4   | A    | 239.8815   | 0.2183      | 0.0000    | 133.3404    |
| 5   | A    | 269.5643   | 0.1491      | 0.0000    | 0.0000      |
| 6   | A    | 270.3216   | 0.1269      | 0.6716    | 2.4691      |
| 7   | A    | 270.3218   | 0.1269      | 0.6716    | 2.4691      |
| 8   | A    | 427.9048   | 0.7350      | 0.6143    | 7.5597      |
| 9   | A    | 427.9048   | 0.7350      | 0.6143    | 7.5597      |
| 10  | A    | 433.3324   | 0.7969      | 0.4259    | 4.2966      |
| 11  | A    | 453.9114   | 0.3284      | 0.0000    | 0.0312      |
| 12  | A    | 521.0264   | 0.4250      | 13.2124   | 0.9787      |
| 13  | A    | 521.0264   | 0.4250      | 13.2124   | 0.9787      |
| 14  | A    | 587.0358   | 0.7094      | 0.0000    | 0.0000      |
| 15  | A    | 600.6605   | 1.2439      | 0.0000    | 85.8593     |
| 16  | A    | 634.4966   | 1.1106      | 0.0000    | 0.1344      |
| 17  | A    | 660.8023   | 0.3337      | 86.6775   | 28.9459     |
| 18  | A    | 660.8023   | 0.3337      | 86.6774   | 28.9459     |
| 19  | A    | 728.3487   | 0.4152      | 0.0000    | 0.0000      |
| 20  | A    | 742.8538   | 0.4383      | 0.0000    | 1.2853      |
| 21  | A    | 761.0328   | 0.4764      | 0.9069    | 0.5485      |
| 22  | A    | 761.0329   | 0.4764      | 0.9069    | 0.5485      |
| 23  | A    | 804.5308   | 2.2244      | 15.2689   | 9.6626      |
| 24  | A    | 843.1932   | 2.5040      | 0.0000    | 87.1457     |
| 25  | A    | 878.1873   | 0.5684      | 0.0000    | 1.0443      |
| 26  | A    | 879.1710   | 0.5650      | 0.0000    | 0.0000      |
| 27  | A    | 893.3782   | 2.2270      | 0.2718    | 5.8451      |
| 28  | A    | 893.3783   | 2.2270      | 0.2718    | 5.8451      |
| 29  | A    | 920.4119   | 1.7522      | 19.9856   | 0.5155      |
| 30  | A    | 920.8430   | 0.6324      | 0.1039    | 0.0112      |
| 31  | A    | 920.8431   | 0.6324      | 0.1039    | 0.0112      |
| 32  | A    | 929.7184   | 0.6021      | 0.0000    | 3.0832      |
| 33  | A    | 934.3889   | 1.5163      | 0.0000    | 82.0682     |
| 34  | A    | 934.7510   | 0.6141      | 0.0000    | 0.0000      |
| 35  | A    | 996.0253   | 2.6104      | 1.5165    | 5.5028      |
| 36  | A    | 1004.1609  | 1.6253      | 23.3224   | 3.6287      |
| 37  | A    | 1004.1610  | 1.6253      | 23.3225   | 3.6287      |
| 38  | A    | 1165.5214  | 1.8423      | 5.2892    | 3.7275      |
| 39  | A    | 1165.5217  | 1.8423      | 5.2893    | 3.7275      |
| 40  | A    | 1230.3651  | 1.0761      | 40.0384   | 11.3640     |
| 41  | A    | 1231.1155  | 1.0671      | 0.0000    | 150.4840    |
| 42  | A    | 1272.2358  | 0.9893      | 0.0000    | 37.9772     |
| 43  | A    | 1279.5642  | 1.0459      | 33.0717   | 1.6034      |
| 44  | A    | 1310.1965  | 1.3004      | 1.5184    | 0.9024      |
| 45  | A    | 1310.1968  | 1.3004      | 1.5184    | 0.9024      |

|    |   |           |         |           |           |
|----|---|-----------|---------|-----------|-----------|
| 46 | A | 1398.0926 | 1.5324  | 0.5885    | 0.7353    |
| 47 | A | 1398.0927 | 1.5324  | 0.5885    | 0.7353    |
| 48 | A | 1442.1497 | 1.8369  | 64.1618   | 3.2424    |
| 49 | A | 1451.5287 | 1.7437  | 0.0000    | 31.8368   |
| 50 | A | 1476.0088 | 2.2768  | 0.0651    | 30.4529   |
| 51 | A | 1476.0088 | 2.2768  | 0.0652    | 30.4529   |
| 52 | A | 1514.7416 | 9.3554  | 1092.7800 | 29.1640   |
| 53 | A | 1582.5666 | 9.5790  | 15.3326   | 0.3065    |
| 54 | A | 1582.5666 | 9.5790  | 15.3326   | 0.3065    |
| 55 | A | 1602.7801 | 11.2986 | 0.0000    | 88.6788   |
| 56 | A | 1626.3590 | 6.2487  | 0.0599    | 1.6386    |
| 57 | A | 1633.6140 | 7.2333  | 0.0000    | 1312.4368 |
| 58 | A | 3079.4937 | 6.0366  | 34.1638   | 7.1230    |
| 59 | A | 3079.4937 | 6.0366  | 34.1637   | 7.1229    |
| 60 | A | 3082.9424 | 6.0654  | 13.2250   | 119.9913  |
| 61 | A | 3083.3486 | 6.0681  | 0.0000    | 123.7230  |
| 62 | A | 3103.9725 | 6.1611  | 60.3410   | 234.8716  |
| 63 | A | 3103.9725 | 6.1611  | 60.3411   | 234.8715  |
| 64 | A | 3126.2403 | 6.2836  | 265.3863  | 16.3638   |
| 65 | A | 3127.0524 | 6.2865  | 0.0000    | 466.6217  |
| 66 | A | 3137.5122 | 6.3136  | 54.4899   | 0.0008    |
| 67 | A | 3137.5124 | 6.3136  | 54.4895   | 0.0008    |
| 68 | A | 3142.2411 | 6.3429  | 5.8736    | 171.4669  |
| 69 | A | 3144.3634 | 6.3515  | 0.0000    | 397.3104  |

3.+

| NM# | Symm | Wavenumber | Force Const | IR Intens | Raman Activ |
|-----|------|------------|-------------|-----------|-------------|
| 1   | A    | 51.6707    | 0.0053      | 16.3901   | 3.2173      |
| 2   | A    | 73.1165    | 0.0117      | 0.0008    | 3.0991      |
| 3   | A    | 142.6577   | 0.0458      | 0.3073    | 175.0390    |
| 4   | A    | 225.0043   | 0.1006      | 25.0813   | 2.2761      |
| 5   | A    | 228.6634   | 0.1095      | 0.2626    | 290.2489    |
| 6   | A    | 290.2979   | 0.1491      | 0.2521    | 523.4794    |
| 7   | A    | 298.0529   | 0.1490      | 14.6109   | 1.5132      |
| 8   | A    | 310.0532   | 0.2431      | 0.1204    | 226.0529    |
| 9   | A    | 393.3404   | 0.5566      | 7.8251    | 17.2283     |
| 10  | A    | 419.8740   | 0.4735      | 7.7426    | 5.7321      |
| 11  | A    | 433.9768   | 0.3570      | 7.0939    | 537.7759    |
| 12  | A    | 460.9003   | 0.5016      | 2.0171    | 8.8830      |
| 13  | A    | 470.2707   | 0.3149      | 7.1838    | 0.2212      |
| 14  | A    | 567.6043   | 0.4945      | 10.5371   | 0.2778      |
| 15  | A    | 588.2412   | 0.6510      | 0.0134    | 705.9767    |
| 16  | A    | 610.7368   | 1.0130      | 0.1856    | 27.5809     |
| 17  | A    | 673.0328   | 0.5902      | 79.7251   | 3.8511      |
| 18  | A    | 698.7059   | 0.3709      | 20.2142   | 149.0715    |
| 19  | A    | 764.0657   | 0.5429      | 10.5371   | 9.8822      |
| 20  | A    | 784.6680   | 1.2157      | 87.6796   | 3.4079      |
| 21  | A    | 786.3997   | 0.6185      | 2.1847    | 33.5251     |
| 22  | A    | 822.3592   | 1.1780      | 4.1202    | 152.7279    |
| 23  | A    | 828.2337   | 0.6304      | 265.5591  | 0.6096      |
| 24  | A    | 880.8034   | 0.6464      | 0.1331    | 2.9420      |
| 25  | A    | 900.6601   | 1.8877      | 1.4138    | 23.1422     |
| 26  | A    | 900.7916   | 2.0337      | 0.2646    | 56.2987     |
| 27  | A    | 940.2156   | 1.7600      | 30.3072   | 4.7685      |
| 28  | A    | 943.3178   | 1.1578      | 26.9770   | 0.7804      |
| 29  | A    | 949.5288   | 1.5068      | 1.6577    | 84.6648     |
| 30  | A    | 1001.0390  | 0.8631      | 13.5662   | 2.3816      |
| 31  | A    | 1002.2237  | 0.7981      | 0.0108    | 143.5585    |
| 32  | A    | 1013.1989  | 0.8308      | 2.1631    | 32.2881     |
| 33  | A    | 1013.4661  | 0.9266      | 36.0507   | 3.1616      |
| 34  | A    | 1026.5495  | 0.8837      | 0.1422    | 23.4372     |
| 35  | A    | 1029.7693  | 0.9161      | 6.3807    | 8.1293      |

|    |   |           |        |          |          |
|----|---|-----------|--------|----------|----------|
| 36 | A | 1035.3558 | 1.4464 | 3.0487   | 1.5948   |
| 37 | A | 1045.2780 | 1.6063 | 1.2342   | 144.4124 |
| 38 | A | 1129.4207 | 2.0263 | 60.1488  | 26.6107  |
| 39 | A | 1179.1426 | 2.1370 | 1.4411   | 880.5462 |
| 40 | A | 1253.3358 | 1.1362 | 19.6239  | 1.7179   |
| 41 | A | 1253.6191 | 1.1208 | 4.5101   | 158.0551 |
| 42 | A | 1269.1380 | 1.1152 | 381.3374 | 22.0441  |
| 43 | A | 1283.6203 | 1.0250 | 0.4886   | 42.9234  |
| 44 | A | 1296.3024 | 1.1066 | 33.2067  | 14.0877  |
| 45 | A | 1337.1615 | 1.4000 | 1.3316   | 72.7404  |
| 46 | A | 1387.8056 | 1.4892 | 72.2342  | 13.7063  |
| 47 | A | 1398.6260 | 1.5564 | 3.1096   | 19.8942  |
| 48 | A | 1448.6972 | 1.7869 | 10.6737  | 14.6586  |
| 49 | A | 1459.9847 | 1.7559 | 10.8296  | 22.6170  |
| 50 | A | 1470.7328 | 3.9948 | 874.2158 | 24.5146  |
| 51 | A | 1493.0152 | 2.1710 | 6.7024   | 149.5686 |
| 52 | A | 1497.1442 | 2.5507 | 279.4157 | 33.6376  |
| 53 | A | 1565.5011 | 7.9456 | 0.2837   | 533.3652 |
| 54 | A | 1595.2107 | 7.7361 | 13.9597  | 858.9246 |
| 55 | A | 1600.4404 | 6.9253 | 17.1266  | 95.6883  |
| 56 | A | 1652.4237 | 7.2751 | 2.6833   | 183.2093 |
| 57 | A | 1662.3943 | 7.7836 | 10.7988  | 55.7034  |
| 58 | A | 3153.5120 | 6.3586 | 0.1993   | 52.8216  |
| 59 | A | 3155.1418 | 6.3684 | 0.9316   | 53.3429  |
| 60 | A | 3155.2083 | 6.3683 | 0.0555   | 69.7471  |
| 61 | A | 3157.2612 | 6.3817 | 0.1354   | 42.7858  |
| 62 | A | 3167.7531 | 6.4432 | 0.0309   | 35.5367  |
| 63 | A | 3170.8754 | 6.4418 | 0.4112   | 194.4211 |
| 64 | A | 3174.1406 | 6.4749 | 0.0655   | 189.4364 |
| 65 | A | 3177.2326 | 6.4962 | 0.1884   | 132.7484 |
| 66 | A | 3179.7610 | 6.5045 | 0.2506   | 16.8562  |
| 67 | A | 3180.0726 | 6.5066 | 0.4419   | 69.8258  |
| 68 | A | 3187.0935 | 6.5503 | 0.0031   | 885.7825 |
| 69 | A | 3187.1583 | 6.5506 | 0.6460   | 101.1433 |

3

| NM# | Symm | Wavenumber | Force Const | IR Intens | Raman Activ |
|-----|------|------------|-------------|-----------|-------------|
| 1   | A    | 93.2556    | 0.0220      | 0.0006    | 5.1442      |
| 2   | A    | 133.4488   | 0.0397      | 0.2705    | 1.3981      |
| 3   | A    | 151.8978   | 0.0504      | 0.0273    | 3.6272      |
| 4   | A    | 257.9699   | 0.1383      | 0.5335    | 2.9555      |
| 5   | A    | 262.8659   | 0.1226      | 0.1375    | 2.2214      |
| 6   | A    | 296.5912   | 0.2163      | 0.2463    | 2.7511      |
| 7   | A    | 346.9537   | 0.2178      | 3.6248    | 1.5033      |
| 8   | A    | 372.9775   | 0.2375      | 0.1766    | 7.8682      |
| 9   | A    | 378.5575   | 0.2726      | 1.9748    | 2.5268      |
| 10  | A    | 412.3789   | 0.4305      | 4.5251    | 1.3917      |
| 11  | A    | 441.0490   | 0.3685      | 4.6402    | 7.7519      |
| 12  | A    | 465.5691   | 0.3918      | 5.3321    | 1.7789      |
| 13  | A    | 485.8066   | 0.4754      | 0.9853    | 1.7706      |
| 14  | A    | 619.0940   | 1.0406      | 0.0005    | 15.2047     |
| 15  | A    | 625.5120   | 0.6800      | 0.4547    | 0.1403      |
| 16  | A    | 662.4941   | 0.7744      | 0.0065    | 6.7210      |
| 17  | A    | 701.4853   | 0.4241      | 135.9632  | 0.0085      |
| 18  | A    | 704.2406   | 0.4150      | 12.7844   | 2.0994      |
| 19  | A    | 760.6200   | 0.6466      | 40.4658   | 0.5357      |
| 20  | A    | 762.2242   | 0.6284      | 29.4340   | 0.3342      |
| 21  | A    | 765.2468   | 0.4970      | 18.4448   | 0.2759      |
| 22  | A    | 800.5142   | 1.0129      | 2.3092    | 8.7164      |
| 23  | A    | 833.2851   | 0.7828      | 0.0965    | 5.3760      |
| 24  | A    | 834.1401   | 0.7808      | 0.2575    | 0.2002      |
| 25  | A    | 904.4905   | 2.1279      | 0.0501    | 0.1141      |

|    |   |           |         |         |          |
|----|---|-----------|---------|---------|----------|
| 26 | A | 926.0902  | 2.3311  | 0.4517  | 5.1701   |
| 27 | A | 951.3363  | 1.4652  | 2.0204  | 0.8334   |
| 28 | A | 955.9754  | 1.1927  | 0.1627  | 2.6911   |
| 29 | A | 966.3244  | 0.8265  | 1.5982  | 3.5516   |
| 30 | A | 974.3934  | 0.9126  | 0.2632  | 35.0739  |
| 31 | A | 982.6246  | 0.7547  | 0.1681  | 6.2440   |
| 32 | A | 983.4034  | 0.7578  | 1.9100  | 1.0975   |
| 33 | A | 1001.3421 | 0.7652  | 0.0193  | 6.2850   |
| 34 | A | 1001.4764 | 0.7664  | 0.8446  | 4.8730   |
| 35 | A | 1021.8779 | 1.4780  | 5.8833  | 0.2601   |
| 36 | A | 1038.6955 | 1.4496  | 3.2931  | 1.9079   |
| 37 | A | 1106.6033 | 2.5807  | 11.2382 | 1.9335   |
| 38 | A | 1115.5610 | 1.7476  | 0.6638  | 1.0729   |
| 39 | A | 1127.0292 | 1.8012  | 0.0065  | 1.6208   |
| 40 | A | 1223.9917 | 0.9933  | 0.8215  | 11.0414  |
| 41 | A | 1228.5708 | 0.9996  | 0.2402  | 10.9485  |
| 42 | A | 1240.1490 | 1.0044  | 2.0547  | 12.7658  |
| 43 | A | 1241.6863 | 0.9905  | 0.9490  | 5.4831   |
| 44 | A | 1258.9842 | 1.1925  | 2.7905  | 0.3098   |
| 45 | A | 1272.4428 | 1.2423  | 4.1355  | 13.9780  |
| 46 | A | 1377.5363 | 1.4779  | 0.2720  | 0.2231   |
| 47 | A | 1382.9259 | 1.4790  | 0.0974  | 0.8160   |
| 48 | A | 1419.8151 | 1.8537  | 0.7965  | 0.1304   |
| 49 | A | 1434.6361 | 1.7705  | 2.1662  | 0.5981   |
| 50 | A | 1475.1033 | 2.2712  | 0.7817  | 5.4695   |
| 51 | A | 1476.8833 | 2.2710  | 0.9194  | 17.4582  |
| 52 | A | 1561.1378 | 11.5834 | 0.3915  | 265.5368 |
| 53 | A | 1563.4346 | 11.7989 | 0.4793  | 8.3650   |
| 54 | A | 1650.4673 | 11.5264 | 2.1341  | 5.8906   |
| 55 | A | 1659.7853 | 10.2229 | 2.2421  | 29.4558  |
| 56 | A | 1659.9395 | 7.8328  | 0.4489  | 2.1880   |
| 57 | A | 1666.5804 | 8.6293  | 0.1916  | 17.7555  |
| 58 | A | 3127.8233 | 6.2420  | 4.0034  | 44.2489  |
| 59 | A | 3128.5153 | 6.2452  | 1.0578  | 32.2041  |
| 60 | A | 3131.1389 | 6.2648  | 4.7032  | 127.4615 |
| 61 | A | 3131.9398 | 6.2713  | 0.0124  | 58.7801  |
| 62 | A | 3141.6878 | 6.3189  | 10.7243 | 47.2510  |
| 63 | A | 3142.5315 | 6.3203  | 3.2783  | 210.5026 |
| 64 | A | 3151.1173 | 6.3997  | 1.2387  | 112.0616 |
| 65 | A | 3154.6045 | 6.4088  | 65.9859 | 49.4707  |
| 66 | A | 3160.9642 | 6.4418  | 56.0382 | 26.0275  |
| 67 | A | 3161.8205 | 6.4457  | 0.9498  | 615.9352 |
| 68 | A | 3175.3529 | 6.4937  | 13.2862 | 8.4036   |
| 69 | A | 3176.9507 | 6.5020  | 0.5372  | 206.5884 |

4.-

| NM# | Symm | Wavenumber | Force Const | IR Intens | Raman Activ |
|-----|------|------------|-------------|-----------|-------------|
| 1   | A    | 297.7736   | 0.0808      | 122.0281  | 104418.4284 |
| 2   | A    | 522.0787   | 0.3832      | 0.0000    | 24979.6930  |
| 3   | A    | 668.8617   | 0.3141      | 331.6978  | 29129.2367  |
| 4   | A    | 716.6664   | 0.3844      | 0.0001    | 348019.4554 |
| 5   | A    | 813.6166   | 1.9382      | 39.9924   | 45397.5923  |
| 6   | A    | 816.8731   | 2.1532      | 79.1791   | 93076.4276  |
| 7   | A    | 919.3227   | 0.7544      | 210.5560  | 143720.7286 |
| 8   | A    | 920.5587   | 1.0195      | 377.0686  | 39586.3660  |
| 9   | A    | 955.8127   | 0.7124      | 0.0000    | 2186.0883   |
| 10  | A    | 962.2968   | 0.8469      | 484.5110  | 544.9389    |
| 11  | A    | 966.3820   | 0.8260      | 61.0958   | 67418.9686  |
| 12  | A    | 1013.5906  | 1.4487      | 28.5092   | 57359.0688  |
| 13  | A    | 1094.2743  | 0.9765      | 44.7447   | 77748.1619  |
| 14  | A    | 1116.9090  | 0.9704      | 1.6318    | 165656.9127 |
| 15  | A    | 1135.2000  | 0.8678      | 0.0000    | 2179.1984   |

|    |   |           |        |           |             |
|----|---|-----------|--------|-----------|-------------|
| 16 | A | 1263.1286 | 1.5761 | 70.6962   | 4065.0932   |
| 17 | A | 1308.7990 | 1.7432 | 48.1393   | 18780.6717  |
| 18 | A | 1385.0019 | 1.4919 | 1101.5684 | 18595.2370  |
| 19 | A | 1399.4048 | 1.7980 | 111.2277  | 76962.9584  |
| 20 | A | 1541.4238 | 8.0713 | 38.2400   | 35093.3586  |
| 21 | A | 1625.9268 | 8.2042 | 1.9016    | 107.1145    |
| 22 | A | 2825.7304 | 5.2067 | 2741.5704 | 651.7841    |
| 23 | A | 2972.1766 | 5.5245 | 14.0844   | 263070.3164 |
| 24 | A | 3149.5443 | 6.3637 | 1.7240    | 4889.0778   |
| 25 | A | 3159.9325 | 6.4346 | 13.2725   | 608469.5886 |
| 26 | A | 3181.6318 | 6.5673 | 8.1156    | 538176.5024 |
| 27 | A | 3186.2949 | 6.5640 | 4.1307    | 12012.2378  |

4.+

| NM# | Symm | Wavenumber | Force Const | IR Intens | Raman Activ |
|-----|------|------------|-------------|-----------|-------------|
| 1   | A    | 273.6523   | 0.0677      | 1.5064    | 0.1675      |
| 2   | A    | 426.3326   | 0.2418      | 0.0000    | 0.1669      |
| 3   | A    | 632.1426   | 0.2660      | 63.0475   | 0.0347      |
| 4   | A    | 802.0286   | 0.4483      | 0.0000    | 0.4205      |
| 5   | A    | 811.5202   | 2.4813      | 1.7441    | 2.8243      |
| 6   | A    | 819.8192   | 2.0549      | 0.4855    | 3.9261      |
| 7   | A    | 890.1410   | 0.6413      | 19.0023   | 0.7403      |
| 8   | A    | 935.0726   | 0.8725      | 6.8796    | 3.8230      |
| 9   | A    | 954.6812   | 1.2122      | 22.2670   | 6.3926      |
| 10  | A    | 990.5140   | 1.0614      | 0.0413    | 1.1505      |
| 11  | A    | 1012.3613  | 0.8713      | 0.0000    | 0.1789      |
| 12  | A    | 1085.5264  | 0.8707      | 11.1465   | 5.1977      |
| 13  | A    | 1109.1465  | 1.4356      | 0.0986    | 49.6500     |
| 14  | A    | 1128.3341  | 0.9881      | 3.2423    | 23.0562     |
| 15  | A    | 1151.7454  | 0.9193      | 0.0000    | 4.4761      |
| 16  | A    | 1303.1762  | 1.3881      | 12.2756   | 0.0408      |
| 17  | A    | 1339.1658  | 2.3376      | 6.5632    | 0.3347      |
| 18  | A    | 1370.2605  | 1.3451      | 71.8260   | 20.6954     |
| 19  | A    | 1448.9173  | 3.4154      | 142.8763  | 0.7656      |
| 20  | A    | 1455.4270  | 3.0160      | 2.3825    | 6.9454      |
| 21  | A    | 1478.4524  | 4.1629      | 23.7025   | 8.5372      |
| 22  | A    | 3016.4559  | 5.6994      | 31.4304   | 174.8854    |
| 23  | A    | 3034.3500  | 5.9449      | 11.8297   | 86.5047     |
| 24  | A    | 3213.1316  | 6.6327      | 5.6253    | 64.1749     |
| 25  | A    | 3218.3576  | 6.6814      | 10.3140   | 88.2467     |
| 26  | A    | 3227.3819  | 6.7350      | 16.6018   | 15.3998     |
| 27  | A    | 3236.7959  | 6.8267      | 7.9761    | 186.2615    |

4

| NM# | Symm | Wavenumber | Force Const | IR Intens | Raman Activ |
|-----|------|------------|-------------|-----------|-------------|
| 1   | A    | 346.0129   | 0.1069      | 7.5573    | 0.3961      |
| 2   | A    | 523.2015   | 0.3786      | 0.0000    | 0.0656      |
| 3   | A    | 677.9304   | 0.3172      | 85.6699   | 0.0036      |
| 4   | A    | 711.2078   | 0.3814      | 0.0000    | 0.0297      |
| 5   | A    | 819.1097   | 1.9830      | 0.0038    | 1.3877      |
| 6   | A    | 823.1060   | 2.2296      | 5.9511    | 0.5068      |
| 7   | A    | 915.7893   | 0.9092      | 33.3363   | 1.3795      |
| 8   | A    | 926.0980   | 1.0660      | 11.9053   | 7.1843      |
| 9   | A    | 953.7668   | 0.7159      | 0.0000    | 1.8561      |
| 10  | A    | 954.5471   | 0.7167      | 0.2808    | 2.0451      |
| 11  | A    | 971.2010   | 0.8969      | 16.4307   | 2.2472      |
| 12  | A    | 1016.3692  | 1.5761      | 0.1943    | 4.9883      |
| 13  | A    | 1111.8577  | 0.8174      | 2.5451    | 9.9137      |
| 14  | A    | 1125.1910  | 0.8466      | 0.0000    | 8.2360      |

|    |   |           |        |         |          |
|----|---|-----------|--------|---------|----------|
| 15 | A | 1130.3713 | 0.9504 | 0.2708  | 26.1396  |
| 16 | A | 1265.4707 | 1.5963 | 2.1614  | 1.5321   |
| 17 | A | 1314.3604 | 1.6794 | 0.9241  | 0.0176   |
| 18 | A | 1396.0234 | 1.9603 | 17.5217 | 11.2743  |
| 19 | A | 1412.9588 | 1.4266 | 9.5080  | 19.8640  |
| 20 | A | 1545.5837 | 7.9872 | 1.1402  | 102.1873 |
| 21 | A | 1631.2683 | 8.1810 | 0.0136  | 1.0936   |
| 22 | A | 3012.7764 | 5.6711 | 9.4901  | 190.4702 |
| 23 | A | 3034.9951 | 5.9600 | 7.1936  | 102.5668 |
| 24 | A | 3189.5996 | 6.5143 | 3.4696  | 107.1879 |
| 25 | A | 3199.6505 | 6.5678 | 11.6967 | 59.0444  |
| 26 | A | 3218.0206 | 6.7093 | 17.4882 | 0.7657   |
| 27 | A | 3224.3816 | 6.7762 | 2.0174  | 279.4971 |

5-

| NM# | Symm | Wavenumber | Force Const | IR Intens | Raman Activ |
|-----|------|------------|-------------|-----------|-------------|
| 1   | A    | 566.5438   | 0.2788      | 393.0598  | 143.3573    |
| 2   | A    | 670.7852   | 0.3225      | 68.1891   | 27398.6742  |
| 3   | A    | 808.5585   | 0.6645      | 3.6630    | 60.7206     |
| 4   | A    | 898.0564   | 0.6621      | 16.6555   | 70.7167     |
| 5   | A    | 918.7915   | 0.9302      | 7.0941    | 1718.3054   |
| 6   | A    | 973.8196   | 0.7464      | 13.7758   | 600.3960    |
| 7   | A    | 980.5222   | 0.8950      | 0.0218    | 1584.1918   |
| 8   | A    | 1039.3170  | 0.8947      | 4.7902    | 404.3439    |
| 9   | A    | 1089.3304  | 0.9600      | 0.5233    | 14.6631     |
| 10  | A    | 1320.0475  | 3.7038      | 0.5720    | 4208.1426   |
| 11  | A    | 1492.8158  | 1.5415      | 26.1866   | 292.5450    |
| 12  | A    | 2915.2649  | 5.2262      | 259.6061  | 2714.1958   |
| 13  | A    | 2929.3210  | 5.6217      | 65.0803   | 476.6114    |
| 14  | A    | 2977.7121  | 5.6794      | 395.8363  | 364.2171    |
| 15  | A    | 2981.8088  | 5.7559      | 3.7699    | 30532.4592  |

5

| NM# | Symm | Wavenumber | Force Const | IR Intens | Raman Activ |
|-----|------|------------|-------------|-----------|-------------|
| 1   | A    | 603.7453   | 0.2413      | 92.2686   | 0.1780      |
| 2   | A    | 782.5728   | 0.9463      | 16.8304   | 15.8710     |
| 3   | A    | 868.1285   | 0.6315      | 0.0000    | 0.0693      |
| 4   | A    | 921.0511   | 0.5688      | 4.9464    | 4.5139      |
| 5   | A    | 1012.5989  | 0.6589      | 0.0000    | 6.2317      |
| 6   | A    | 1026.3150  | 0.9694      | 39.7698   | 0.0322      |
| 7   | A    | 1065.9821  | 0.9081      | 25.9075   | 1.5406      |
| 8   | A    | 1107.9555  | 0.9291      | 1.4070    | 0.2641      |
| 9   | A    | 1146.6491  | 3.4664      | 0.2002    | 15.8447     |
| 10  | A    | 1519.0829  | 1.5167      | 1.8177    | 15.4164     |
| 11  | A    | 1726.6433  | 8.0686      | 17.5075   | 60.9053     |
| 12  | A    | 3035.2345  | 5.6813      | 72.0758   | 152.8319    |
| 13  | A    | 3099.4187  | 6.3253      | 47.4036   | 119.3004    |
| 14  | A    | 3249.1644  | 6.7428      | 0.2134    | 83.1500     |
| 15  | A    | 3296.2113  | 7.3384      | 0.0343    | 142.1508    |

6-

| NM# | Symm | Wavenumber | Force Const | IR Intens | Raman Activ |
|-----|------|------------|-------------|-----------|-------------|
| 1   | A    | 56.8169    | 0.0037      | 1.3649    | 30.1205     |
| 2   | A    | 219.0896   | 0.1013      | 0.1435    | 300.0481    |
| 3   | A    | 379.6259   | 0.2862      | 12.6504   | 13.8223     |
| 4   | A    | 413.4195   | 0.6047      | 0.0908    | 46.0843     |

|    |   |           |        |          |          |
|----|---|-----------|--------|----------|----------|
| 5  | A | 456.9097  | 0.4376 | 4.9117   | 10.8724  |
| 6  | A | 500.4881  | 0.2555 | 0.0413   | 62.2052  |
| 7  | A | 550.4030  | 0.2124 | 159.7269 | 141.7454 |
| 8  | A | 601.8723  | 0.4737 | 0.5929   | 18.3261  |
| 9  | A | 637.2268  | 0.2961 | 31.8850  | 7.0105   |
| 10 | A | 734.0136  | 0.3799 | 1.2373   | 37.0851  |
| 11 | A | 777.4739  | 1.3000 | 0.6012   | 8.7596   |
| 12 | A | 836.1484  | 1.5317 | 12.3284  | 7.8557   |
| 13 | A | 860.1375  | 0.5983 | 4.1871   | 21.1623  |
| 14 | A | 861.5113  | 0.6011 | 2.9120   | 17.6157  |
| 15 | A | 896.8479  | 1.3874 | 1.1184   | 3.6495   |
| 16 | A | 917.5529  | 1.3838 | 34.4934  | 19.6195  |
| 17 | A | 938.6031  | 1.3933 | 47.3804  | 90.8476  |
| 18 | A | 974.4923  | 1.1794 | 13.3709  | 3.8681   |
| 19 | A | 1107.1531 | 1.1357 | 8.8400   | 12.3152  |
| 20 | A | 1185.3598 | 0.9613 | 13.9843  | 73.8419  |
| 21 | A | 1187.7468 | 1.0726 | 10.8307  | 41.6474  |
| 22 | A | 1240.9203 | 0.9853 | 3.5572   | 23.0630  |
| 23 | A | 1253.7731 | 0.9777 | 0.2863   | 0.2509   |
| 24 | A | 1324.8009 | 1.9447 | 5.2661   | 94.6026  |
| 25 | A | 1383.4431 | 1.4441 | 0.1753   | 27.4475  |
| 26 | A | 1431.1296 | 1.7483 | 2.8557   | 4.4680   |
| 27 | A | 1467.3733 | 1.4140 | 2.6693   | 37.6320  |
| 28 | A | 1469.8763 | 2.3161 | 0.4500   | 108.2090 |
| 29 | A | 1525.4630 | 5.2695 | 55.0005  | 242.2902 |
| 30 | A | 1536.9025 | 6.4708 | 1.8679   | 248.3042 |
| 31 | A | 1575.8019 | 6.5024 | 66.8137  | 137.8516 |
| 32 | A | 2822.6271 | 5.0587 | 157.6468 | 355.0061 |
| 33 | A | 2955.1047 | 5.5453 | 88.3324  | 91.1763  |
| 34 | A | 3047.1613 | 5.9089 | 48.8040  | 545.2713 |
| 35 | A | 3049.5340 | 5.9267 | 16.0227  | 123.1382 |
| 36 | A | 3082.1036 | 6.0598 | 4.3822   | 295.9385 |
| 37 | A | 3096.3826 | 6.1450 | 133.3289 | 168.0421 |
| 38 | A | 3097.2164 | 6.1586 | 210.9276 | 22.4847  |
| 39 | A | 3115.9863 | 6.2453 | 48.7095  | 302.9104 |

6.+

| NM# | Symm | Wavenumber | Force Const | IR Intens | Raman Activ |
|-----|------|------------|-------------|-----------|-------------|
| 1   | A    | 86.6615    | 0.0084      | 2.0813    | 0.0764      |
| 2   | A    | 216.6233   | 0.0779      | 0.0000    | 0.0046      |
| 3   | A    | 359.0629   | 0.1528      | 0.6257    | 0.0000      |
| 4   | A    | 412.1169   | 0.6308      | 0.0426    | 6.0108      |
| 5   | A    | 424.9265   | 0.7207      | 0.9800    | 7.9255      |
| 6   | A    | 508.0547   | 0.3751      | 0.0000    | 0.0158      |
| 7   | A    | 625.8519   | 0.2609      | 81.2046   | 0.1358      |
| 8   | A    | 797.5018   | 1.9767      | 5.3816    | 55.2951     |
| 9   | A    | 801.3579   | 0.5663      | 9.0592    | 1.6523      |
| 10  | A    | 806.4003   | 0.4597      | 0.0000    | 0.1630      |
| 11  | A    | 876.6746   | 2.6043      | 0.0008    | 4.6949      |
| 12  | A    | 889.2143   | 2.5169      | 0.1341    | 0.8225      |
| 13  | A    | 937.7140   | 1.4998      | 0.0141    | 26.5630     |
| 14  | A    | 941.8116   | 1.1371      | 2.6420    | 0.4624      |
| 15  | A    | 960.1747   | 0.8303      | 1.5020    | 1.1874      |
| 16  | A    | 1012.9805  | 0.7599      | 0.0000    | 0.0339      |
| 17  | A    | 1041.7878  | 0.9445      | 0.0000    | 0.0896      |
| 18  | A    | 1046.4997  | 0.9222      | 0.8071    | 0.8770      |
| 19  | A    | 1134.5910  | 1.1898      | 0.4813    | 7.2420      |
| 20  | A    | 1220.6620  | 0.9856      | 0.0000    | 4.6316      |
| 21  | A    | 1250.7215  | 1.1782      | 18.4614   | 15.0331     |
| 22  | A    | 1274.8942  | 1.1146      | 25.9145   | 2.3918      |
| 23  | A    | 1315.4035  | 1.0719      | 0.0168    | 0.0241      |
| 24  | A    | 1358.4596  | 1.1573      | 78.2967   | 31.5811     |



|    |   |           |        |         |          |
|----|---|-----------|--------|---------|----------|
| 25 | A | 1417.7509 | 1.5648 | 13.4069 | 1.5735   |
| 26 | A | 1453.9453 | 2.1618 | 8.9795  | 0.6308   |
| 27 | A | 1484.9456 | 1.8514 | 23.3876 | 0.7367   |
| 28 | A | 1523.6679 | 2.7090 | 31.8011 | 0.3393   |
| 29 | A | 1571.1571 | 6.6198 | 94.3114 | 39.9898  |
| 30 | A | 1596.4011 | 6.5136 | 6.0444  | 8.5405   |
| 31 | A | 1655.8933 | 8.2404 | 47.4628 | 22.2807  |
| 32 | A | 2919.0533 | 5.4606 | 6.0554  | 122.9528 |
| 33 | A | 2932.3701 | 5.3876 | 16.3490 | 238.6548 |
| 34 | A | 3158.1715 | 6.3846 | 0.8651  | 52.8974  |
| 35 | A | 3159.3003 | 6.4004 | 1.5705  | 64.1587  |
| 36 | A | 3167.8421 | 6.4338 | 0.3528  | 78.2169  |
| 37 | A | 3176.9418 | 6.4875 | 0.1608  | 120.2997 |
| 38 | A | 3183.5126 | 6.5234 | 2.0461  | 18.6159  |
| 39 | A | 3188.5295 | 6.5551 | 1.1220  | 325.7772 |

6

| NM# | Symm | Wavenumber | Force Const | IR Intens | Raman Activ |
|-----|------|------------|-------------|-----------|-------------|
| 1   | A    | 223.0715   | 0.0639      | 0.3528    | 3.2992      |
| 2   | A    | 293.7621   | 0.1525      | 0.7494    | 2.1344      |
| 3   | A    | 357.6109   | 0.2390      | 2.3800    | 2.2108      |
| 4   | A    | 417.8744   | 0.5320      | 0.5743    | 4.2375      |
| 5   | A    | 431.7936   | 0.2402      | 7.4039    | 7.6365      |
| 6   | A    | 609.6695   | 0.5604      | 4.4131    | 2.9823      |
| 7   | A    | 668.3919   | 0.5020      | 19.1340   | 1.4450      |
| 8   | A    | 724.6652   | 0.4709      | 80.8890   | 0.5965      |
| 9   | A    | 758.6422   | 0.4926      | 33.7529   | 0.1910      |
| 10  | A    | 812.5716   | 0.6252      | 2.0514    | 2.7233      |
| 11  | A    | 890.8468   | 1.8117      | 0.0687    | 0.1268      |
| 12  | A    | 924.7551   | 1.5056      | 3.2104    | 33.3127     |
| 13  | A    | 942.1515   | 1.2316      | 0.5593    | 6.0279      |
| 14  | A    | 963.1399   | 1.4016      | 1.5342    | 0.8823      |
| 15  | A    | 978.1776   | 0.8390      | 0.3309    | 8.1704      |
| 16  | A    | 982.4191   | 0.7571      | 0.8074    | 5.0068      |
| 17  | A    | 1000.6328  | 0.7593      | 0.0446    | 4.1559      |
| 18  | A    | 1043.3358  | 1.4580      | 2.0735    | 3.1224      |
| 19  | A    | 1069.7183  | 1.2079      | 1.5872    | 1.7773      |
| 20  | A    | 1209.3182  | 0.9560      | 0.0435    | 0.1556      |
| 21  | A    | 1220.3627  | 1.0153      | 0.7503    | 16.8548     |
| 22  | A    | 1247.2755  | 1.0037      | 0.3481    | 11.8382     |
| 23  | A    | 1269.8123  | 1.0595      | 0.5392    | 3.3412      |
| 24  | A    | 1325.8545  | 1.5146      | 2.1378    | 1.6072      |
| 25  | A    | 1384.9618  | 1.4928      | 0.9905    | 0.5451      |
| 26  | A    | 1424.0744  | 1.7705      | 4.0083    | 2.0312      |
| 27  | A    | 1475.8508  | 2.2680      | 0.0254    | 12.9989     |
| 28  | A    | 1480.4855  | 1.4227      | 7.6468    | 8.2552      |
| 29  | A    | 1569.9408  | 11.4327     | 0.1025    | 185.7126    |
| 30  | A    | 1659.2388  | 10.0474     | 1.9016    | 33.8804     |
| 31  | A    | 1666.1704  | 7.8021      | 0.3433    | 8.2688      |
| 32  | A    | 2994.6744  | 5.6507      | 29.0494   | 111.3139    |
| 33  | A    | 3092.6901  | 6.1556      | 21.1880   | 77.8906     |
| 34  | A    | 3127.9390  | 6.2412      | 0.4289    | 21.2650     |
| 35  | A    | 3134.2306  | 6.2807      | 2.1416    | 113.6725    |
| 36  | A    | 3140.6701  | 6.3109      | 7.2737    | 141.8785    |
| 37  | A    | 3154.7731  | 6.4057      | 47.0739   | 59.8538     |
| 38  | A    | 3161.7211  | 6.4501      | 36.7002   | 76.8092     |
| 39  | A    | 3165.9212  | 6.4716      | 5.5993    | 420.0422    |

**Comparison of the diabatic electronic excitations** of molecule **1**, computed at different levels of theory, corresponding linear regression parameters and RMSDs, compared to experimental data.

Reference data:

(1) Data from Haselbach *et al* [10.1002/1522-2675(20010613)84:6<1670::AID-HLCA1670>3.0.CO;2-K], obtained with electron-energy loss spectroscopy with residual electron energy 1.1 eV, and their symmetry description as in the cited paper.

| Exper. EELS (eV) | Exper. UV-vis (eV) | Transition symmetry           | Type of transition (valence/Rydberg) | Main orbitals involved           |                          |                          |
|------------------|--------------------|-------------------------------|--------------------------------------|----------------------------------|--------------------------|--------------------------|
| 4.46             | 4.53               | 1 <sup>1</sup> E              | V                                    | 1a <sub>2</sub> →8e              |                          |                          |
| 5.78             | 6.05               | 2 <sup>1</sup> E              | V                                    | 1b <sub>1</sub> →8e              |                          |                          |
| 5.90             |                    | 3 <sup>1</sup> E              | R                                    | 1a <sub>2</sub> →9e(R)           |                          |                          |
| 6.40             |                    | 4 <sup>1</sup> E              | R                                    | 1a <sub>2</sub> →10e(R)          |                          |                          |
| 7.13             |                    | 5 <sup>1</sup> E              | R                                    | 1b <sub>1</sub> →9e(R)           | +1a <sub>2</sub> →11e(R) | +1b <sub>1</sub> →10e(R) |
| 7.40             |                    | 3 <sup>1</sup> B <sub>2</sub> | V                                    | 1a <sub>2</sub> →2b <sub>1</sub> | +7e→8e                   |                          |

(2) Data from Batich *et al.* [10.1021/ja00832a011], obtained from UV-Vis spectrum, i.e. transitions with energies 4.53 and 6.05 eV.

Data obtained in the present work at different levels of theory, and corresponding RMSDs with respect to both reference data sets are reported as follows. The considered electronic transitions were correlated with those of Haselbach *et al.* and Batich *et al.* by means of symmetry. For the sake of clarity, the numbers of transitions in the left column are those indicated in the work of Haselbach *et al.*

*Singlet excitations (TD-DFT) for molecule 1*

| Transition            | Hybrid functionals |            |             |           |            |             |         |            |             |         |            |             |         |            |             |
|-----------------------|--------------------|------------|-------------|-----------|------------|-------------|---------|------------|-------------|---------|------------|-------------|---------|------------|-------------|
|                       | B3LYP              |            |             | CAM-B3LYP |            |             | M06-2X  |            |             | PBE0    |            |             | wB97XD  |            |             |
|                       | 6-31+G*            | 6-311++G** | Aug-cc-pVTZ | 6-31+G*   | 6-311++G** | Aug-cc-pVTZ | 6-31+G* | 6-311++G** | Aug-cc-pVTZ | 6-31+G* | 6-311++G** | Aug-cc-pVTZ | 6-31+G* | 6-311++G** | Aug-cc-pVTZ |
| <b>S<sub>1</sub></b>  | 3.97               | 3.97       | 3.95        | 4.46      | 4.45       | 4.43        | 4.49    | 4.47       | 4.47        | 4.11    | 4.10       | 4.09        | 4.48    | 4.47       | 4.46        |
| <b>S<sub>4</sub></b>  | 5.36               | 5.51       | 5.40        | 5.83      | 5.82       | 5.81        | 5.87    | 5.81       | 5.84        | 5.49    | 5.75       | 5.63        | 5.84    | 5.83       | 5.82        |
| <b>S<sub>6</sub></b>  | 5.73               | 6.11       | 5.91        | 6.22      | 5.99       | 5.87        | 6.12    | 5.86       | 5.73        | 5.99    | 5.75       | 6.16        | 6.52    | 6.21       | 6.04        |
| <b>S<sub>11</sub></b> | 6.27               | 6.11       | 6.56        | 6.22      | 6.61       | 6.43        | 6.64    | 6.44       | 6.30        | 6.53    | 6.37       | 6.16        | 6.52    | 6.21       | 6.58        |
| <b>S<sub>19</sub></b> | 7.25               | 7.12       | 7.12        | 6.75      | 7.33       | 7.17        | 7.42    | 7.14       | 7.03        | 7.23    | 6.98       | 7.10        | 7.03    | 6.82       | 7.32        |
| <b>S<sub>20</sub></b> | 7.42               | 7.40       | 7.31        | 7.58      | 7.58       | 7.61        | 7.60    | 7.51       | 7.60        | 6.14    | 7.39       | 7.46        | 7.67    | 7.65       | 7.64        |
| <b>RMSD vs EELS</b>   | 0.2826             | 0.2734     | 0.2700      | 0.2278    | 0.1471     | 0.0883      | 0.2008  | 0.0536     | 0.1224      | 0.5518  | 0.1709     | 0.2197      | 0.2858  | 0.2203     | 0.1566      |
| <b>RMSD vs UV-Vis</b> | 0.6284             | 0.5501     | 0.6160      | 0.1632    | 0.1722     | 0.1838      | 0.1304  | 0.1749     | 0.1544      | 0.4950  | 0.3707     | 0.4301      | 0.1526  | 0.1612     | 0.1700      |

| Transition            | Pure functionals |            |             |         |            |             |         |            |             |         |            |             |
|-----------------------|------------------|------------|-------------|---------|------------|-------------|---------|------------|-------------|---------|------------|-------------|
|                       | BLYP             |            |             | BP86    |            |             | PBE     |            |             | PW91    |            |             |
|                       | 6-31+G*          | 6-311++G** | Aug-cc-pVTZ | 6-31+G* | 6-311++G** | Aug-cc-pVTZ | 6-31+G* | 6-311++G** | Aug-cc-pVTZ | 6-31+G* | 6-311++G** | Aug-cc-pVTZ |
| <b>S<sub>1</sub></b>  | 5.04             | 4.95       | 4.86        | 5.12    | 5.10       | 5.07        | 5.11    | 5.08       | 5.04        | 5.07    | 5.04       | 5.02        |
| <b>S<sub>4</sub></b>  | 5.28             | 6.12       | 6.00        | 5.12    | 5.43       | 5.27        | 5.47    | 5.27       | 6.25        | 5.30    | 6.28       | 6.22        |
| <b>S<sub>6</sub></b>  | 5.79             | 5.62       | 6.32        | 5.72    | 6.01       | 5.75        | 5.98    | 5.85       | 5.67        | 5.83    | 5.78       | 5.67        |
| <b>S<sub>11</sub></b> | 6.73             | 6.64       | 6.32        | 6.22    | 6.01       | 6.66        | 5.98    | 6.88       | 6.58        | 6.72    | 6.82       | 6.59        |
| <b>S<sub>19</sub></b> | 5.28             | 5.11       | 5.06        | 5.12    | 5.43       | 5.27        | 5.47    | 5.27       | 5.18        | 5.30    | 5.21       | 5.17        |
| <b>S<sub>20</sub></b> | 6.99             | 6.97       | 6.87        | 7.28    | 7.29       | 6.97        | 7.08    | 7.07       | 6.94        | 7.00    | 6.98       | 6.92        |
| <b>RMSD vs EELS</b>   | 0.8477           | 0.8908     | 0.9091      | 0.9127  | 0.7739     | 0.8531      | 0.7715  | 0.8588     | 0.8808      | 0.8370  | 0.8772     | 0.8828      |
| <b>RMSD vs UV-Vis</b> | 0.6531           | 0.3011     | 0.2360      | 0.7788  | 0.5955     | 0.6708      | 0.5800  | 0.6749     | 0.3874      | 0.6535  | 0.3956     | 0.3667      |

*Singlet excitations (TDA-DFT) for molecule 1*

| Transition            | Hybrid functionals |            |             |           |            |             |         |            |             |         |            |             |         |            |             |
|-----------------------|--------------------|------------|-------------|-----------|------------|-------------|---------|------------|-------------|---------|------------|-------------|---------|------------|-------------|
|                       | B3LYP              |            |             | CAM-B3LYP |            |             | M06-2X  |            |             | PBE0    |            |             | wB97XD  |            |             |
|                       | 6-31+G*            | 6-311++G** | Aug-cc-pVTZ | 6-31+G*   | 6-311++G** | Aug-cc-pVTZ | 6-31+G* | 6-311++G** | Aug-cc-pVTZ | 6-31+G* | 6-311++G** | Aug-cc-pVTZ | 6-31+G* | 6-311++G** | Aug-cc-pVTZ |
| <b>S<sub>1</sub></b>  | 4.06               | 4.06       | 4.04        | 4.63      | 4.62       | 4.60        | 4.65    | 4.64       | 4.63        | 4.21    | 4.20       | 4.19        | 4.65    | 4.64       | 4.63        |
| <b>S<sub>4</sub></b>  | 5.76               | 5.63       | 5.58        | 5.99      | 5.96       | 5.87        | 6.04    | 5.81       | 6.02        | 5.70    | 5.80       | 5.72        | 6.00    | 5.99       | 5.97        |
| <b>S<sub>6</sub></b>  | 5.76               | 6.12       | 5.91        | 5.99      | 5.96       | 5.87        | 6.04    | 5.81       | 5.74        | 6.01    | 5.80       | 5.72        | 6.53    | 6.22       | 5.97        |
| <b>S<sub>11</sub></b> | 6.27               | 6.12       | 6.57        | 6.23      | 6.62       | 6.44        | 6.64    | 6.45       | 6.31        | 6.54    | 6.37       | 6.17        | 6.53    | 6.22       | 6.59        |
| <b>S<sub>19</sub></b> | 7.25               | 7.12       | 7.12        | 6.76      | 7.34       | 7.17        | 7.43    | 7.15       | 7.04        | 7.23    | 6.98       | 7.10        | 7.04    | 6.83       | 7.32        |
| <b>S<sub>20</sub></b> | 7.20               | 7.21       | 5.94        | 7.66      | 8.02       | 6.52        | 8.05    | 8.02       | 6.57        | 6.16    | 7.44       | 6.11        | 7.87    | 7.86       | 7.98        |
| <b>RMSD vs EELS</b>   | 0.2039             | 0.2418     | 0.6295      | 0.2291    | 0.2985     | 0.3661      | 0.3416  | 0.2679     | 0.3700      | 0.5220  | 0.1298     | 0.5505      | 0.3503  | 0.2934     | 0.2832      |
| <b>RMSD vs UV-Vis</b> | 0.4801             | 0.0825     | 0.0900      | 0.1366    | 0.0851     | 0.1867      | 0.0738  | 0.3353     | 0.2927      | 0.3350  | 0.0919     | 0.0886      | 0.0906  | 0.4801     | 0.0825      |

| Transition            | Pure functionals |            |             |         |            |             |         |            |             |         |            |             |
|-----------------------|------------------|------------|-------------|---------|------------|-------------|---------|------------|-------------|---------|------------|-------------|
|                       | BLYP             |            |             | BP86    |            |             | PBE     |            |             | PW91    |            |             |
|                       | 6-31+G*          | 6-311++G** | Aug-cc-pVTZ | 6-31+G* | 6-311++G** | Aug-cc-pVTZ | 6-31+G* | 6-311++G** | Aug-cc-pVTZ | 6-31+G* | 6-311++G** | Aug-cc-pVTZ |
| <b>S<sub>1</sub></b>  | 5.19             | 4.98       | 4.87        | 3.62    | 3.61       | 5.22        | 3.62    | 5.19       | 5.10        | 5.21    | 5.12       | 5.08        |
| <b>S<sub>4</sub></b>  | 5.40             | 5.63       | 6.00        | 5.74    | 5.49       | 5.41        | 5.53    | 5.44       | 5.40        | 5.45    | 5.41       | 5.39        |
| <b>S<sub>6</sub></b>  | 5.79             | 5.63       | 6.33        | 5.74    | 6.02       | 5.75        | 5.99    | 5.86       | 5.67        | 5.84    | 5.79       | 5.67        |
| <b>S<sub>11</sub></b> | 6.73             | 6.65       | 6.33        | 6.23    | 6.02       | 6.66        | 6.77    | 6.88       | 6.59        | 6.76    | 6.74       | 6.60        |
| <b>S<sub>19</sub></b> | 6.82             | 5.63       | 5.42        | 5.74    | 5.49       | 5.41        | 5.53    | 5.44       | 5.40        | 5.45    | 5.41       | 5.39        |
| <b>S<sub>20</sub></b> | 7.17             | 7.15       | 5.39        | 7.36    | 7.36       | 7.18        | 7.25    | 7.23       | 7.15        | 7.20    | 7.19       | 7.13        |
| <b>RMSD vs EELS</b>   | 0.3966           | 0.6740     | 1.1101      | 0.6713  | 0.7796     | 0.7984      | 0.7634  | 0.7937     | 0.7873      | 0.7832  | 0.7839     | 0.7904      |
| <b>RMSD vs UV-Vis</b> | 0.6550           | 0.4353     | 0.2430      | 0.6798  | 0.7616     | 0.6655      | 0.7411  | 0.6355     | 0.6113      | 0.6412  | 0.6155     | 0.6075      |

*Triplet excitations (TD-DFT) for molecule 1*

| Transition           | Hybrid functionals |            |             |           |            |             |         |            |             |         |            |             |         |            |             |
|----------------------|--------------------|------------|-------------|-----------|------------|-------------|---------|------------|-------------|---------|------------|-------------|---------|------------|-------------|
|                      | B3LYP              |            |             | CAM-B3LYP |            |             | M06-2X  |            |             | PBE0    |            |             | wB97XD  |            |             |
|                      | 6-31+G*            | 6-311++G** | Aug-cc-pVTZ | 6-31+G*   | 6-311++G** | Aug-cc-pVTZ | 6-31+G* | 6-311++G** | Aug-cc-pVTZ | 6-31+G* | 6-311++G** | Aug-cc-pVTZ | 6-31+G* | 6-311++G** | Aug-cc-pVTZ |
| <b>T<sub>1</sub></b> | 2.57               | 2.58       | 2.57        | 2.50      | 2.51       | 2.51        | 3.10    | 3.06       | 3.05        | 2.44    | 2.44       | 2.43        | 2.65    | 2.66       | 5.29        |
| <b>T<sub>2</sub></b> | 4.58               | 4.57       | 4.55        | 4.53      | 4.53       | 4.51        | 5.08    | 5.02       | 5.00        | 4.48    | 4.47       | 4.44        | 4.70    | 4.69       | 4.67        |
| <b>T<sub>3</sub></b> | 4.84               | 4.84       | 4.83        | 4.73      | 4.73       | 4.73        | 5.29    | 5.25       | 5.23        | 4.71    | 4.71       | 4.69        | 4.89    | 4.89       | 4.87        |
| <b>T<sub>4</sub></b> | 4.51               | 4.51       | 4.50        | 5.26      | 5.25       | 5.24        | 5.32    | 5.30       | 5.31        | 4.65    | 4.65       | 4.64        | 5.29    | 5.29       | 5.29        |
| <b>RMSD vs EELS</b>  | 0.3285             | 0.3258     | 0.3269      | 0.3196    | 0.3137     | 0.3108      | 0.5350  | 0.4976     | 0.4865      | 0.3136  | 0.3103     | 0.3148      | 0.3329  | 0.3281     | 1.1857      |

| Transition           | Pure functionals |            |             |         |            |             |         |            |             |         |            |             |
|----------------------|------------------|------------|-------------|---------|------------|-------------|---------|------------|-------------|---------|------------|-------------|
|                      | BLYP             |            |             | BP86    |            |             | PBE     |            |             | PW91    |            |             |
|                      | 6-31+G*          | 6-311++G** | Aug-cc-pVTZ | 6-31+G* | 6-311++G** | Aug-cc-pVTZ | 6-31+G* | 6-311++G** | Aug-cc-pVTZ | 6-31+G* | 6-311++G** | Aug-cc-pVTZ |
| <b>T<sub>1</sub></b> | 2.66             | 2.67       | 2.66        | 2.64    | 2.65       | 2.64        | 2.65    | 2.65       | 2.64        | 2.63    | 2.63       | 2.62        |
| <b>T<sub>2</sub></b> | 4.60             | 4.59       | 4.57        | 4.59    | 4.57       | 4.55        | 4.59    | 4.58       | 4.55        | 4.57    | 4.56       | 4.53        |
| <b>T<sub>3</sub></b> | 4.96             | 4.96       | 4.95        | 4.94    | 4.94       | 4.92        | 4.94    | 4.94       | 4.92        | 4.91    | 4.92       | 4.90        |
| <b>T<sub>4</sub></b> | 4.01             | 4.01       | 4.00        | 4.04    | 4.03       | 4.02        | 4.03    | 4.03       | 4.02        | 4.02    | 4.02       | 4.01        |
| <b>RMSD vs EELS</b>  | 0.5235           | 0.5228     | 0.5239      | 0.5120  | 0.5115     | 0.5119      | 0.5117  | 0.5110     | 0.5117      | 0.5151  | 0.5144     | 0.5157      |

*Triplet excitations (TDA-DFT) for molecule 1*

| Transition           | Hybrid functionals |            |             |           |            |             |         |            |             |         |            |             |         |            |             |
|----------------------|--------------------|------------|-------------|-----------|------------|-------------|---------|------------|-------------|---------|------------|-------------|---------|------------|-------------|
|                      | B3LYP              |            |             | CAM-B3LYP |            |             | M06-2X  |            |             | PBE0    |            |             | wB97XD  |            |             |
|                      | 6-31+G*            | 6-311++G** | Aug-cc-pVTZ | 6-31+G*   | 6-311++G** | Aug-cc-pVTZ | 6-31+G* | 6-311++G** | Aug-cc-pVTZ | 6-31+G* | 6-311++G** | Aug-cc-pVTZ | 6-31+G* | 6-311++G** | Aug-cc-pVTZ |
| <b>T<sub>1</sub></b> | 2.86               | 2.86       | 2.86        | 2.92      | 2.92       | 2.92        | 3.25    | 3.23       | 3.23        | 2.83    | 2.83       | 2.83        | 3.00    | 3.01       | 5.32        |
| <b>T<sub>2</sub></b> | 4.78               | 4.77       | 4.76        | 4.80      | 4.79       | 4.78        | 5.18    | 5.13       | 5.12        | 4.74    | 4.73       | 4.72        | 4.93    | 4.92       | 4.91        |
| <b>T<sub>3</sub></b> | 5.07               | 5.07       | 5.07        | 5.02      | 5.02       | 5.02        | 5.41    | 5.37       | 5.37        | 5.01    | 5.01       | 5.00        | 5.14    | 5.14       | 5.13        |
| <b>T<sub>4</sub></b> | 4.55               | 4.55       | 4.54        | 5.29      | 5.29       | 5.28        | 5.34    | 5.33       | 5.33        | 4.70    | 4.69       | 4.69        | 5.32    | 5.32       | 5.32        |
| <b>RMSD vs EELS</b>  | 0.3655             | 0.3633     | 0.3607      | 0.3585    | 0.3546     | 0.3496      | 0.6233  | 0.5912     | 0.5856      | 0.3052  | 0.3021     | 0.2977      | 0.4380  | 0.4346     | 1.2437      |

| Transition           | Pure functionals |            |             |         |            |             |         |            |             |         |            |             |
|----------------------|------------------|------------|-------------|---------|------------|-------------|---------|------------|-------------|---------|------------|-------------|
|                      | BLYP             |            |             | BP86    |            |             | PBE     |            |             | PW91    |            |             |
|                      | 6-31+G*          | 6-311++G** | Aug-cc-pVTZ | 6-31+G* | 6-311++G** | Aug-cc-pVTZ | 6-31+G* | 6-311++G** | Aug-cc-pVTZ | 6-31+G* | 6-311++G** | Aug-cc-pVTZ |
| <b>T<sub>1</sub></b> | 2.79             | 2.80       | 2.80        | 2.79    | 2.80       | 2.79        | 2.80    | 2.80       | 2.80        | 2.78    | 2.79       | 2.78        |
| <b>T<sub>2</sub></b> | 4.70             | 4.69       | 4.68        | 4.70    | 4.69       | 4.67        | 4.71    | 4.69       | 4.68        | 4.69    | 4.68       | 4.66        |
| <b>T<sub>3</sub></b> | 5.10             | 5.10       | 5.09        | 5.09    | 5.09       | 5.08        | 5.09    | 5.09       | 5.08        | 5.07    | 5.07       | 5.06        |
| <b>T<sub>4</sub></b> | 4.05             | 4.05       | 4.04        | 4.08    | 4.07       | 4.07        | 4.07    | 4.07       | 4.07        | 4.06    | 4.06       | 4.06        |
| <b>RMSD vs EELS</b>  | 0.5329           | 0.5325     | 0.5315      | 0.5215  | 0.5205     | 0.5181      | 0.5215  | 0.5206     | 0.5186      | 0.5208  | 0.5204     | 0.5189      |

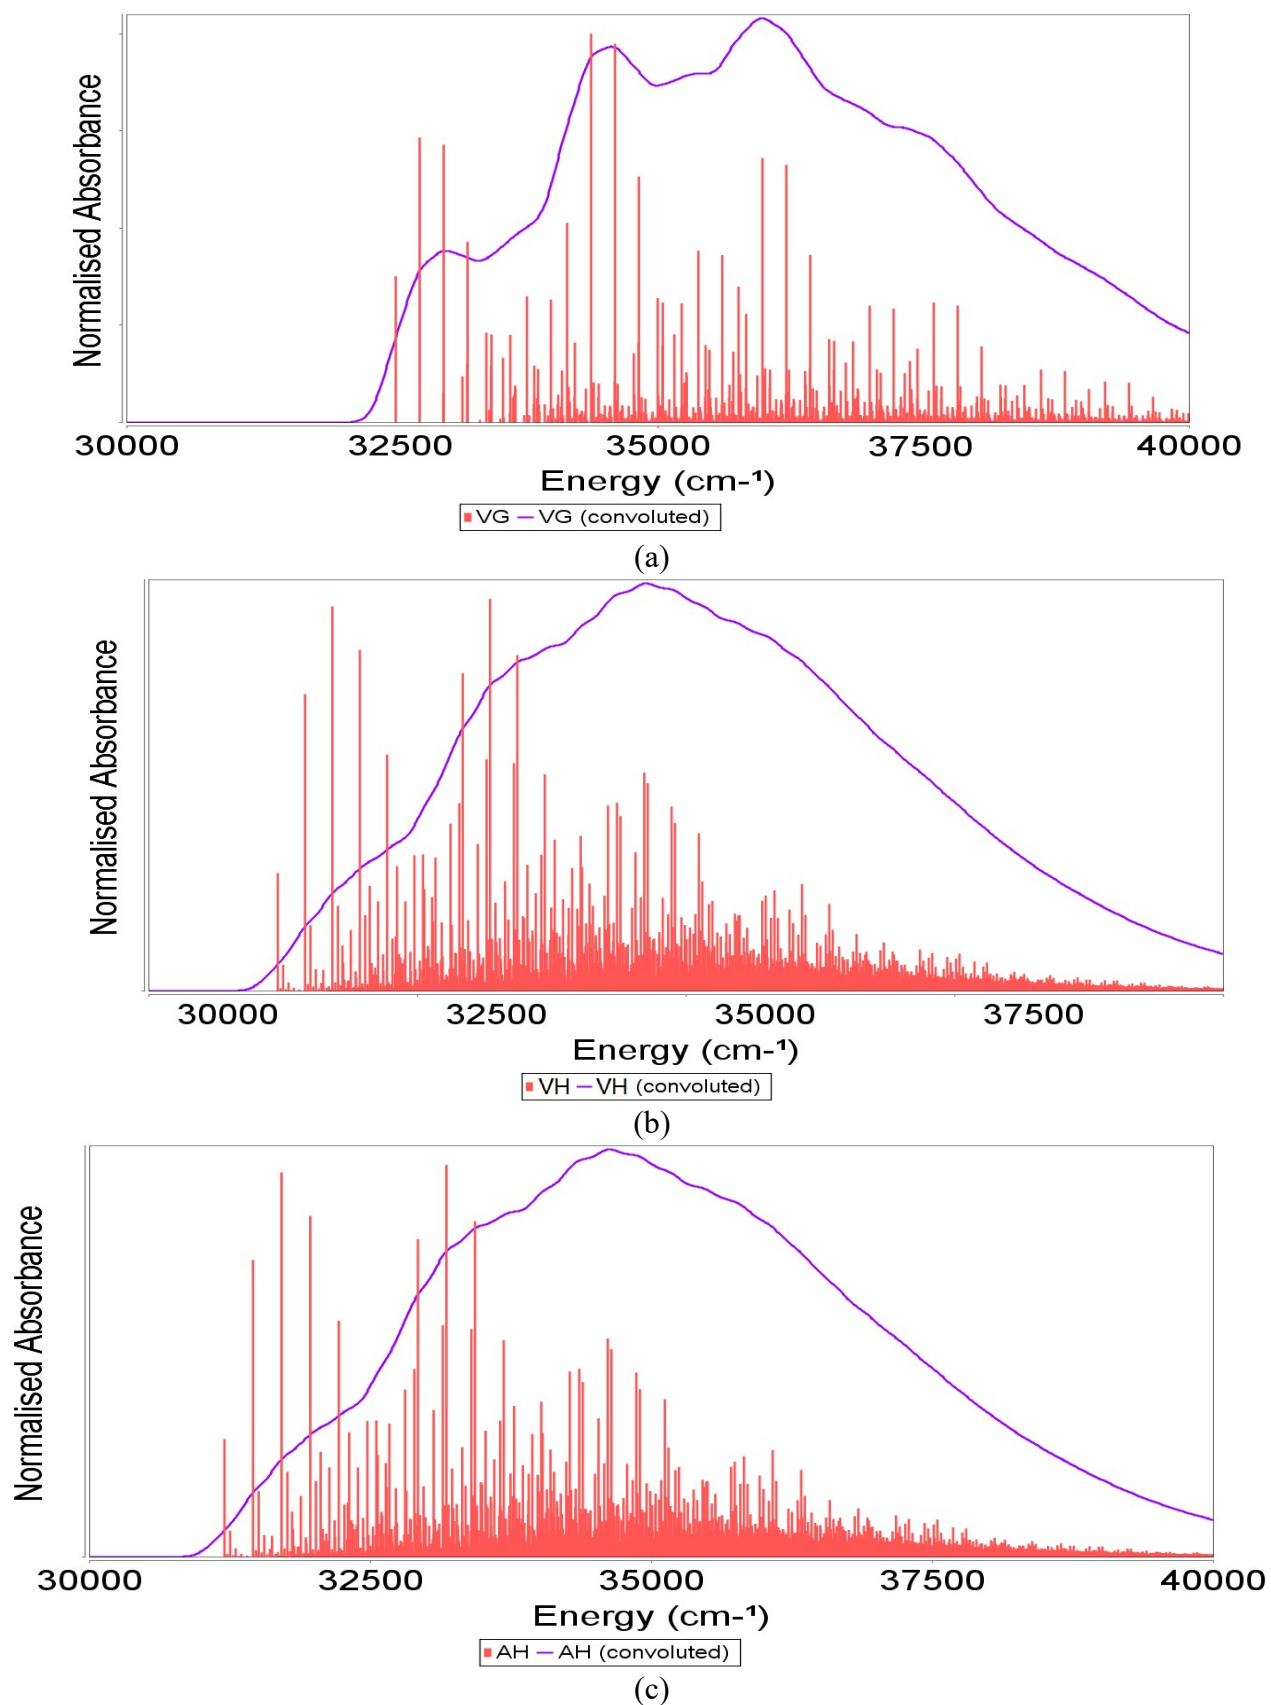

**Figure S6.** Vibronic progressions of the first UV-Vis absorption band computed at TD-DFT CAM-B3LYP / 6-311++G\*\* ((a) VG, (b) VH and (c) AH; red sticks) and their Gaussian convolution (HWHM = 150 cm<sup>-1</sup>; purple line) in gas phase. No shift along the energy axis was applied.
